# Supplementary material
Source: publisher figshare collection journal article supplement (https://gsapubs.figshare.com/articles/dataset/_/21538512)

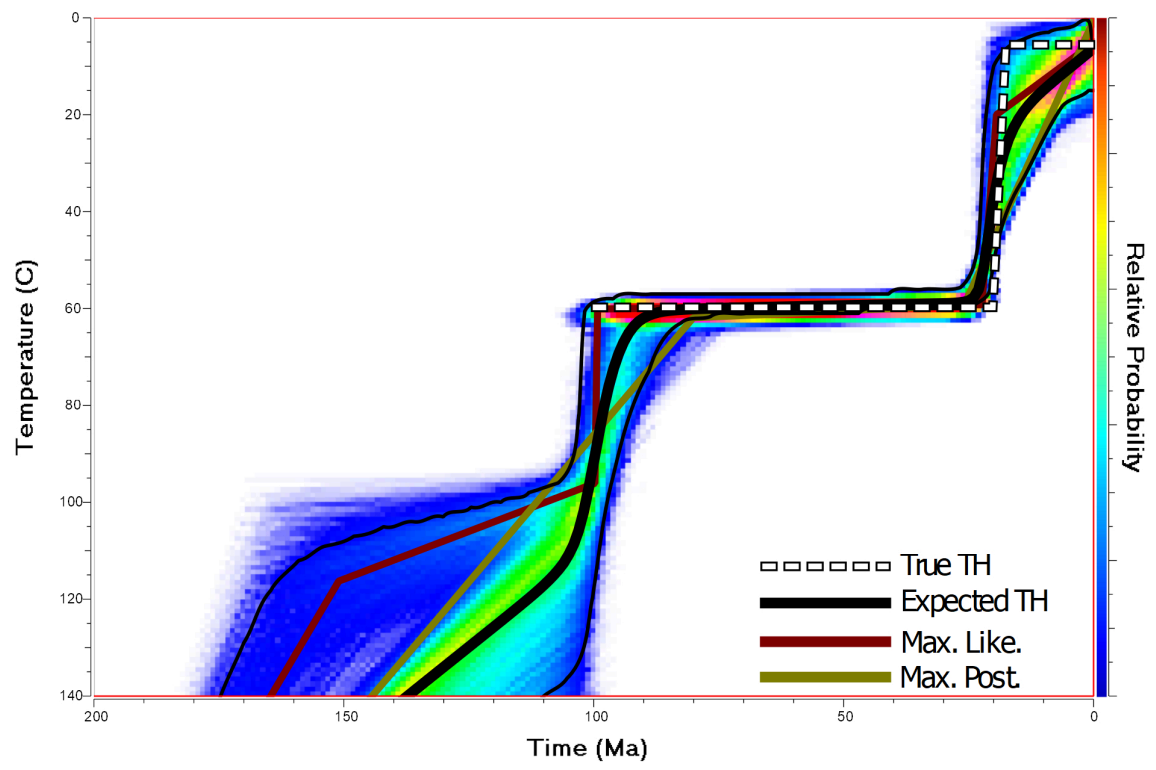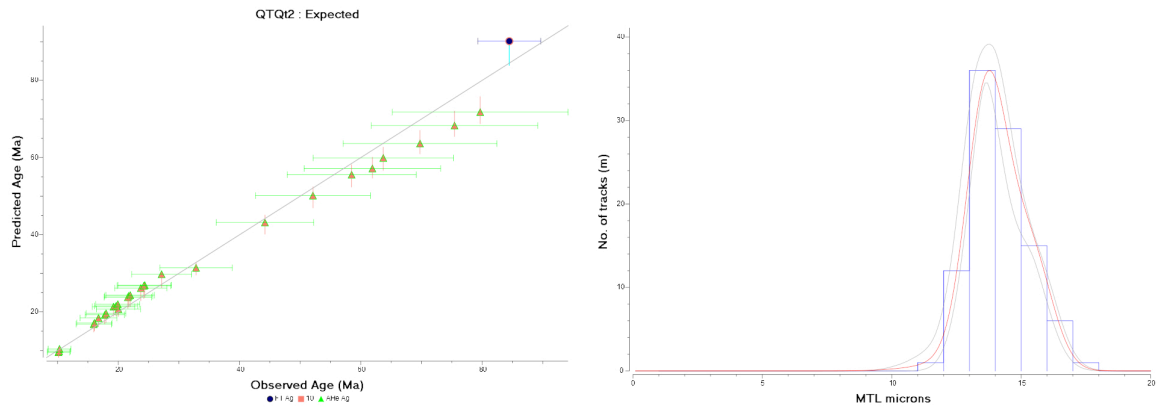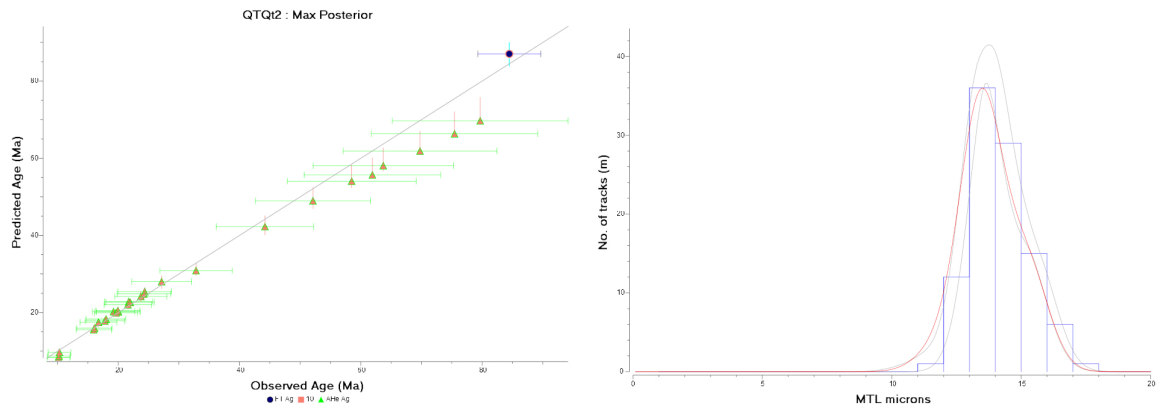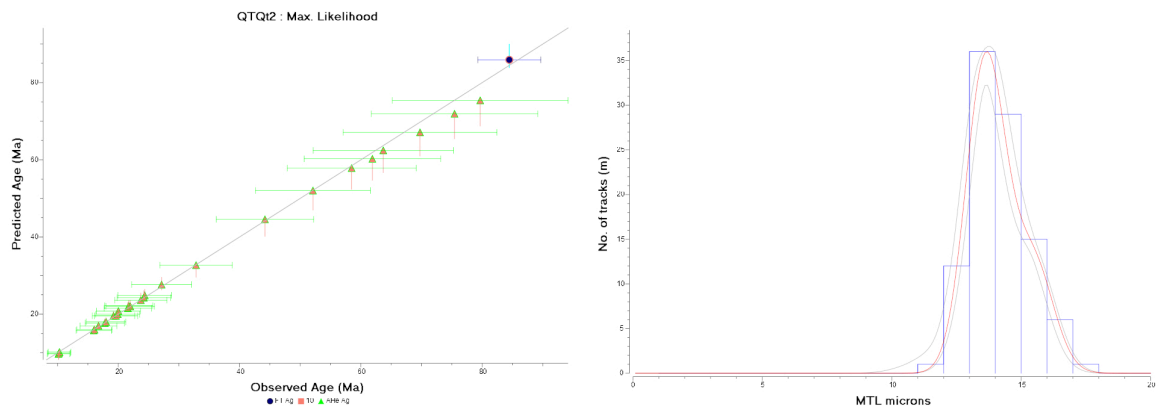

**Path 1****Expected TH****Max. Like. TH****Max. Post TH**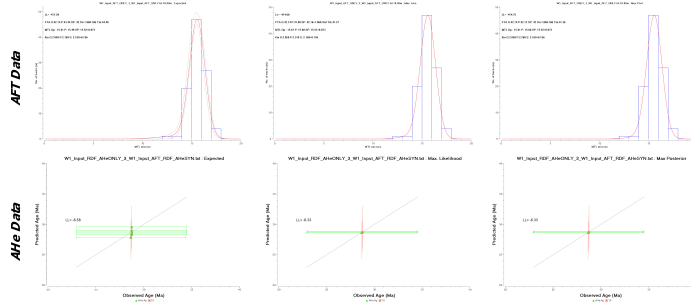**Path 2****Expected TH****Max. Like. TH****Max. Post TH**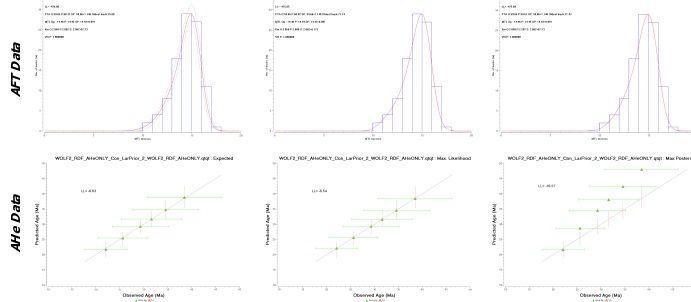**Path 3****Expected TH****Max. Like. TH****Max. Post TH**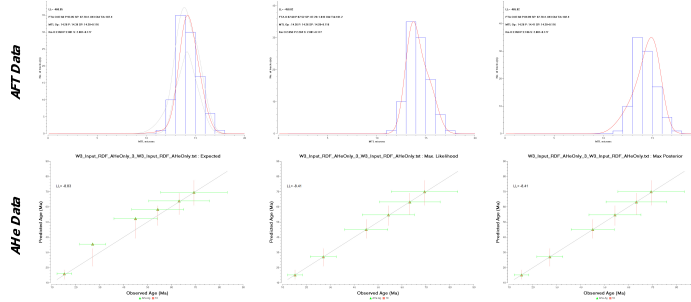**Path 4****Expected TH****Max. Like. TH****Max. Post TH**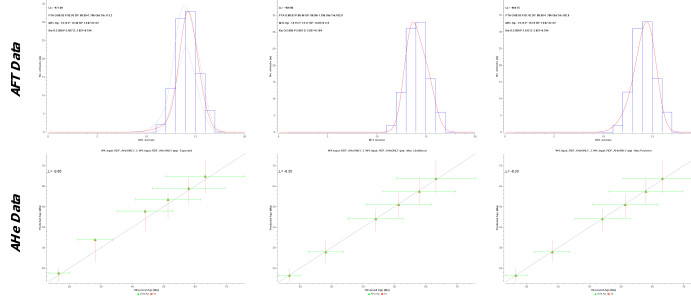**Path 5****Expected TH****Max. Like. TH****Max. Post TH**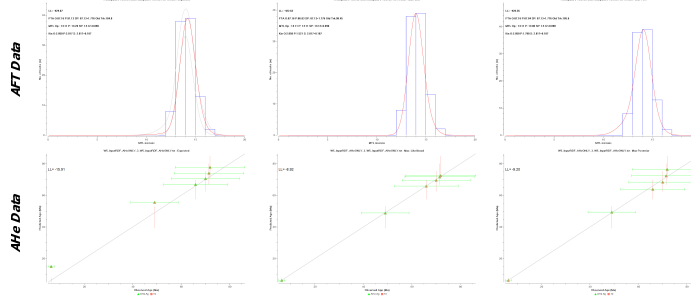**Path 6****Expected TH****Max. Like. TH****Max. Post TH**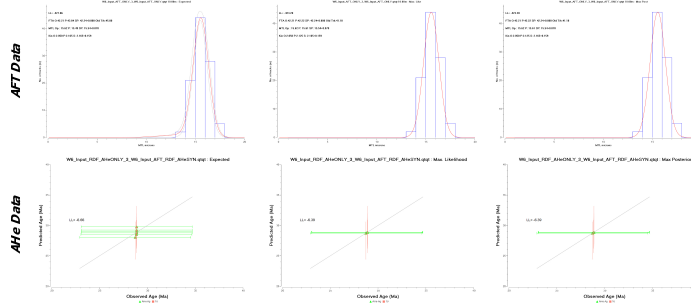

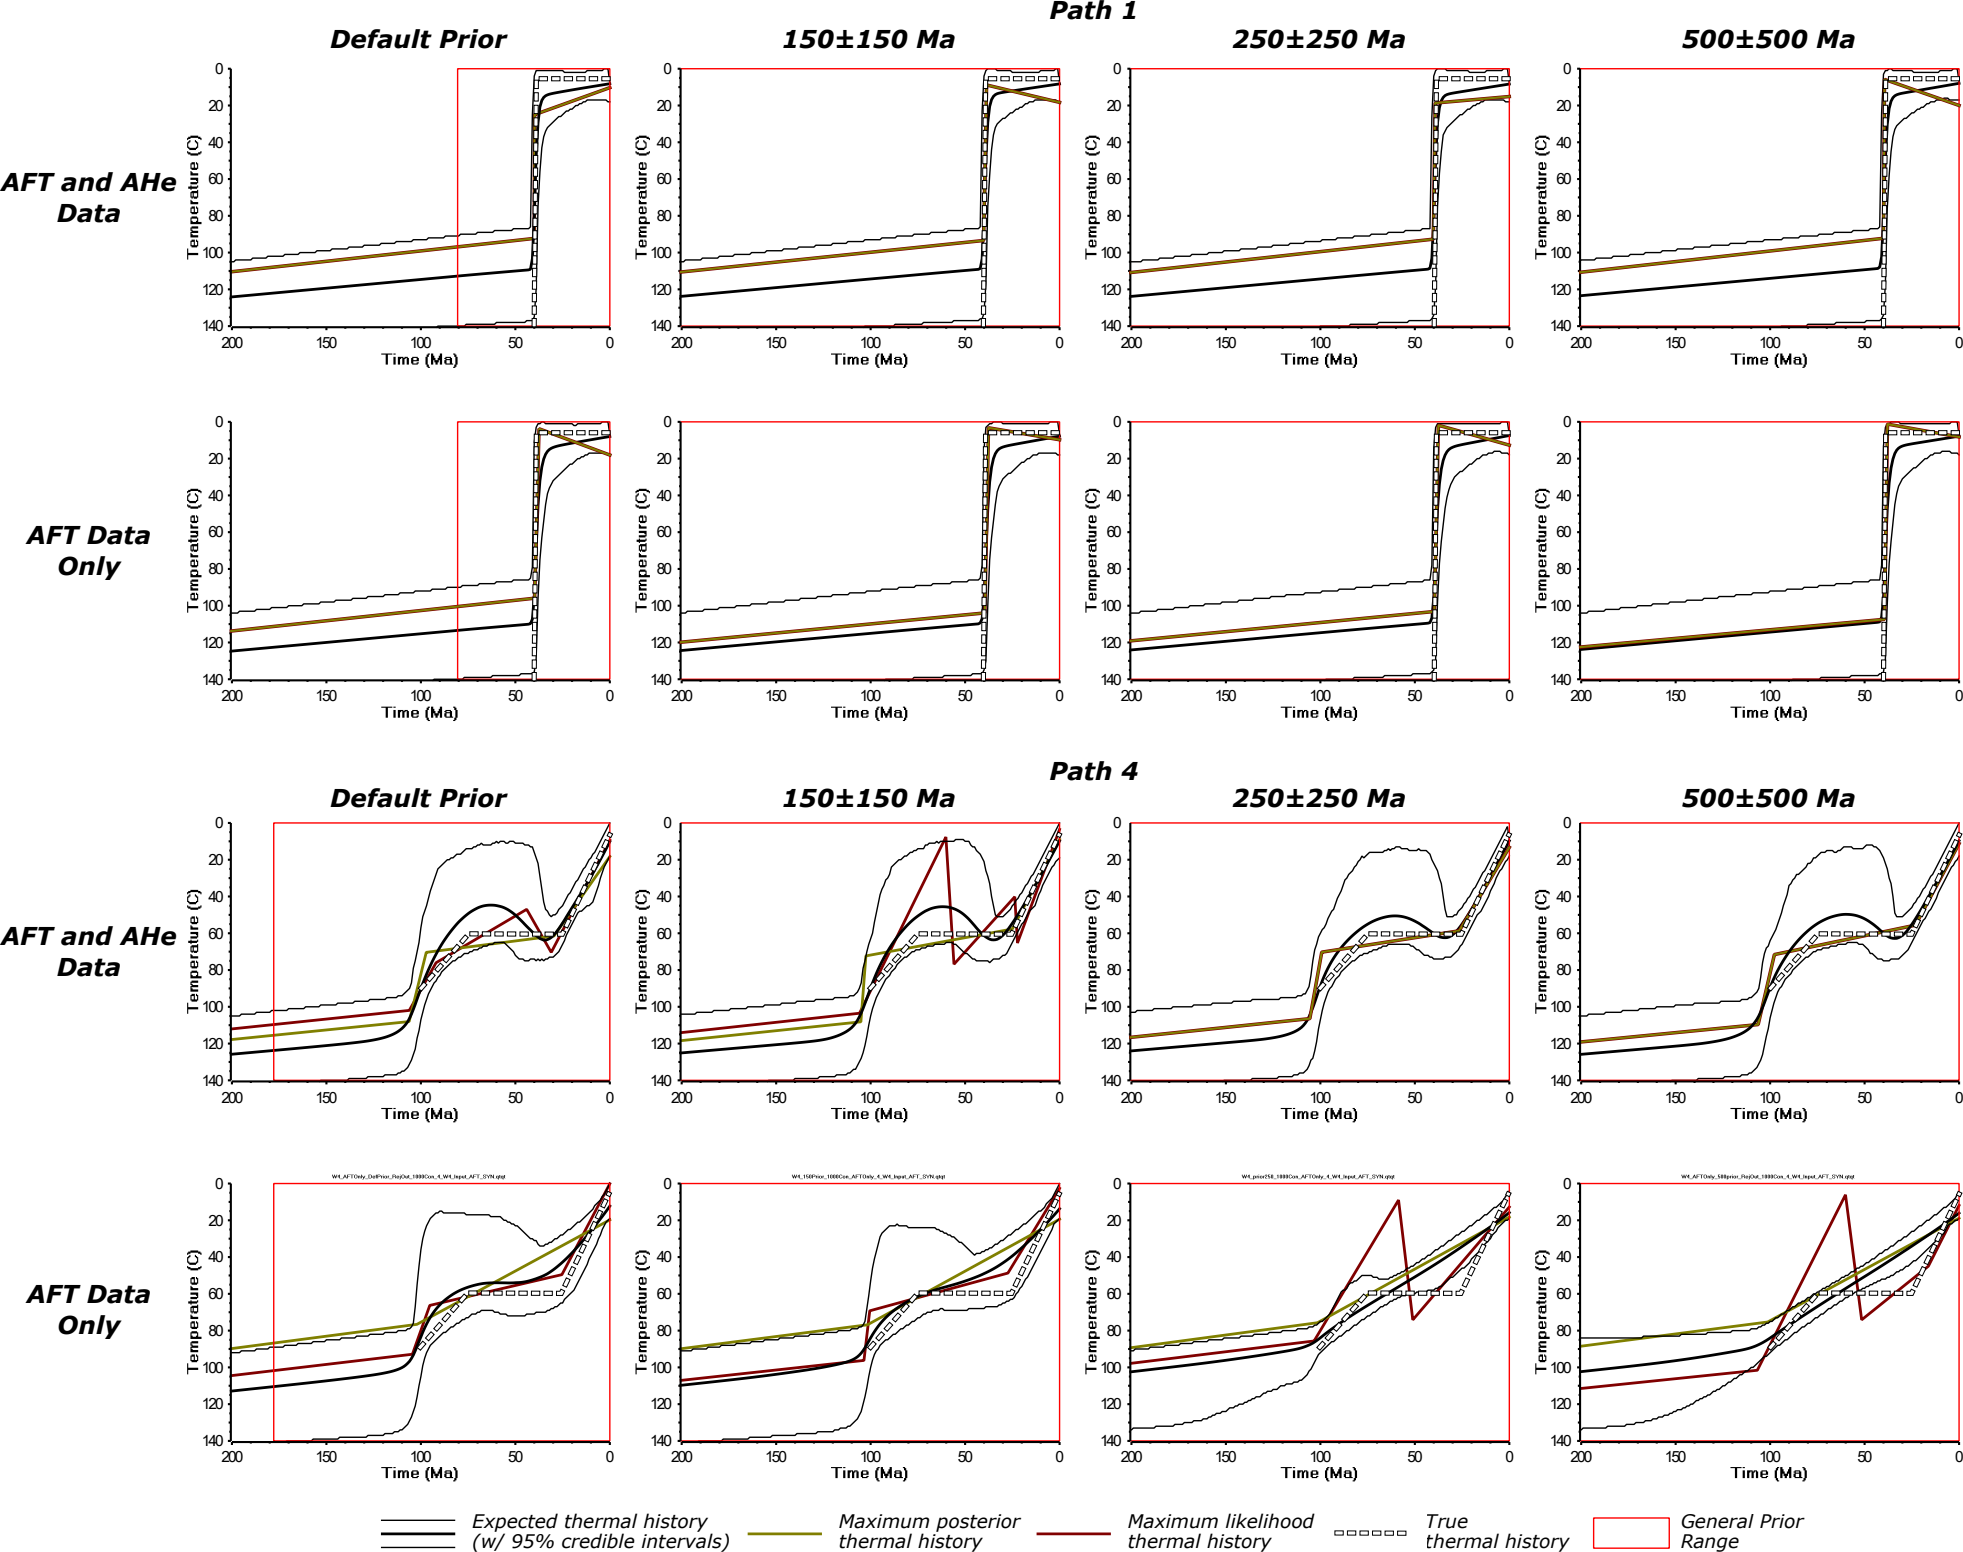

Path 1

AFT and AHe data joint model  
Expected TH

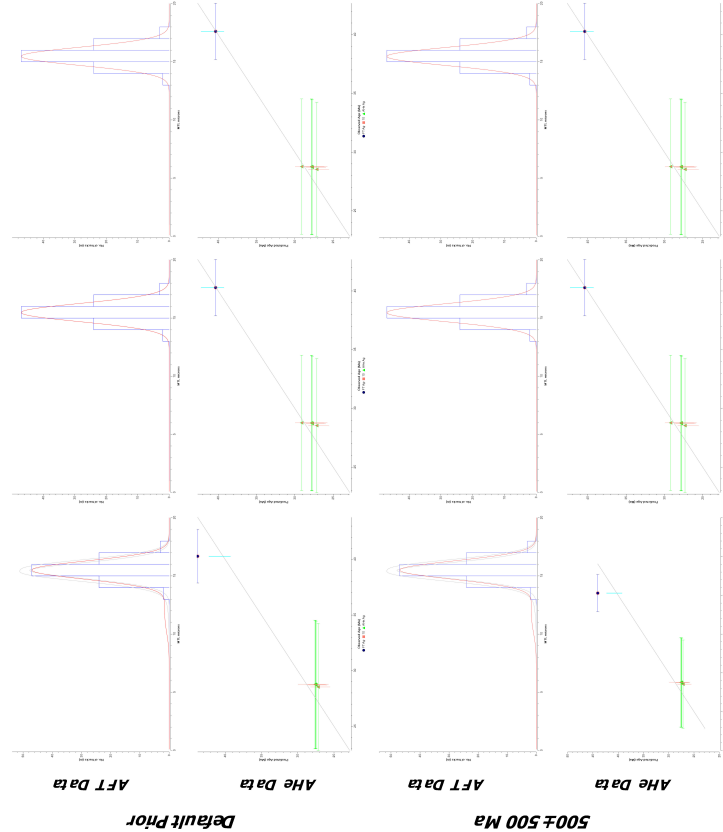

Max. Like. TH

Max. Post. TH

AFT only model  
Expected TH

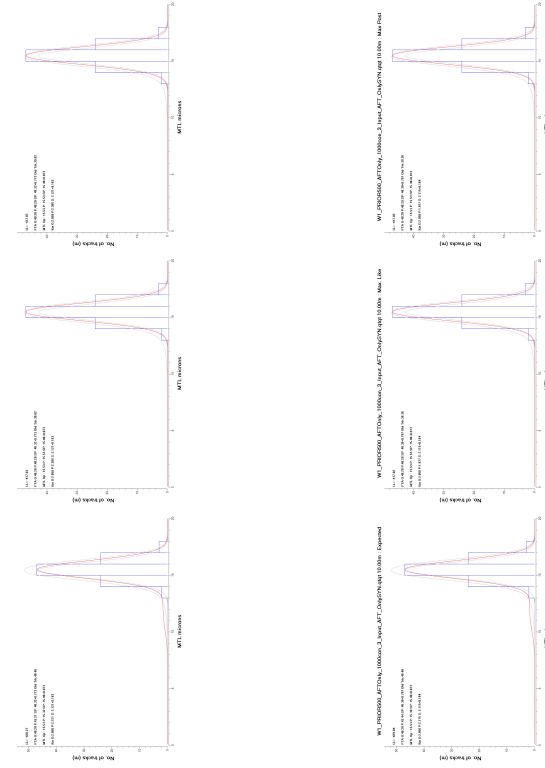

Max. Like. TH

Max. Post. TH

Path 4

AFT and AHe data joint model  
Expected TH

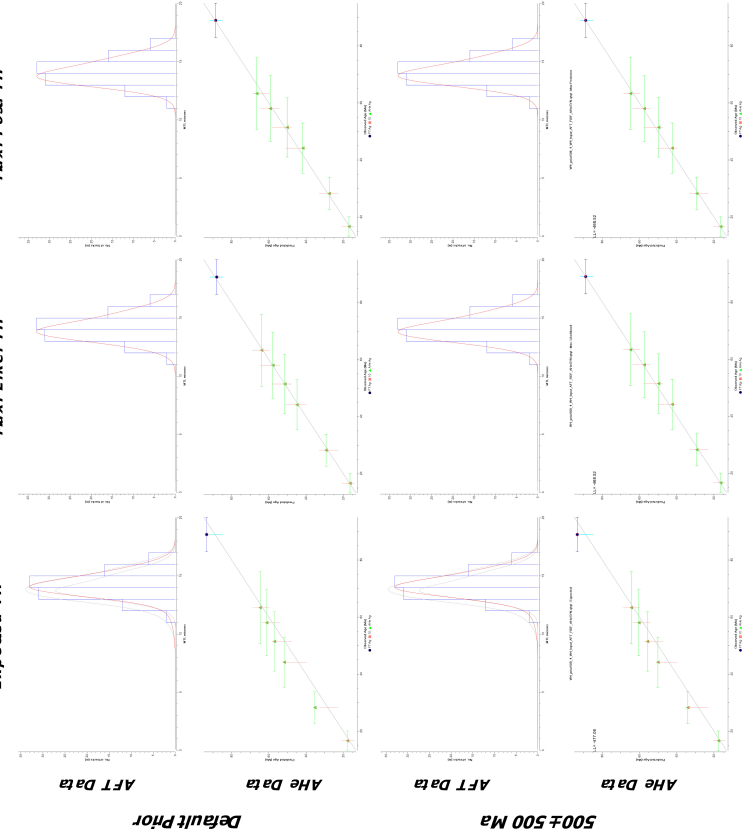

Max. Like. TH

Max. Post. TH

AFT only model  
Expected TH

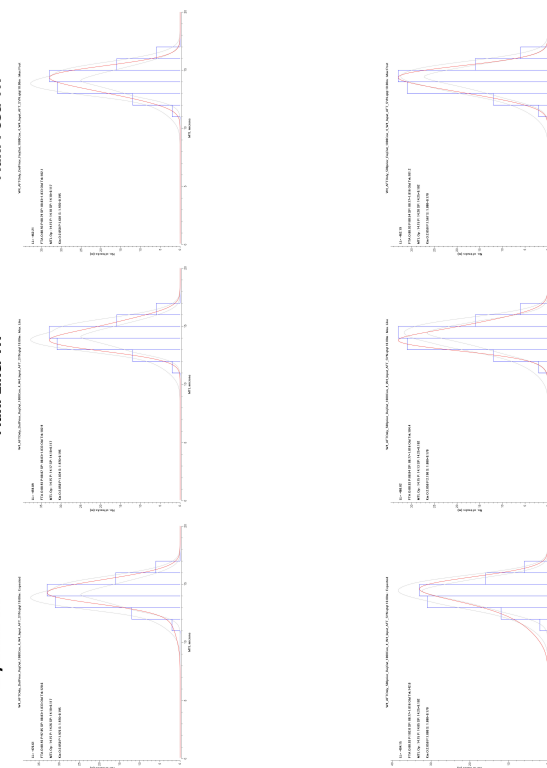

Max. Like. TH

Max. Post. TH



No constraint box

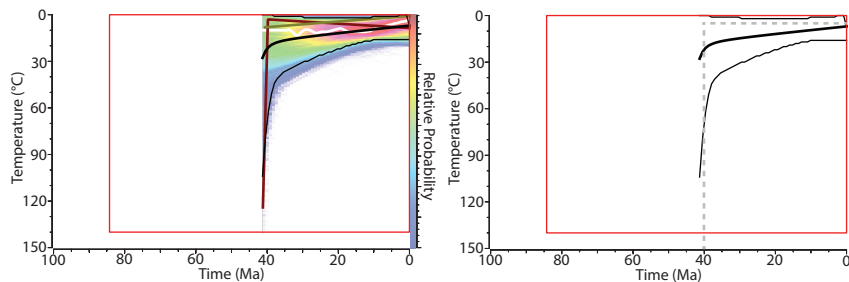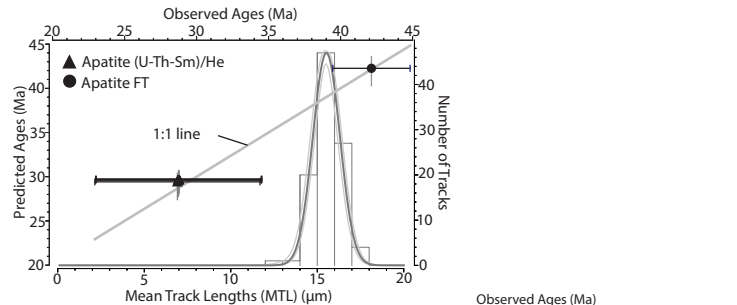

Constrain timing:  
 $200 \pm 5$  Ma

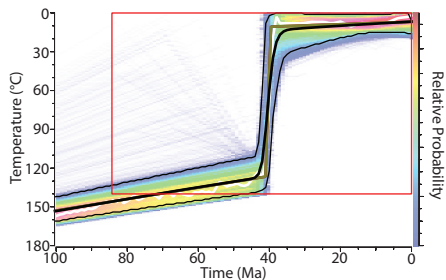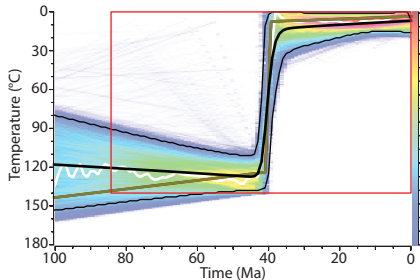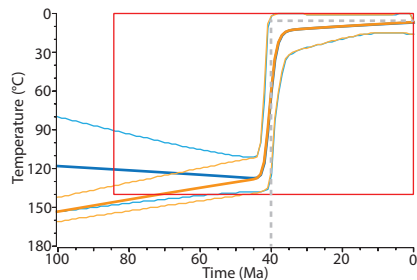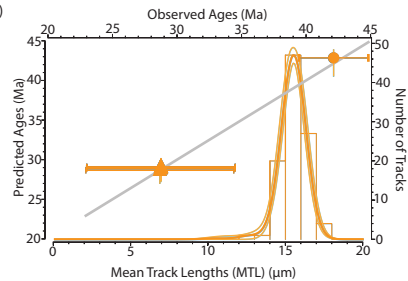

Constrain timing:  
 $500 \pm 5$  Ma

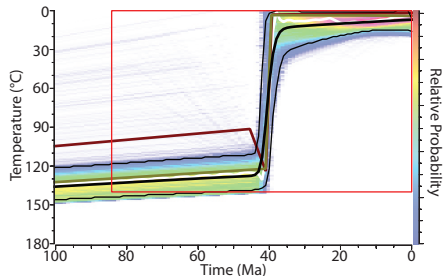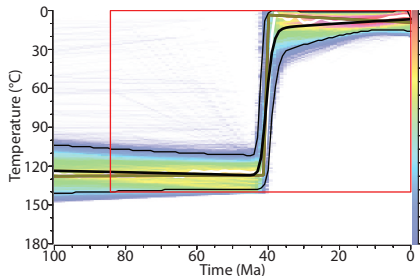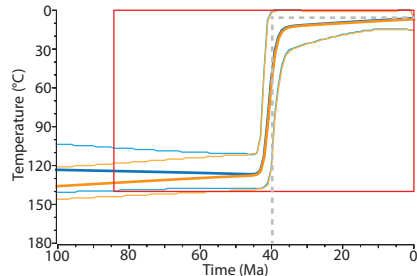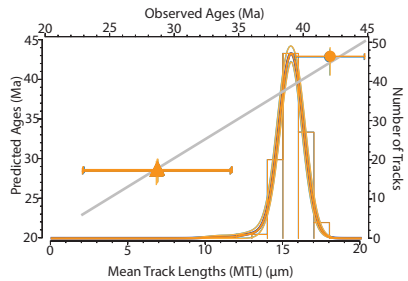

Constrain timing:  
 $1000 \pm 5$  Ma

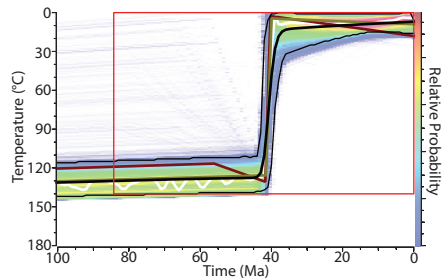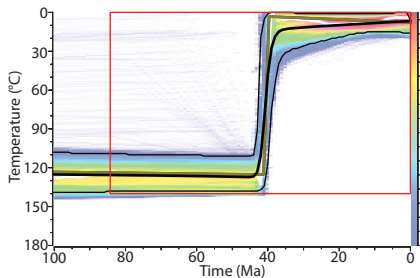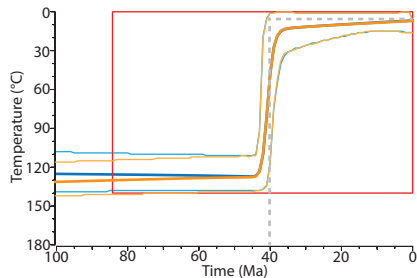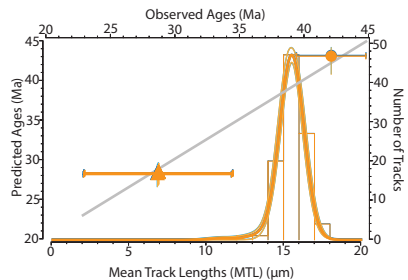

Tight temperature constraint  
( $200 \pm 5^\circ\text{C}$ )

Expanded temperature constraint  
( $100 \pm 100^\circ\text{C}$ )

Expanded temperature constraint ( $100 \pm 100^\circ\text{C}$ )  
Tight temperature constraint ( $200 \pm 5^\circ\text{C}$ )

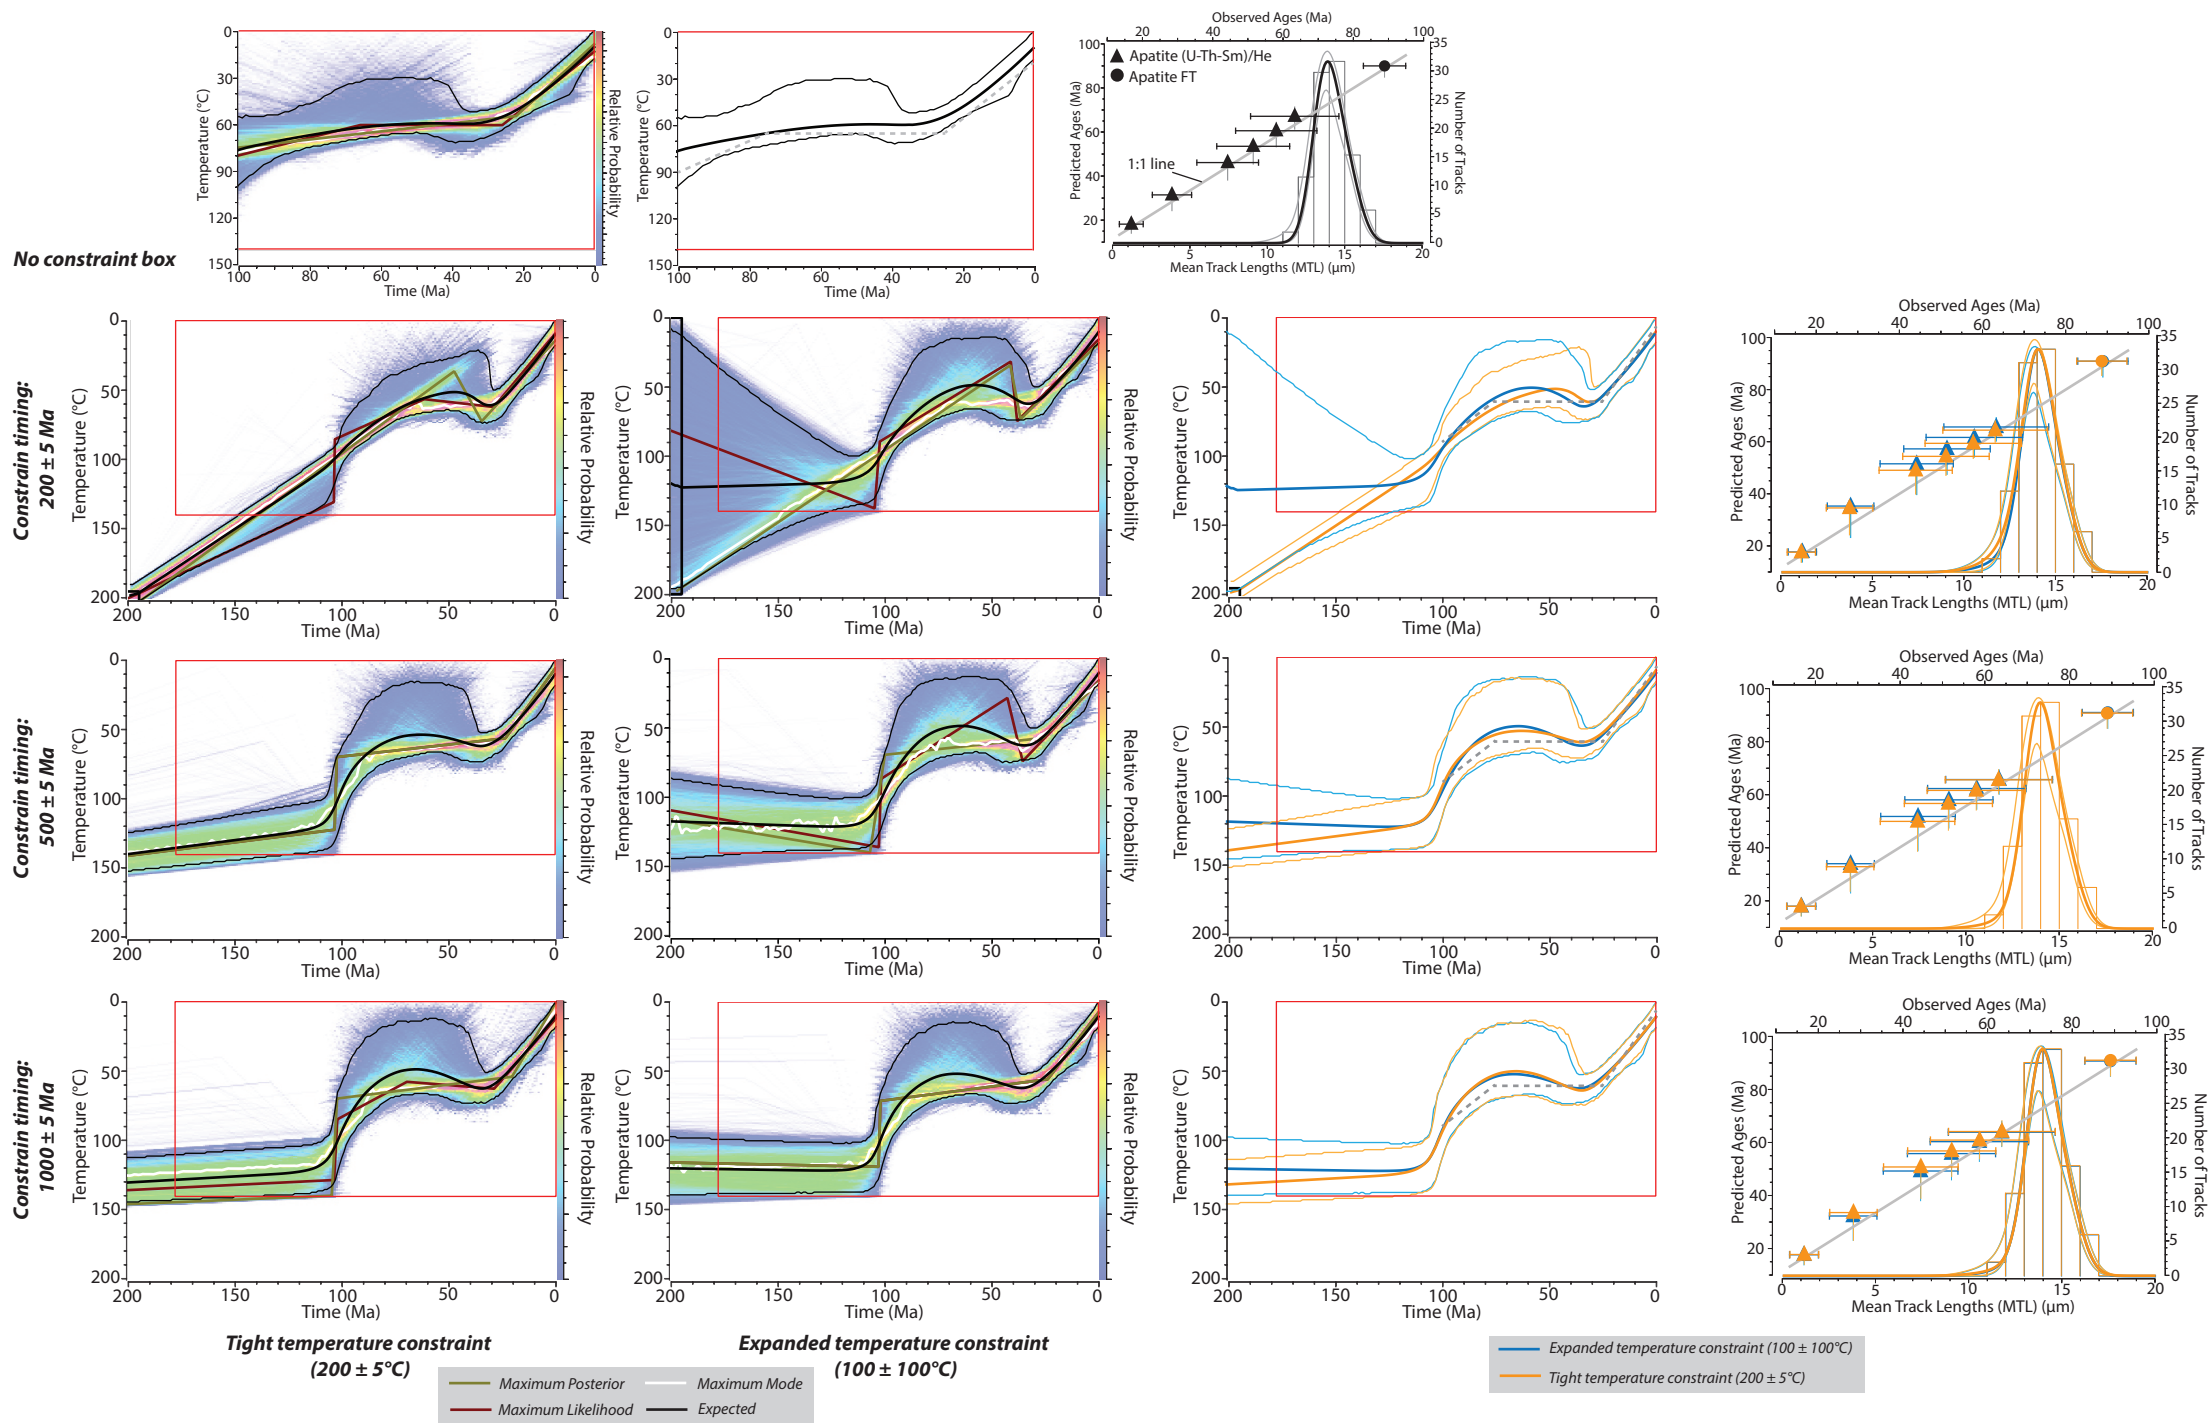

Supplement: Supplementary file 82 [file 1]
