# Supplementary material
Source: publisher figshare collection journal article supplement (https://gsapubs.figshare.com/articles/dataset/_/21538512)
Supplement: Supplementary file 3 [file 1]

# Exercise4\_GROUPD-2\_3\_Exercise4\_InputData.txt : Max Posterior

Predicted Age (Ma)

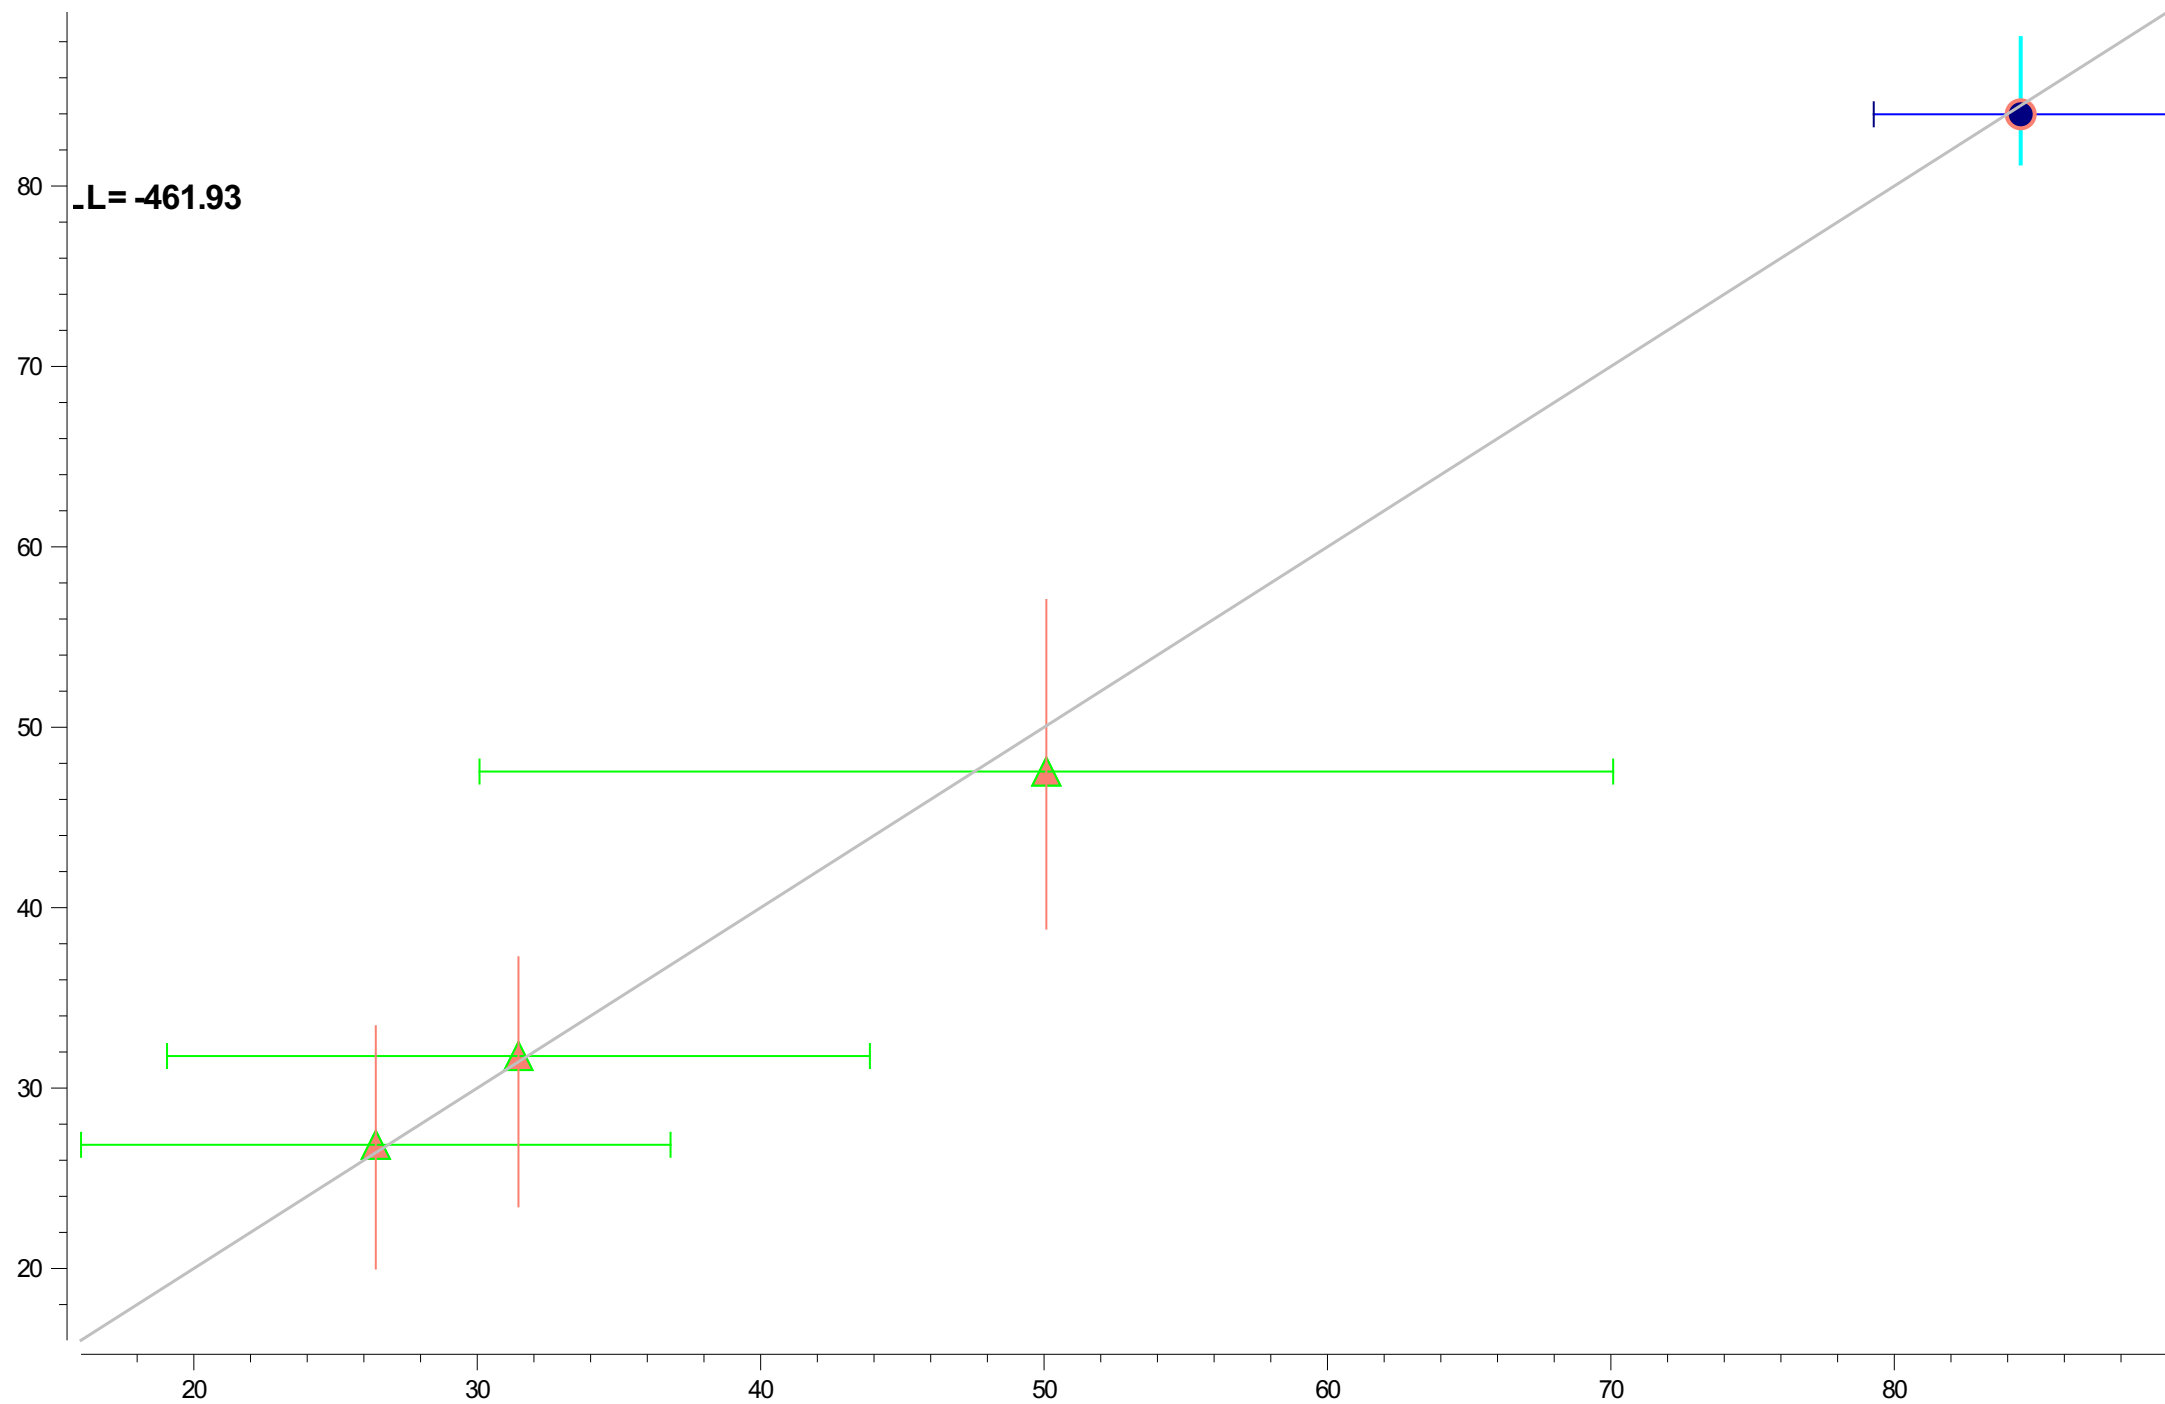

Observed Age (Ma)

● FTAge ■ 10 ▲ AHe Age
