# Supplementary material
Source: publisher figshare collection journal article supplement (https://gsapubs.figshare.com/articles/dataset/_/21538512)
Supplement: Supplementary file 20 [file 1]

# Exercise4\_GROUPA-2\_3\_Exercise4\_InputData.txt

Temperature (C)

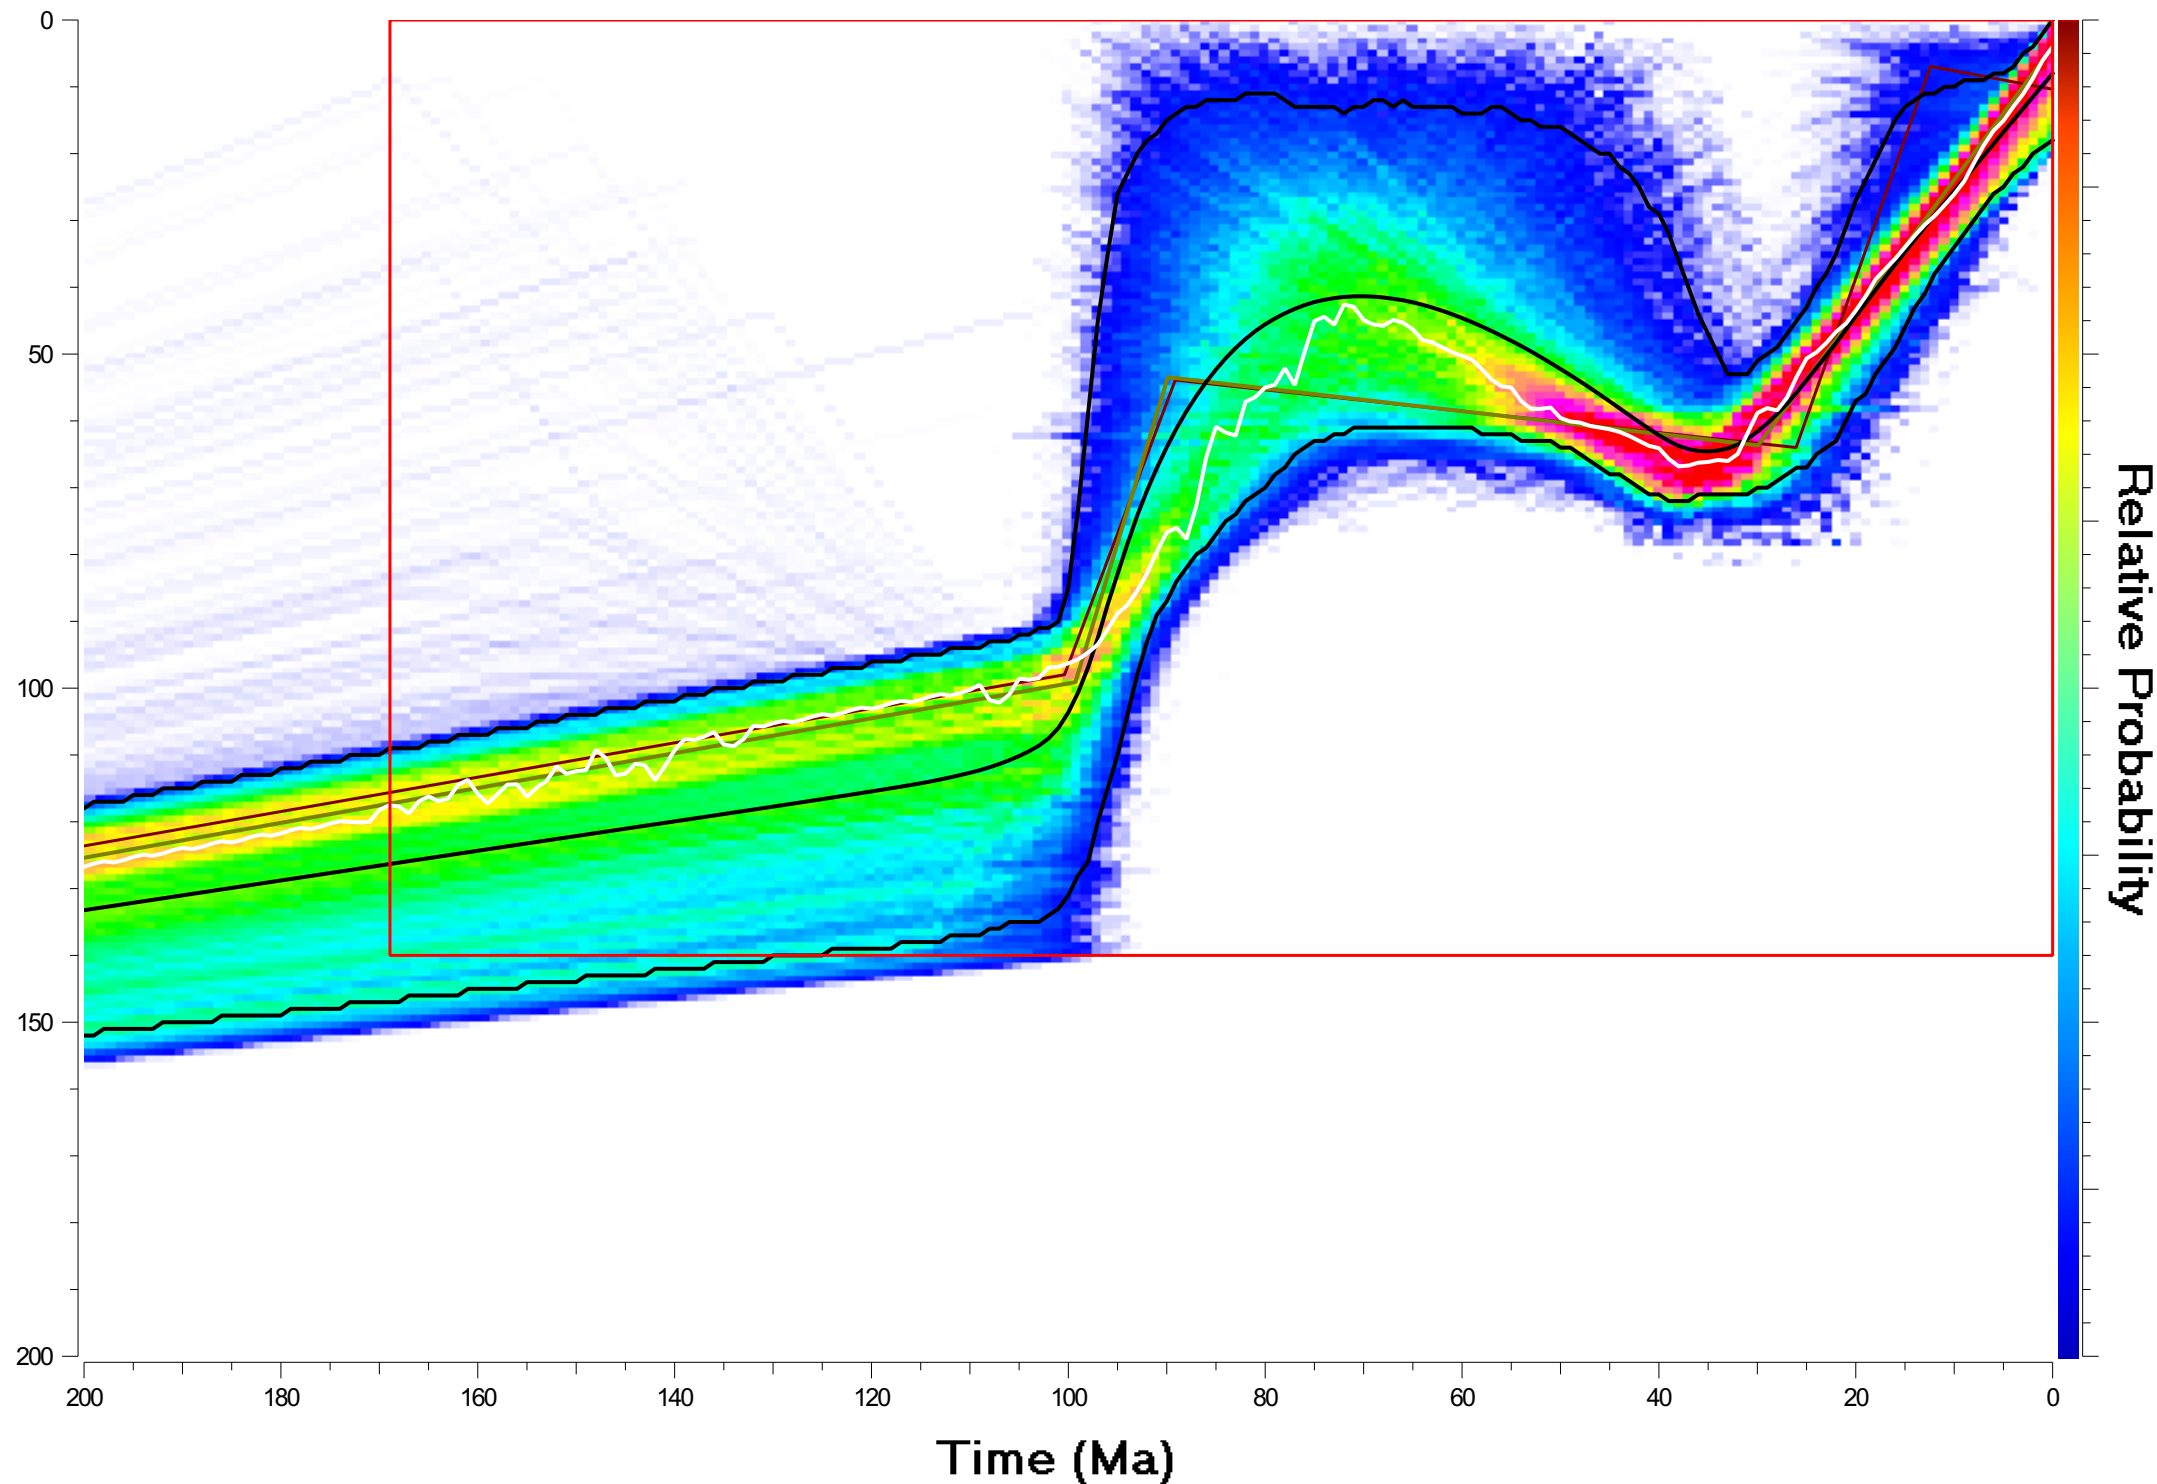

Relative Probability

— Max Like. Model — Max. Post. Model — Expected Model — Max. Mbde Model
