# Supplementary material
Source: publisher figshare collection journal article supplement (https://gsapubs.figshare.com/articles/dataset/_/21538512)
Supplement: Supplementary file 36 [file 1]

# Exercise4\_InputData\_UTHe\_only\_dataset2\_3

Log Likelihood

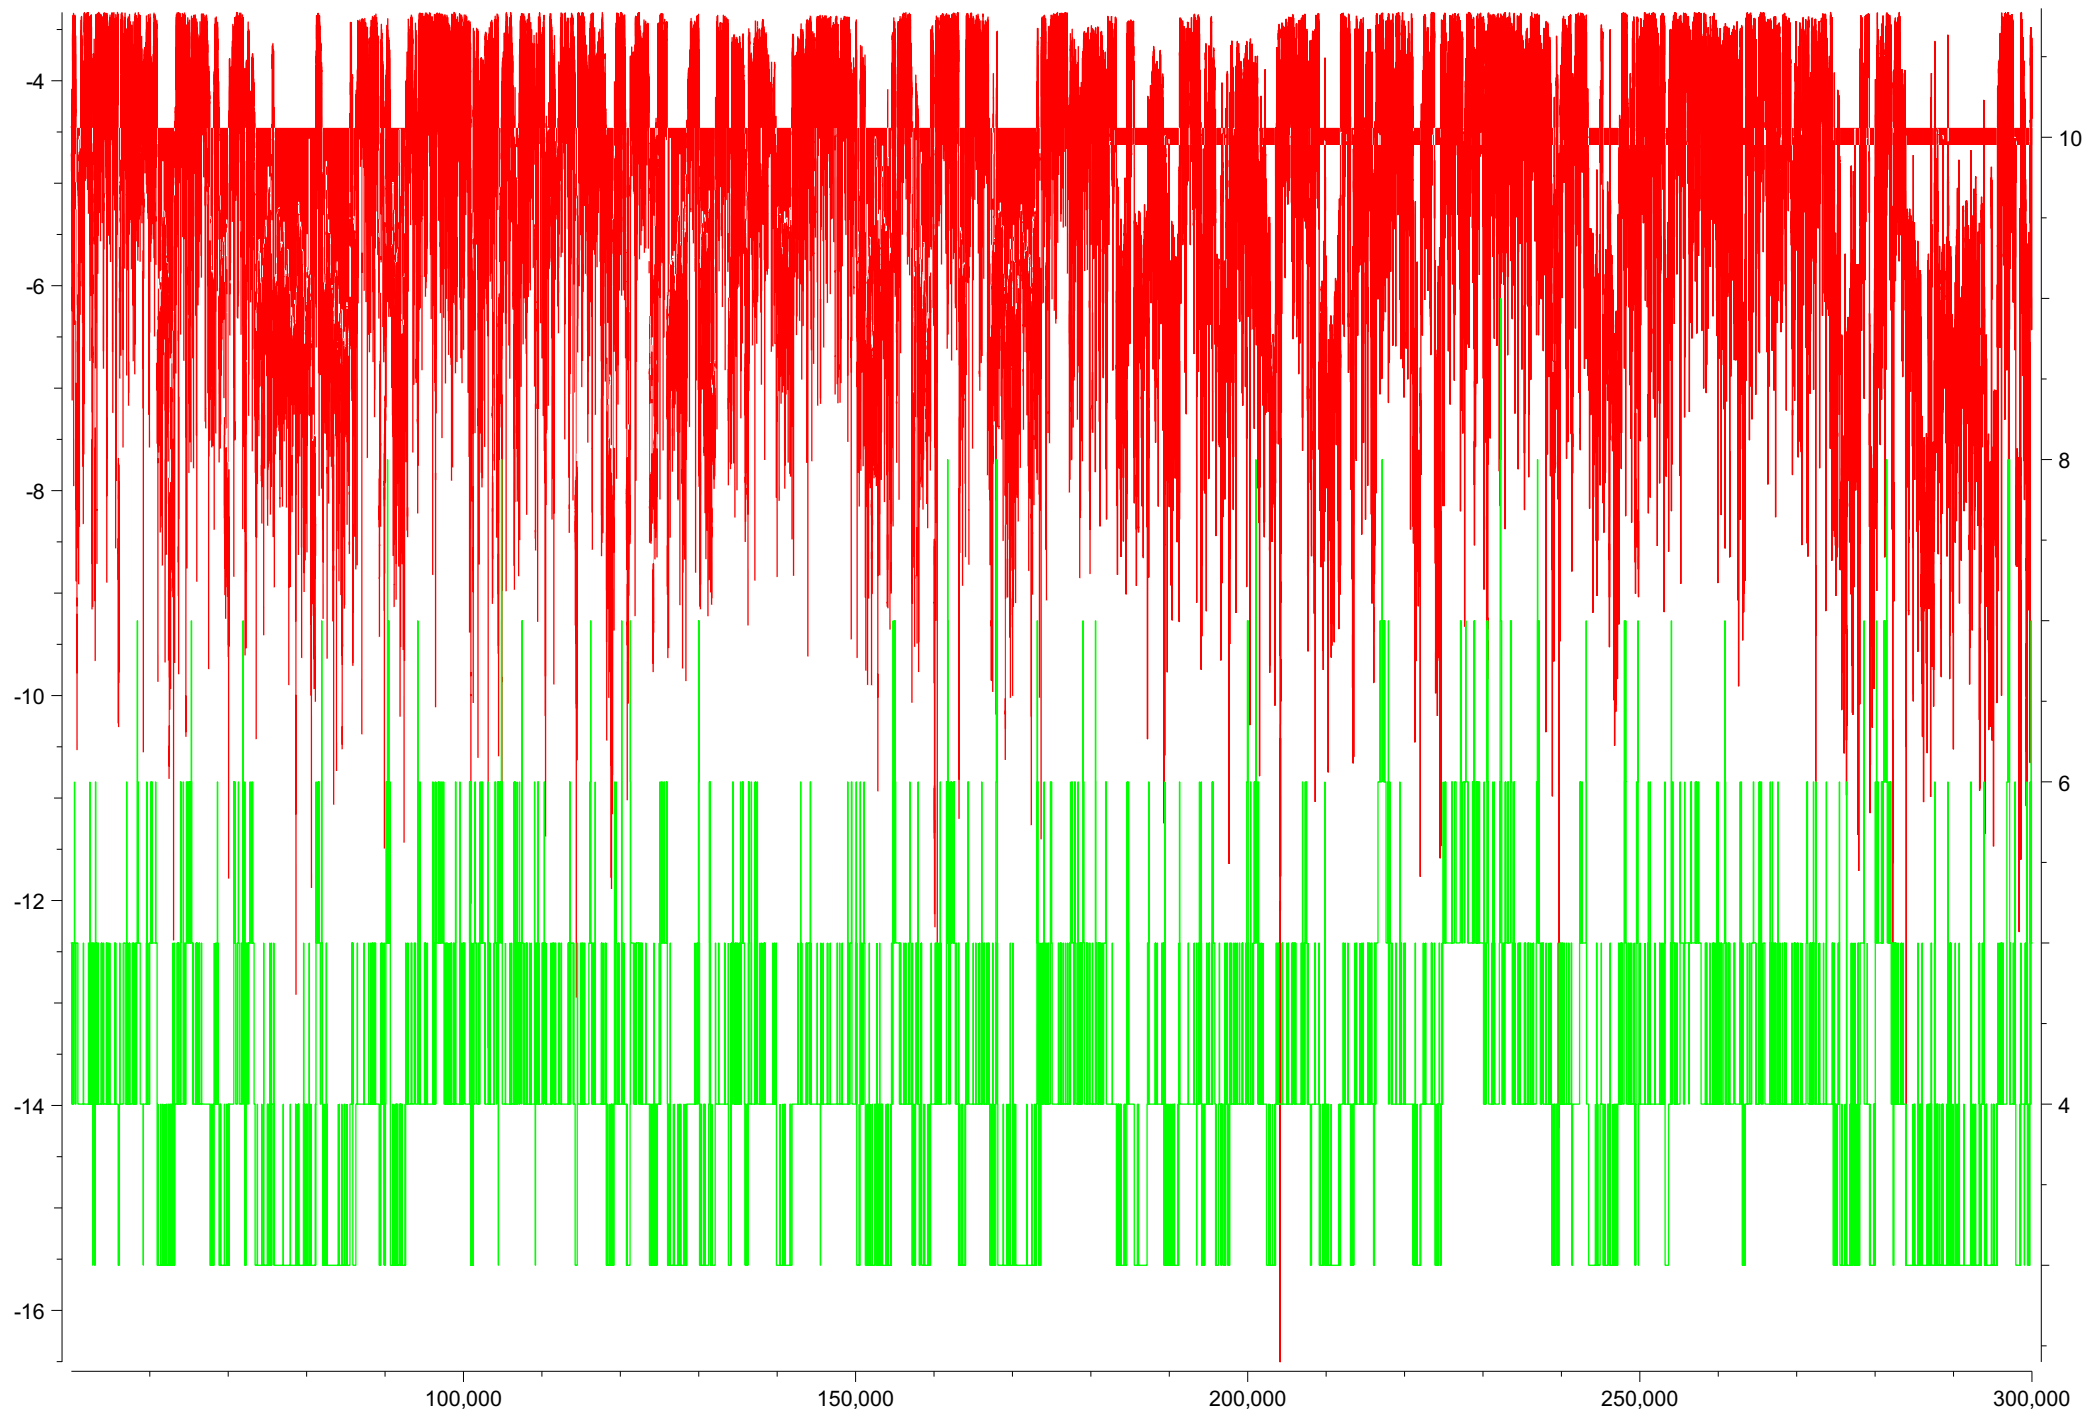

No. of T(t) points

Iteration

— Likelihood — No. of T(t) points
