# Supplementary material
Source: publisher figshare collection journal article supplement (https://gsapubs.figshare.com/articles/dataset/_/21538512)
Supplement: Supplementary file 37 [file 1]

# Exercise4\_GROUPC-1\_3\_Exercise4\_InputData\_UThHe\_only\_dataset1.txt : Max Posterior

Predicted Age (Ma)

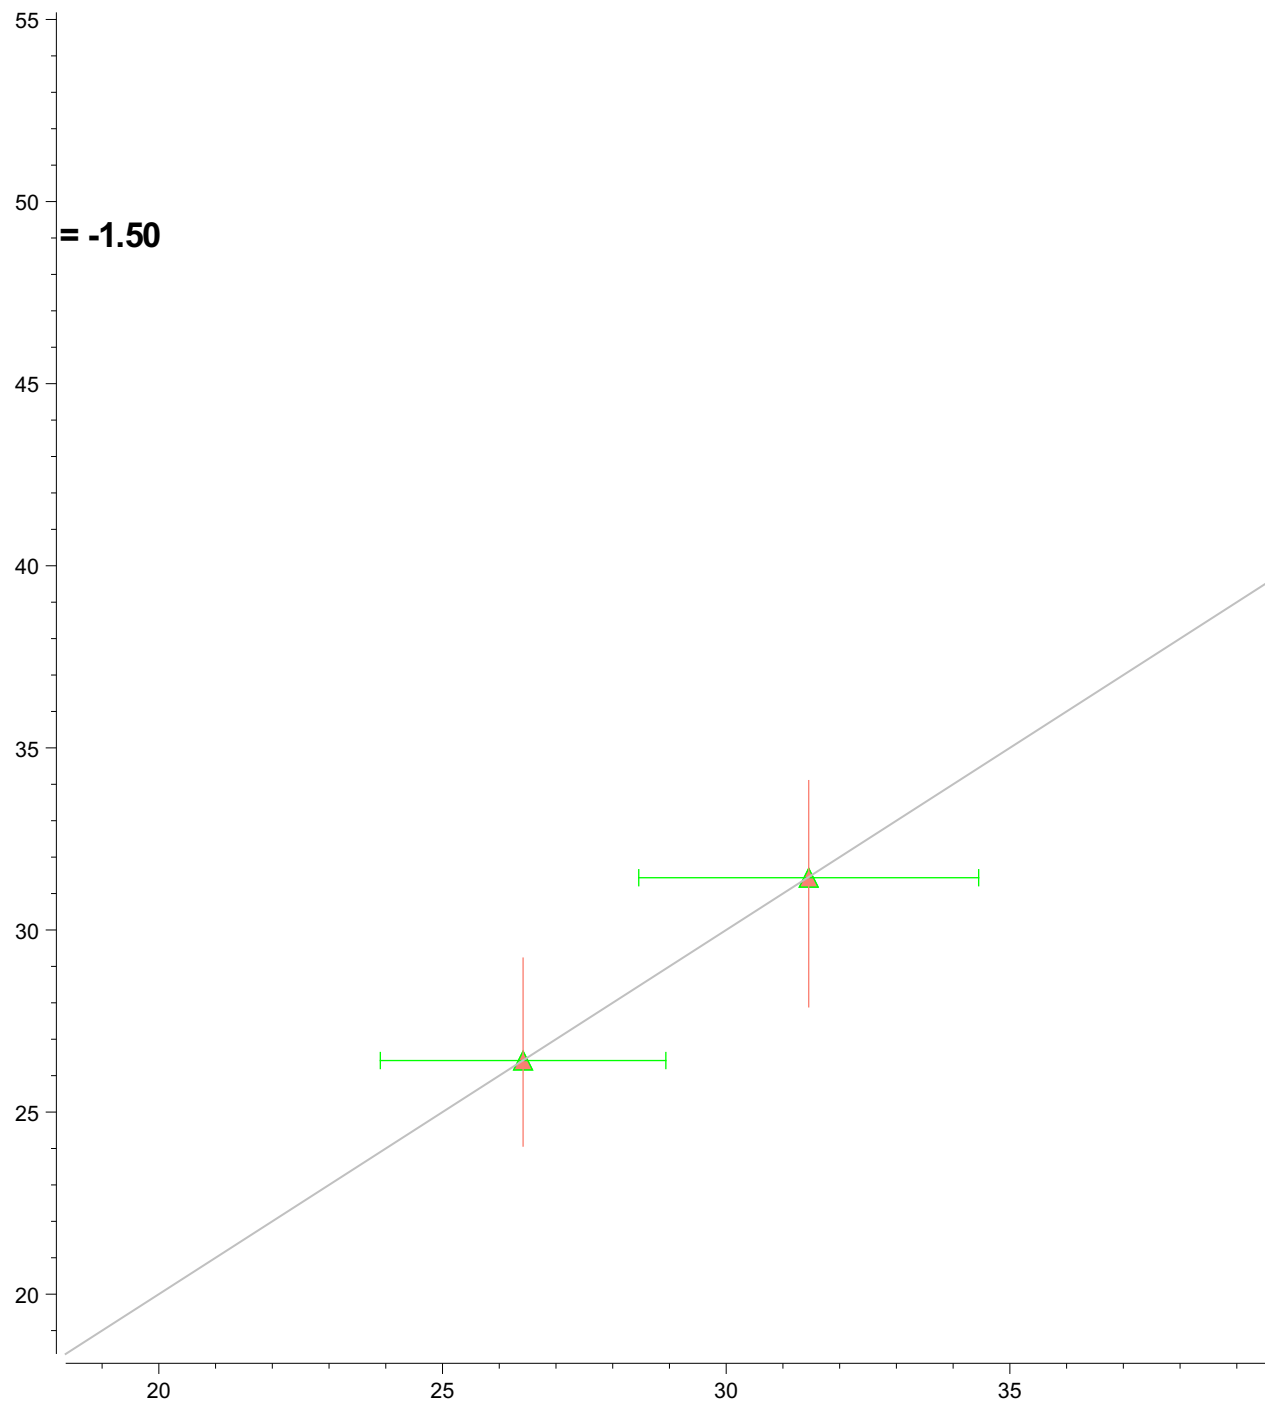

Observed Age (Ma)

▲ AHe Age ■ 10
