# Supplementary material
Source: publisher figshare collection journal article supplement (https://gsapubs.figshare.com/articles/dataset/_/21538512)

# Exercise4\_GROUPA-2\_3\_Exercise4\_InputData.txt 10.00m : Max. Like

No. of tracks (m)

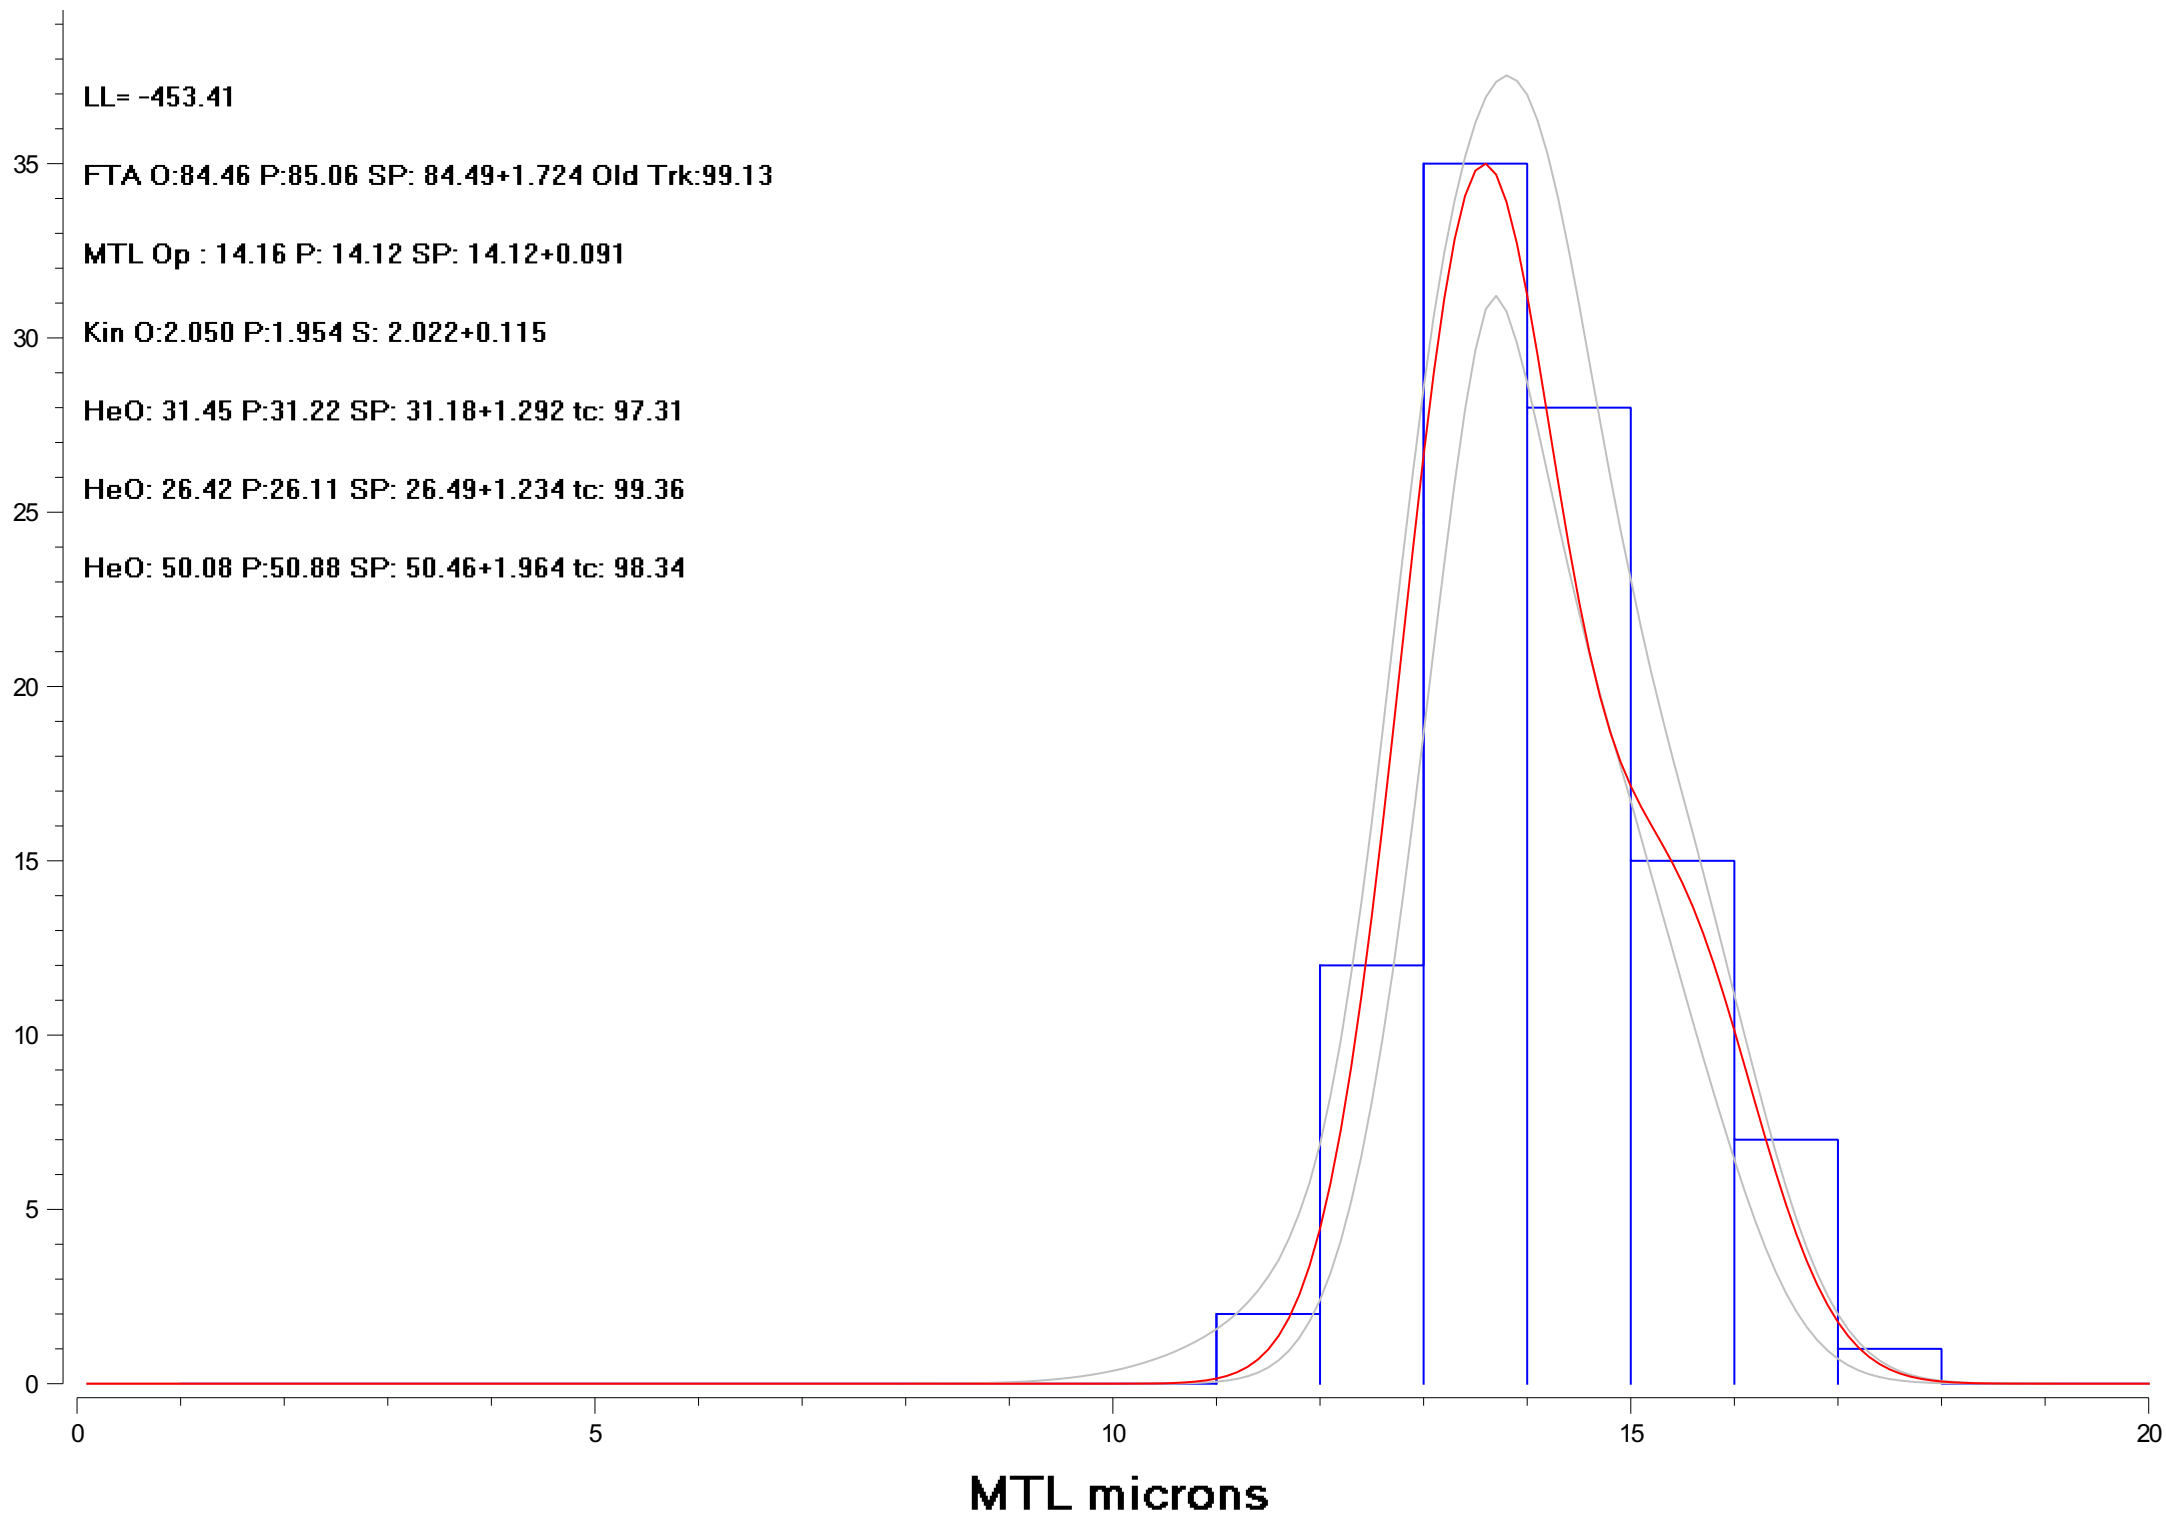

Supplement: Supplementary file 1 [file 1]

# Exercise3\_IM\_4 : Max Like

Time (Ma)

Temperature (C)

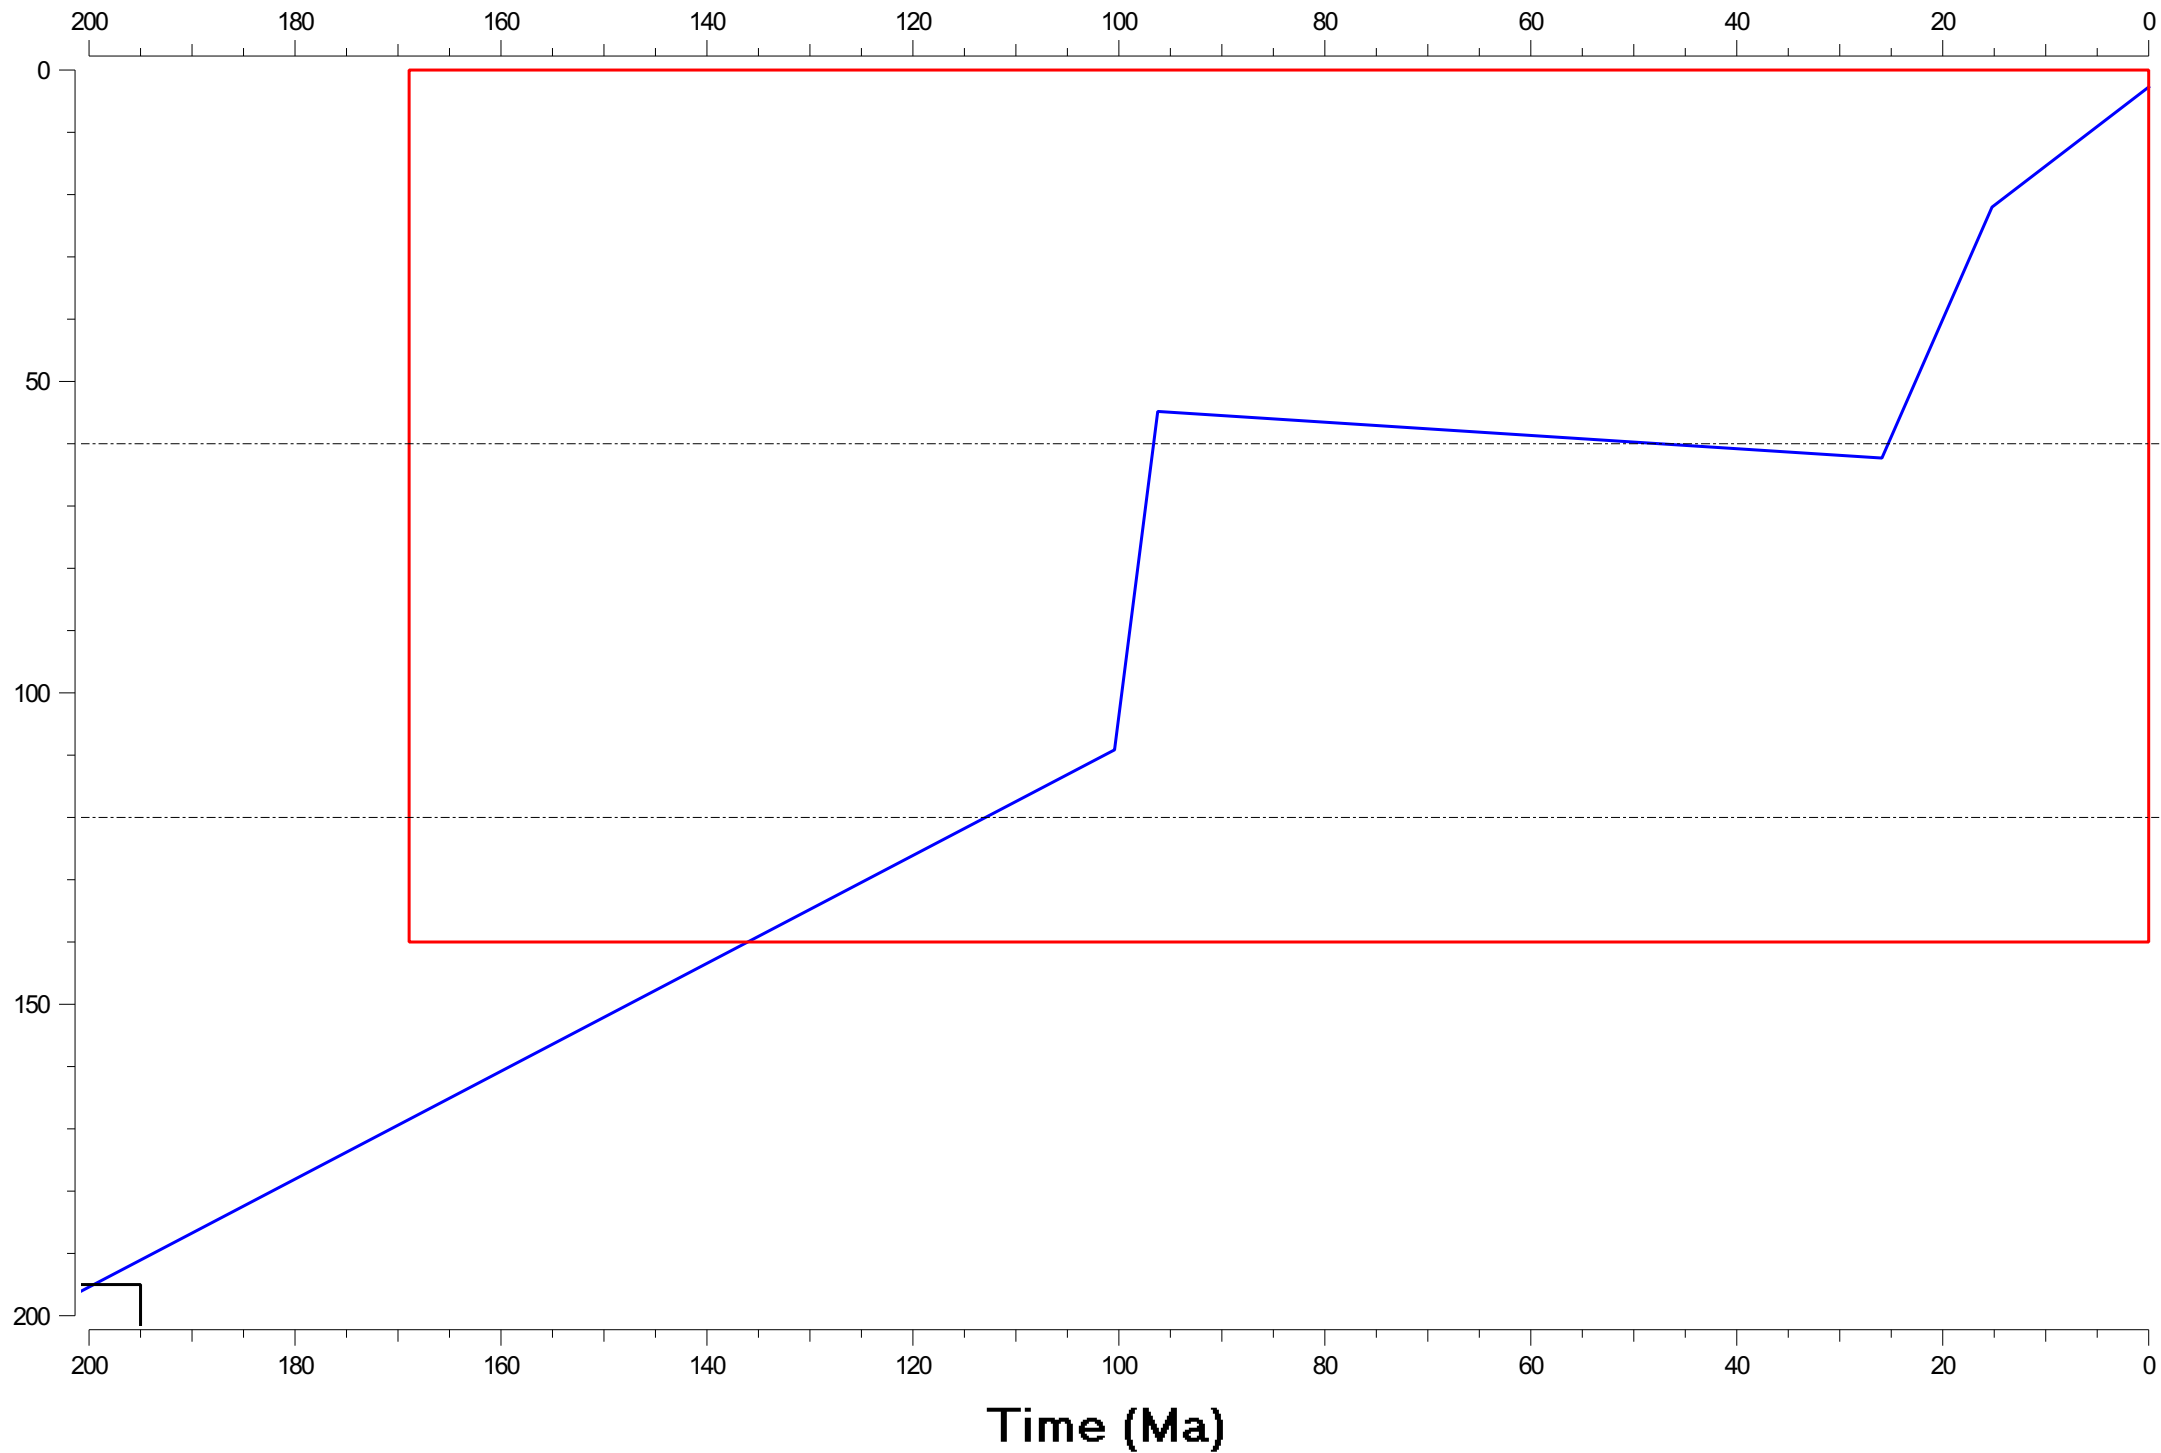

Supplement: Supplementary file 2 [file 1]

# Exercise4\_GROUPB-2\_3

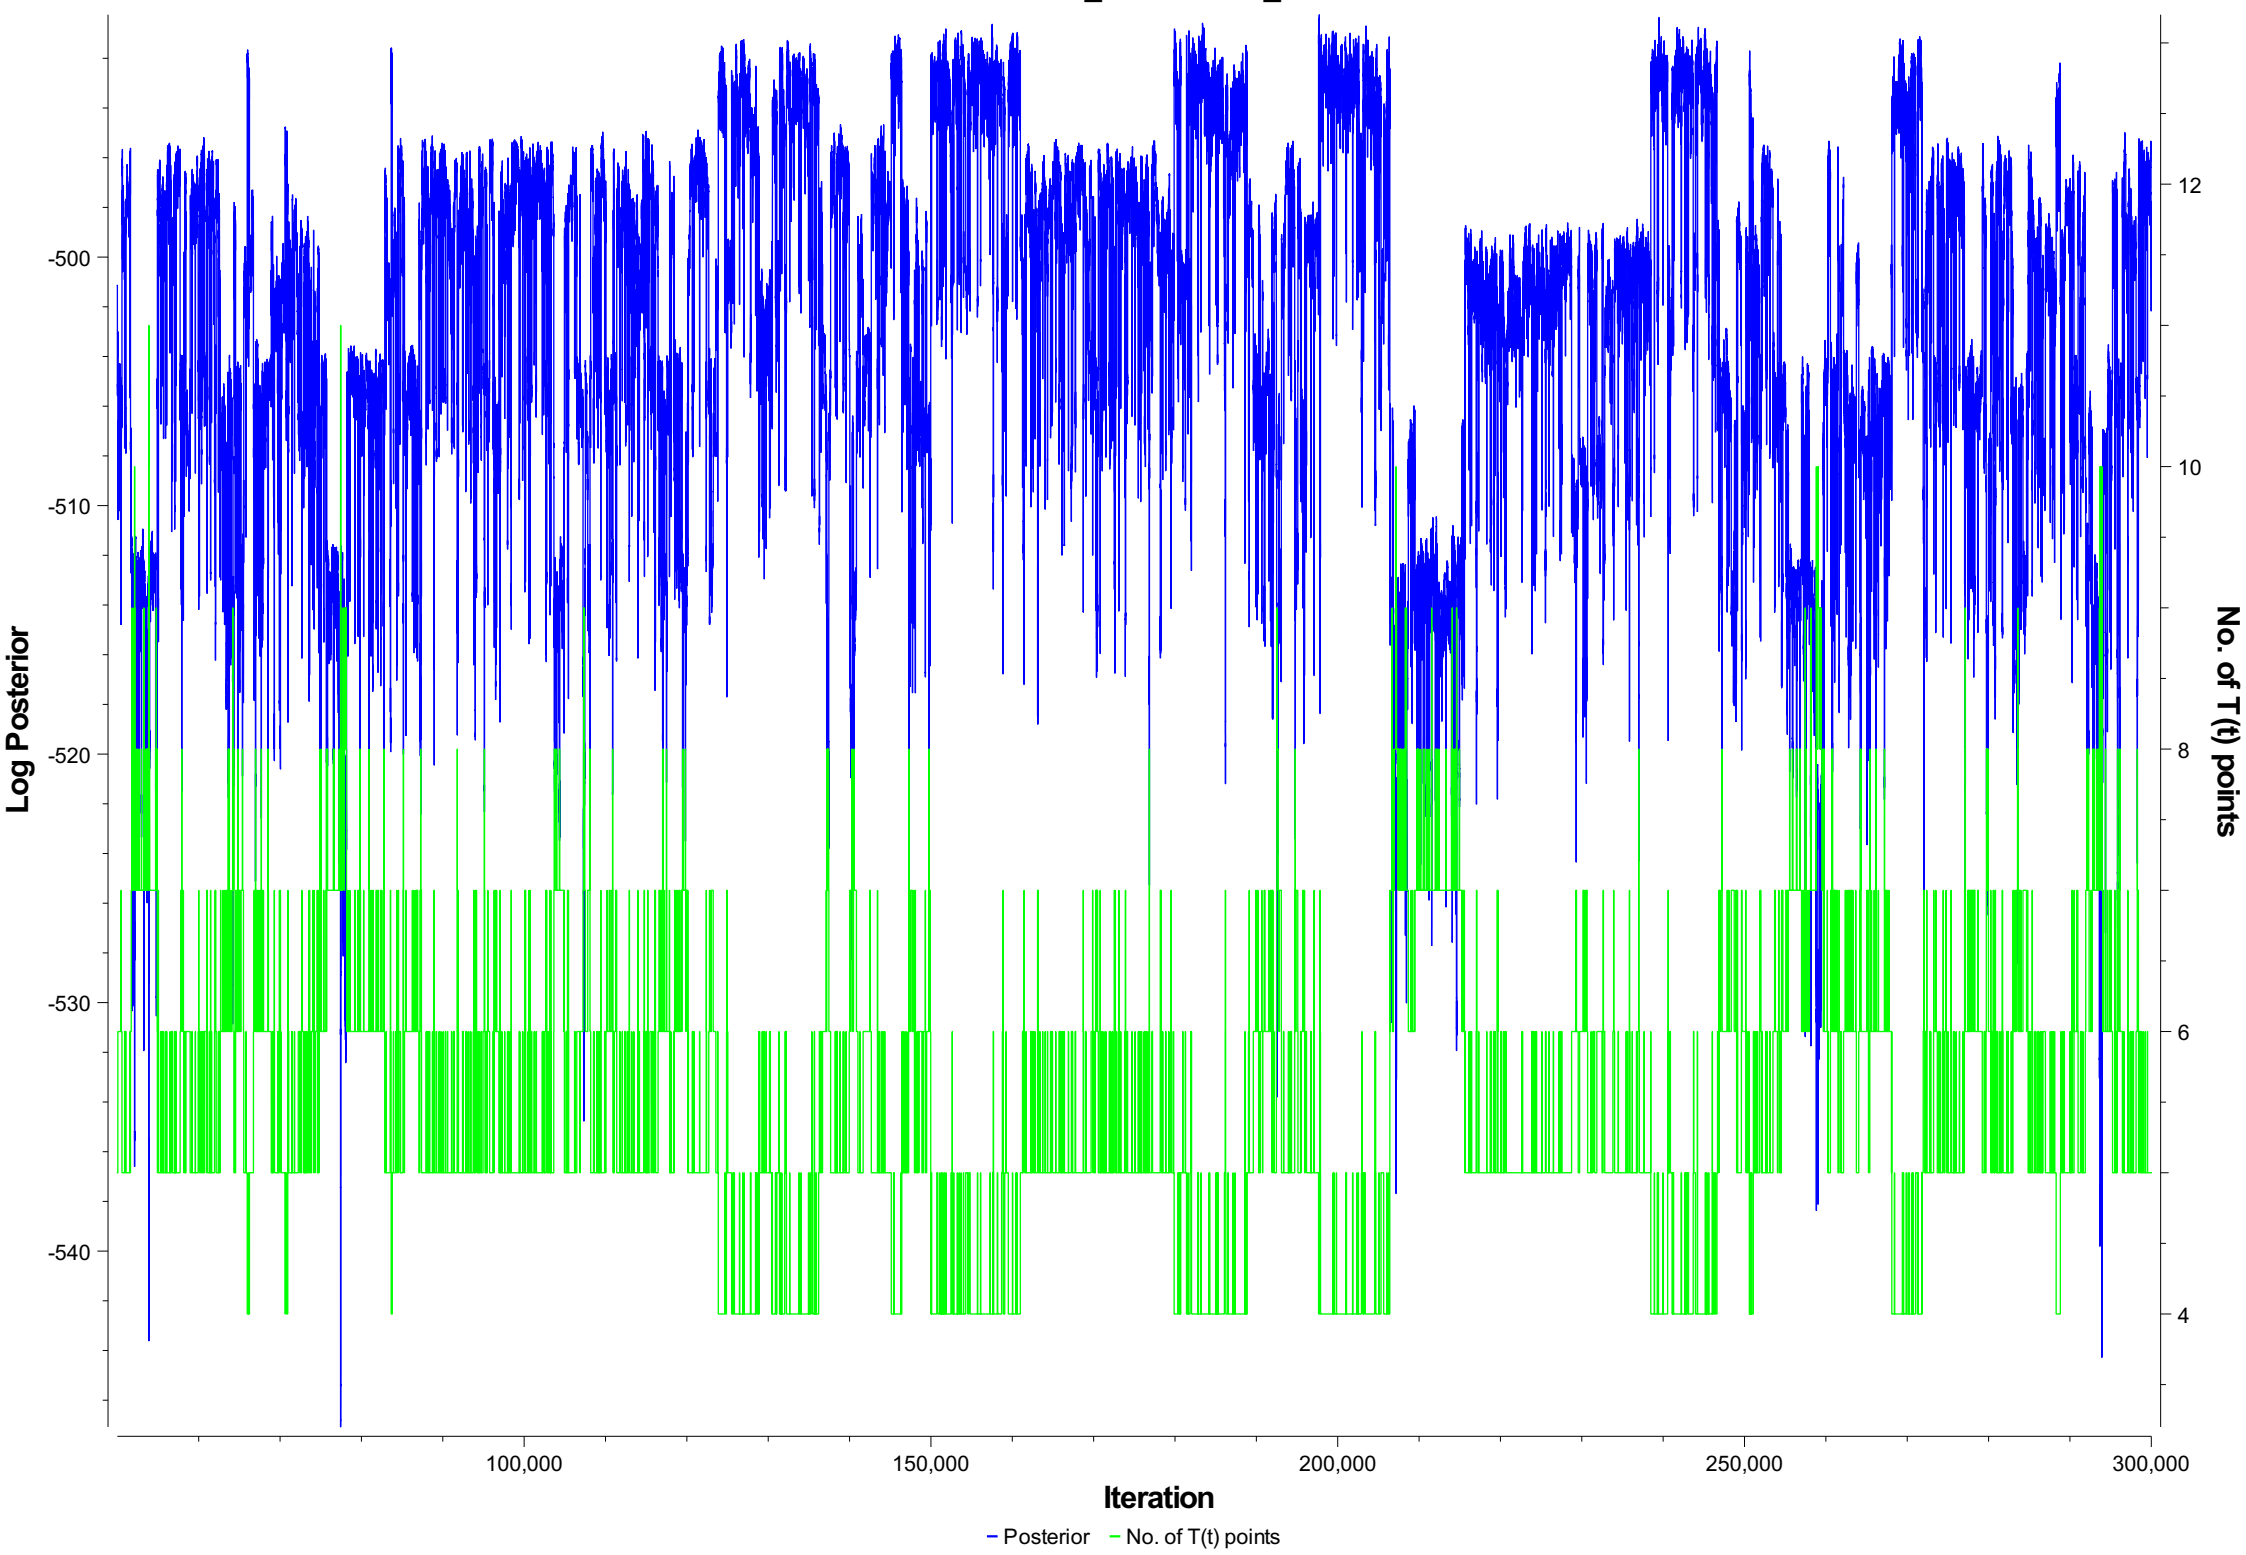

Supplement: Supplementary file 4 [file 1]

# Exercise4\_GROUPA-2\_3\_Exercise4\_InputData.txt : Max Posterior

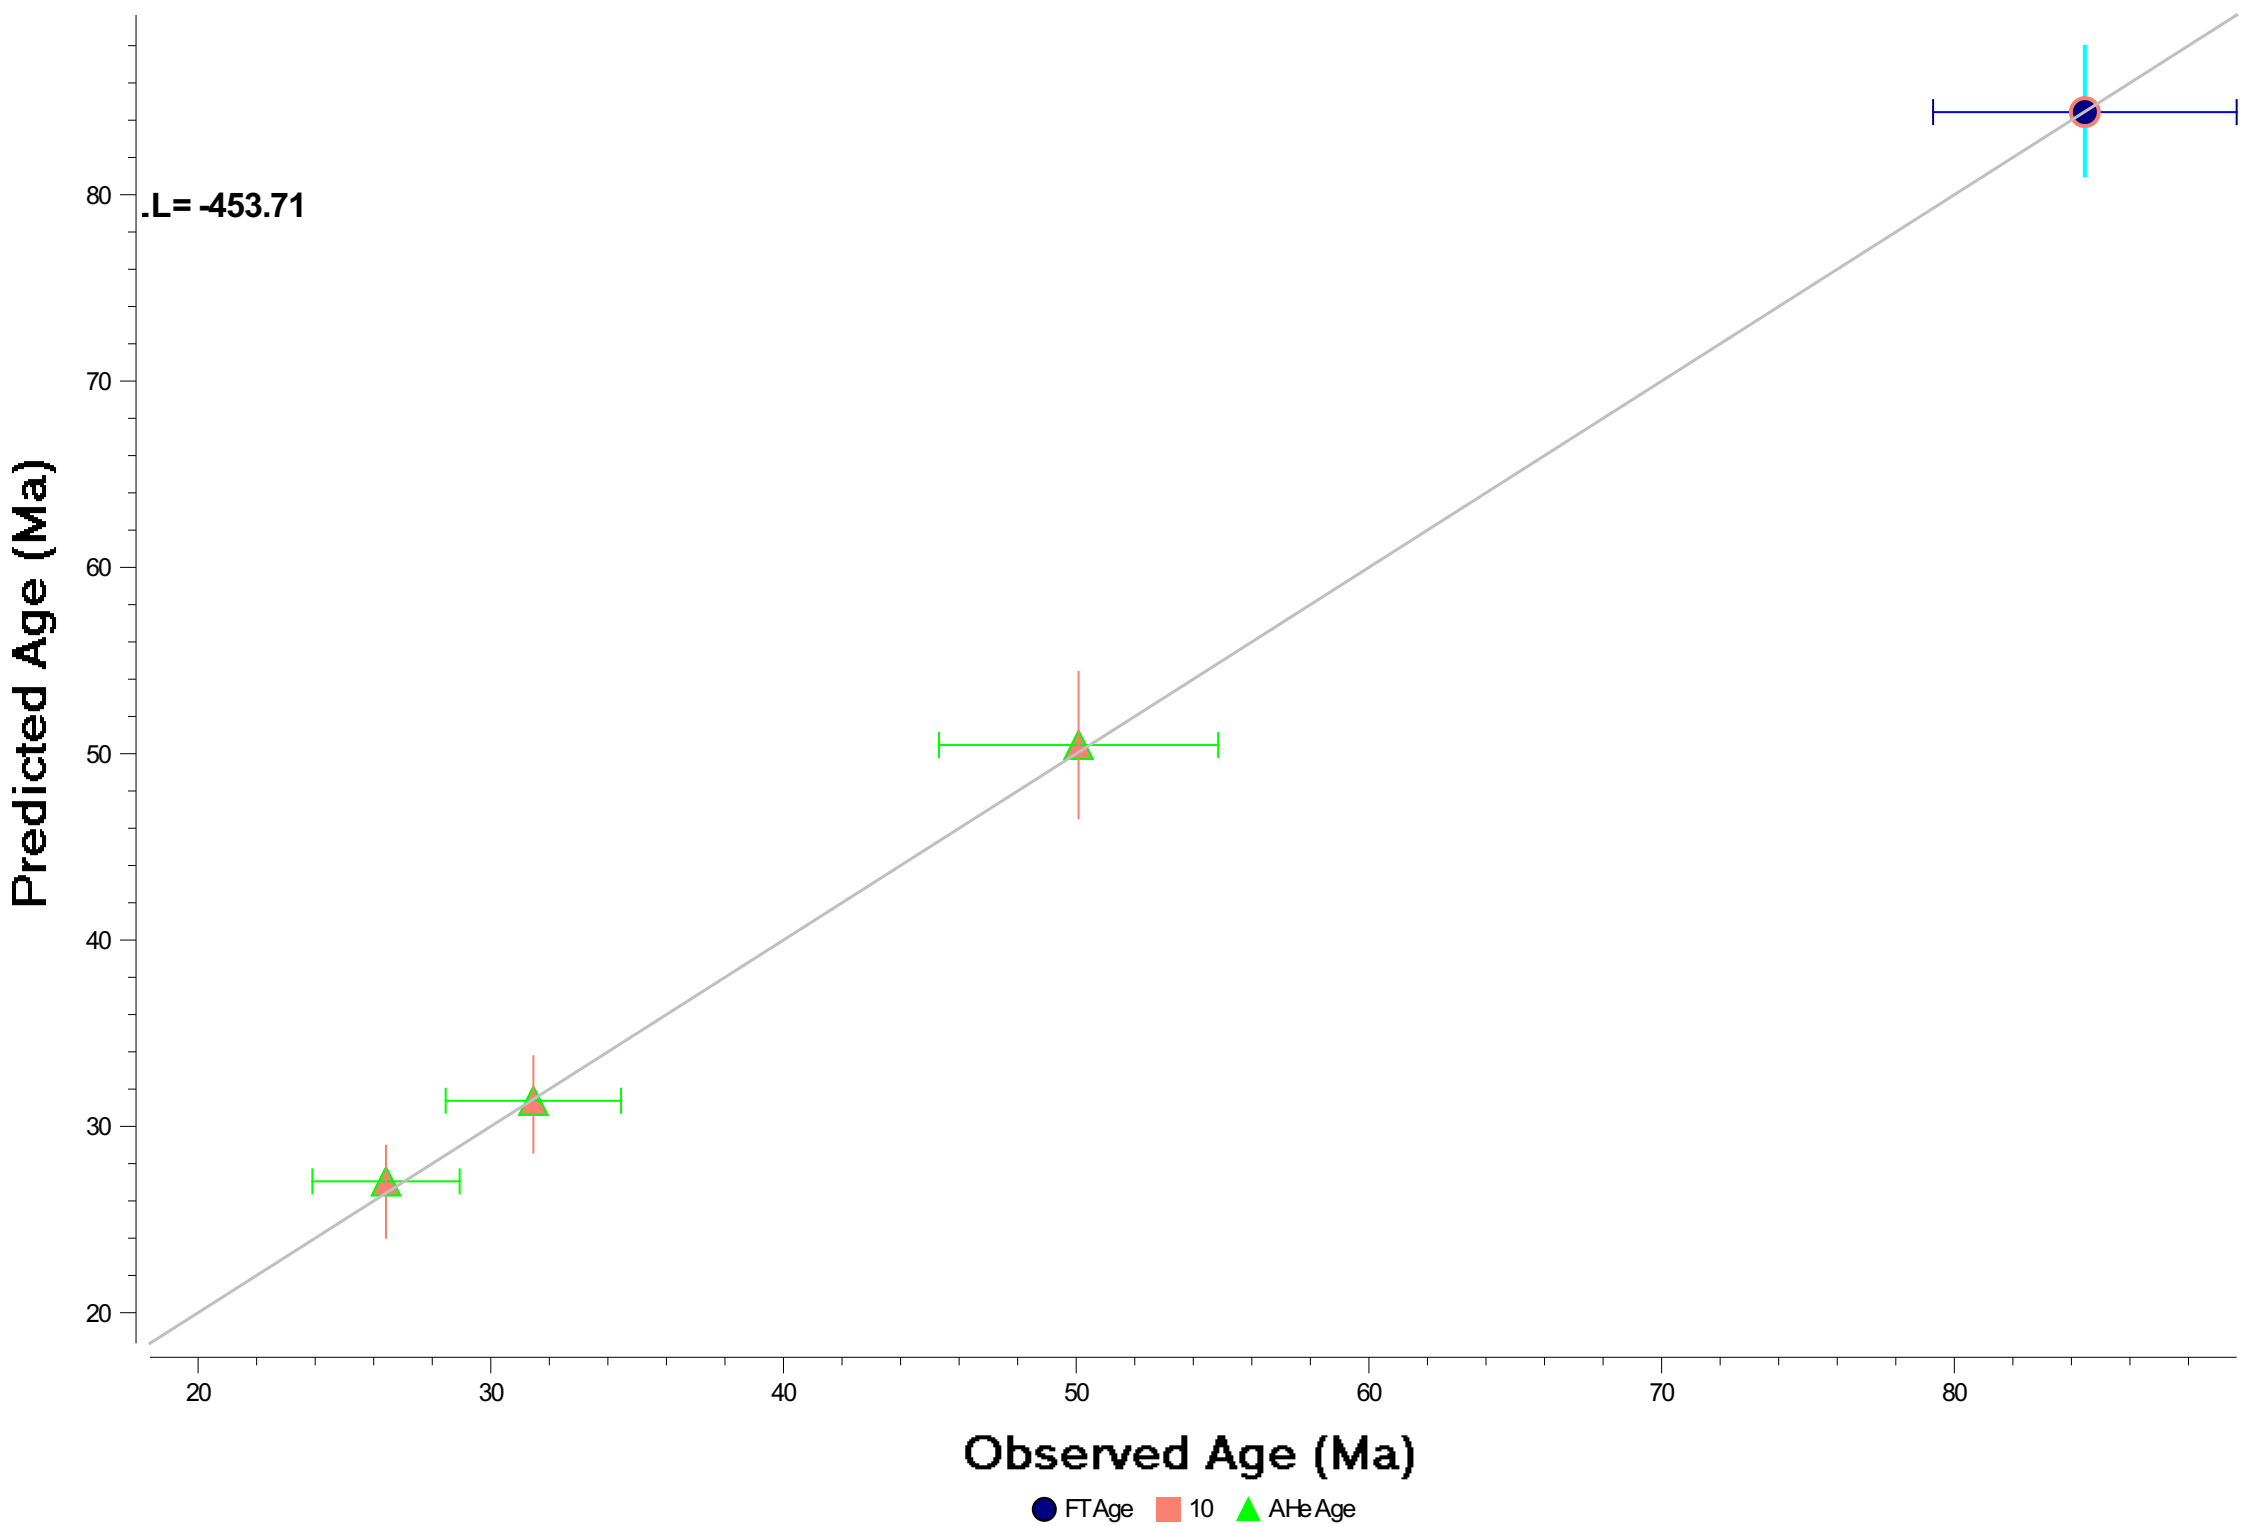

Supplement: Supplementary file 5 [file 1]

# Exercise4\_GROUPD-1\_3\_Exercise4\_InputData.txt 10.00m : Expected

No. of tracks (m)

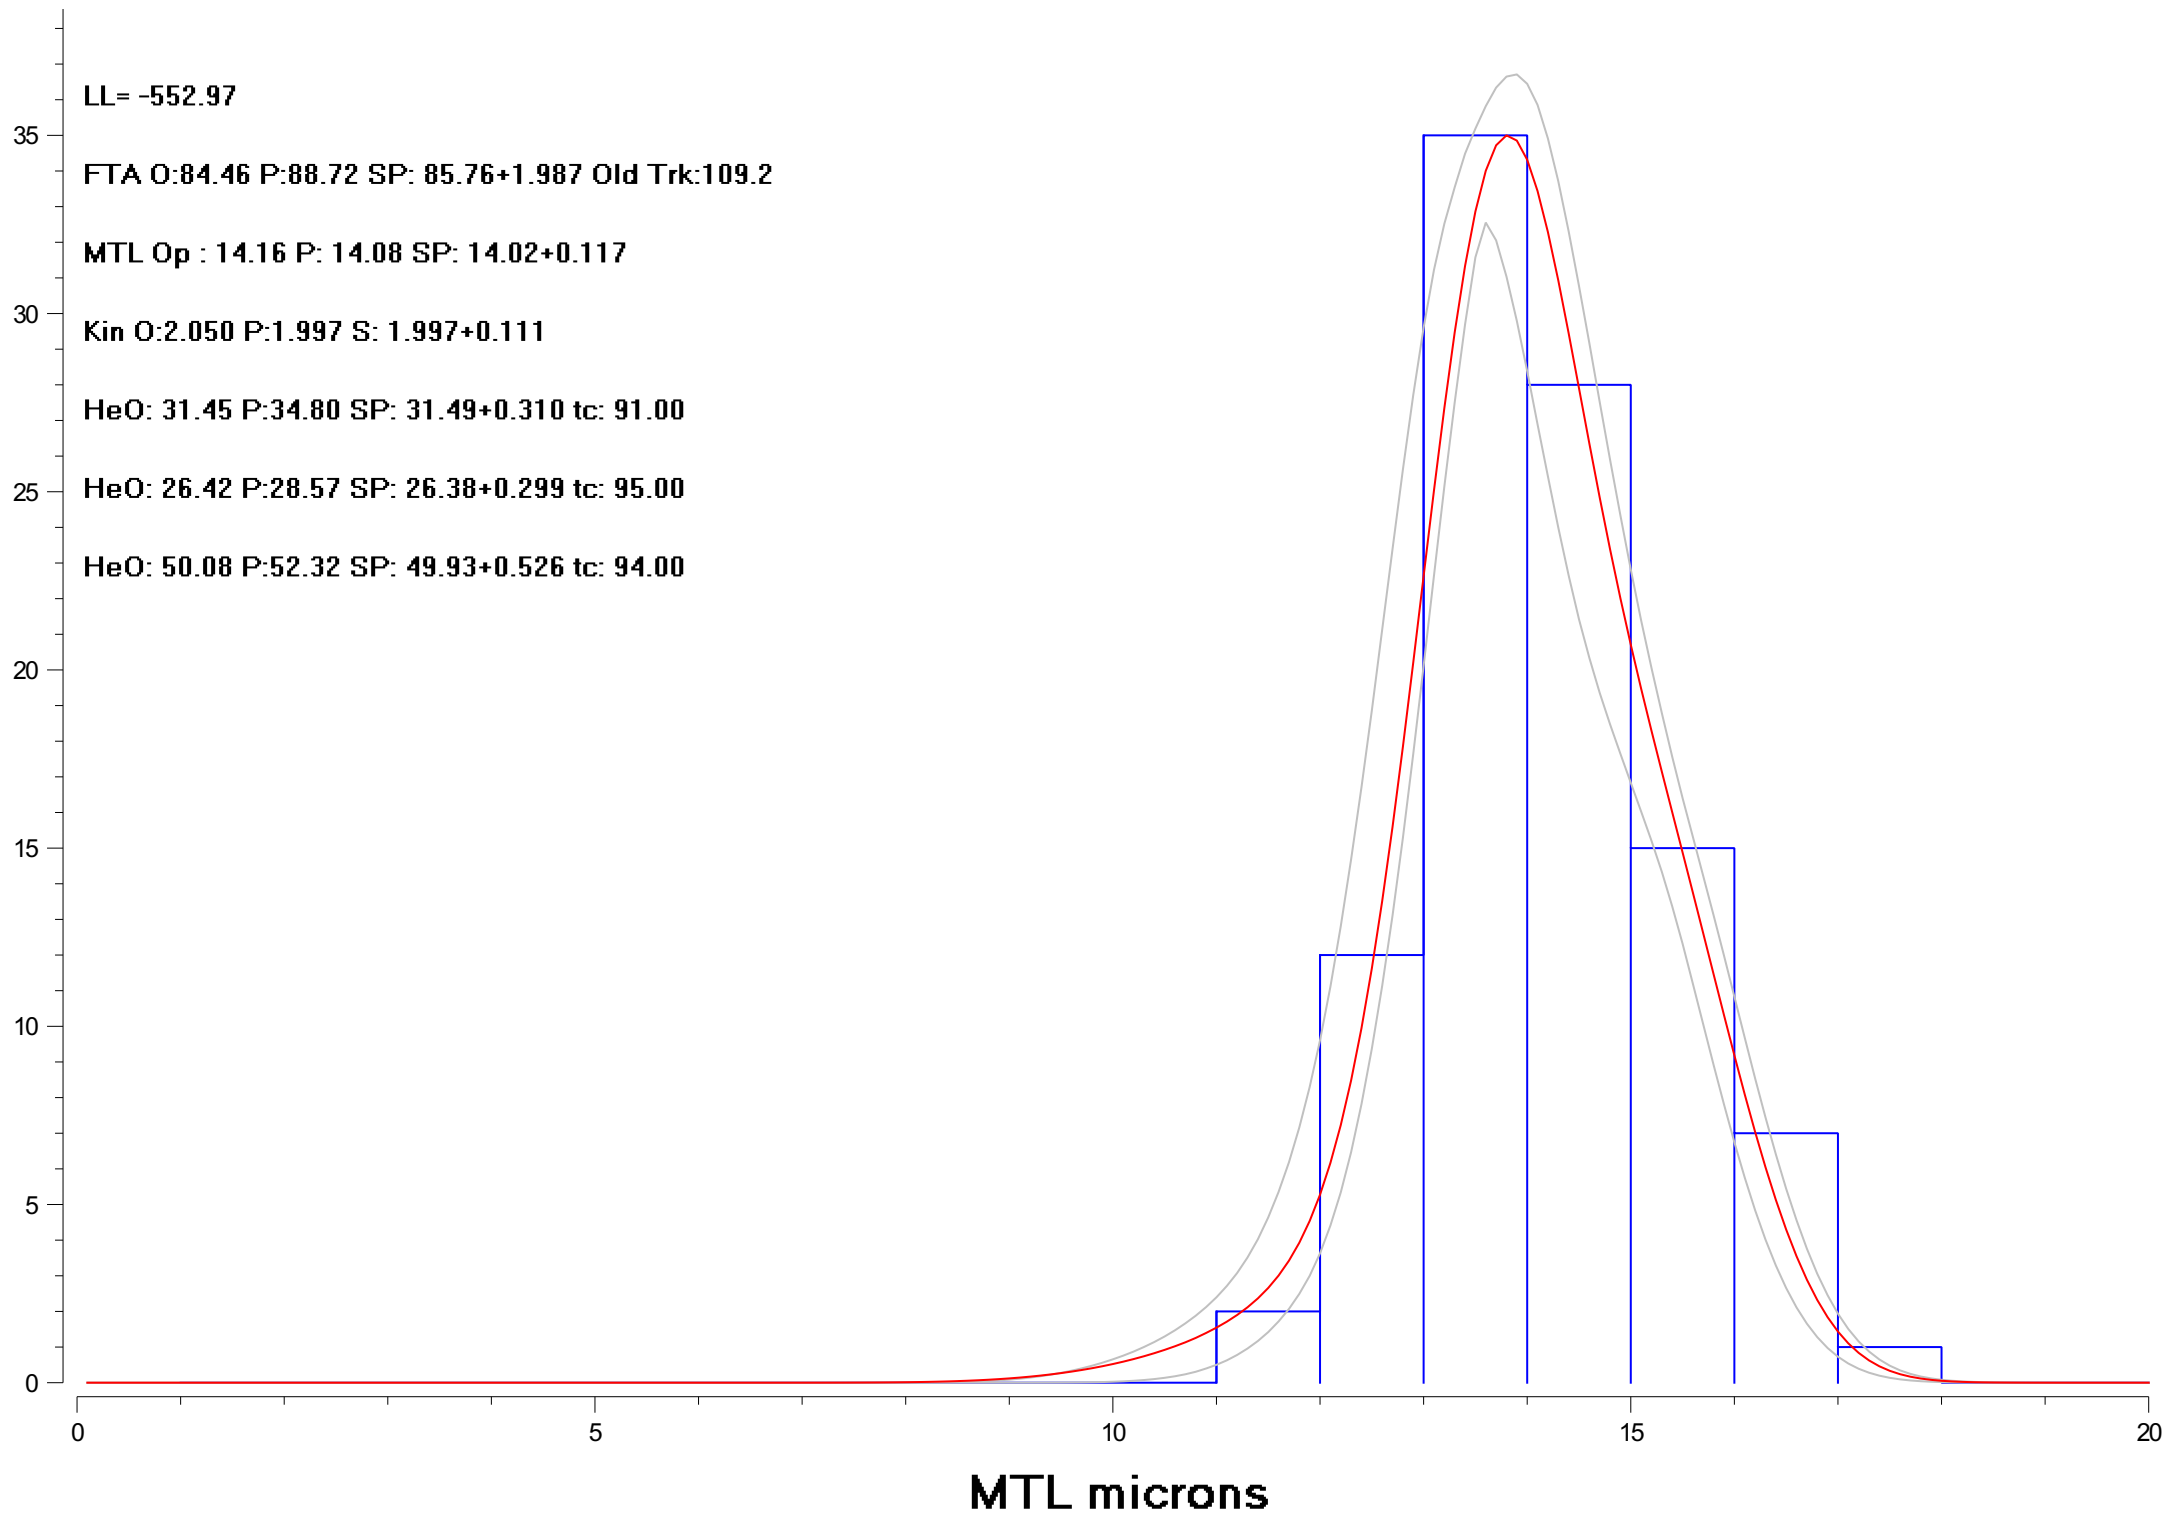

Supplement: Supplementary file 6 [file 1]

# Exercise4\_GROUPD-1\_3\_Exercise4\_InputData.txt : Max Posterior

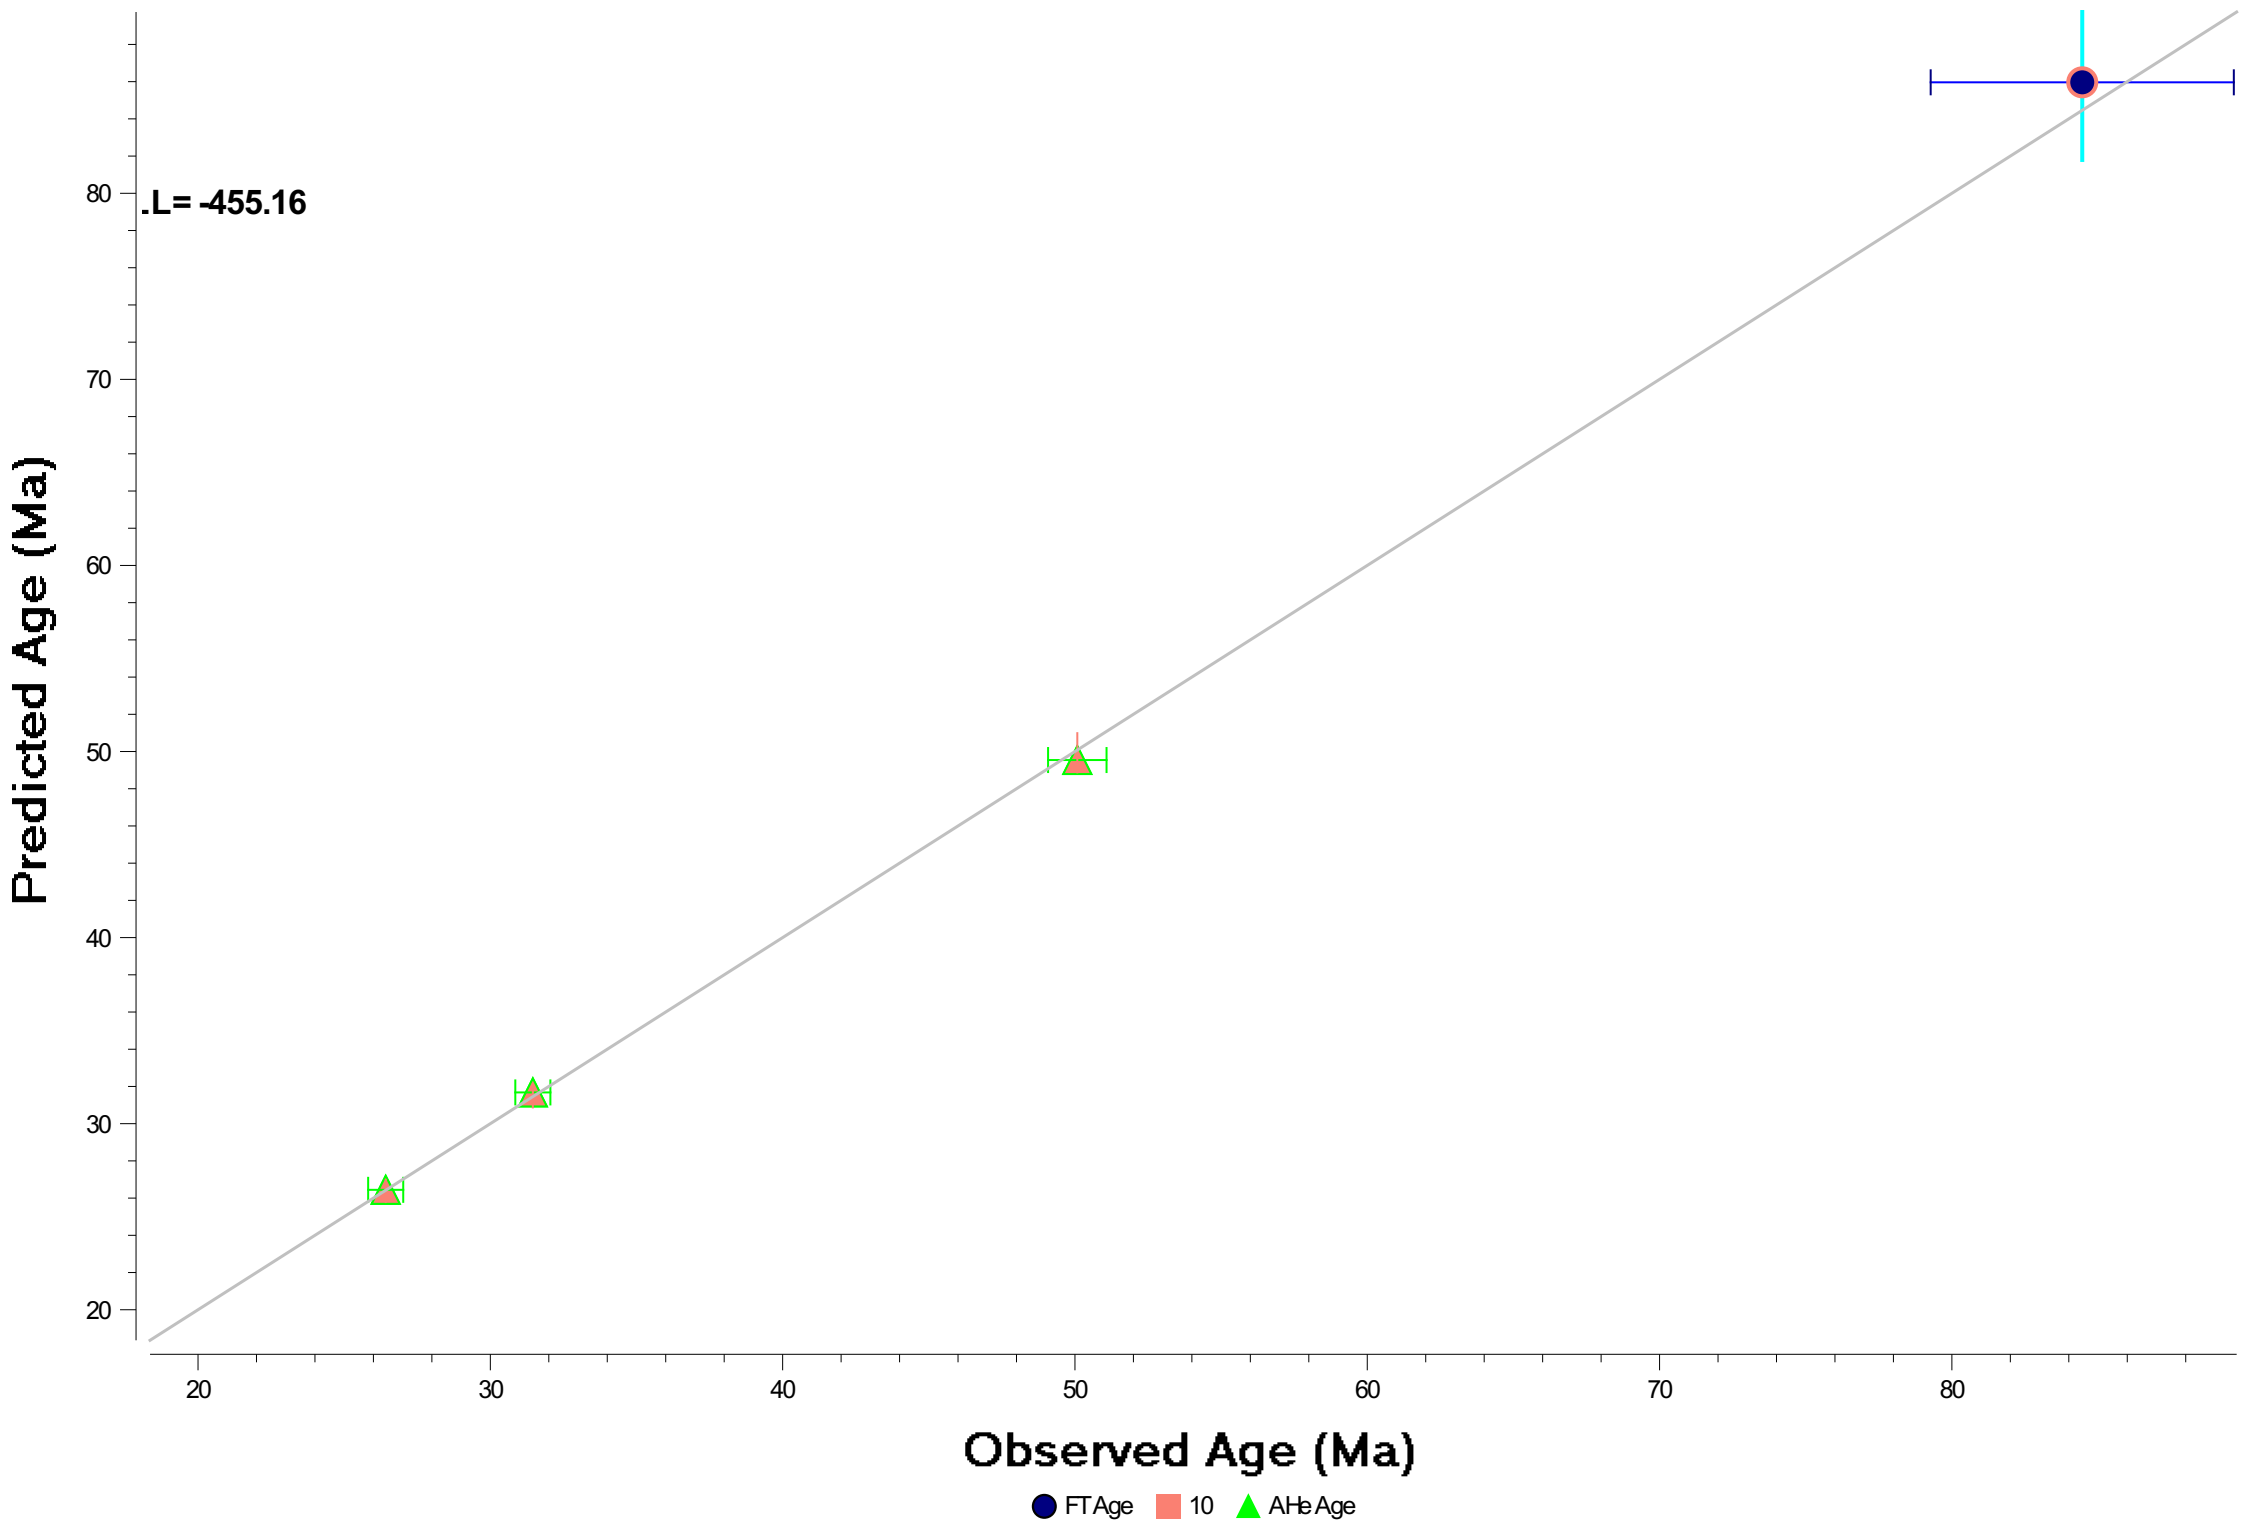

Supplement: Supplementary file 7 [file 1]

# Exercise4\_GROUPB-2\_3 : Max Post

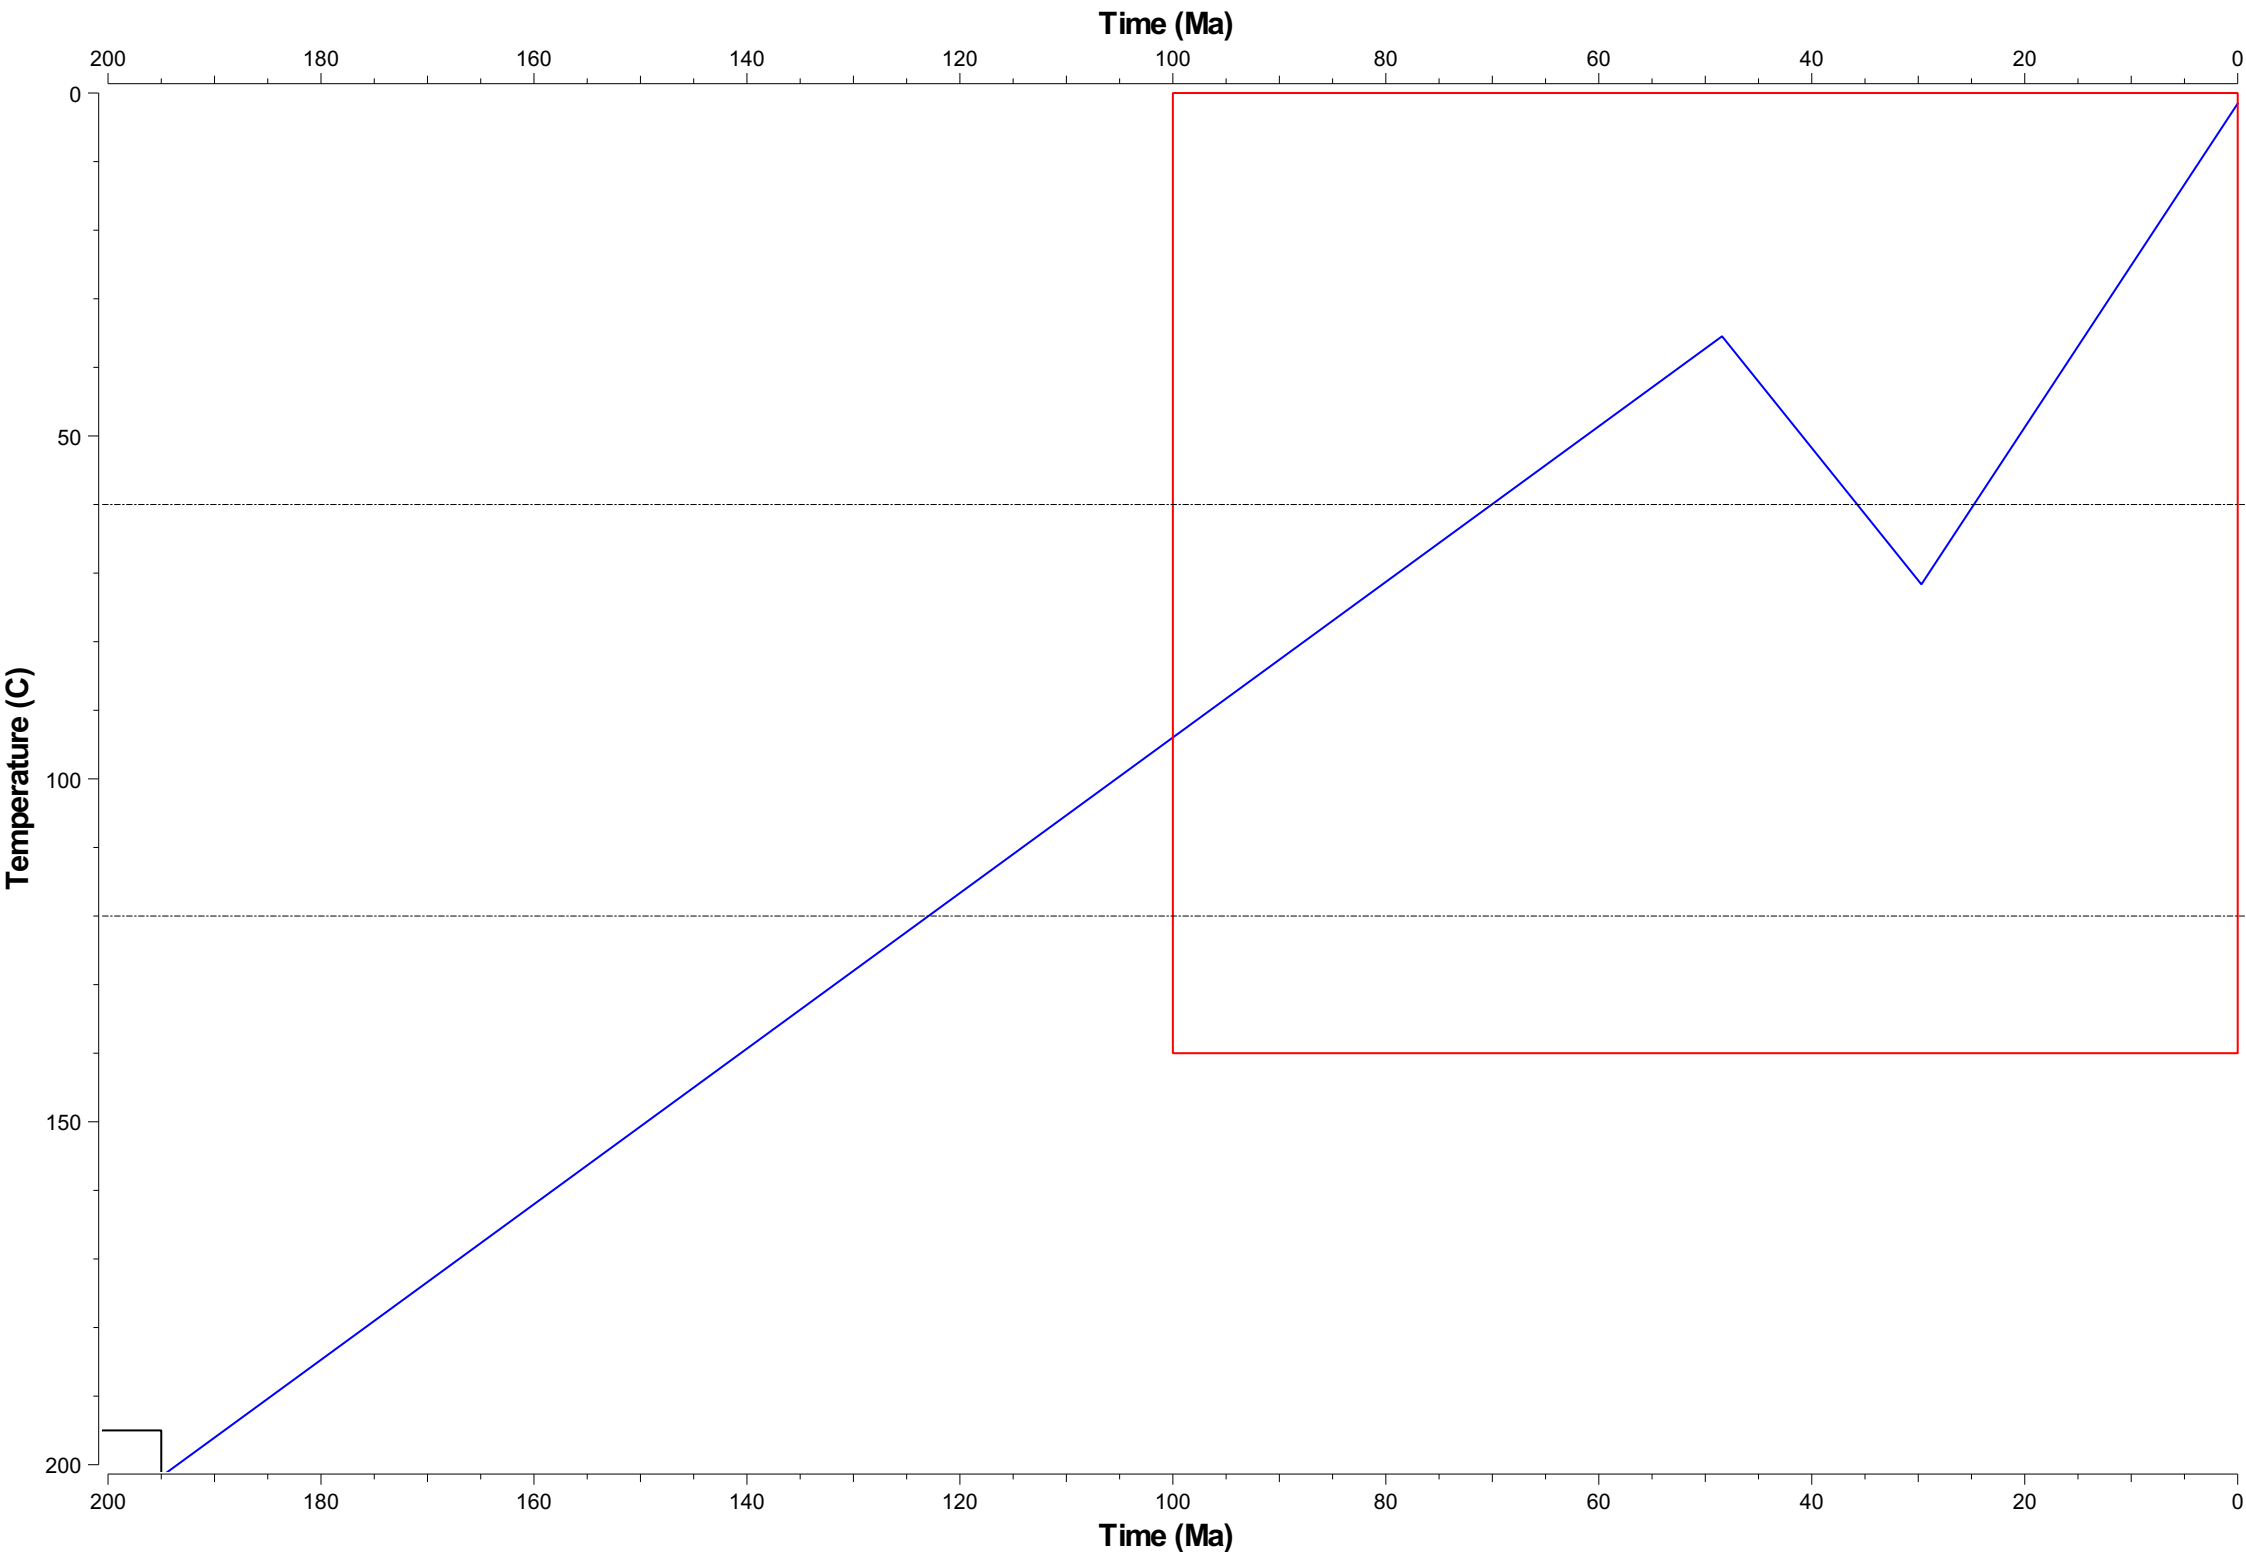

Supplement: Supplementary file 8 [file 1]

# Exercise4\_GROUPA-2\_3\_Exercise4\_InputData.txt 10.00m : Max Post

No. of tracks (m)

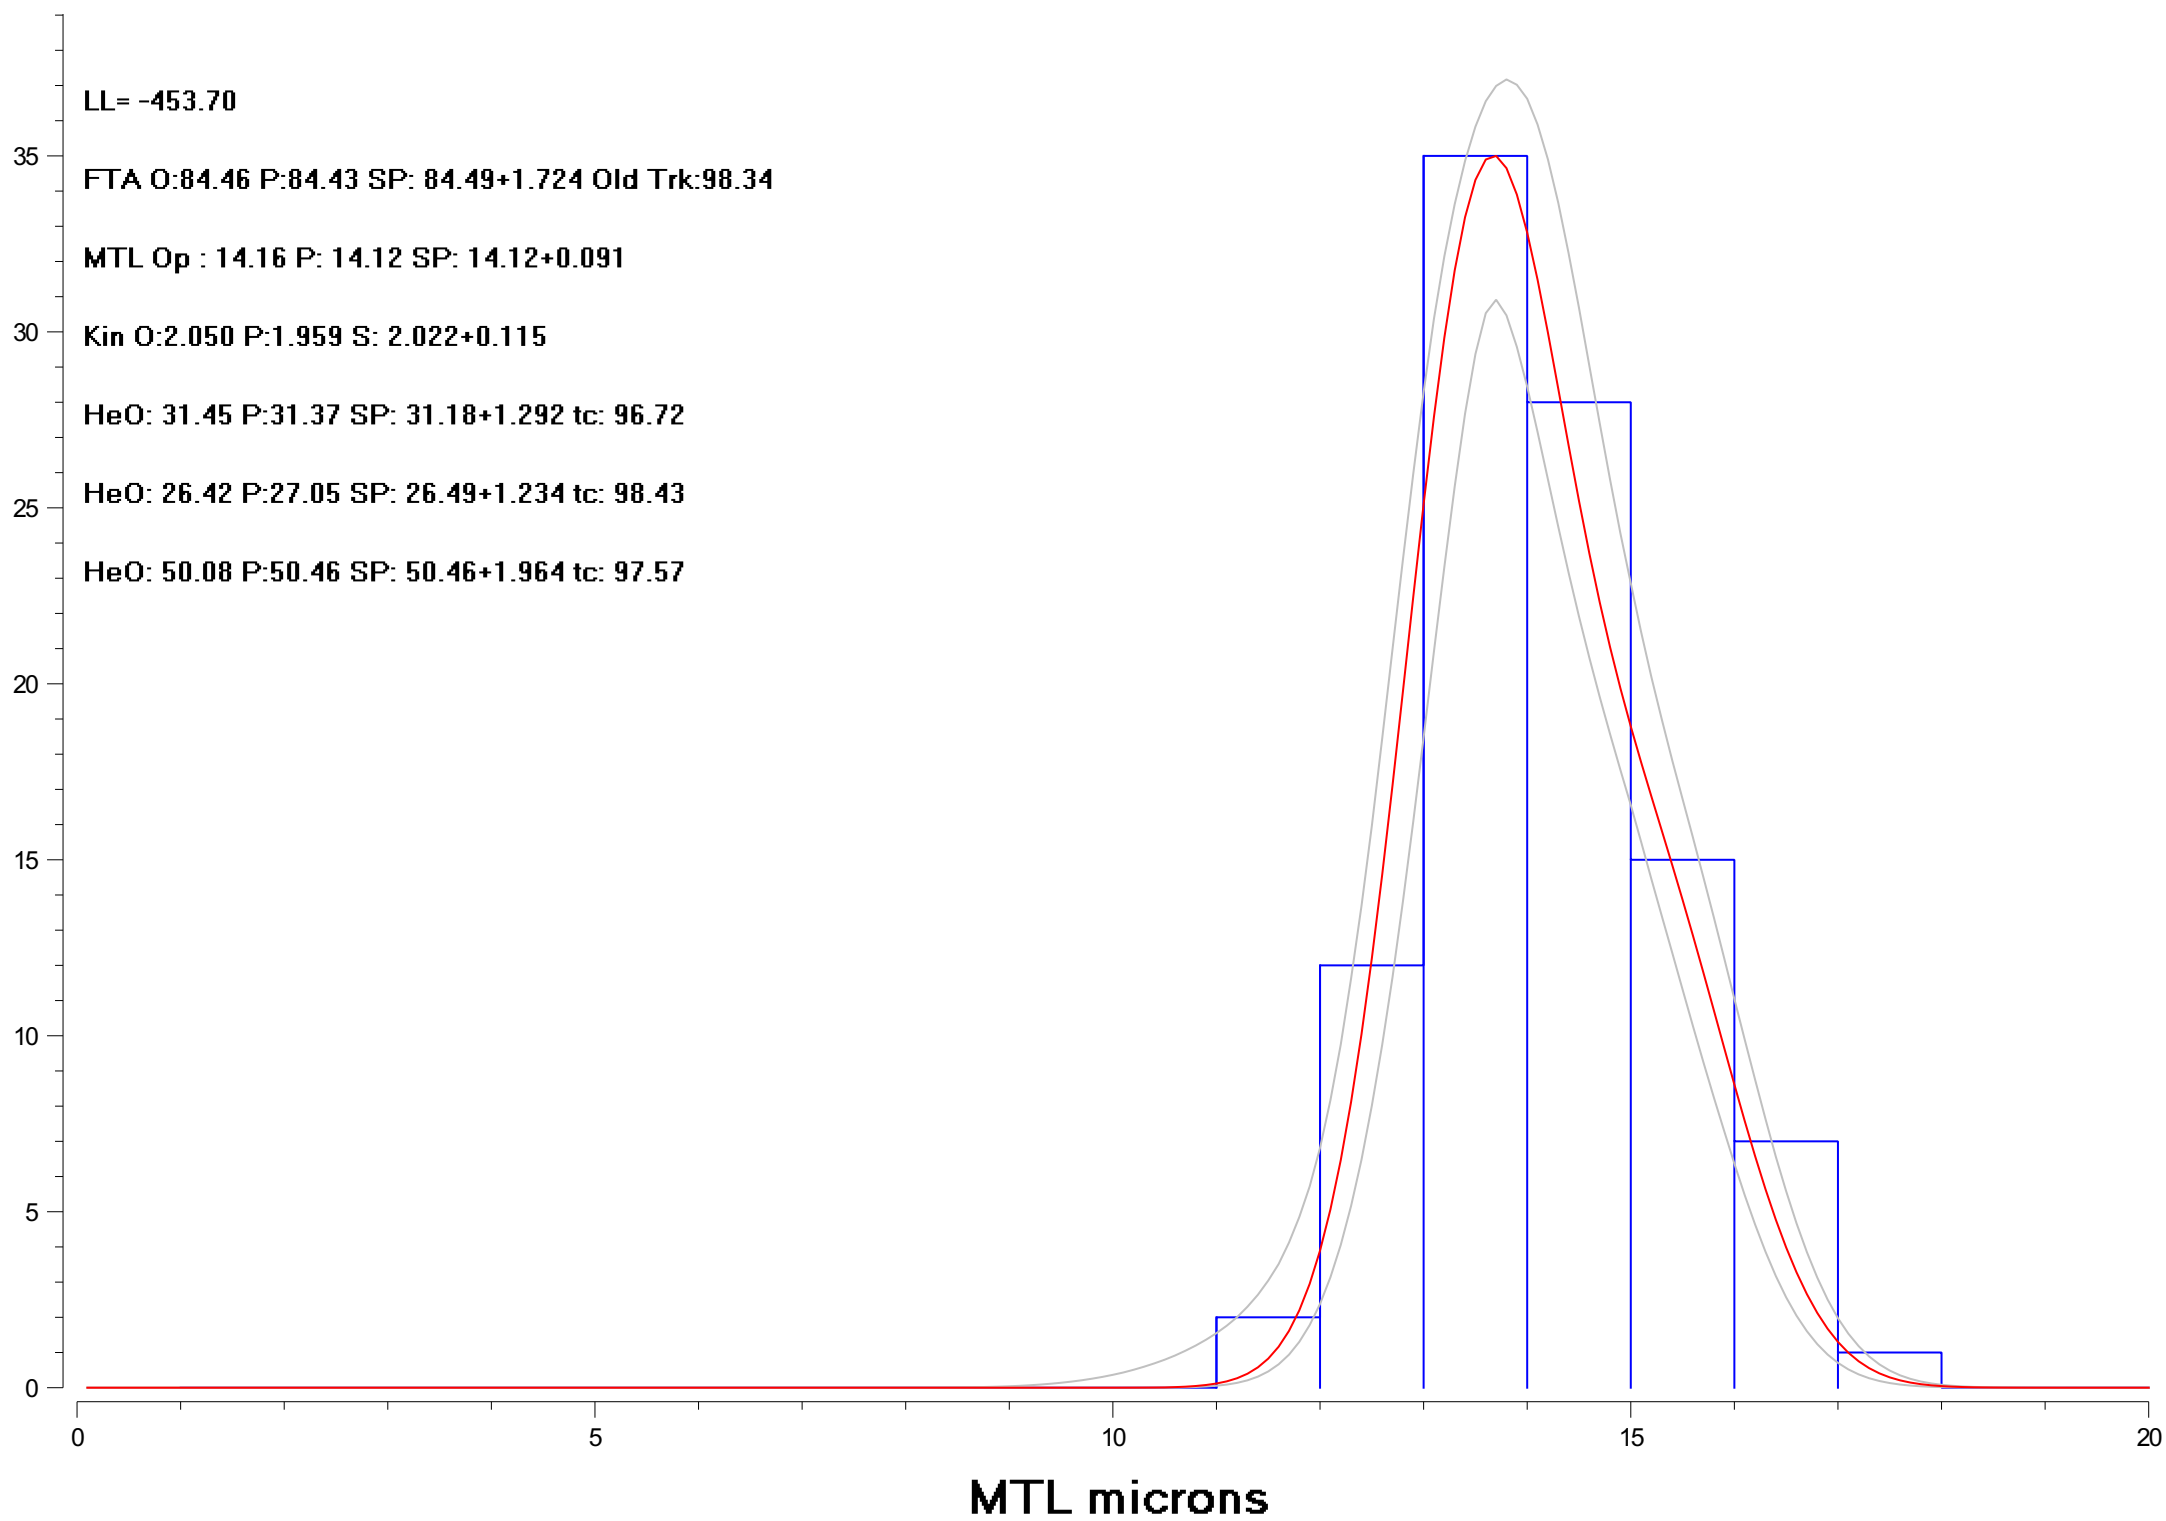

Supplement: Supplementary file 9 [file 1]

# Exercise4\_GROUPD-1\_3 : Max Post

Time (Ma)

Temperature (C)

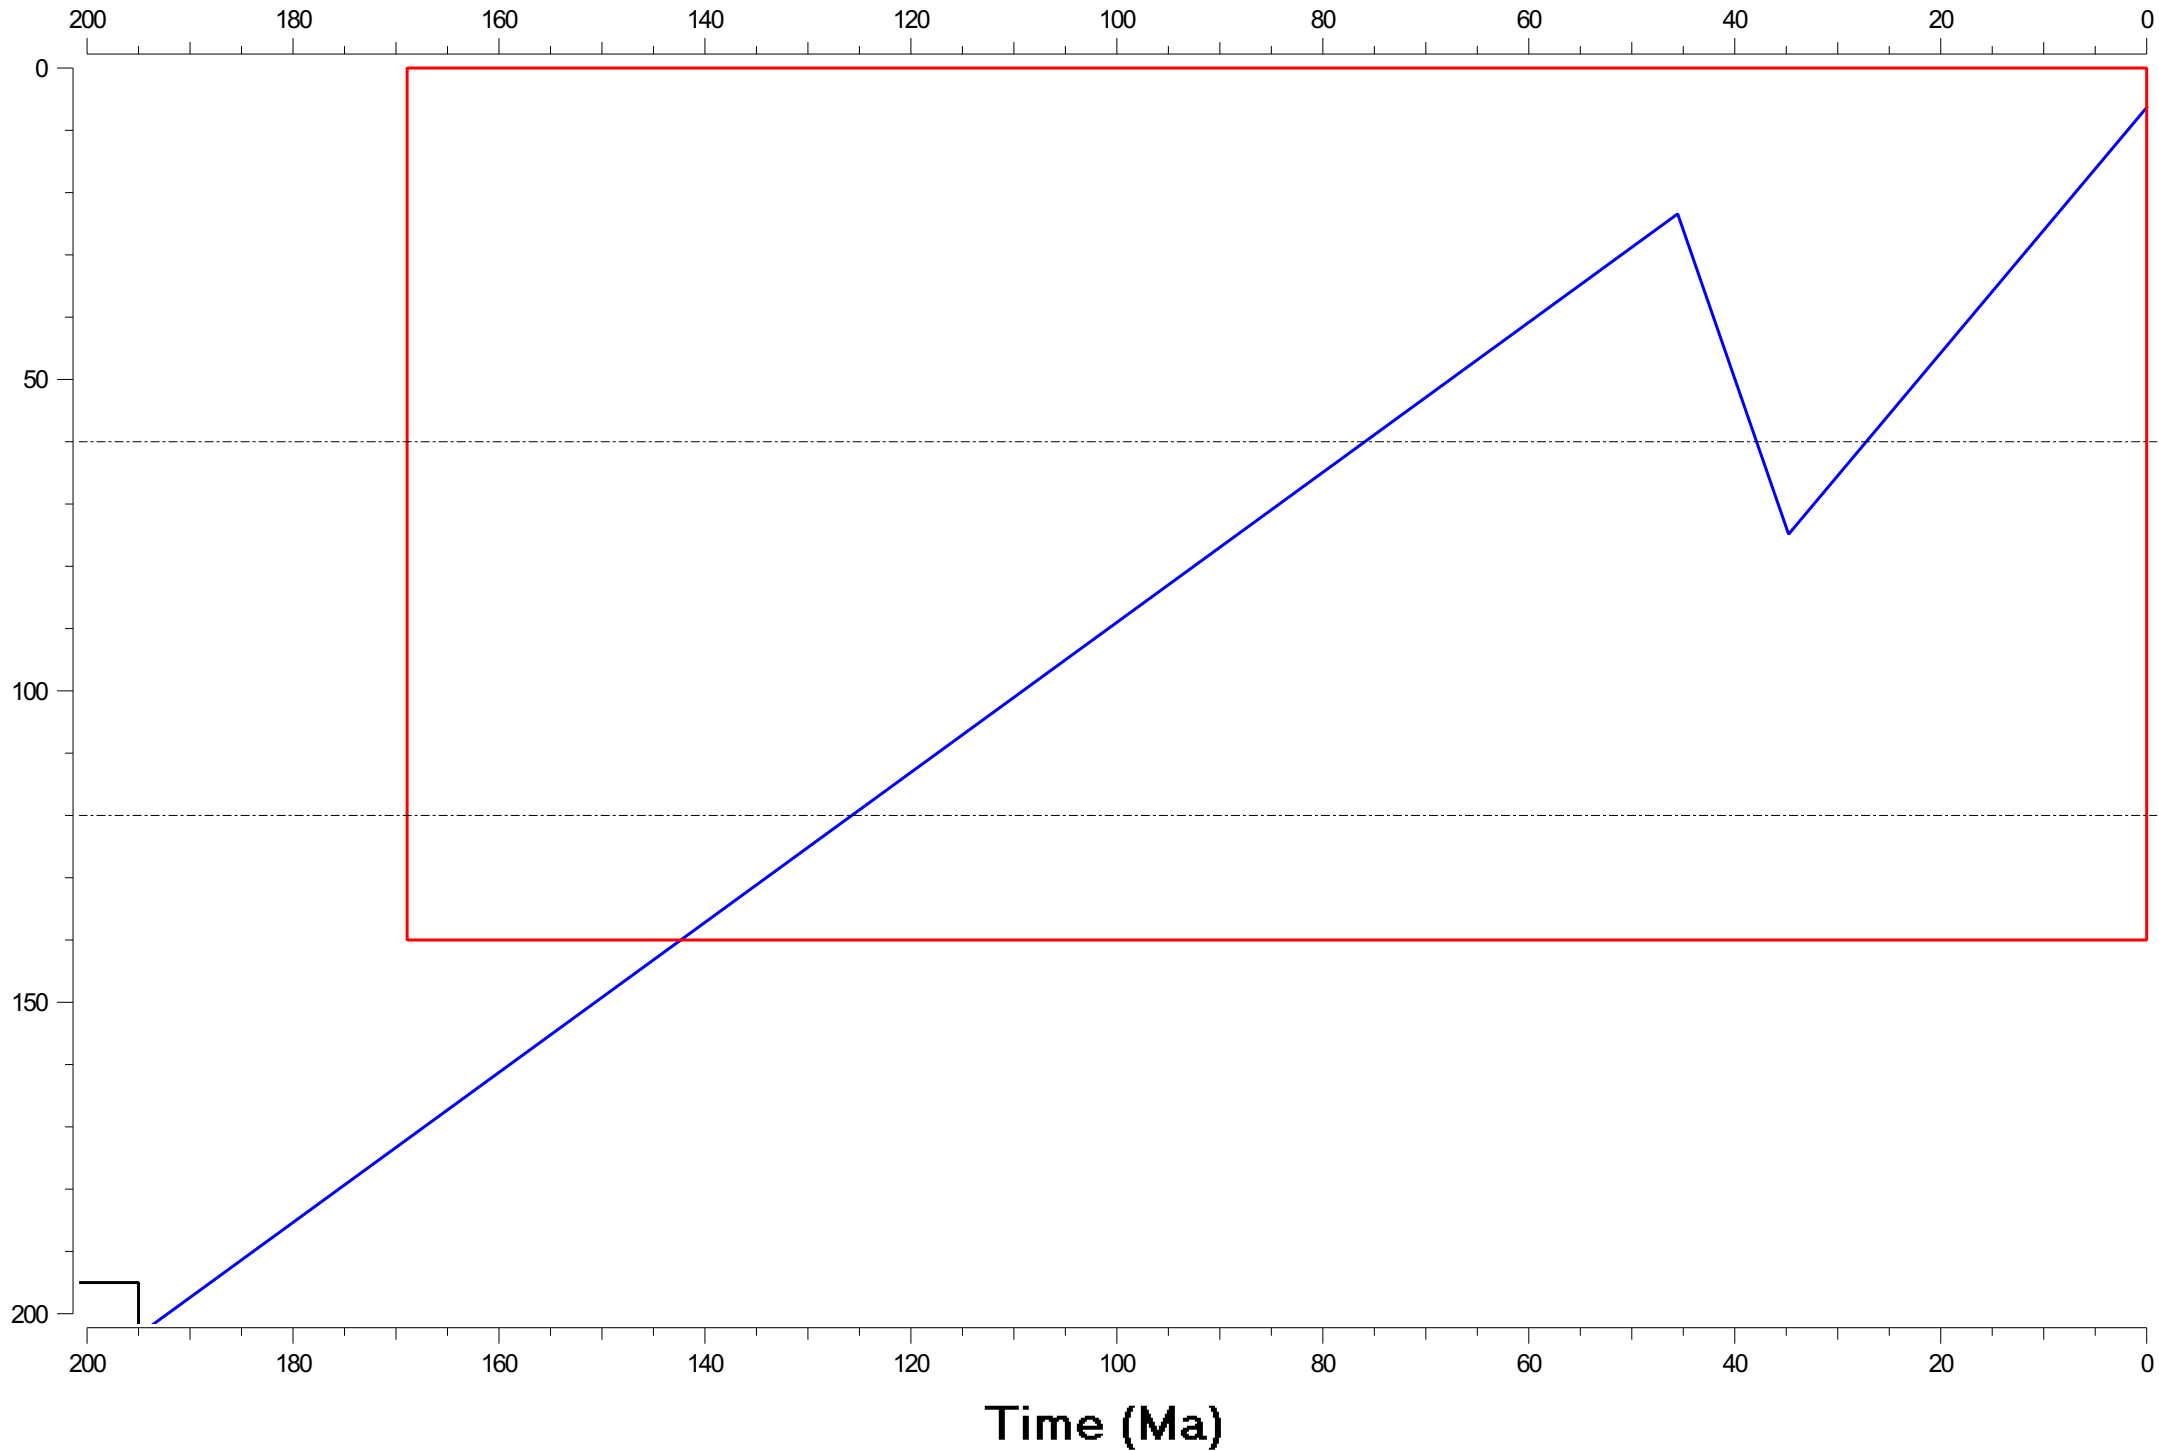

Supplement: Supplementary file 10 [file 1]

# Exercise4\_GROUPA-1\_3\_Exercise4\_InputData.txt 10.00m : Expected

No. of tracks (m)

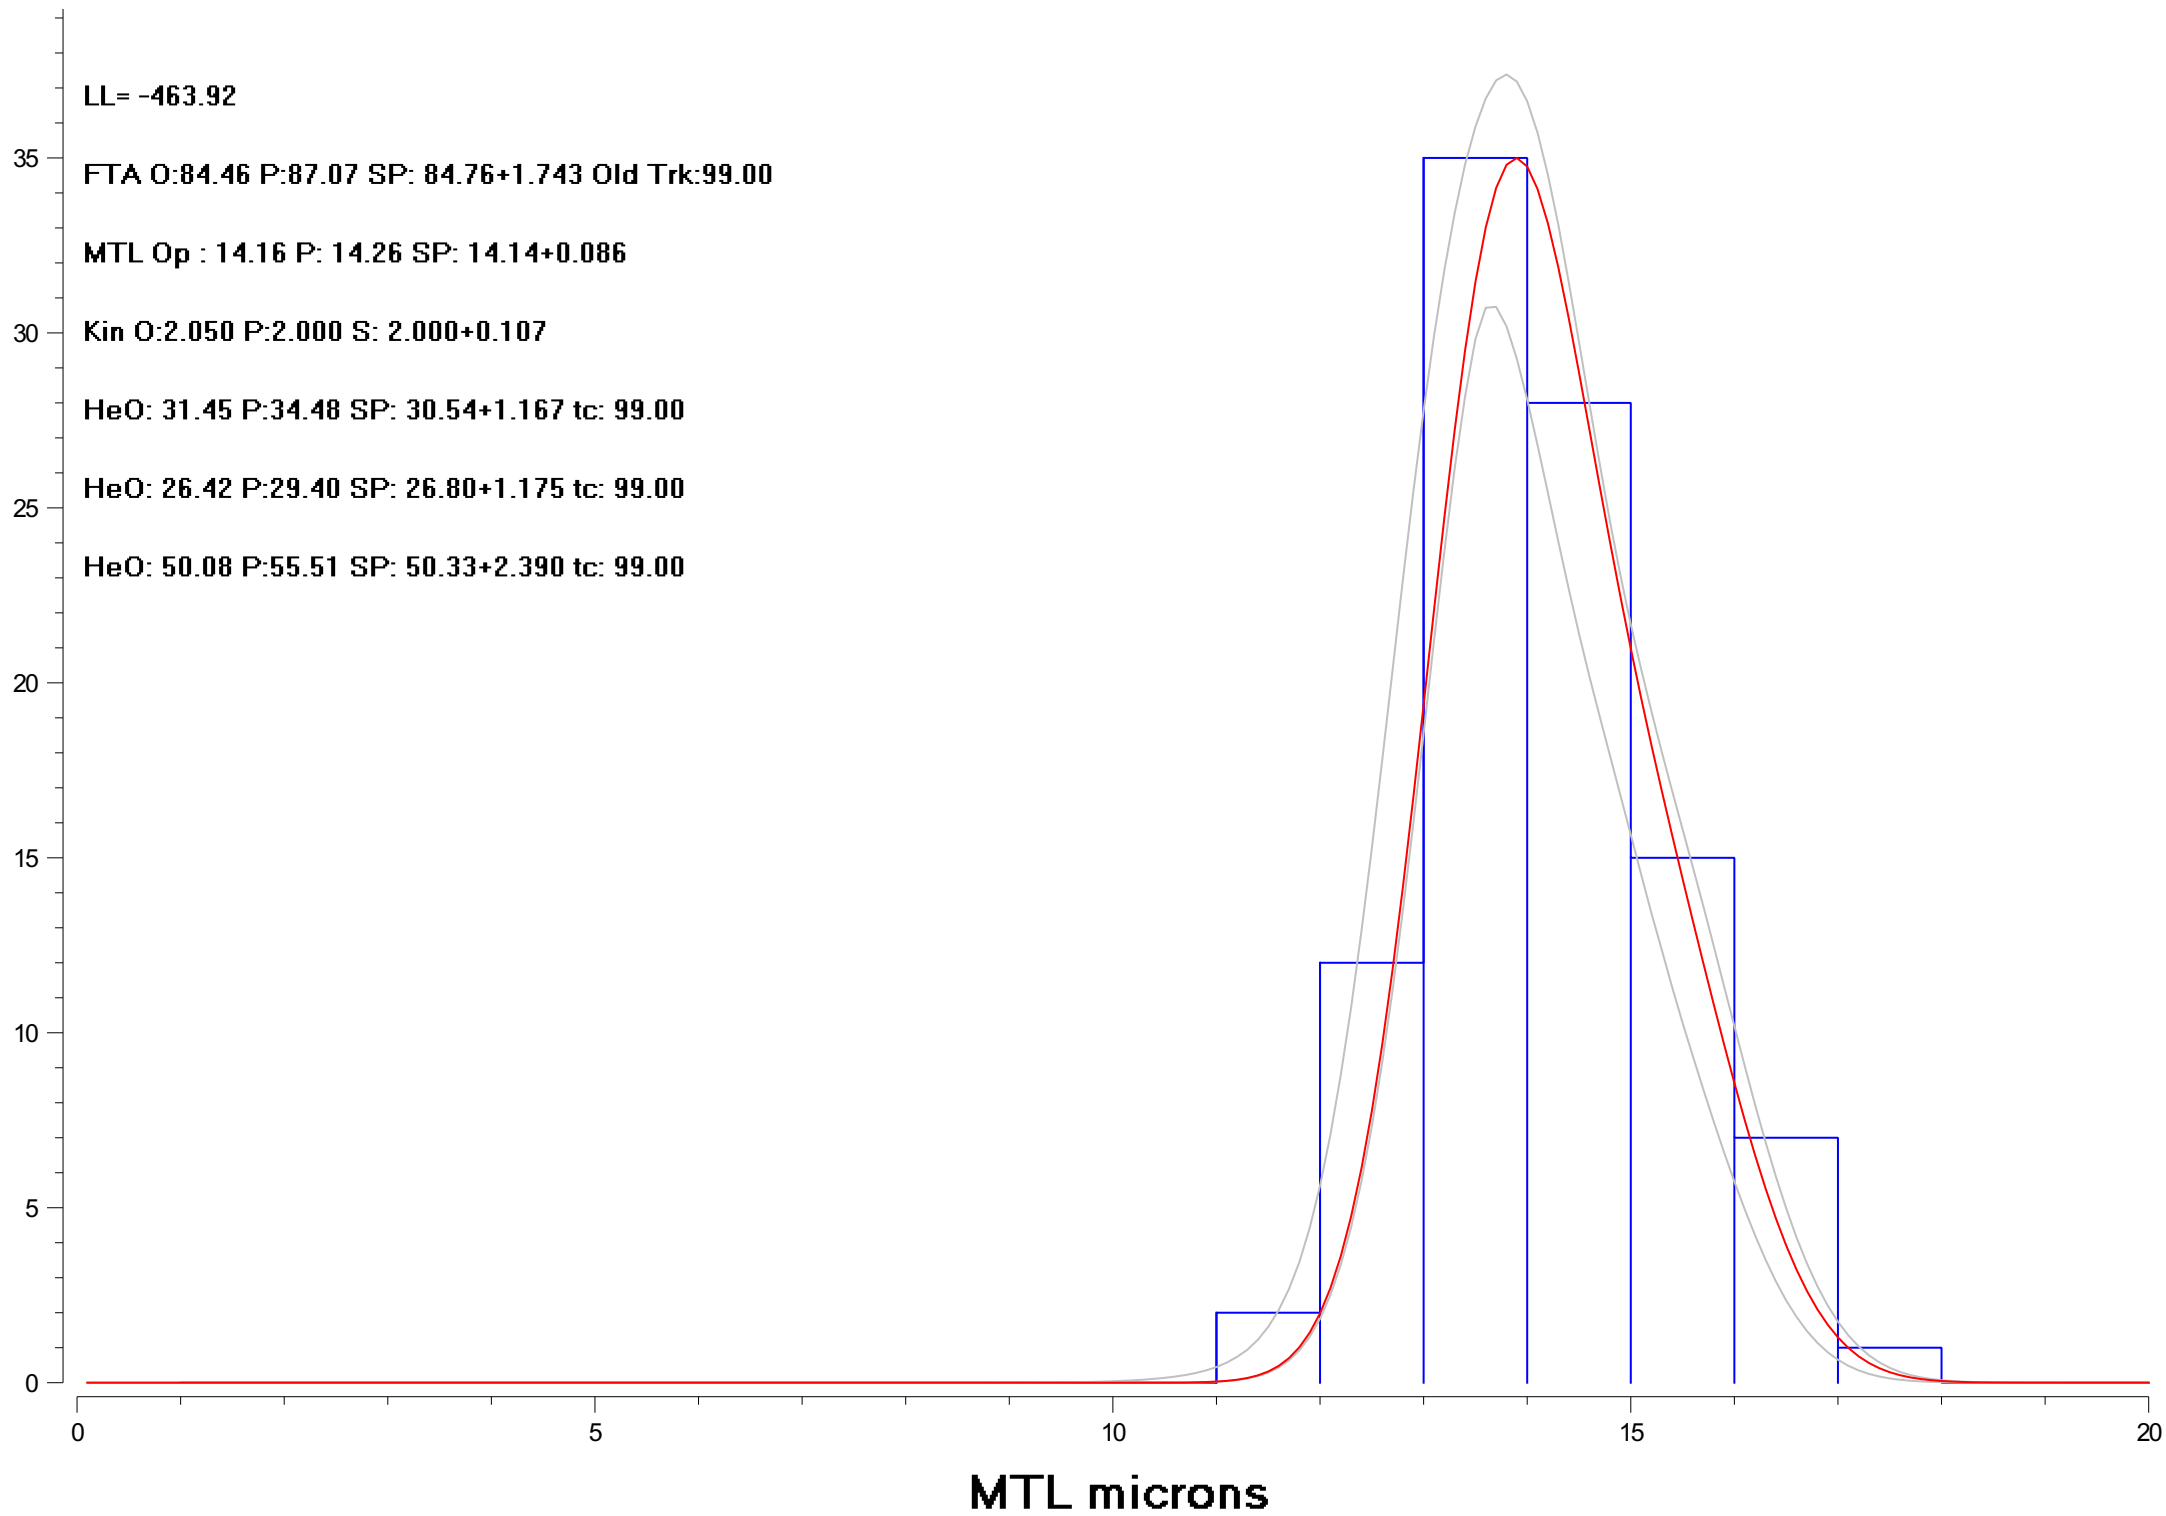

Supplement: Supplementary file 11 [file 1]

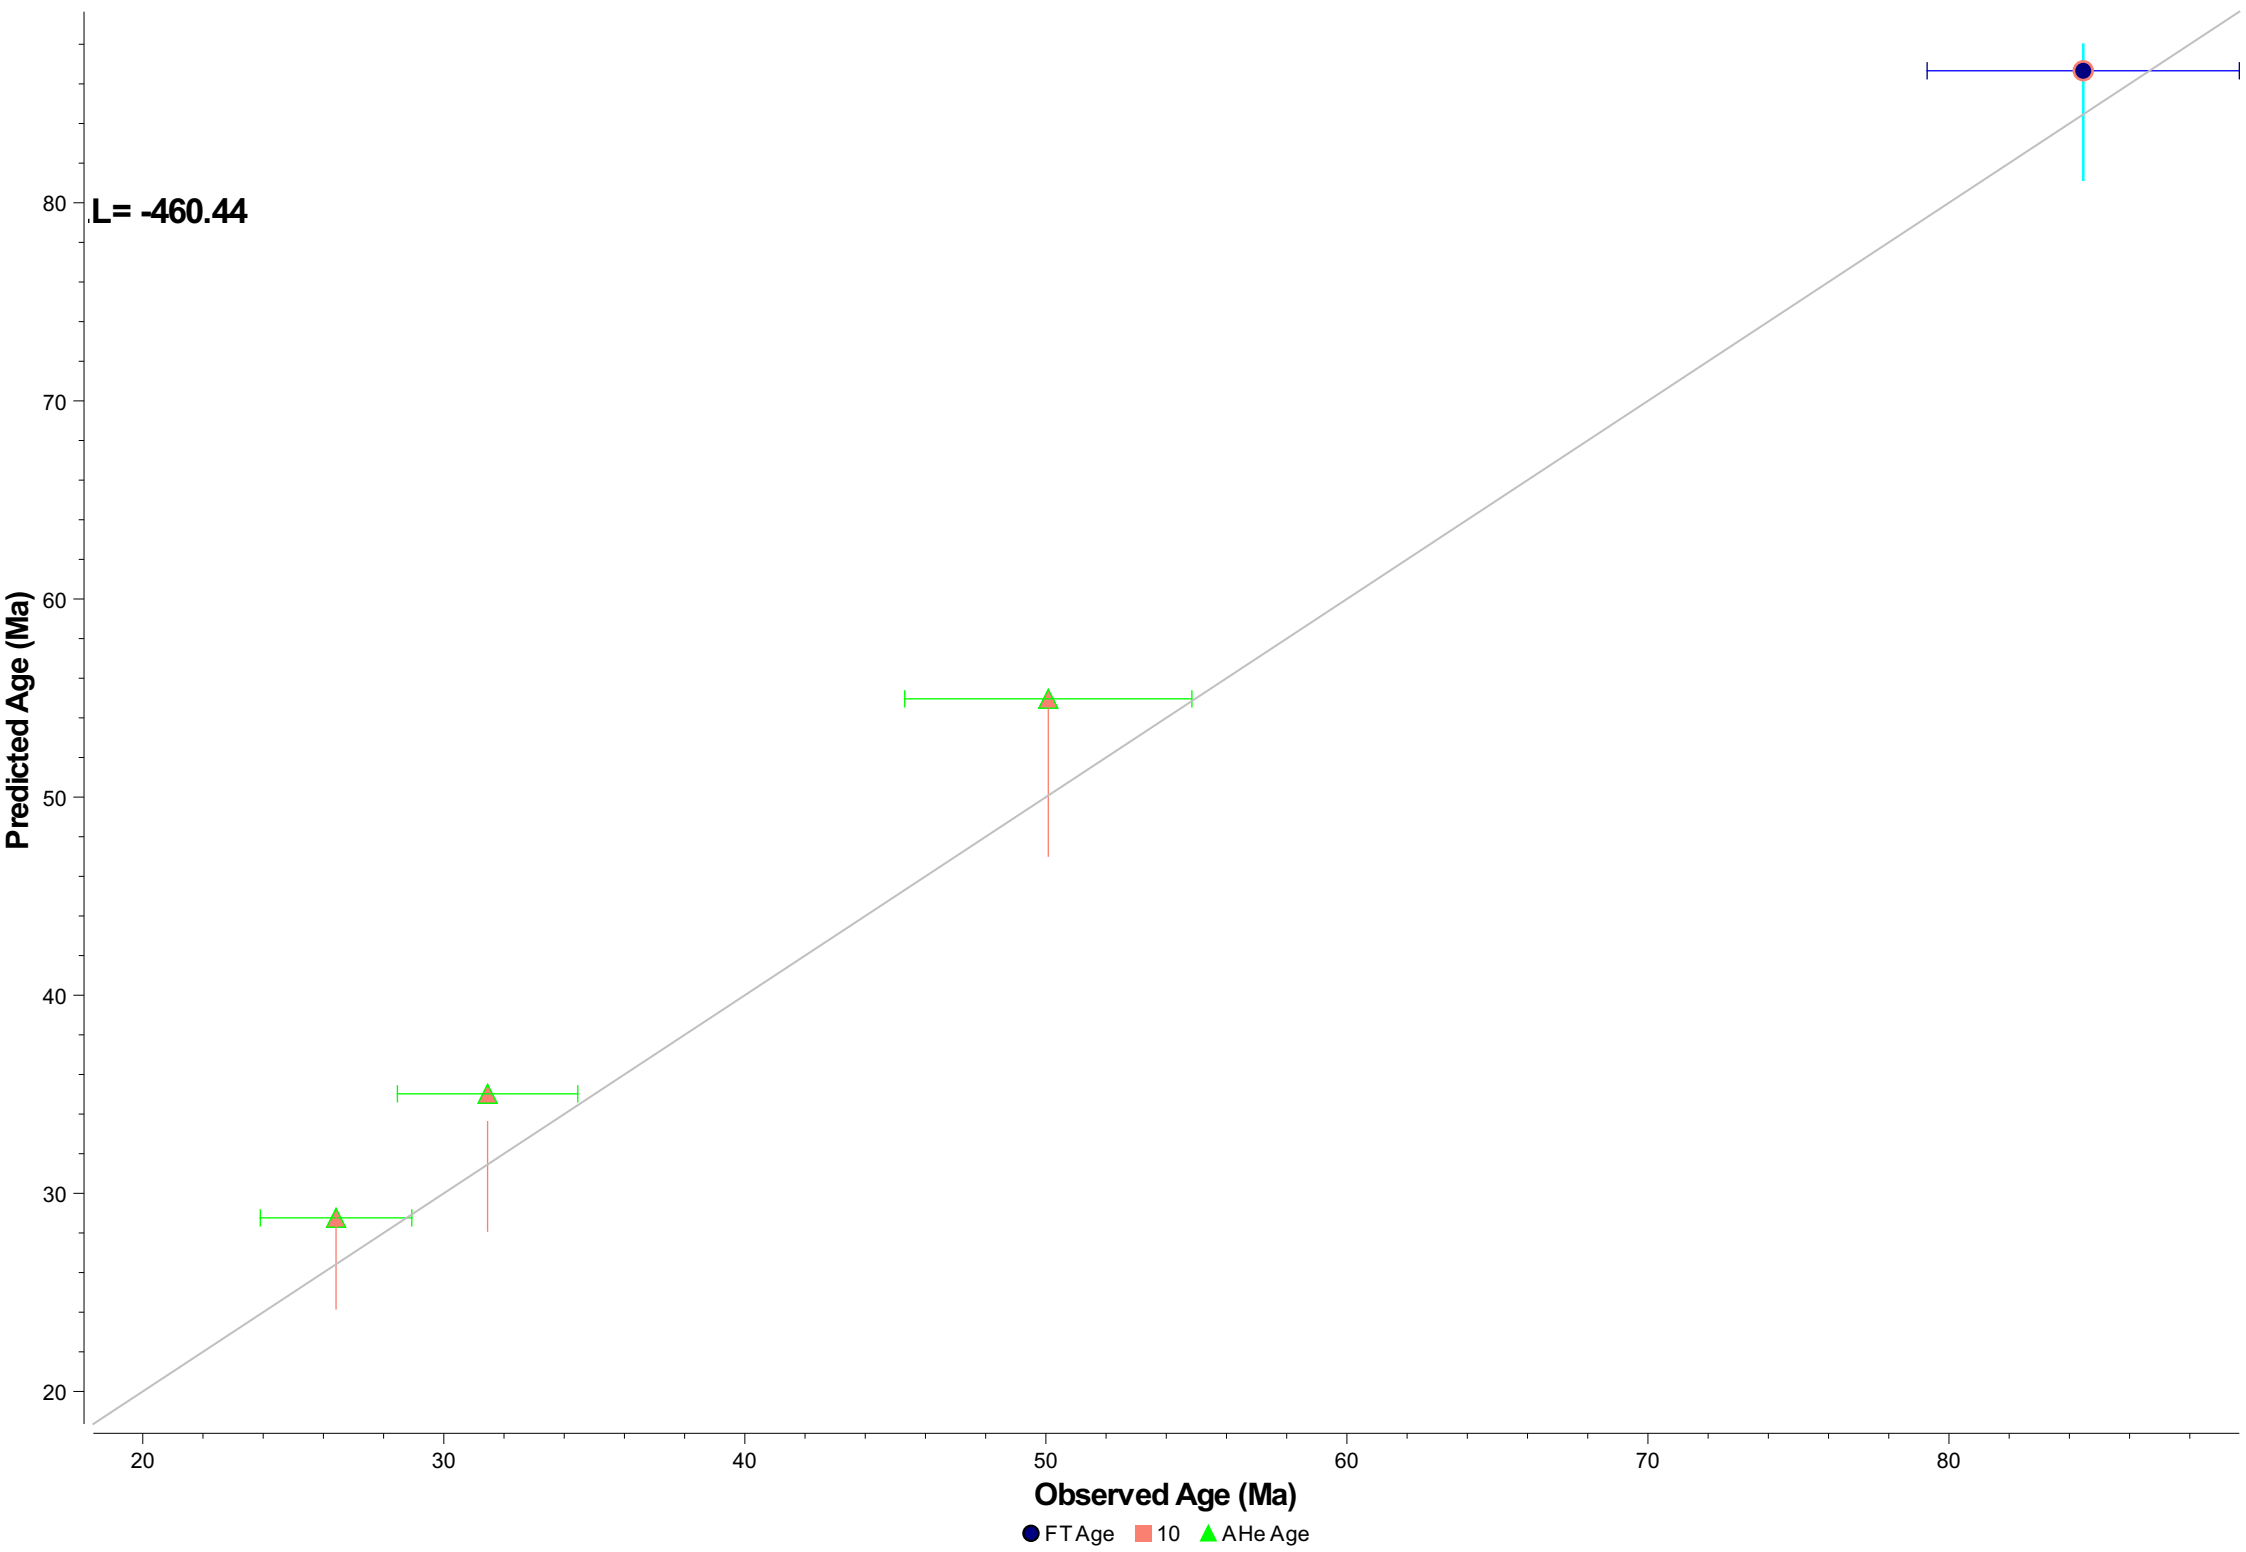

Supplement: Supplementary file 12 [file 1]

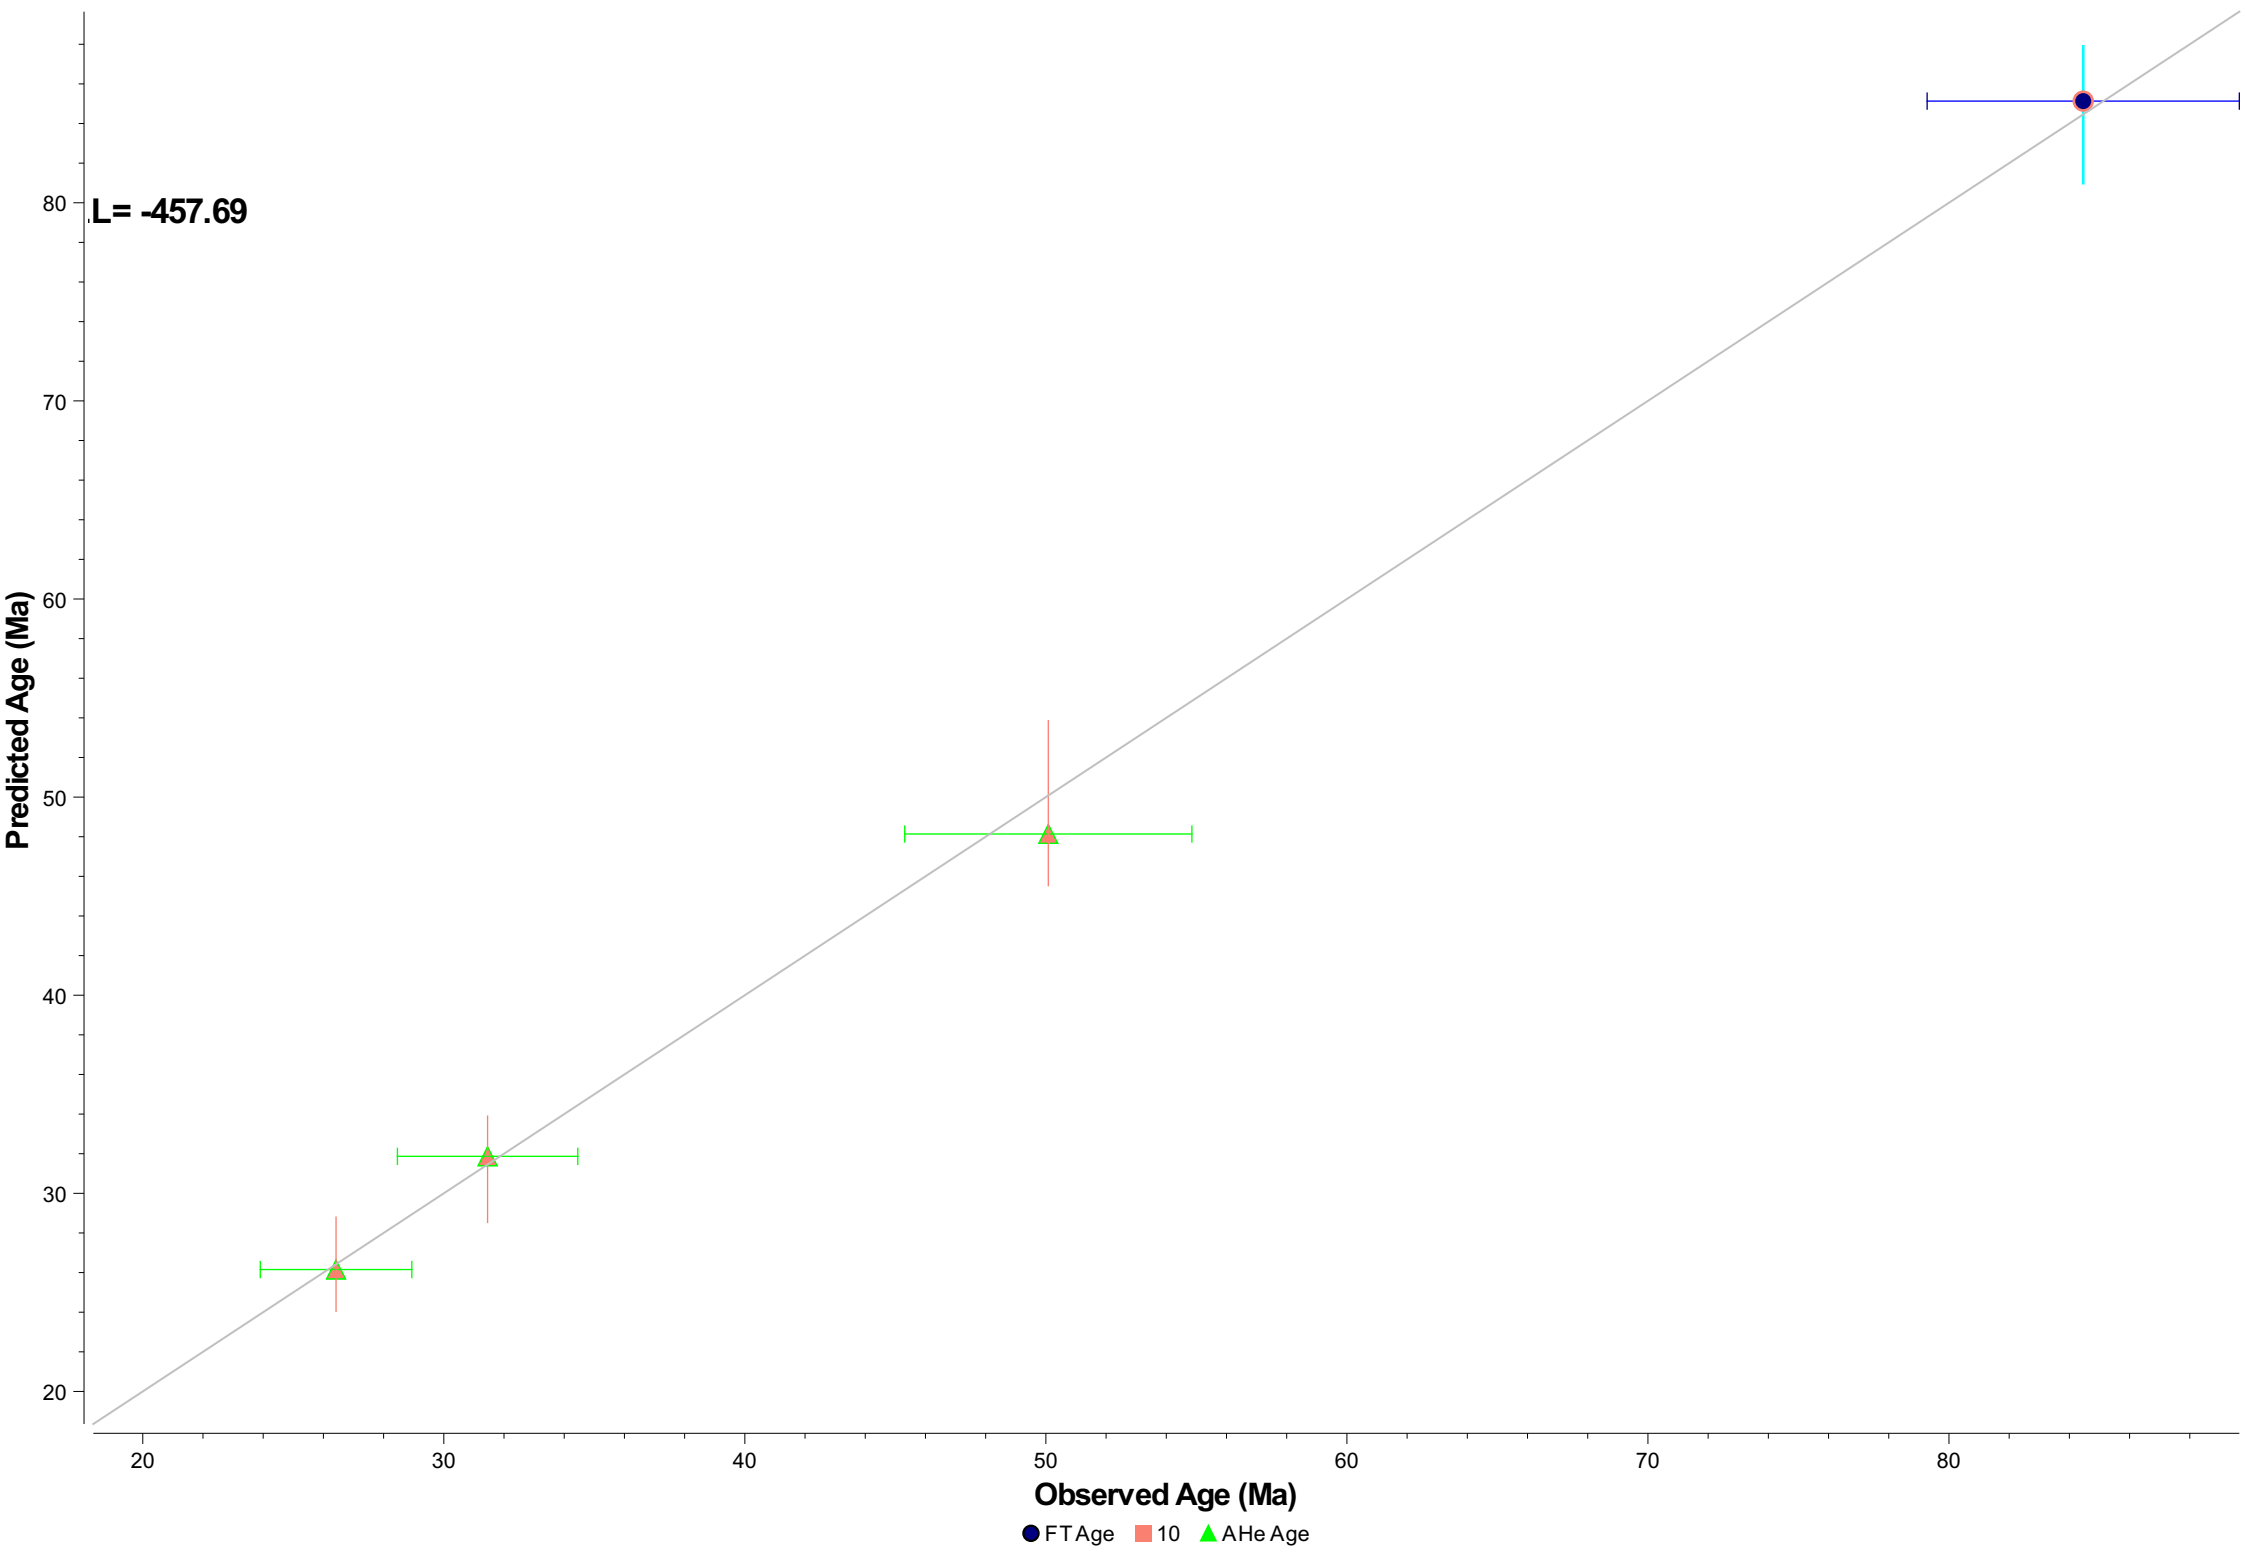

Supplement: Supplementary file 13 [file 1]

# Exercise4\_GROUPD-1\_3\_Exercise4\_InputData.txt 10.00m : Max. Like

No. of tracks (m)

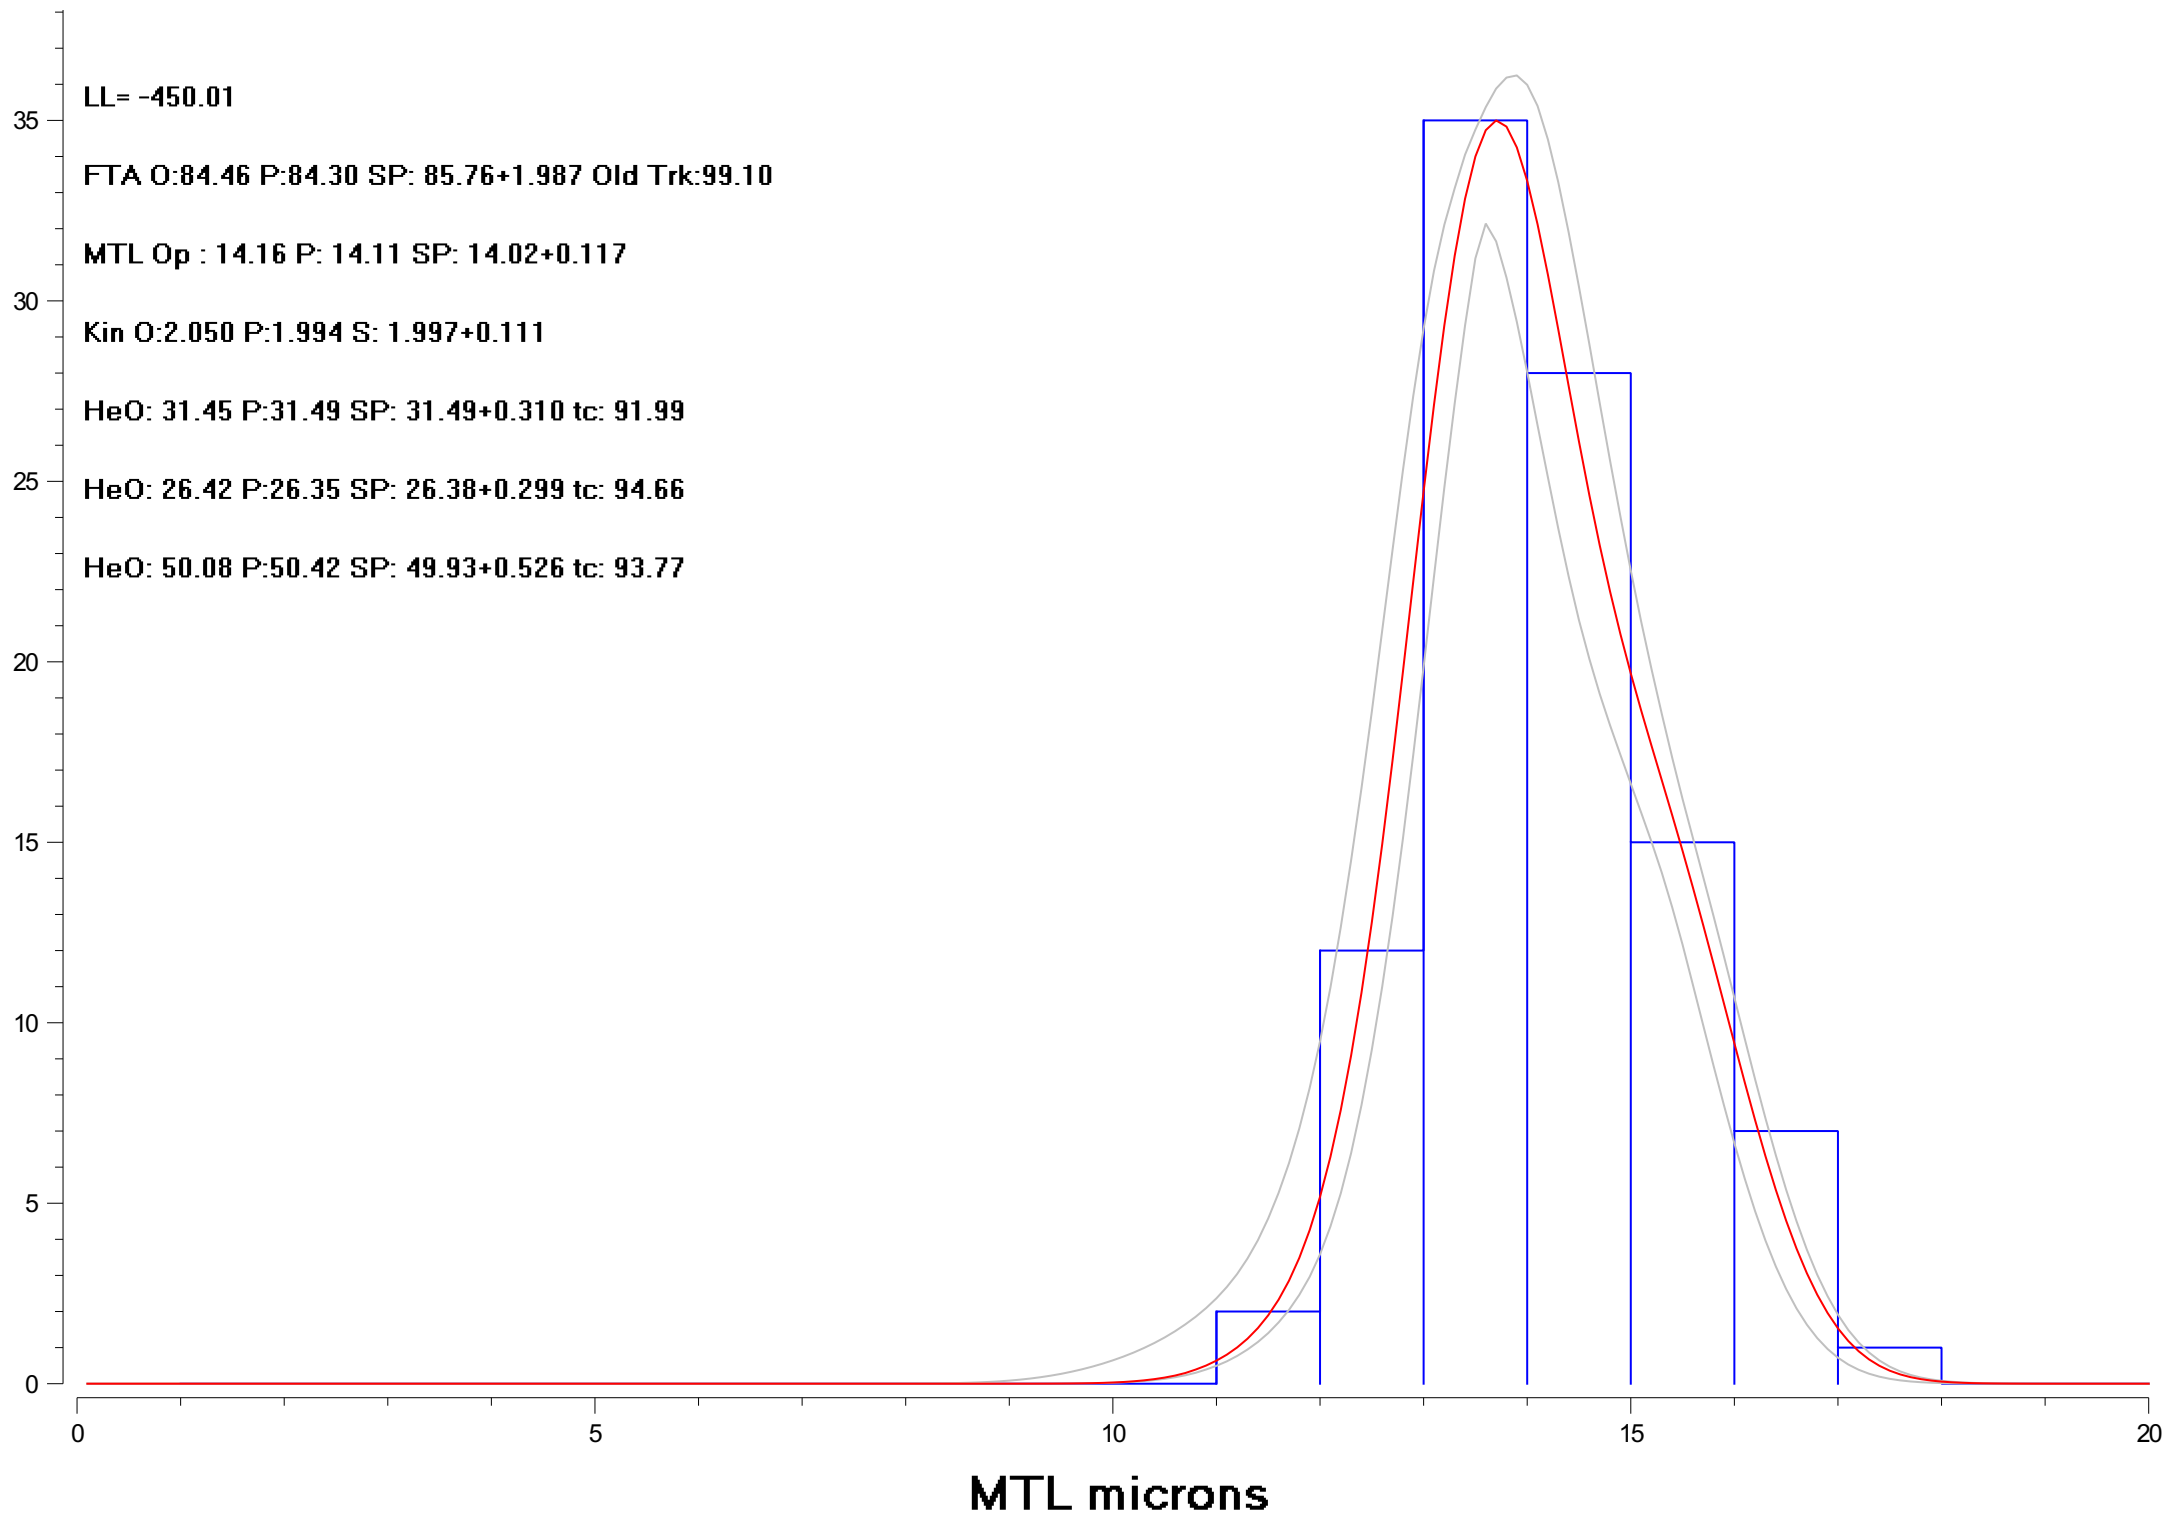

Supplement: Supplementary file 14 [file 1]

# Exercise4\_GROUPA-2\_3 : Max Like

Time (Ma)

Temperature (C)

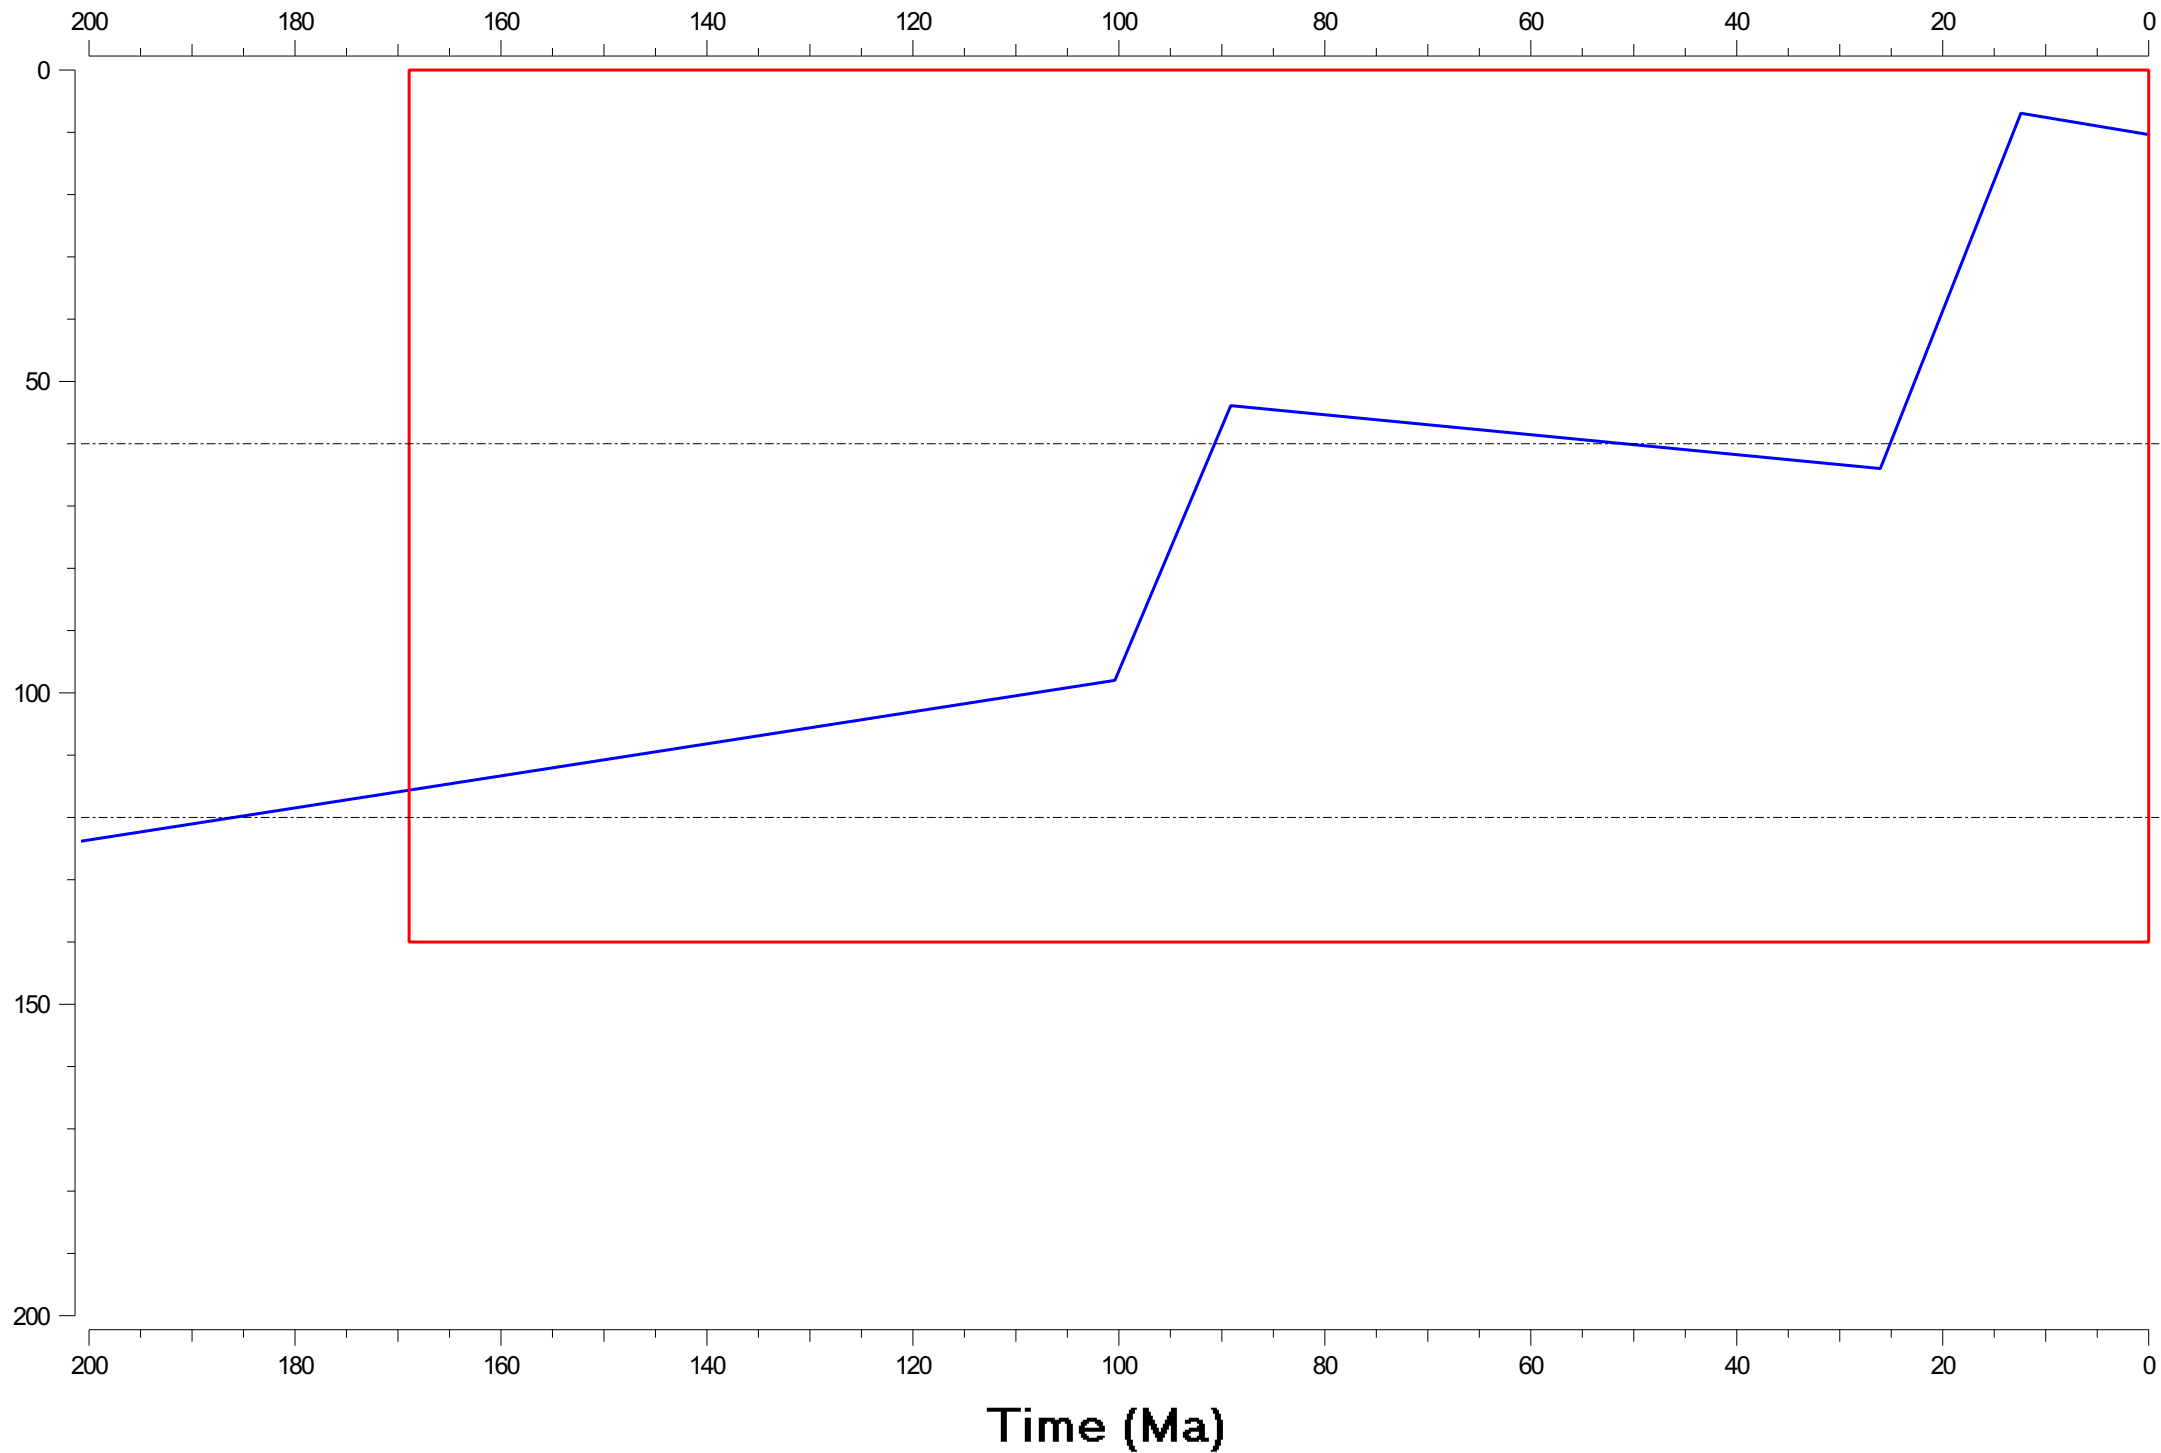

Supplement: Supplementary file 15 [file 1]

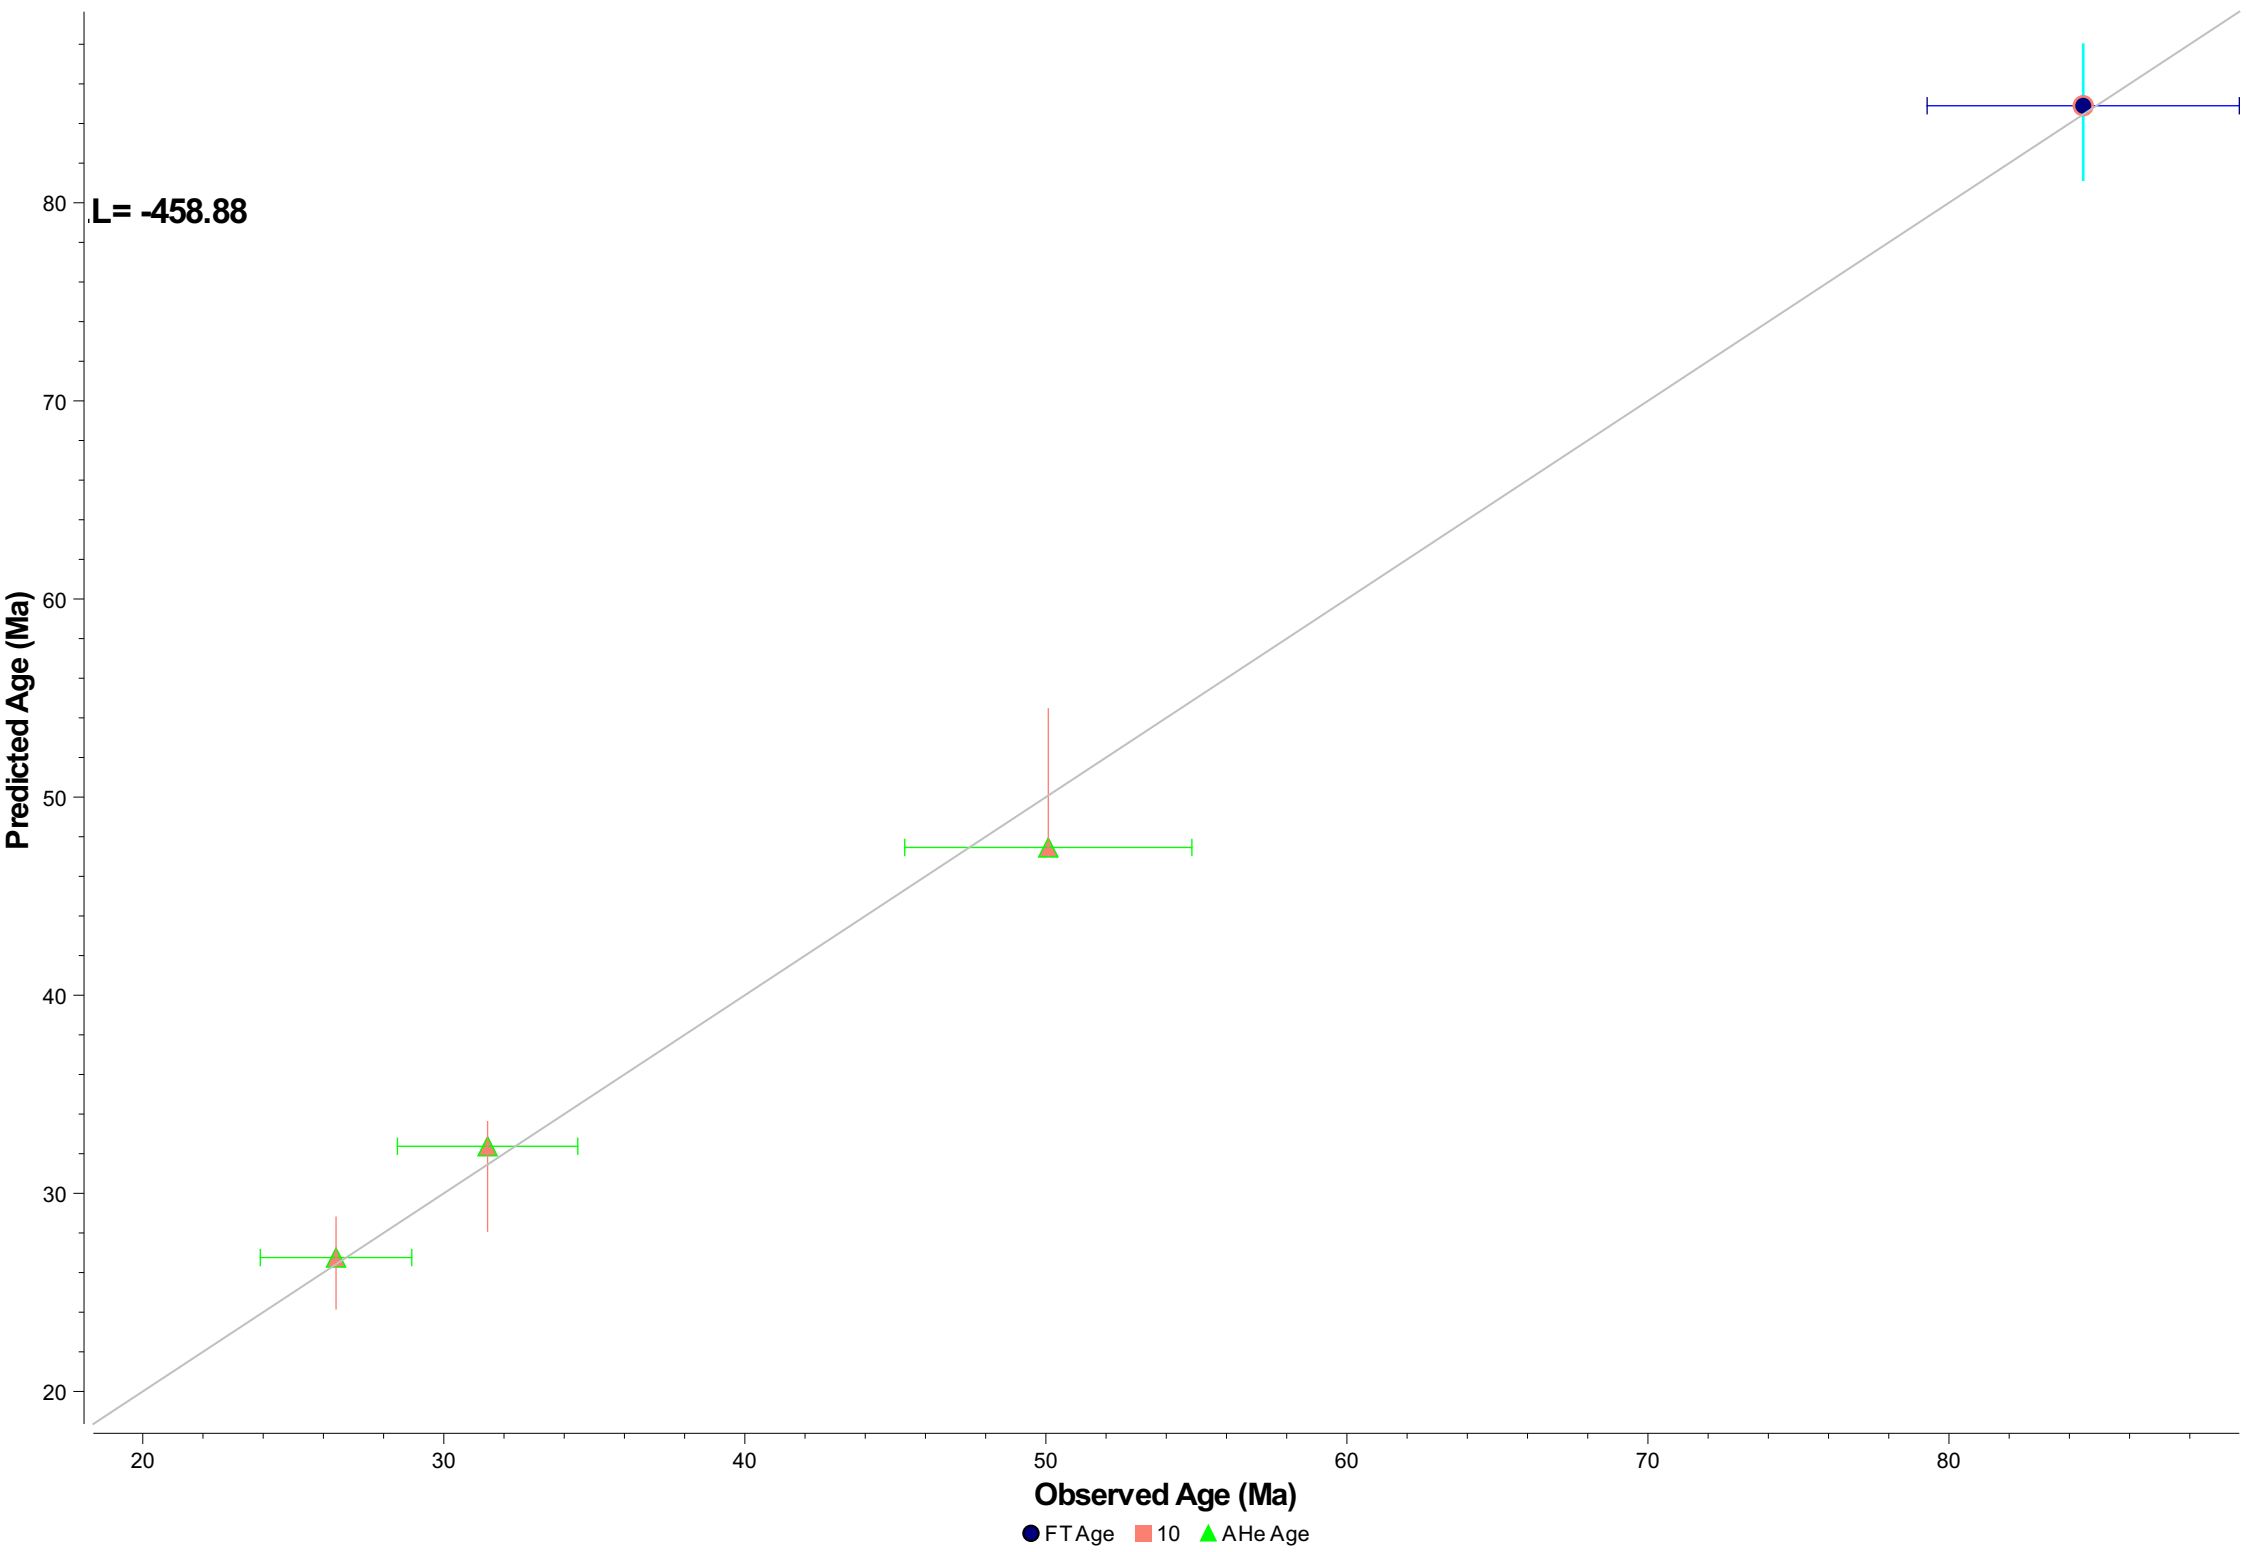

Supplement: Supplementary file 16 [file 1]

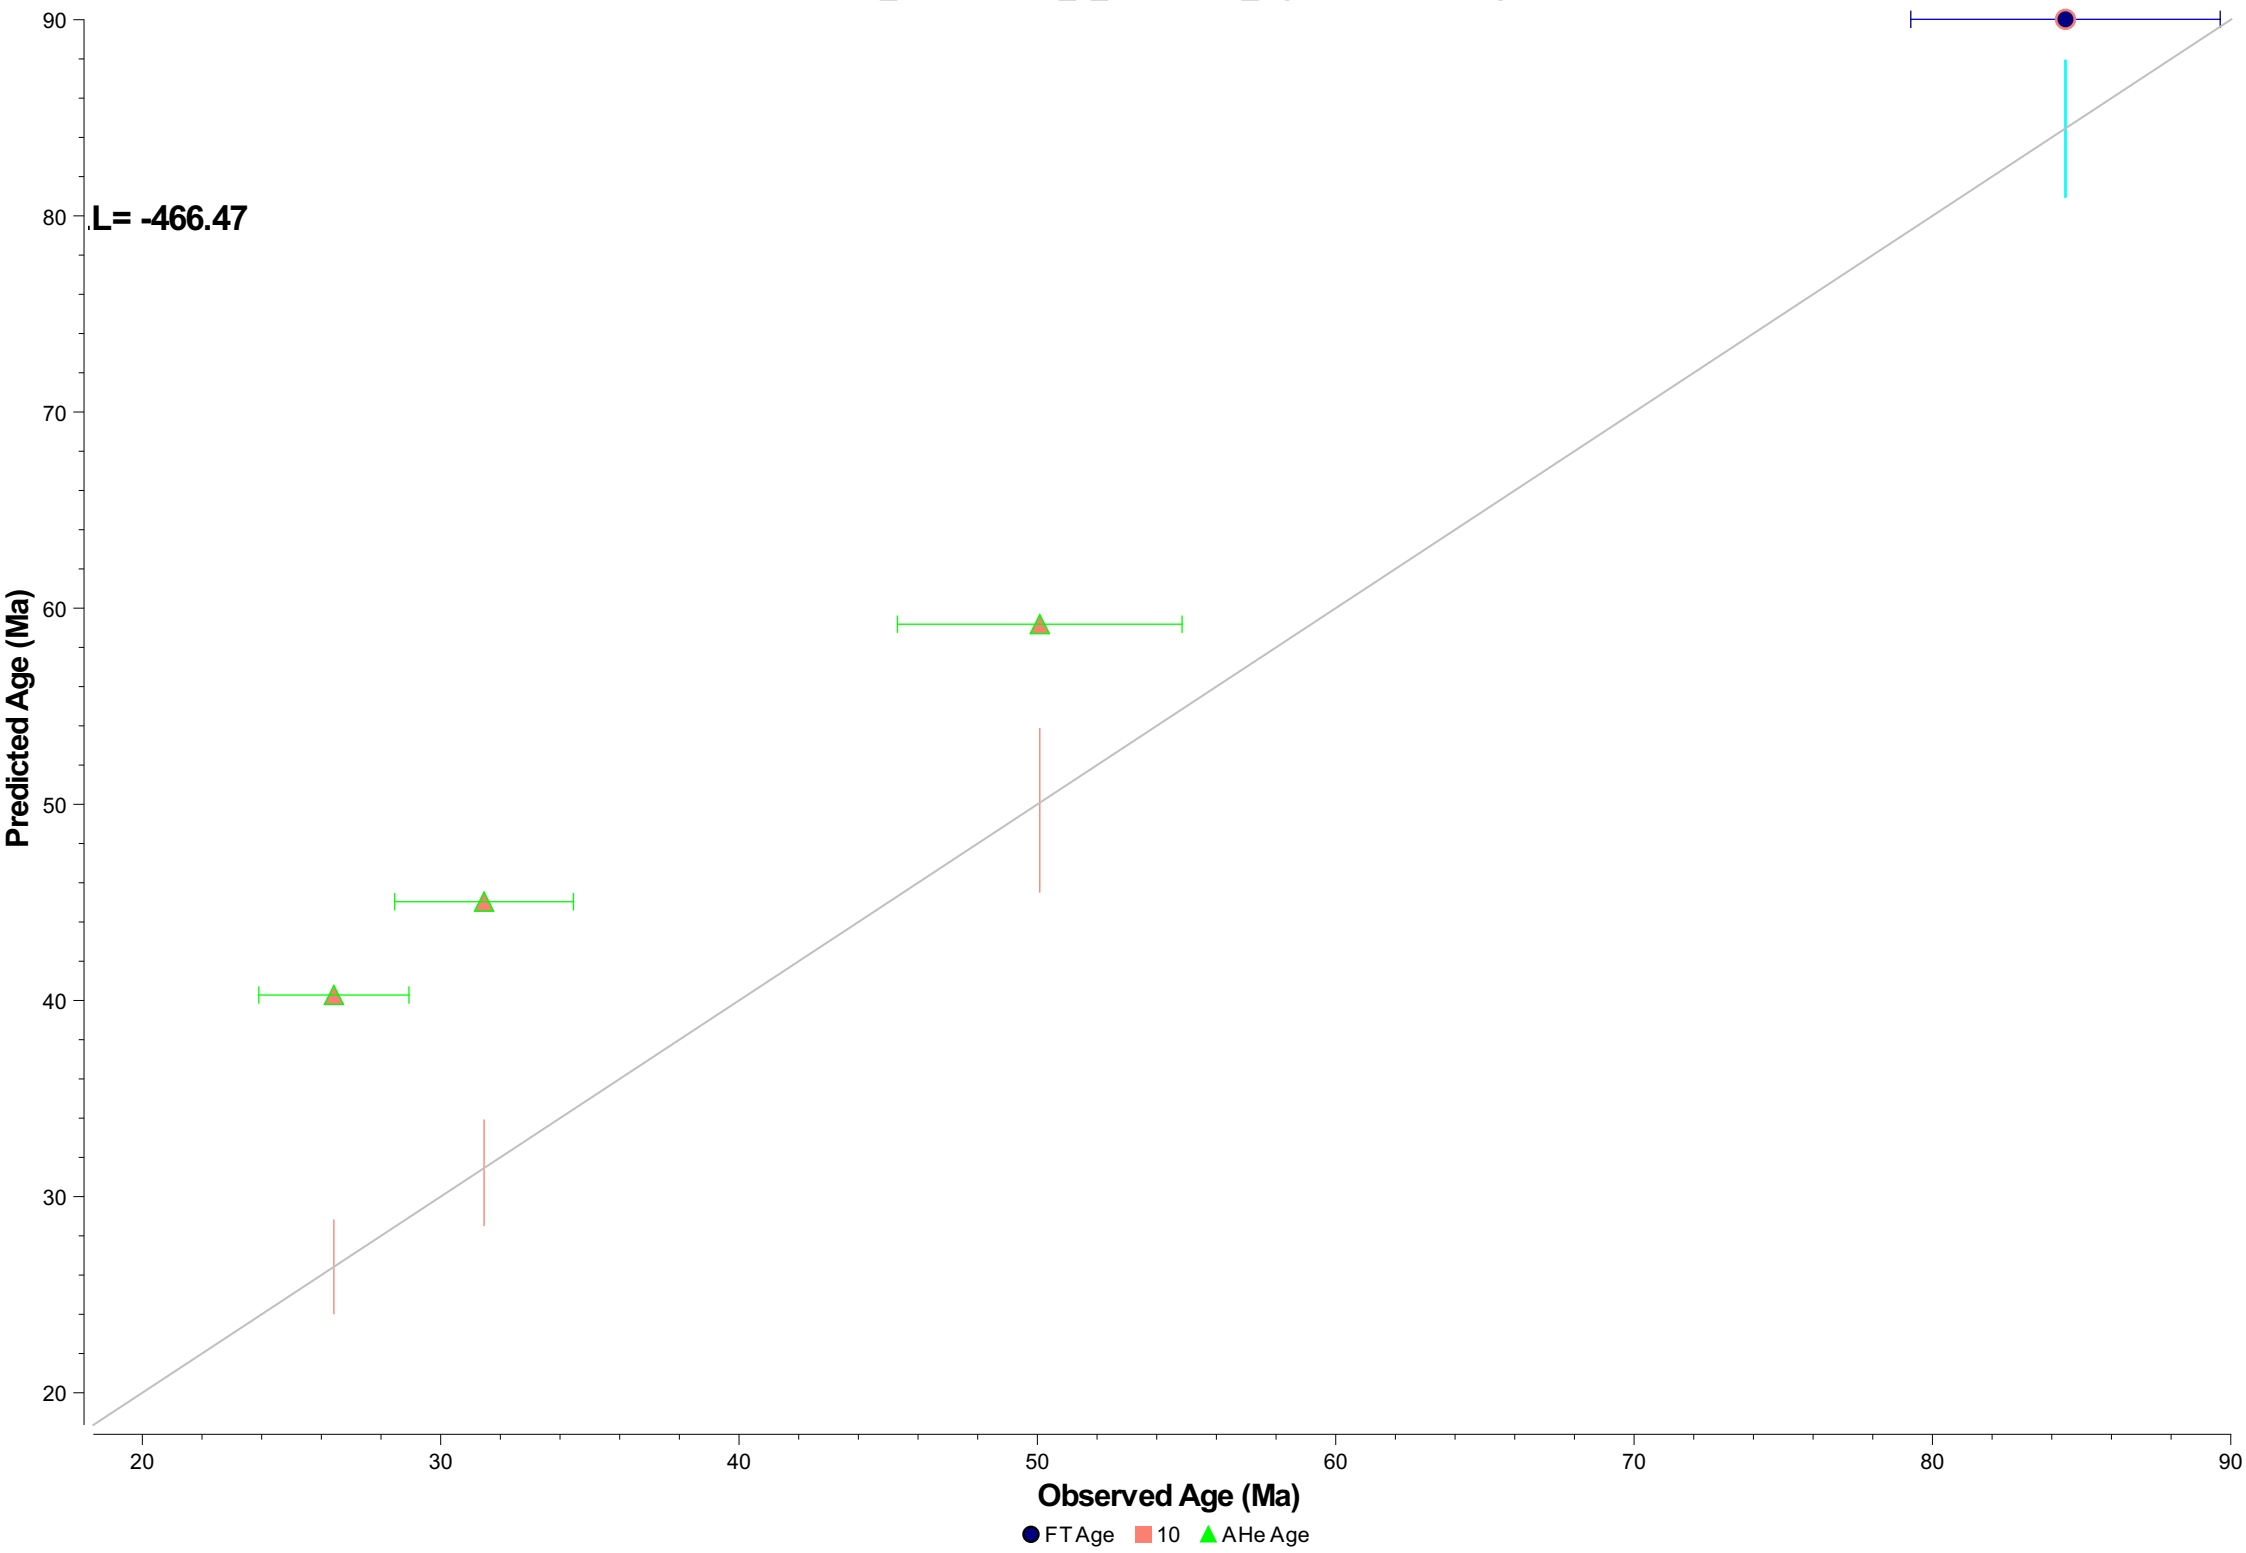

Supplement: Supplementary file 17 [file 1]

# Exercise4\_GROUPA-2\_3

Log Posterior

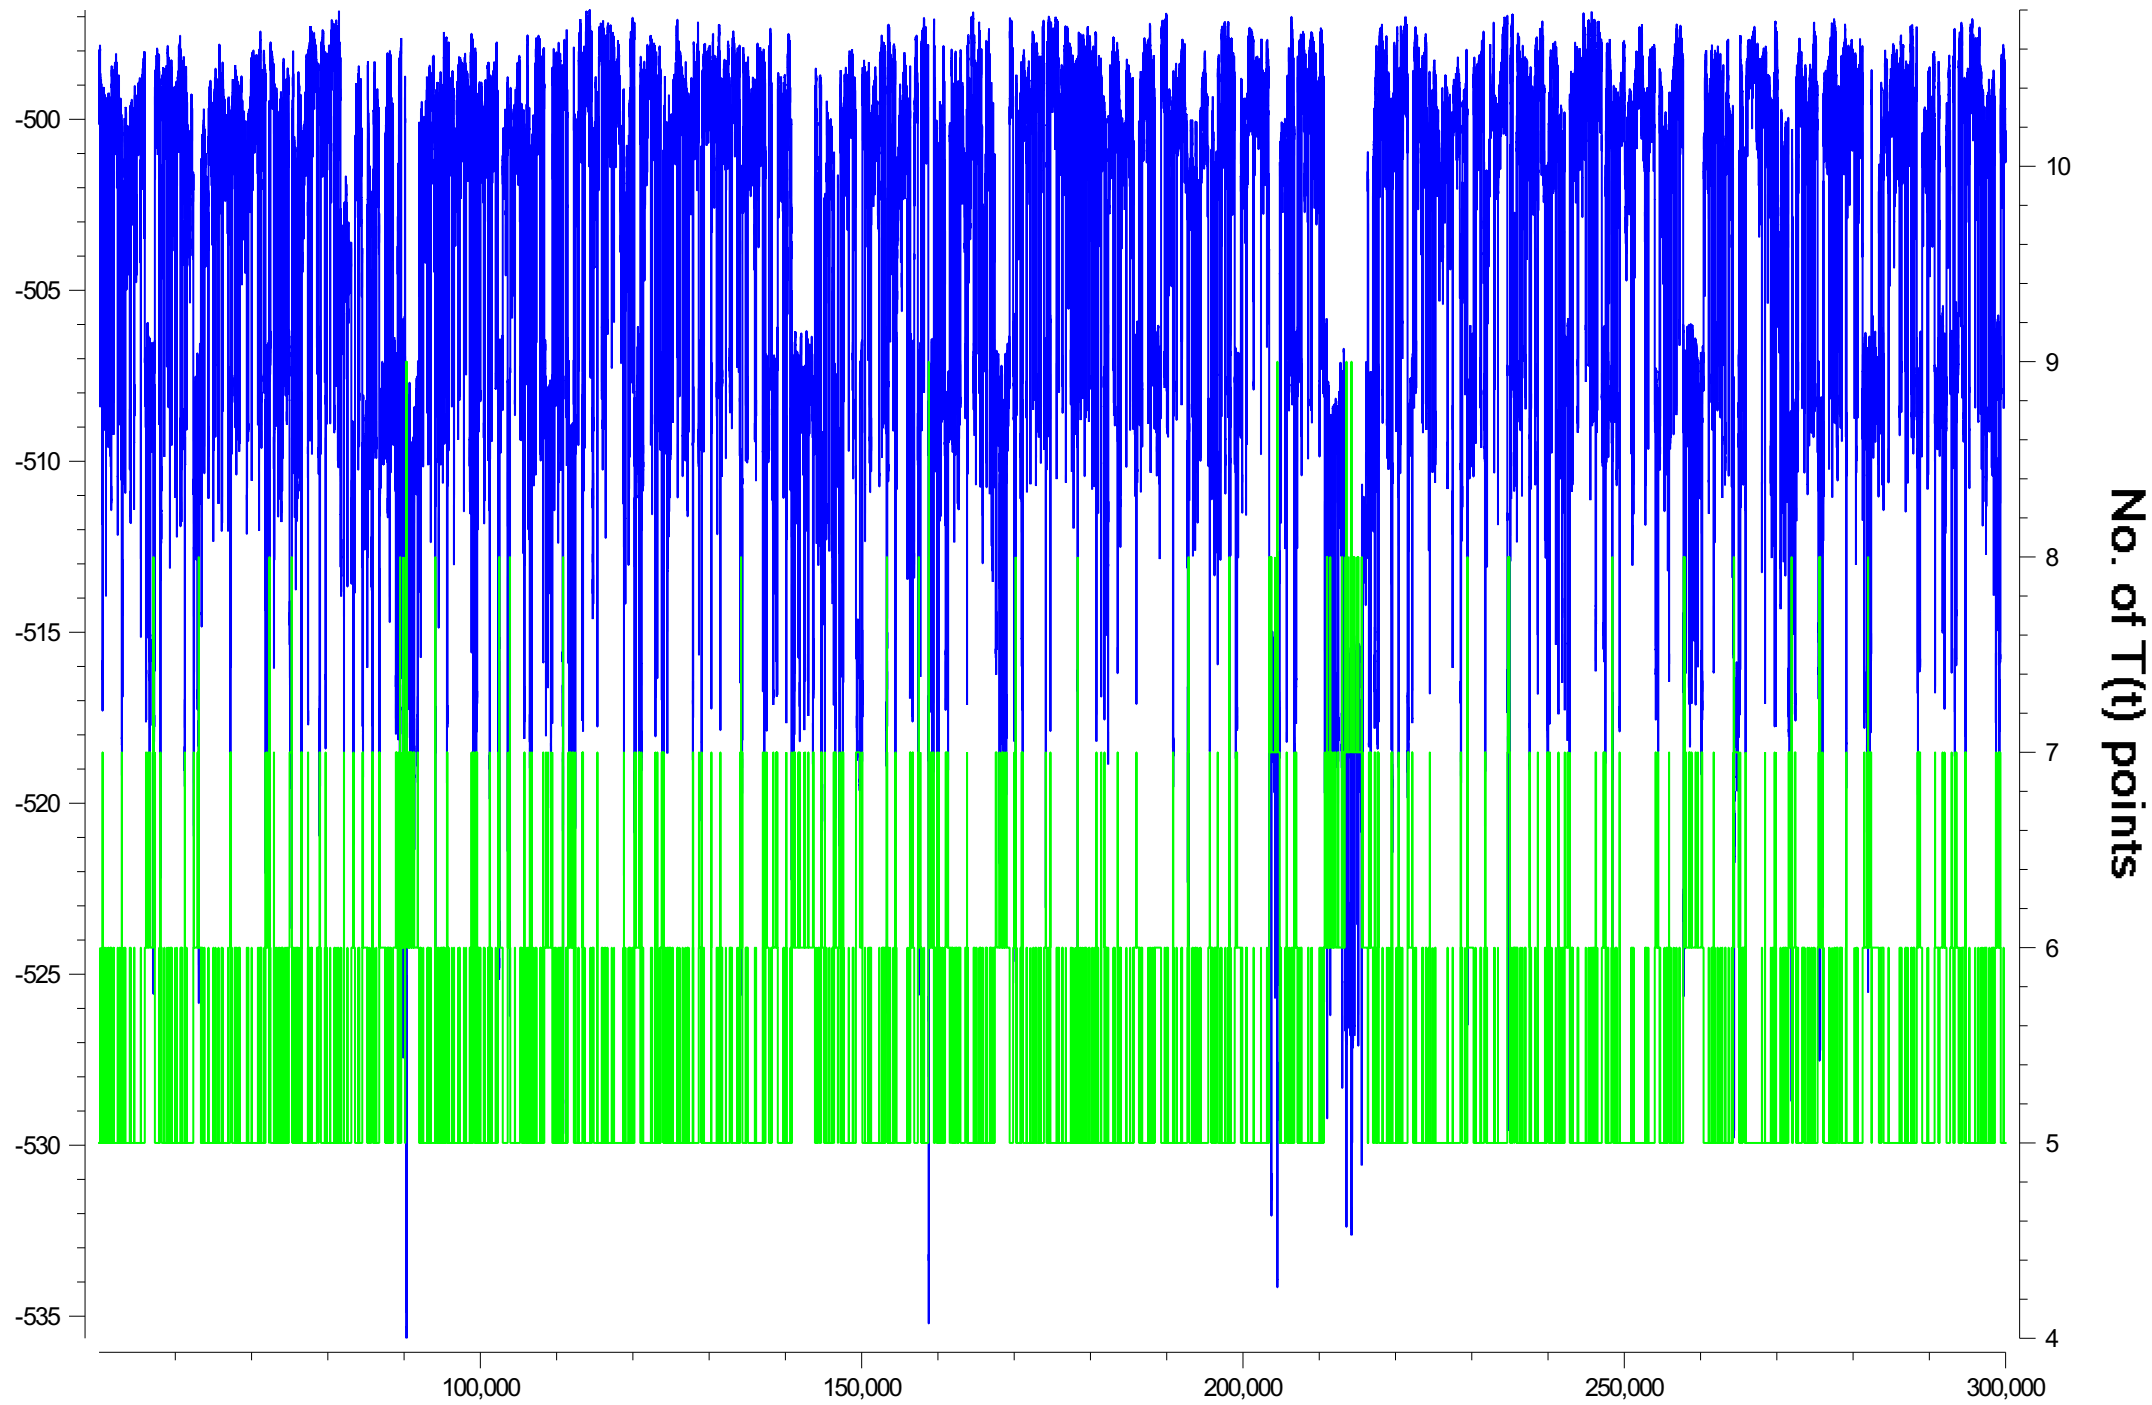

No. of  $T(t)$  points

Iteration

— Posterior — Nb. of  $T(t)$  points

Supplement: Supplementary file 18 [file 1]

# Exercise4\_GROUPB-1\_3 : EXPECTED

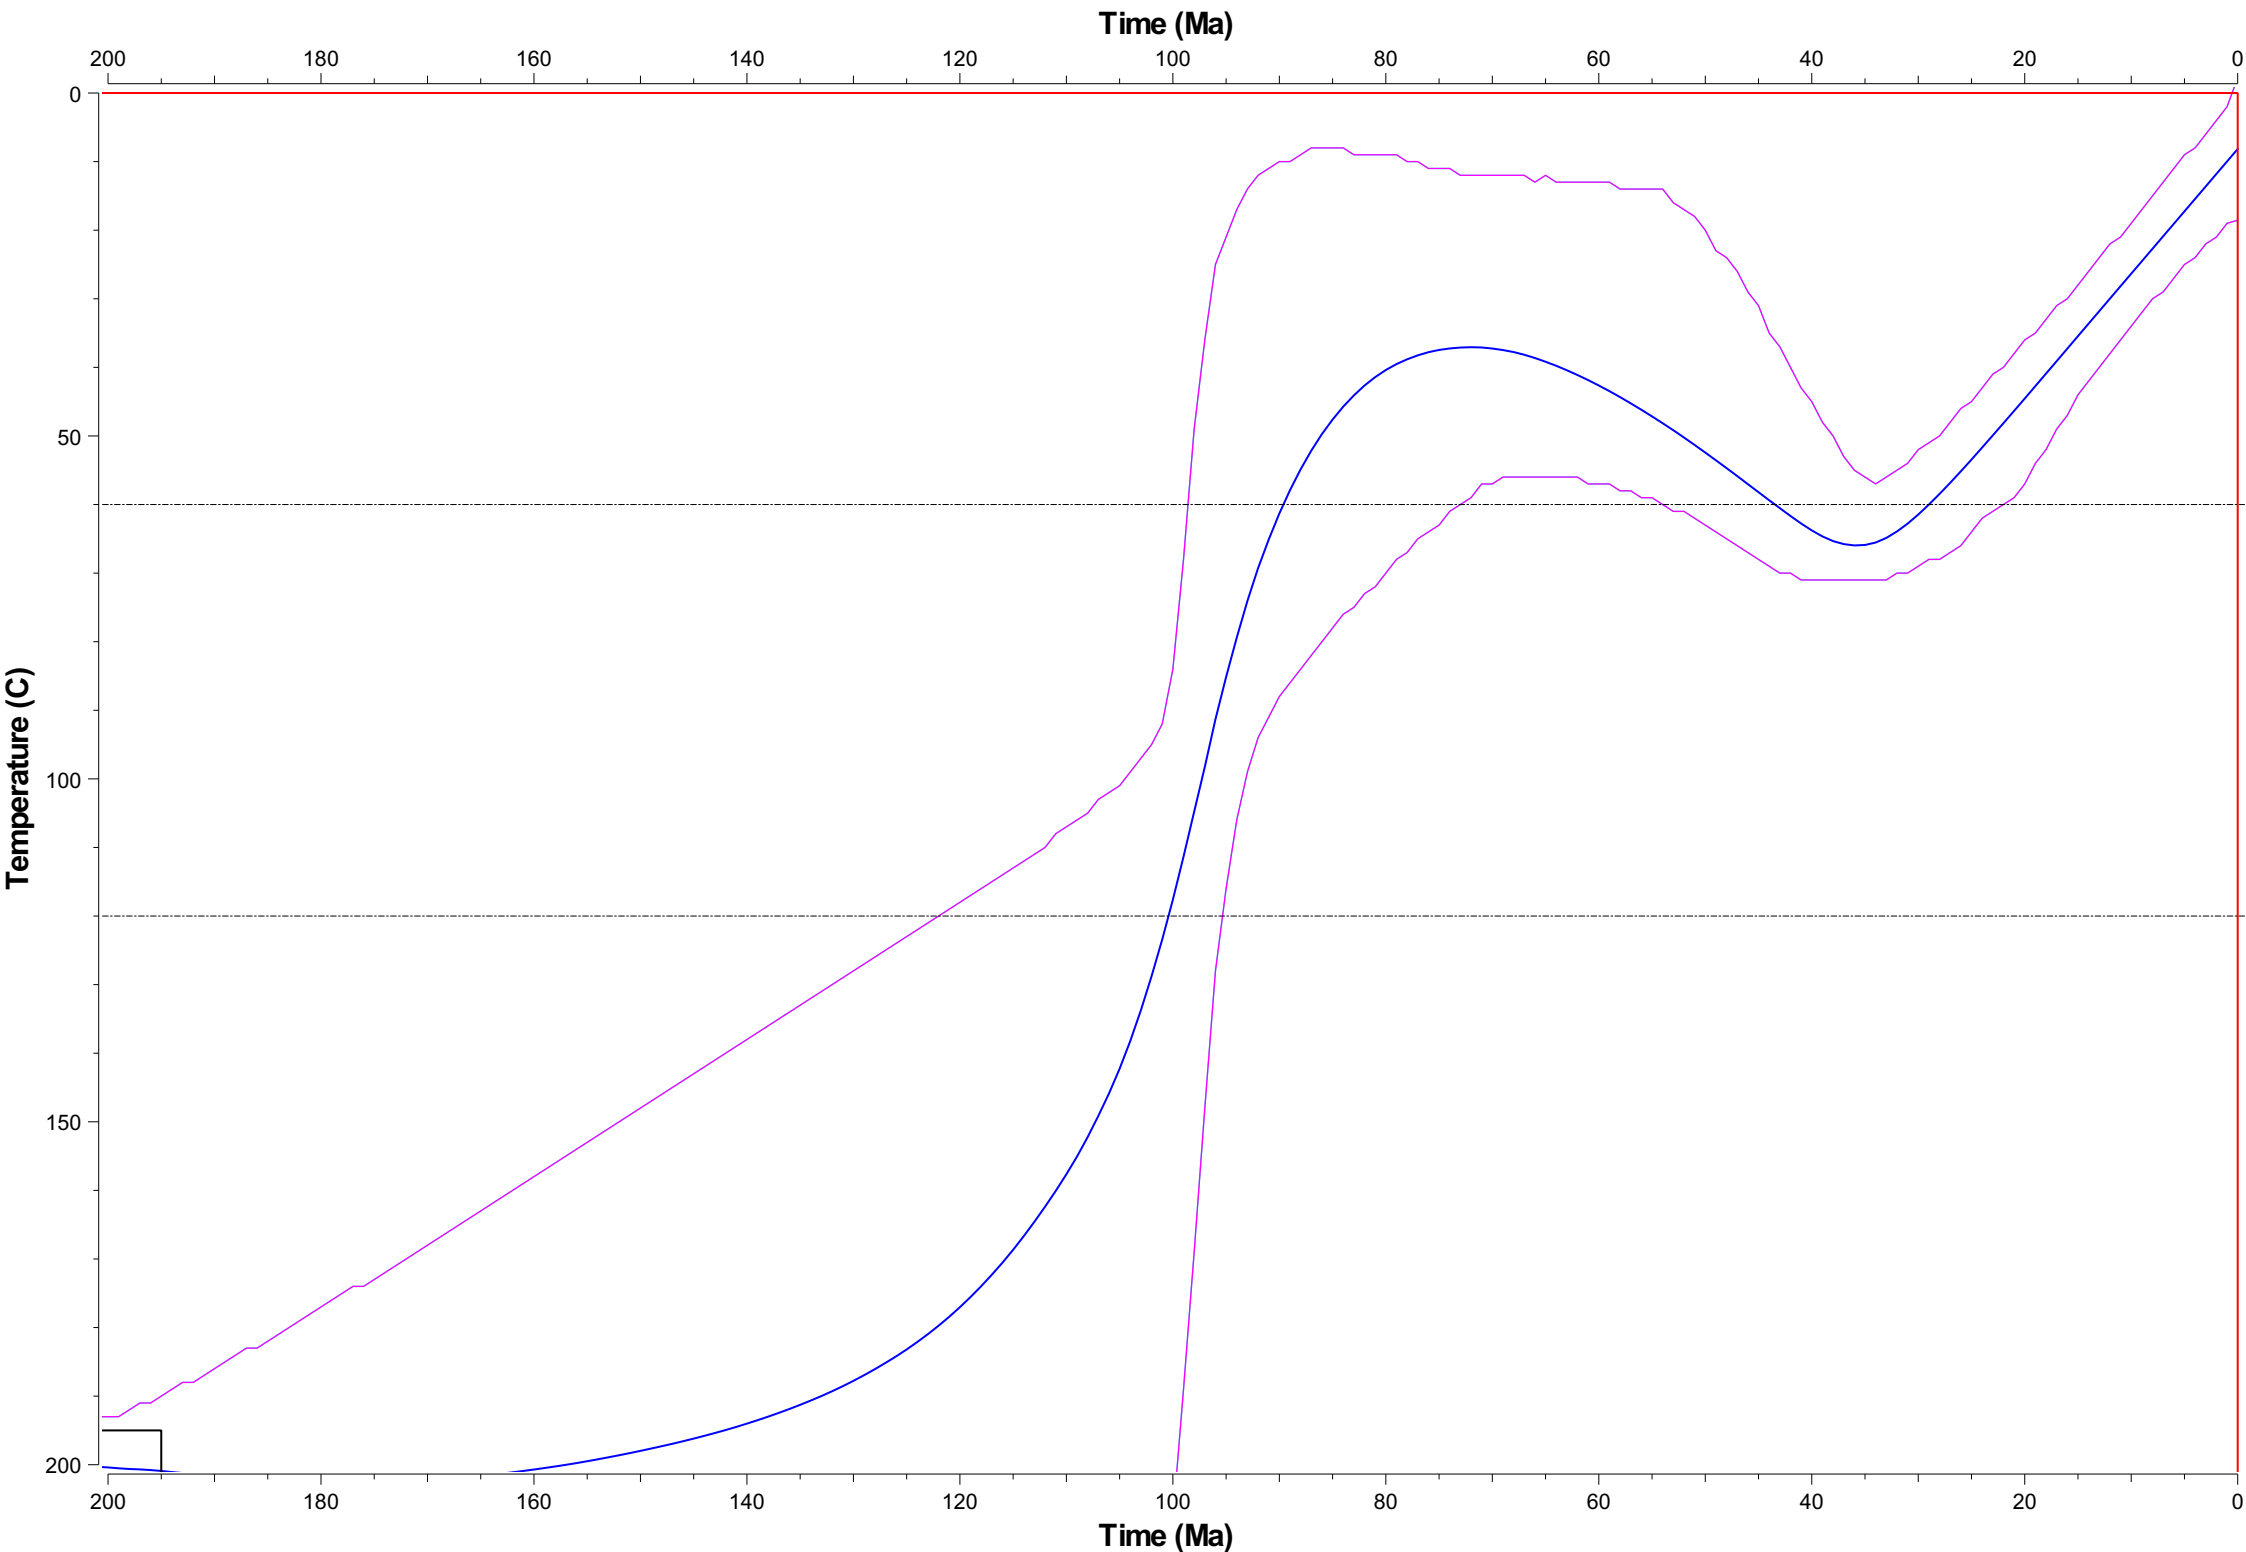

Supplement: Supplementary file 19 [file 1]

# Exercise4\_GROUPD-1\_3 : Max Like

Time (Ma)

Temperature (C)

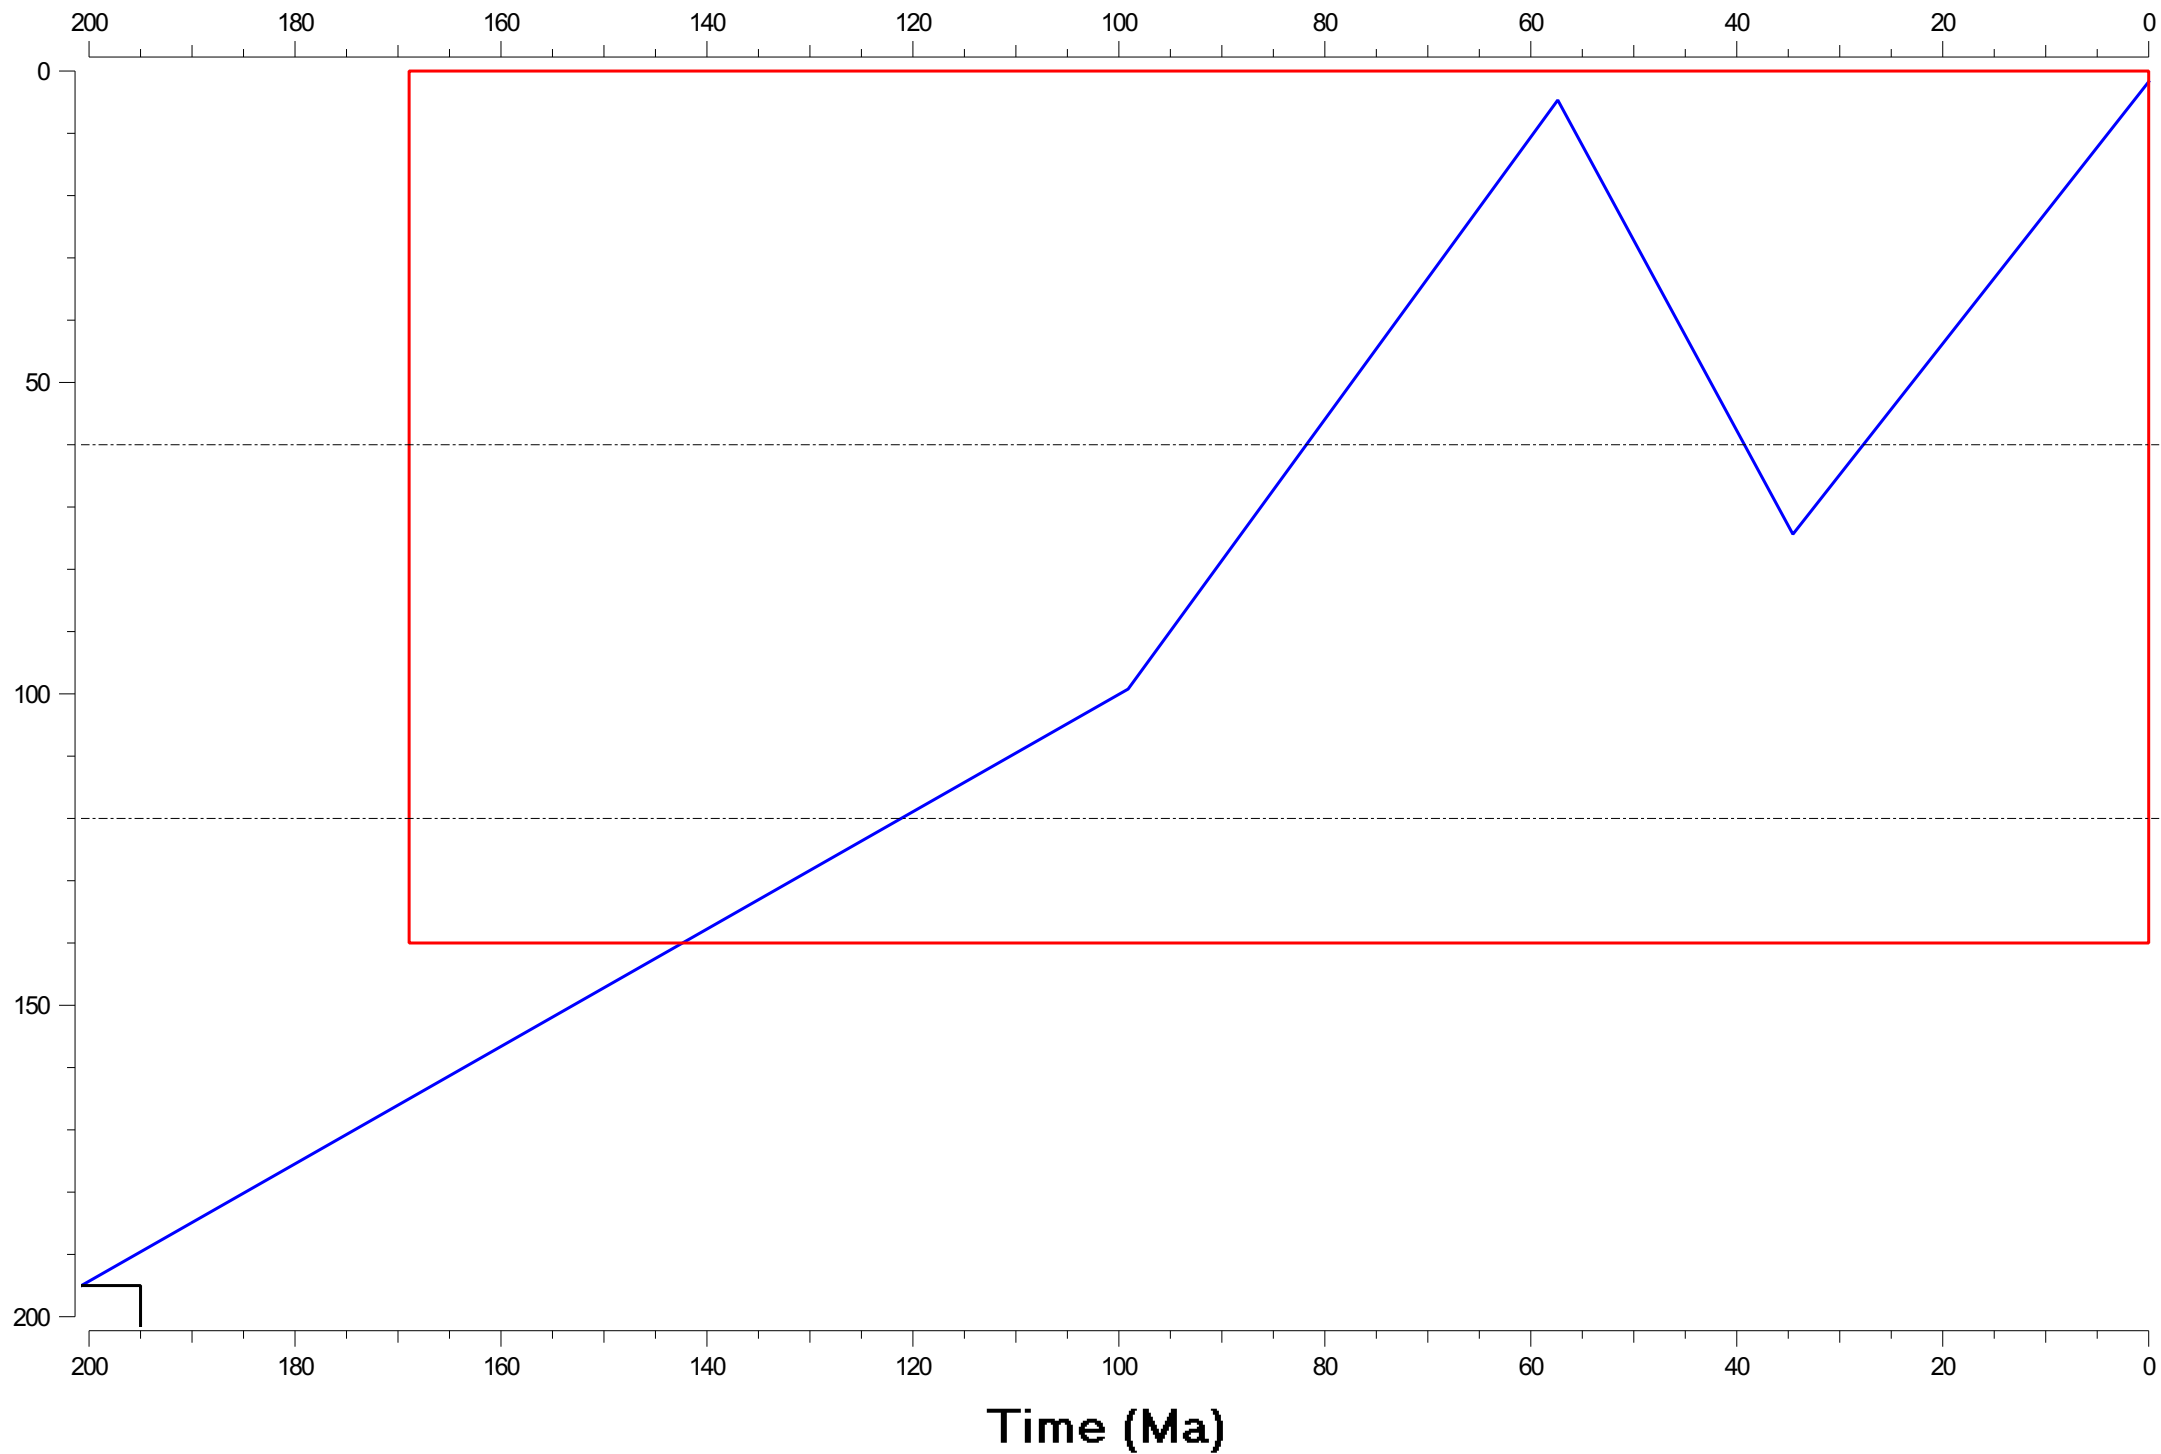

Supplement: Supplementary file 21 [file 1]

# Exercise4\_GROUPA-1\_3\_Exercise4\_InputData.txt : Expected

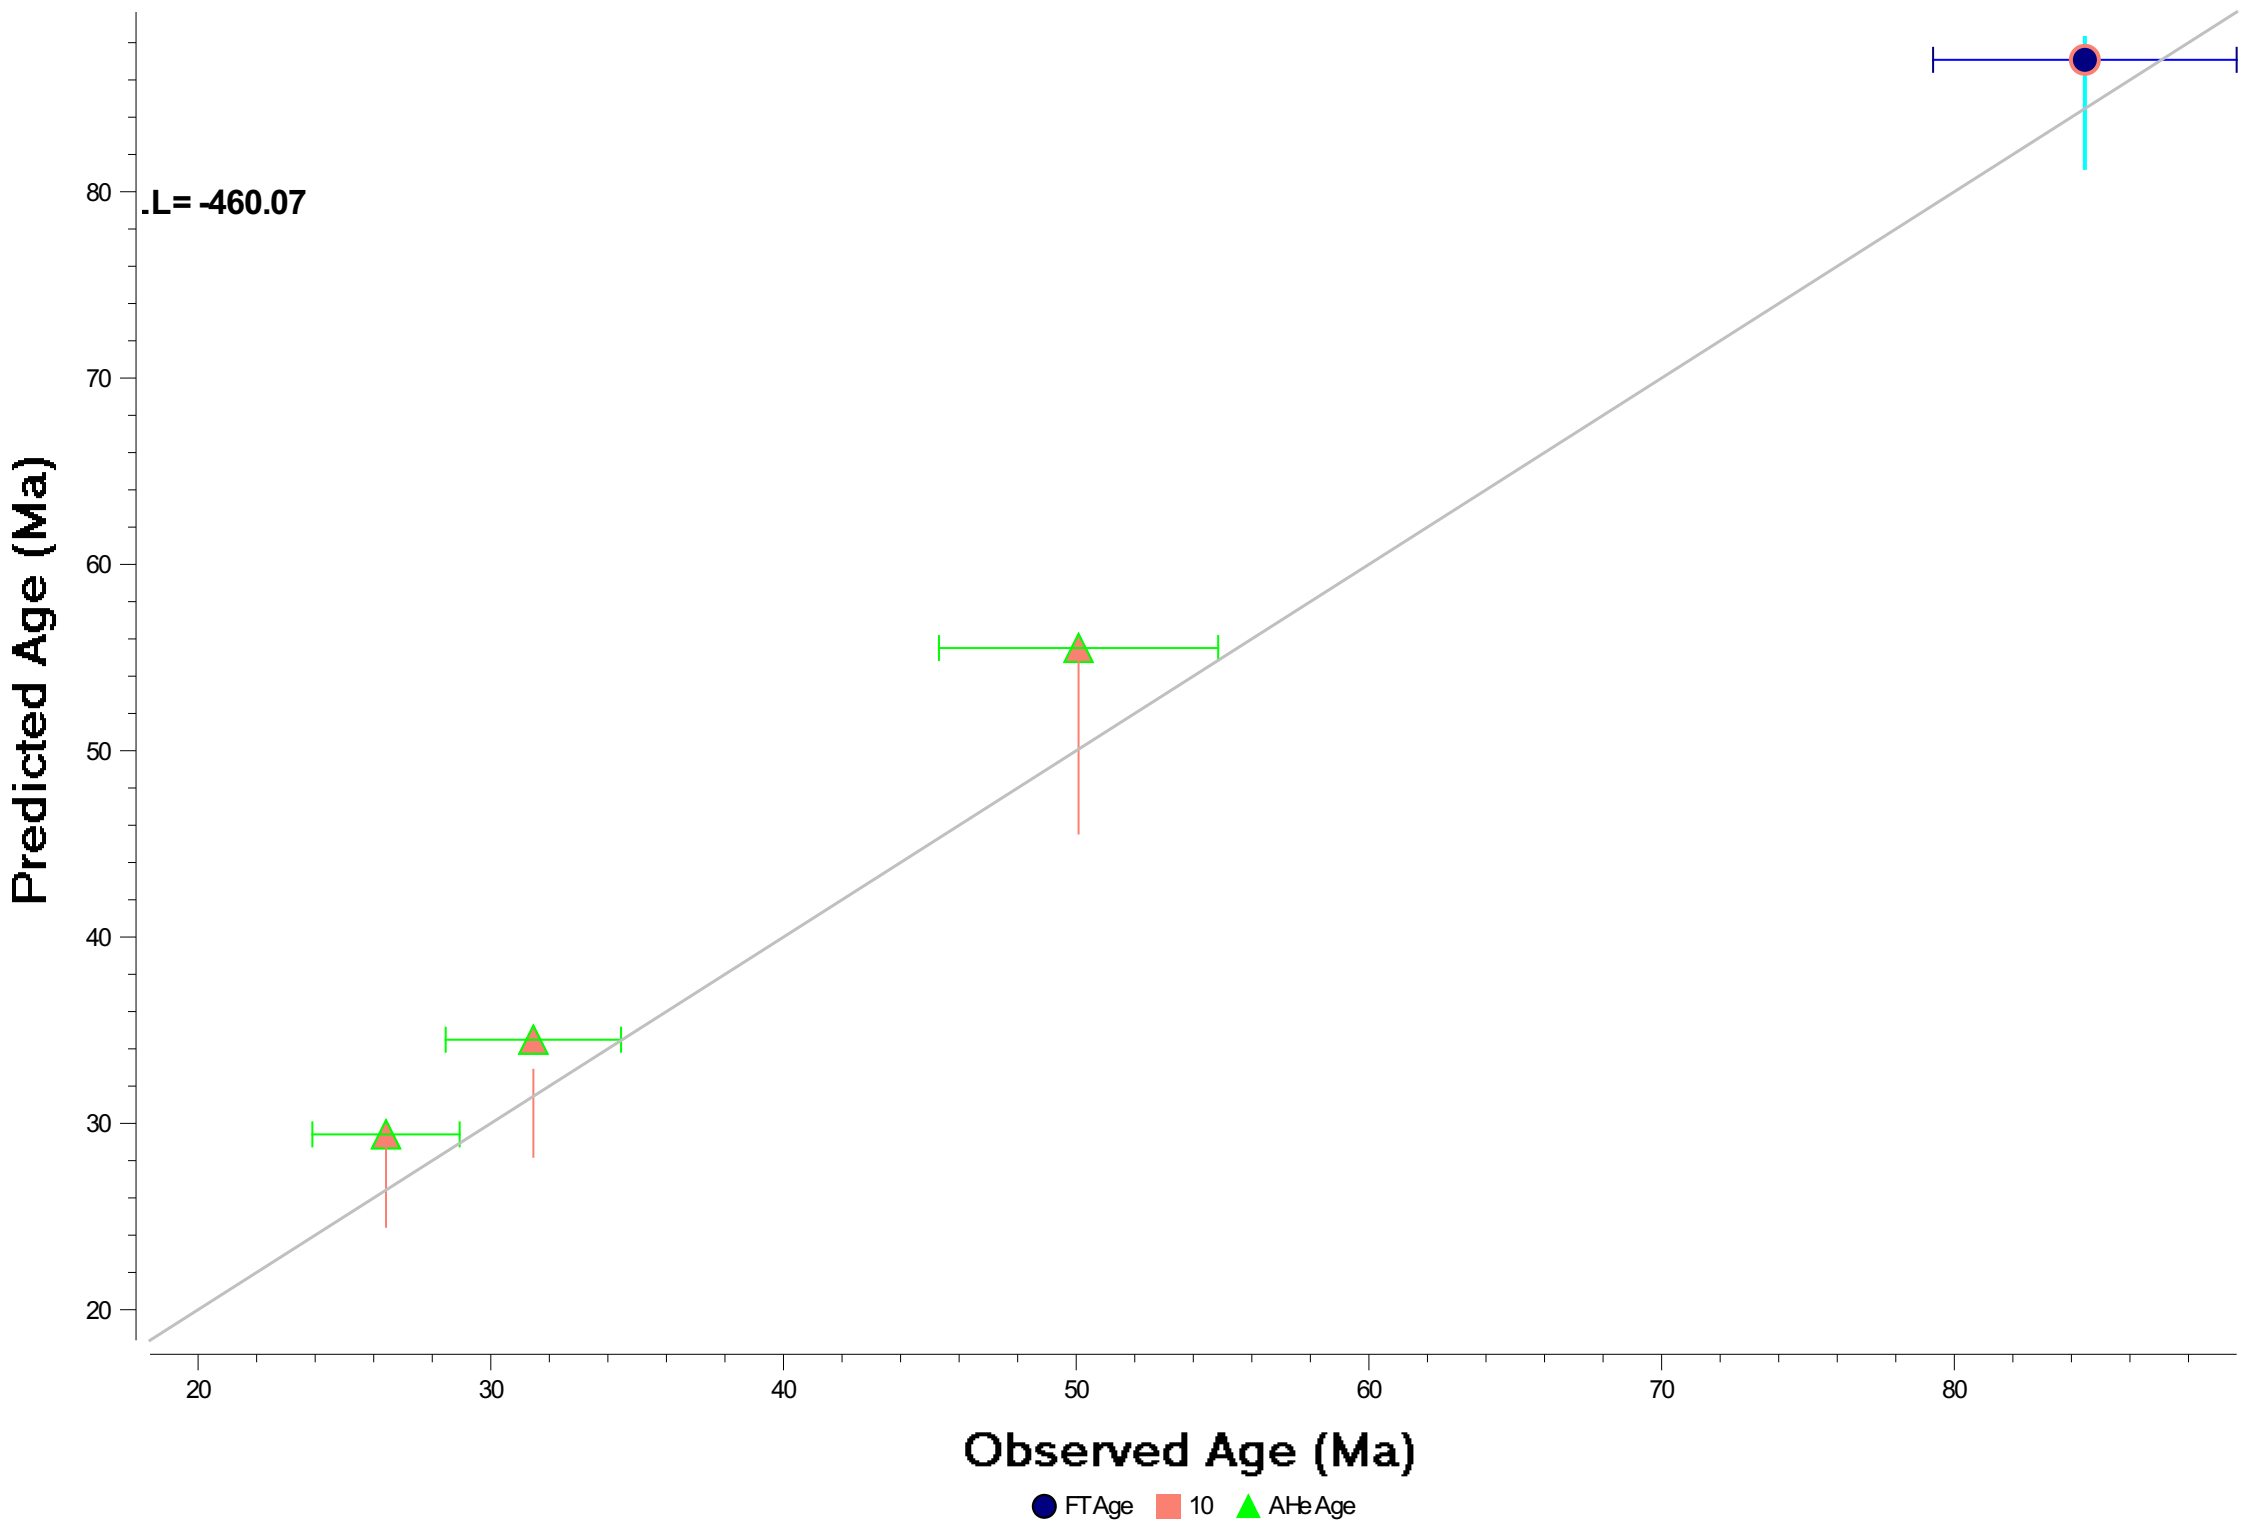

Supplement: Supplementary file 22 [file 1]

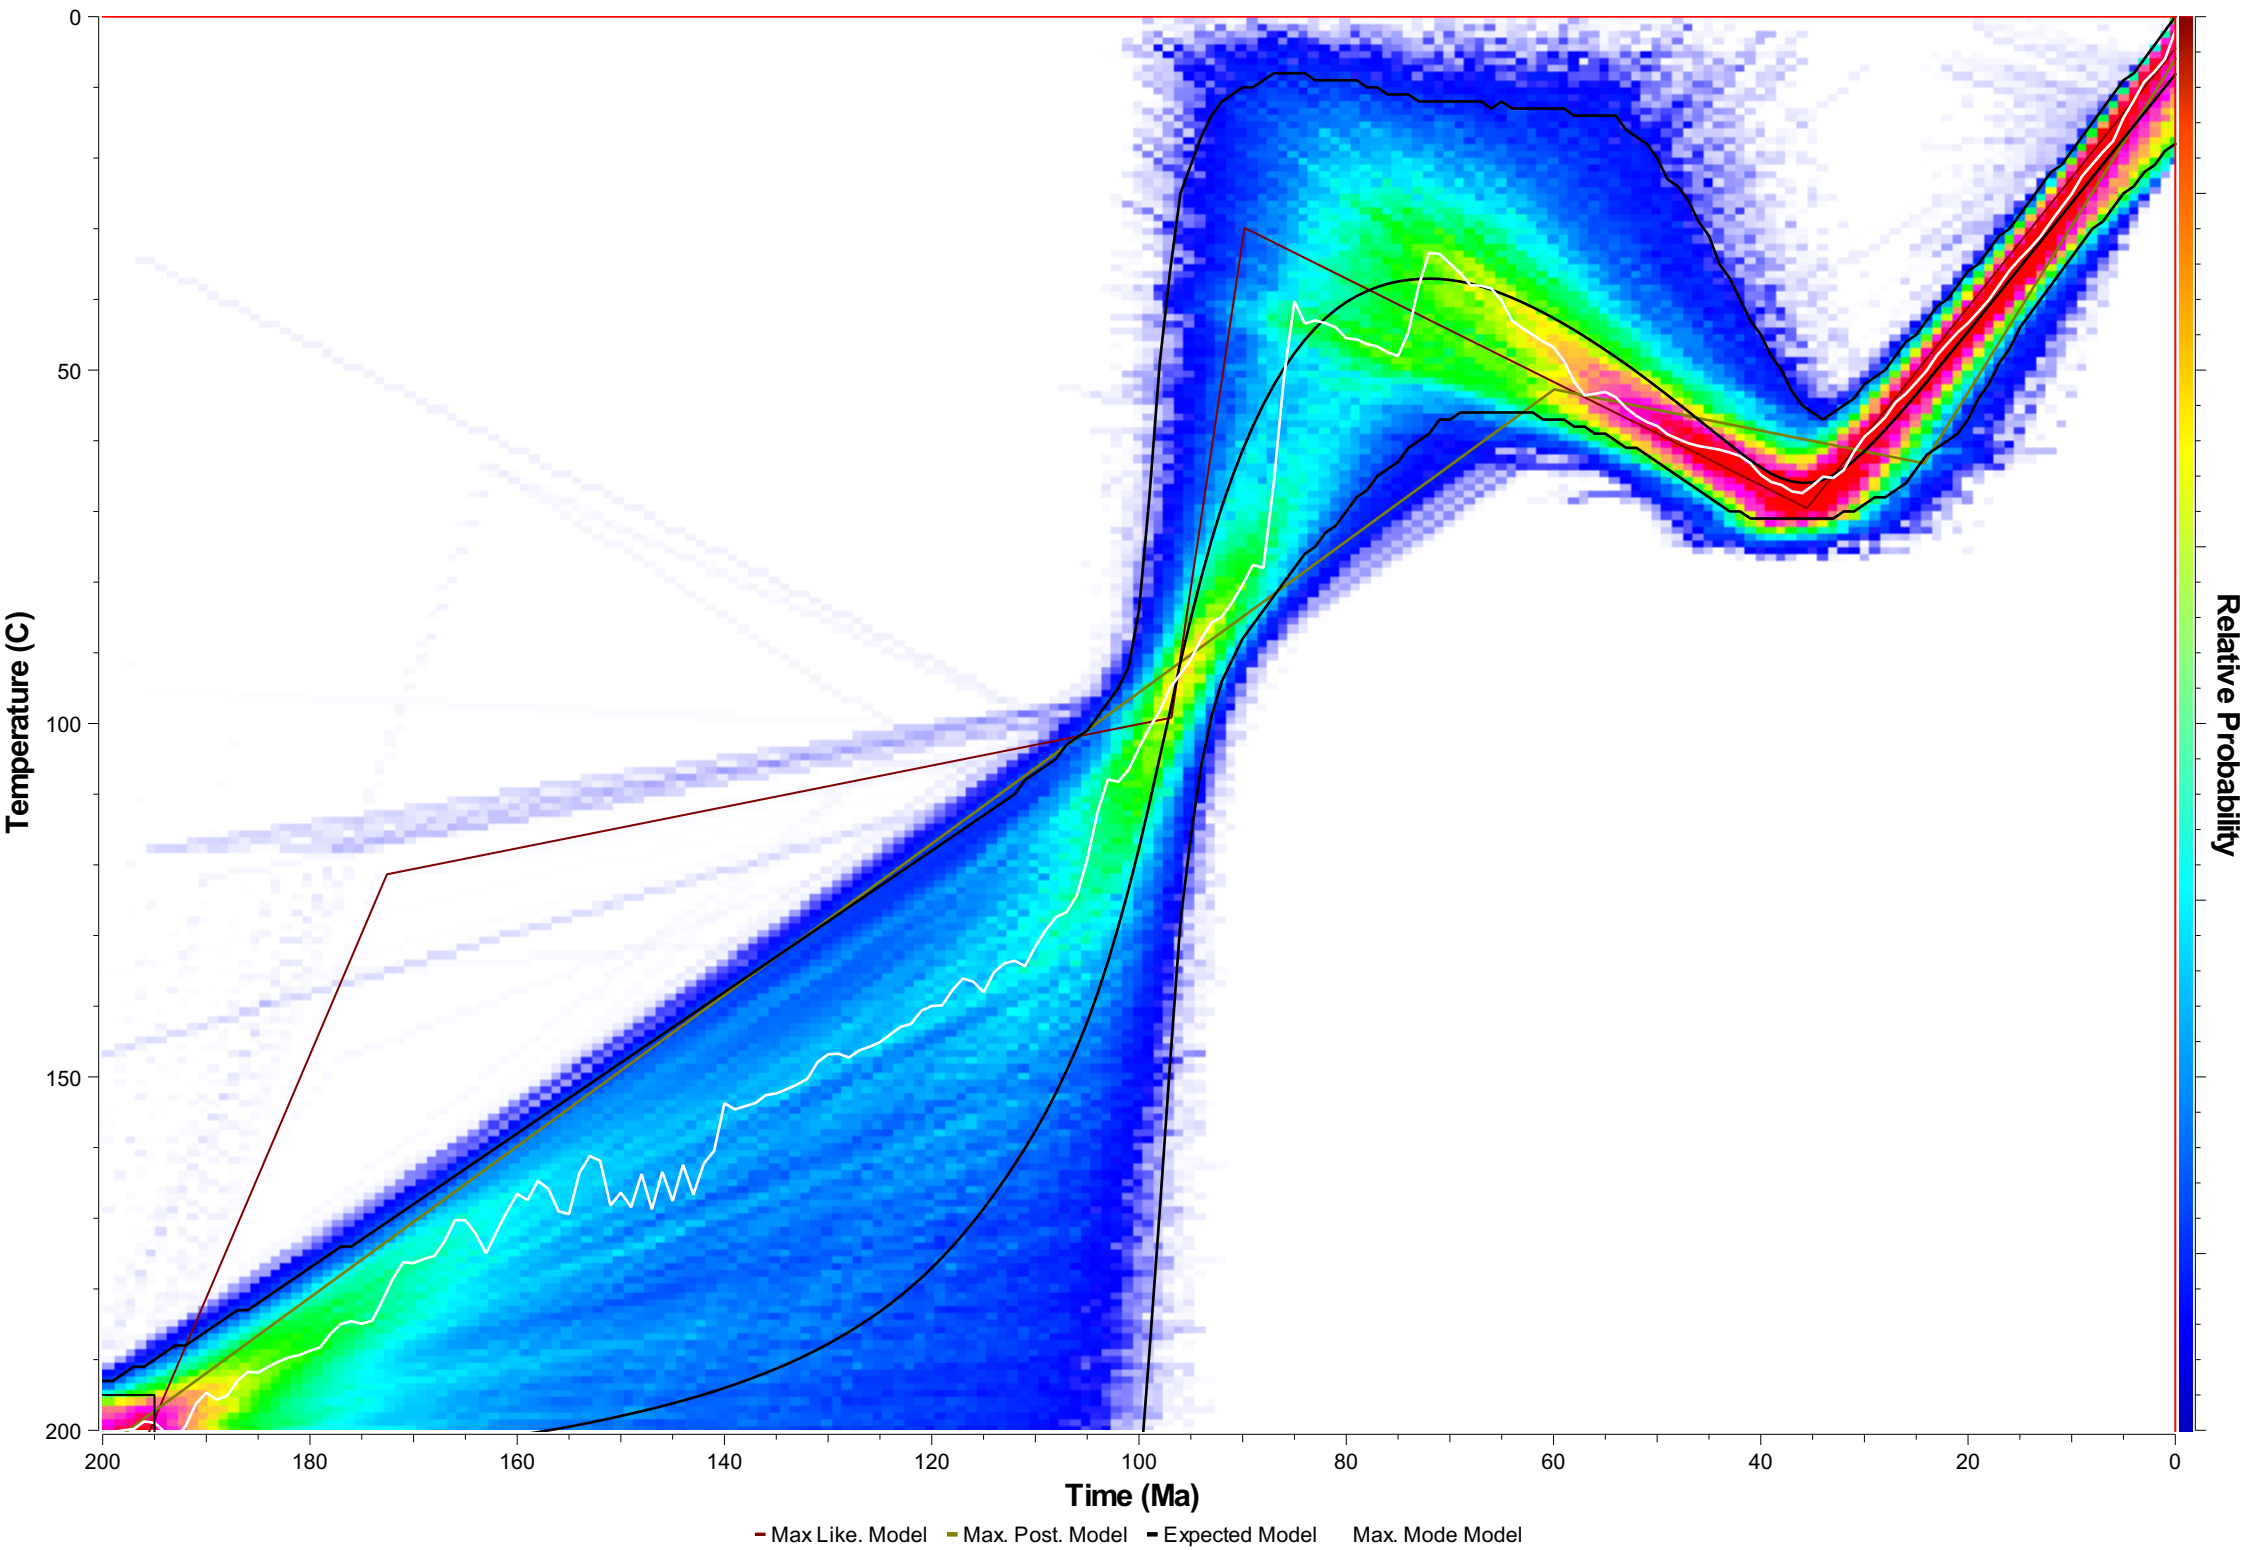

Supplement: Supplementary file 23 [file 1]

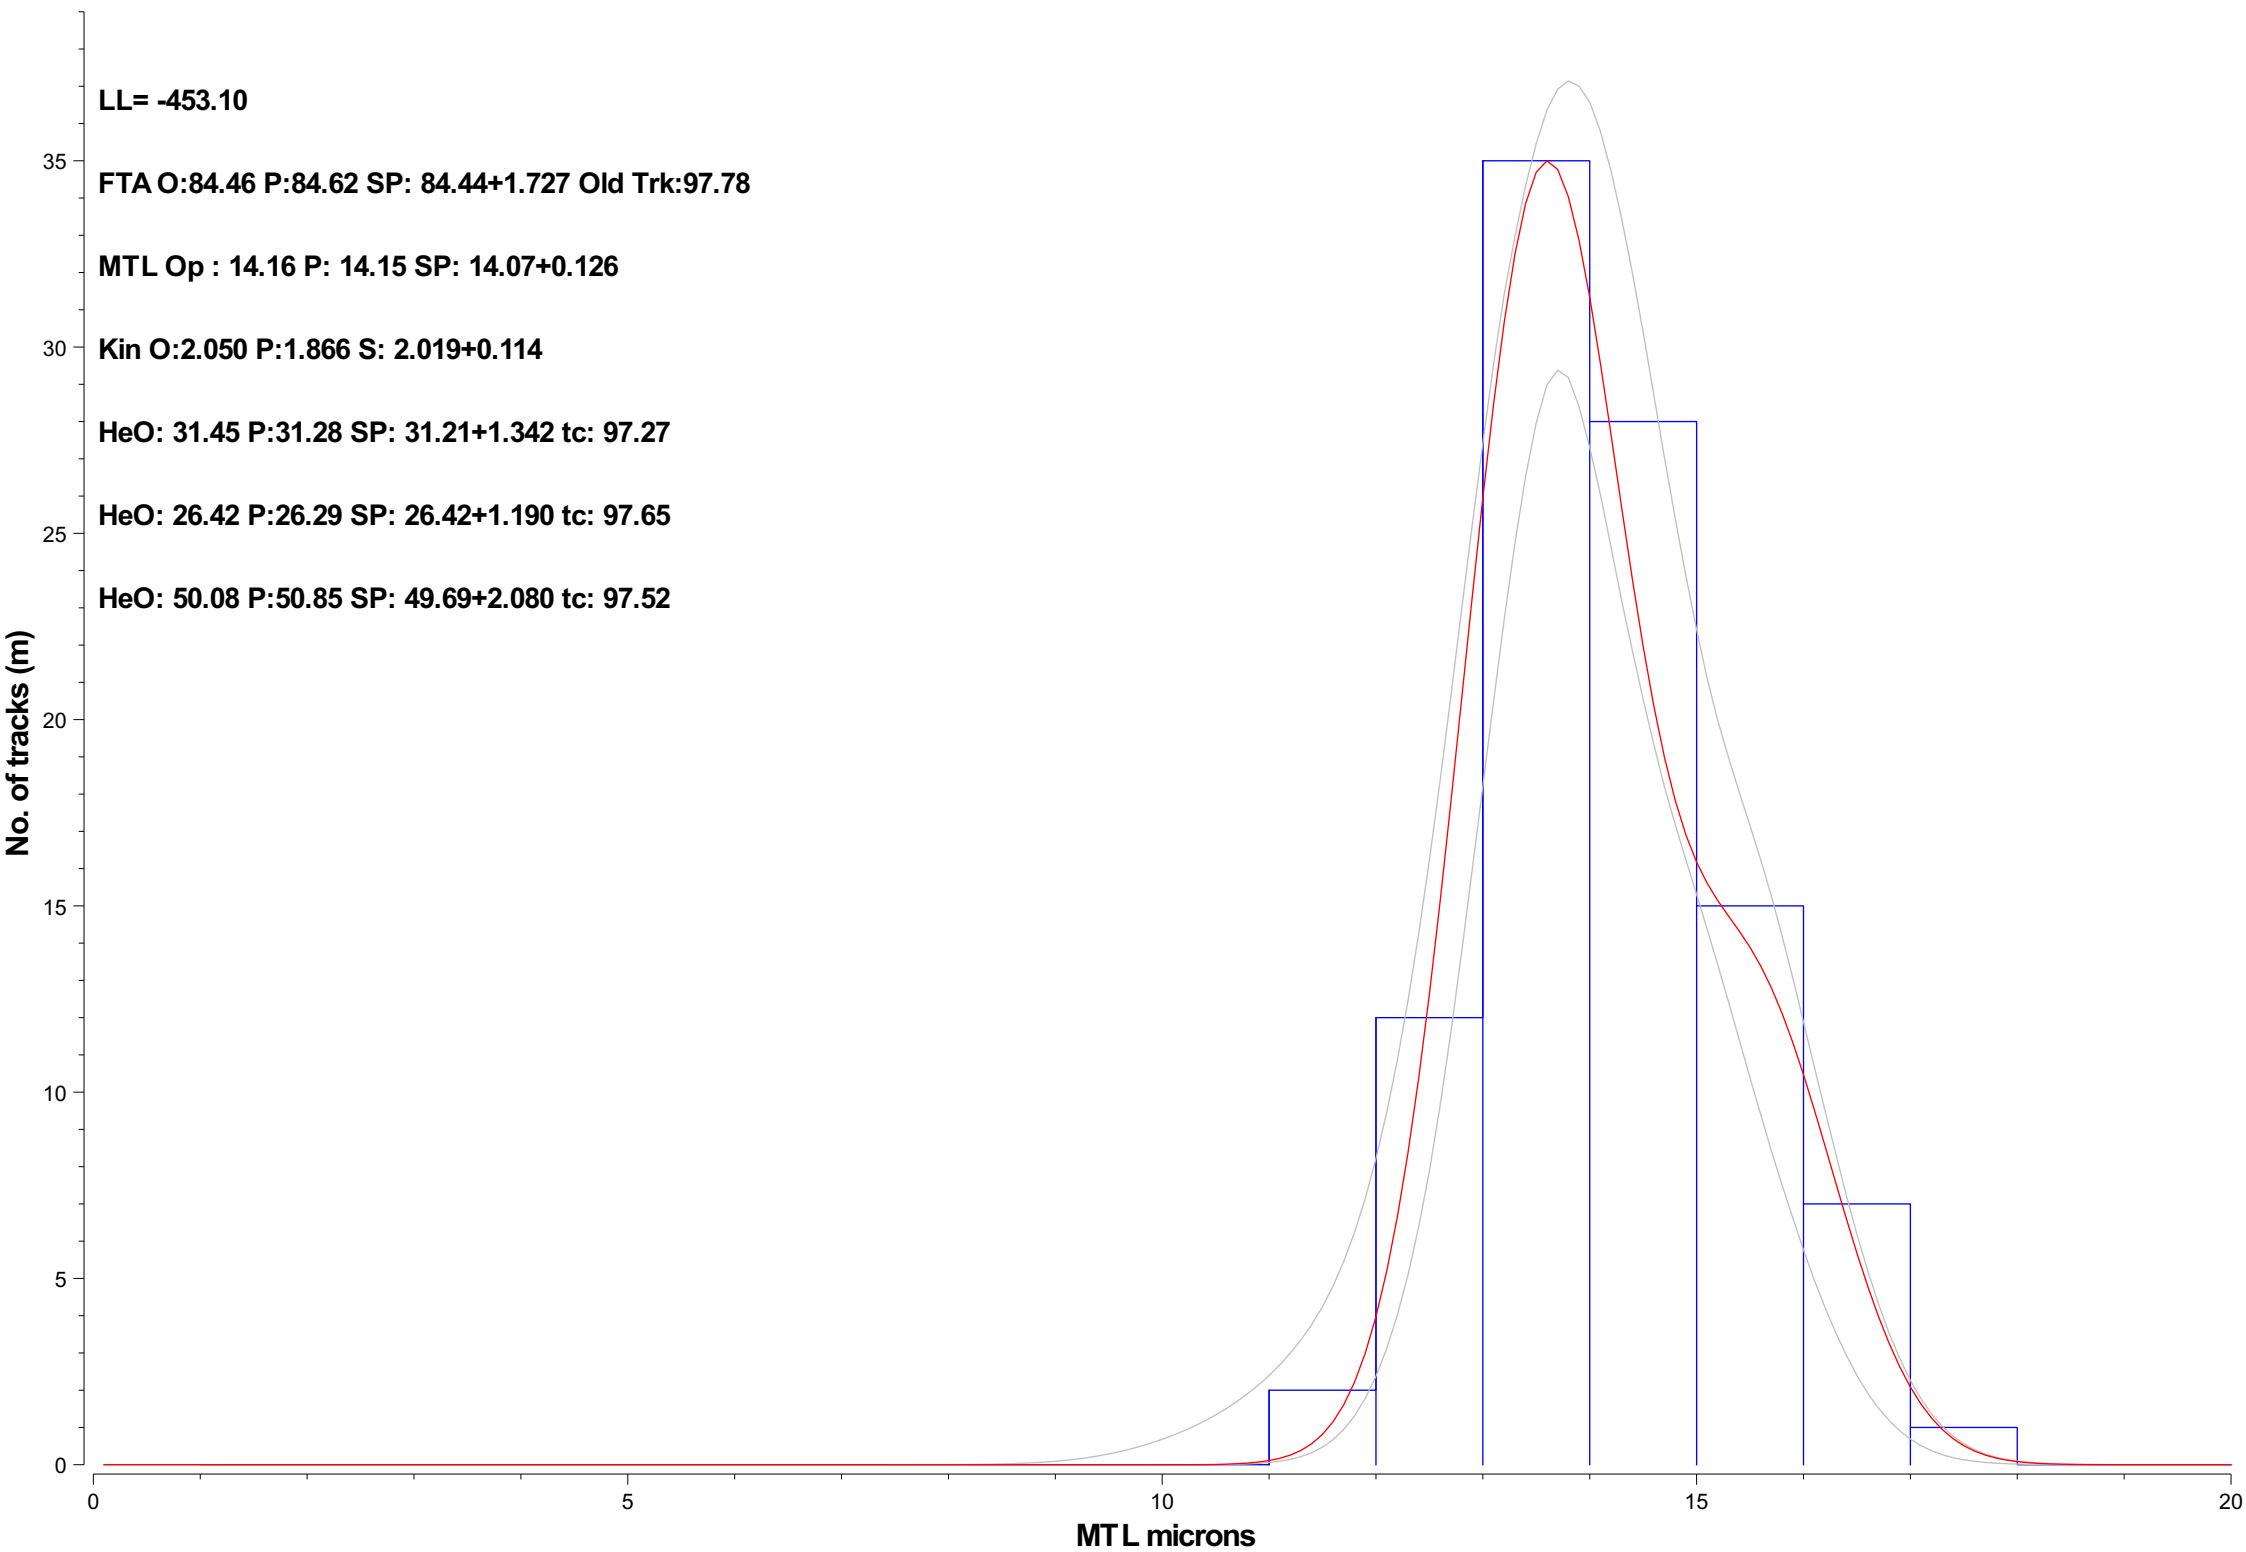

Supplement: Supplementary file 24 [file 1]

# Exercise4\_GROUPD-2\_3 : Max Post

Time (Ma)

Temperature (C)

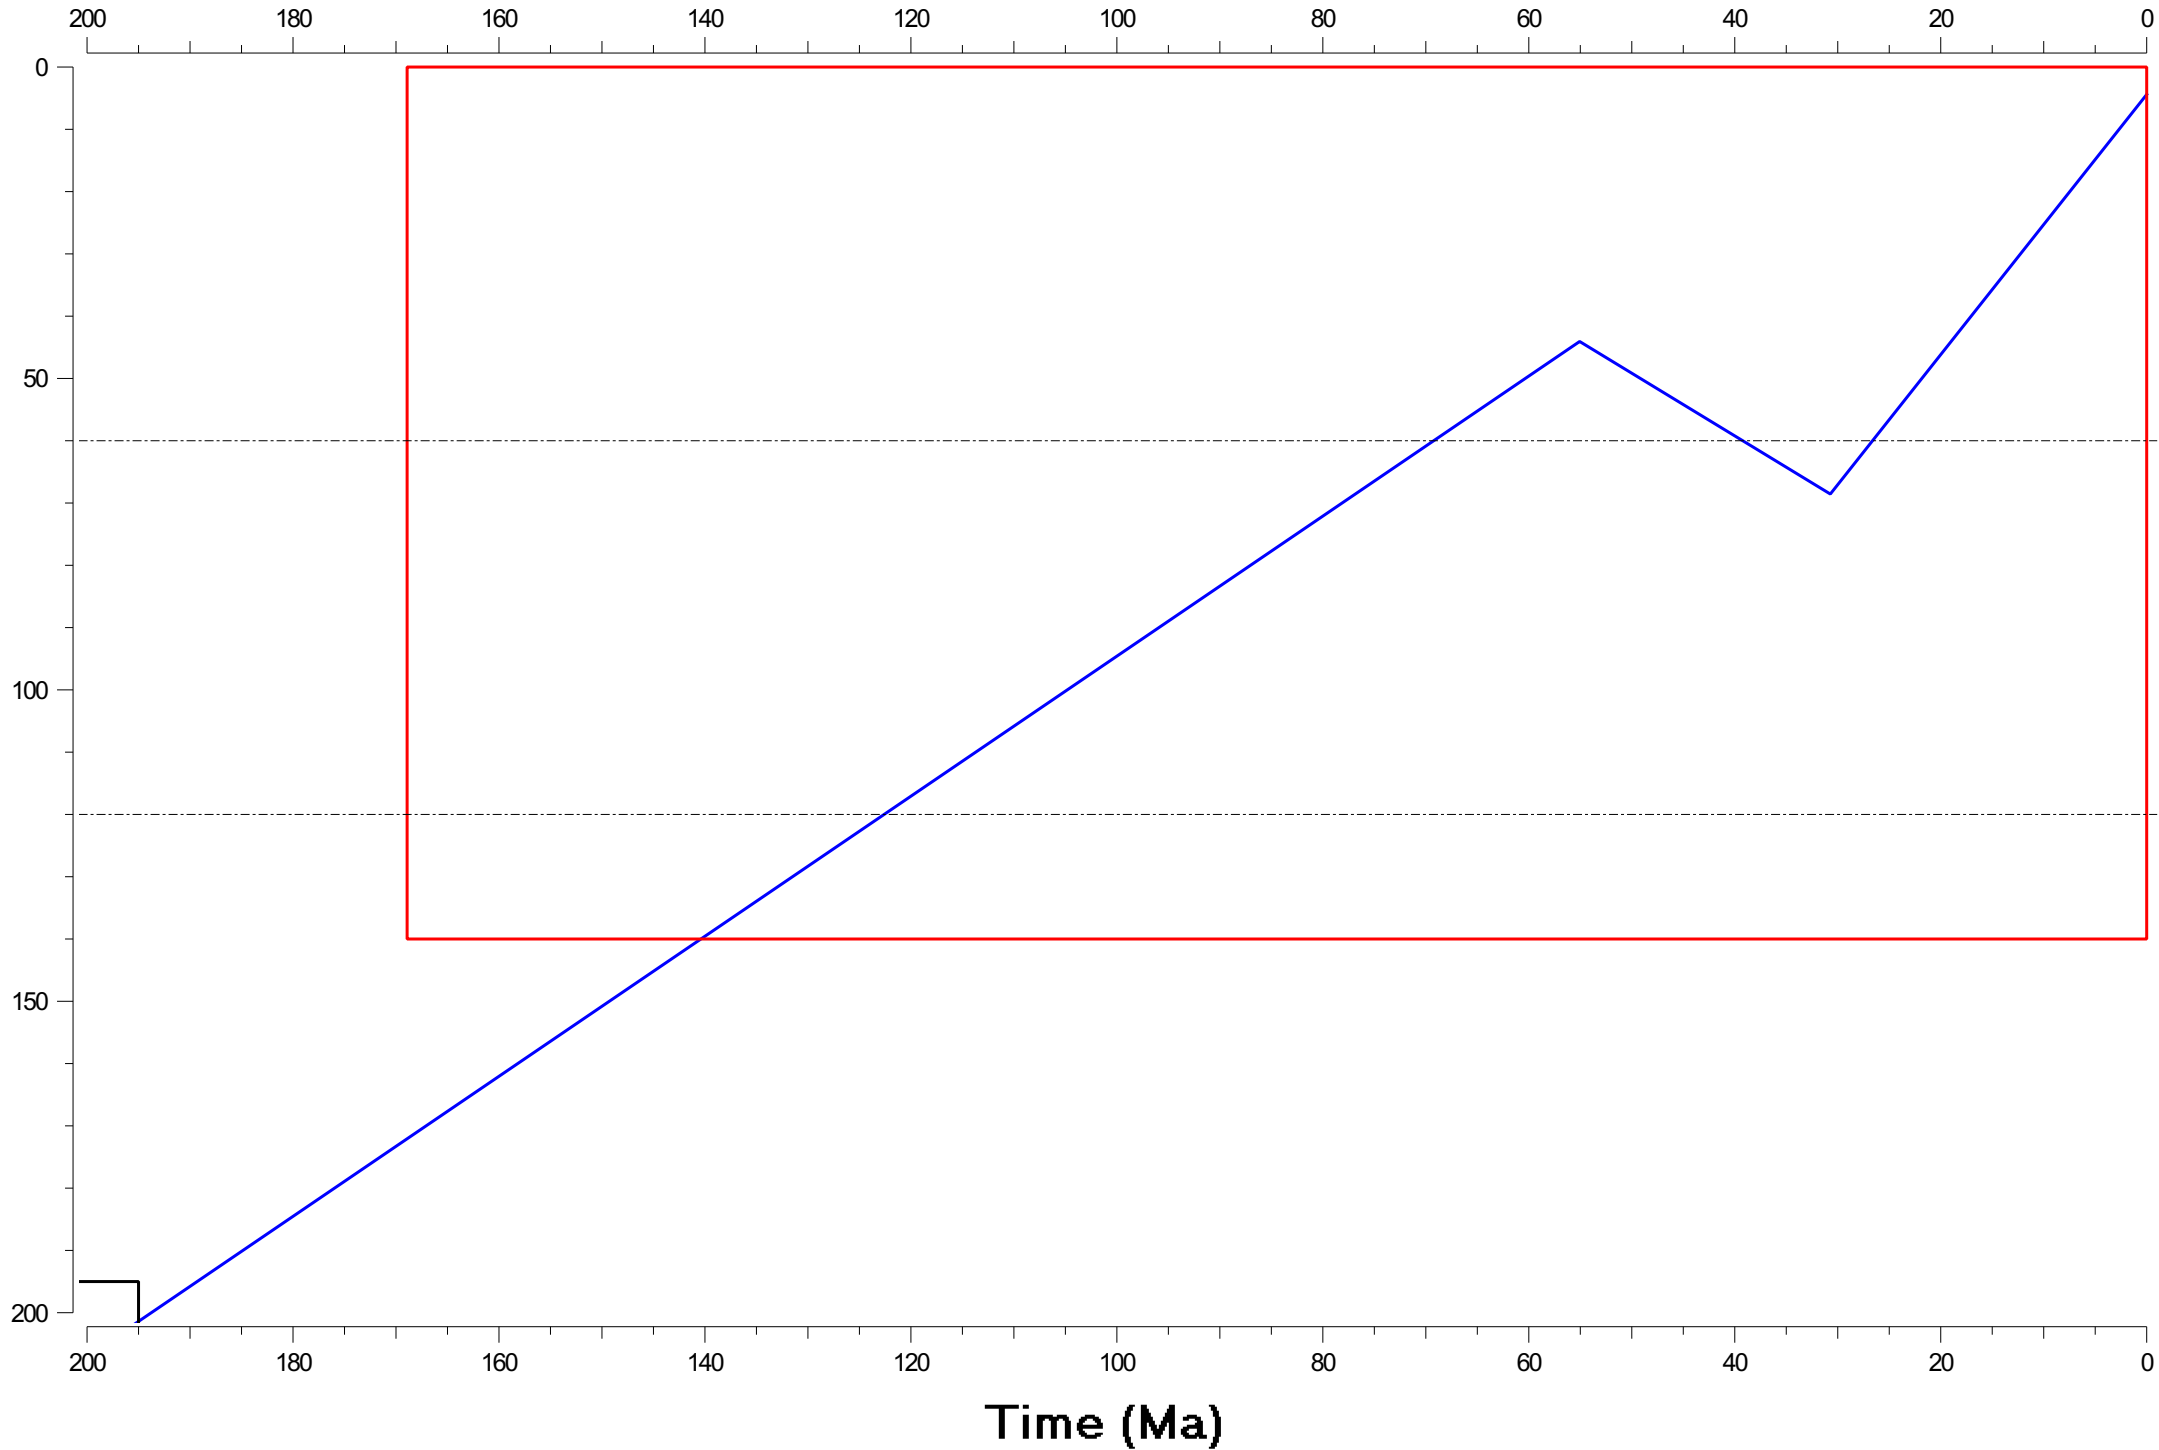

Supplement: Supplementary file 25 [file 1]

# Exercise4\_GROUPC-1\_3\_Exercise4\_InputData\_UThHe\_only\_dataset1.txt : Max. Likelihood

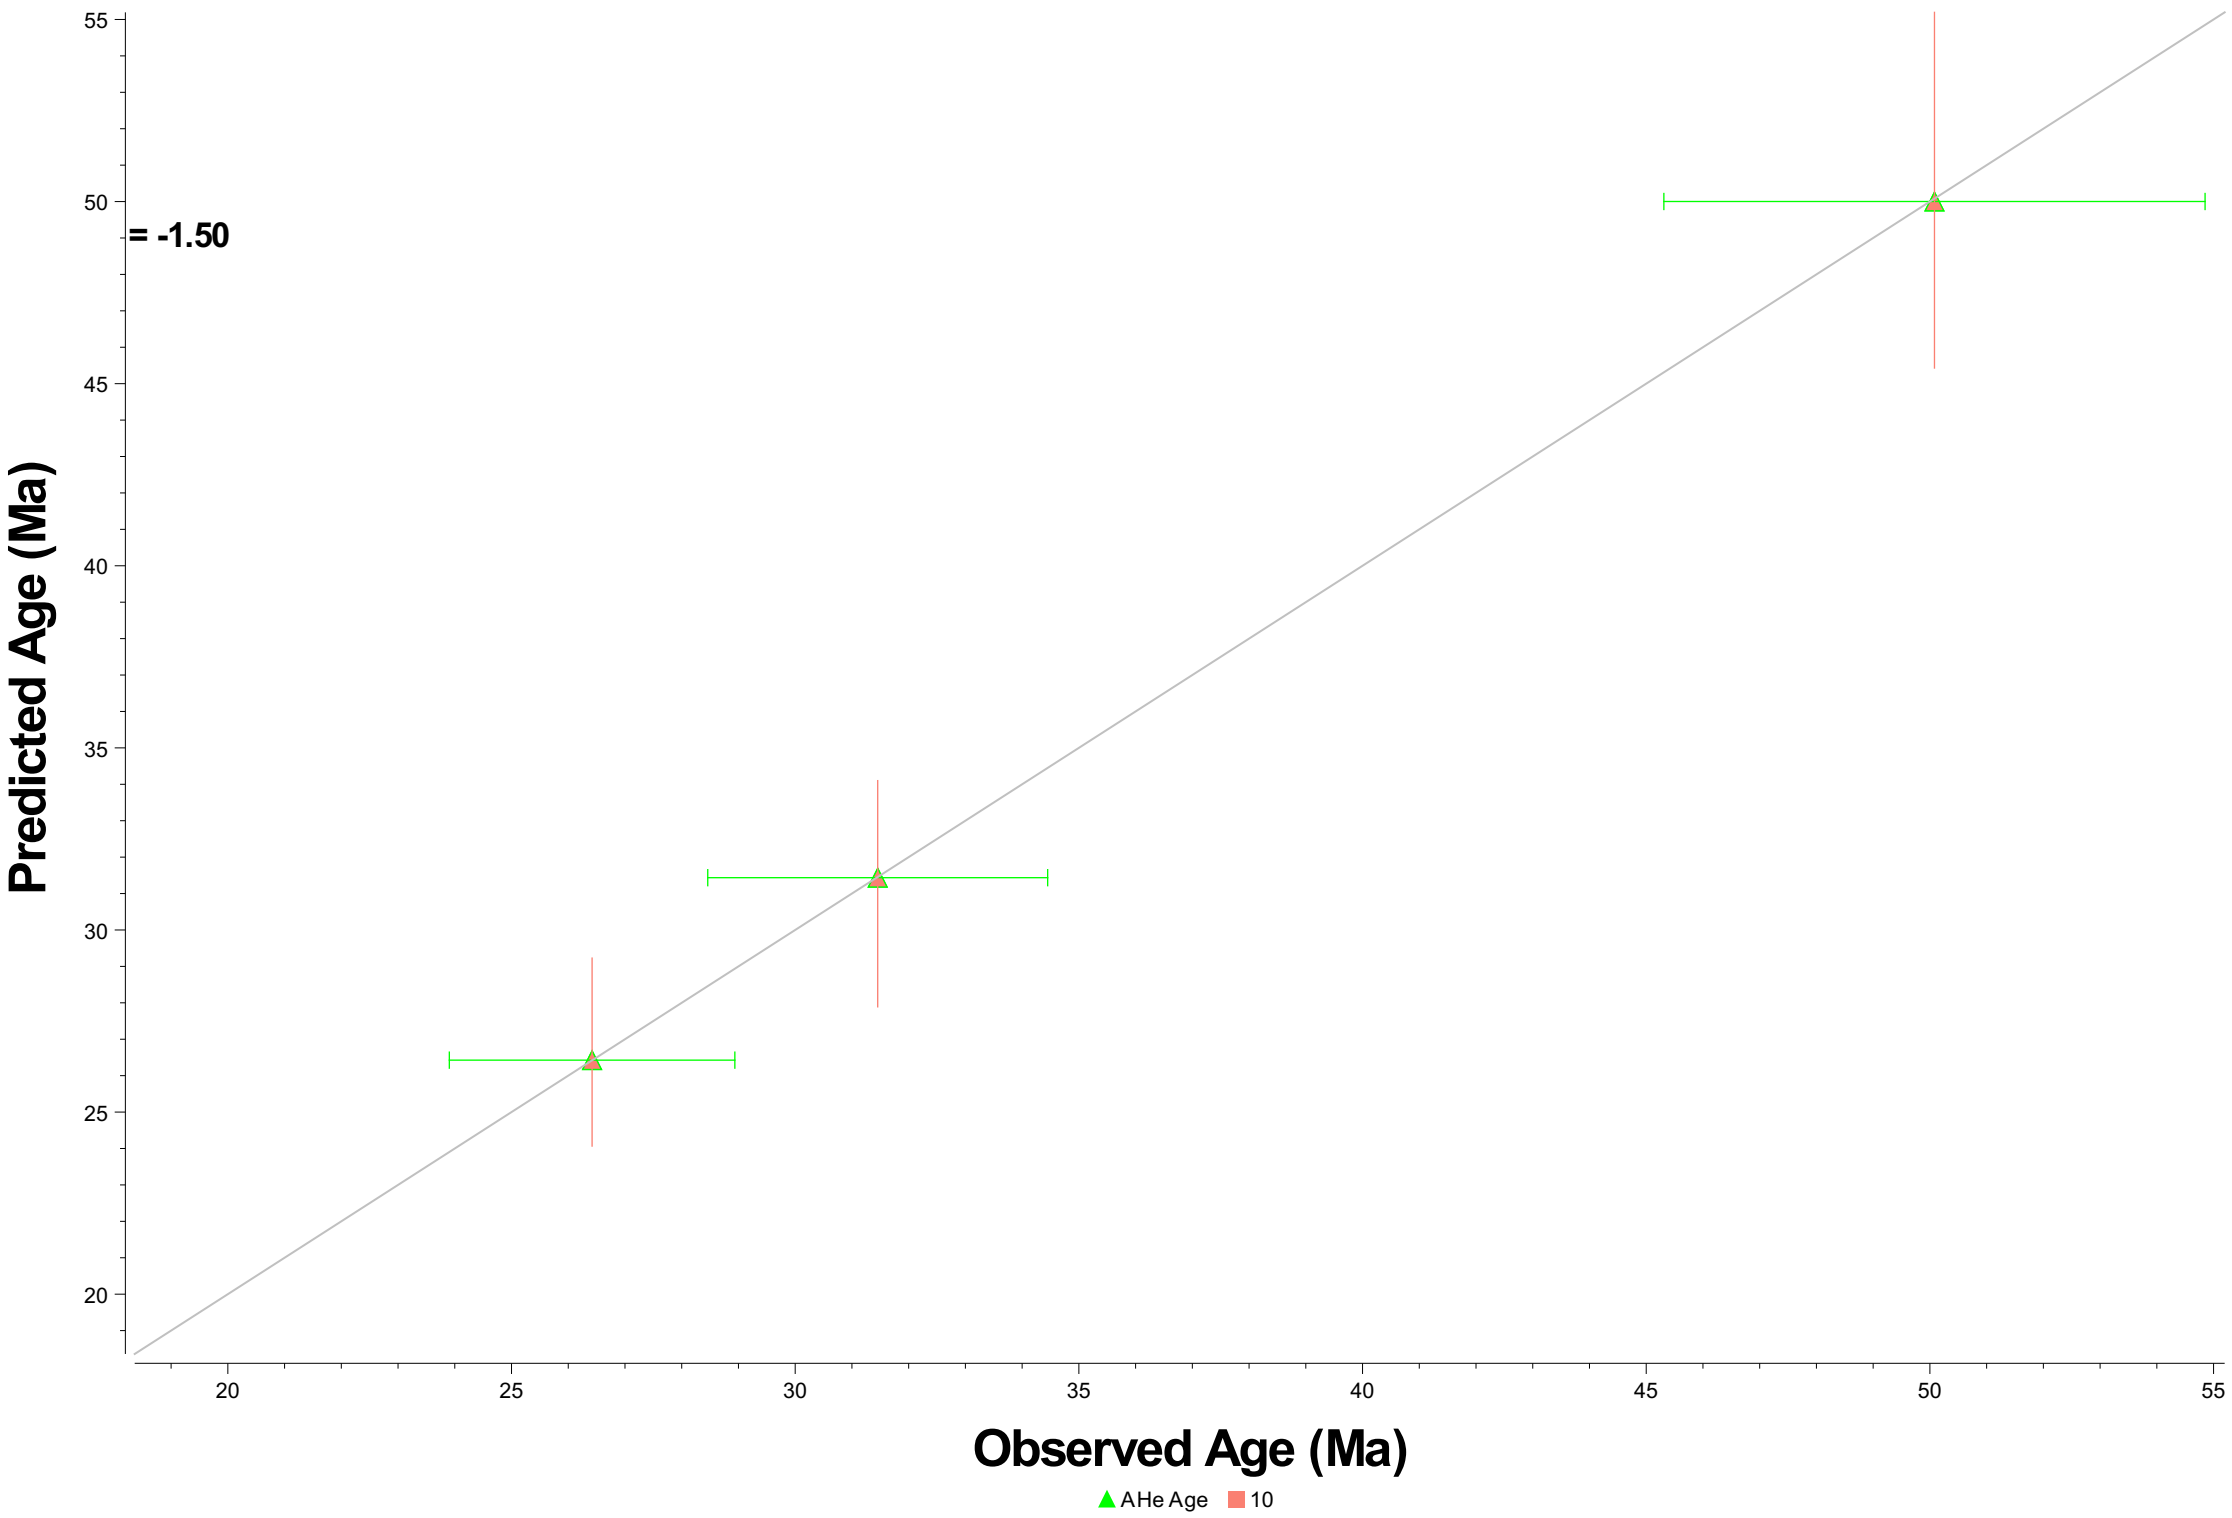

Supplement: Supplementary file 26 [file 1]

# Exercise4\_GROUPB-1\_3 : Max Post

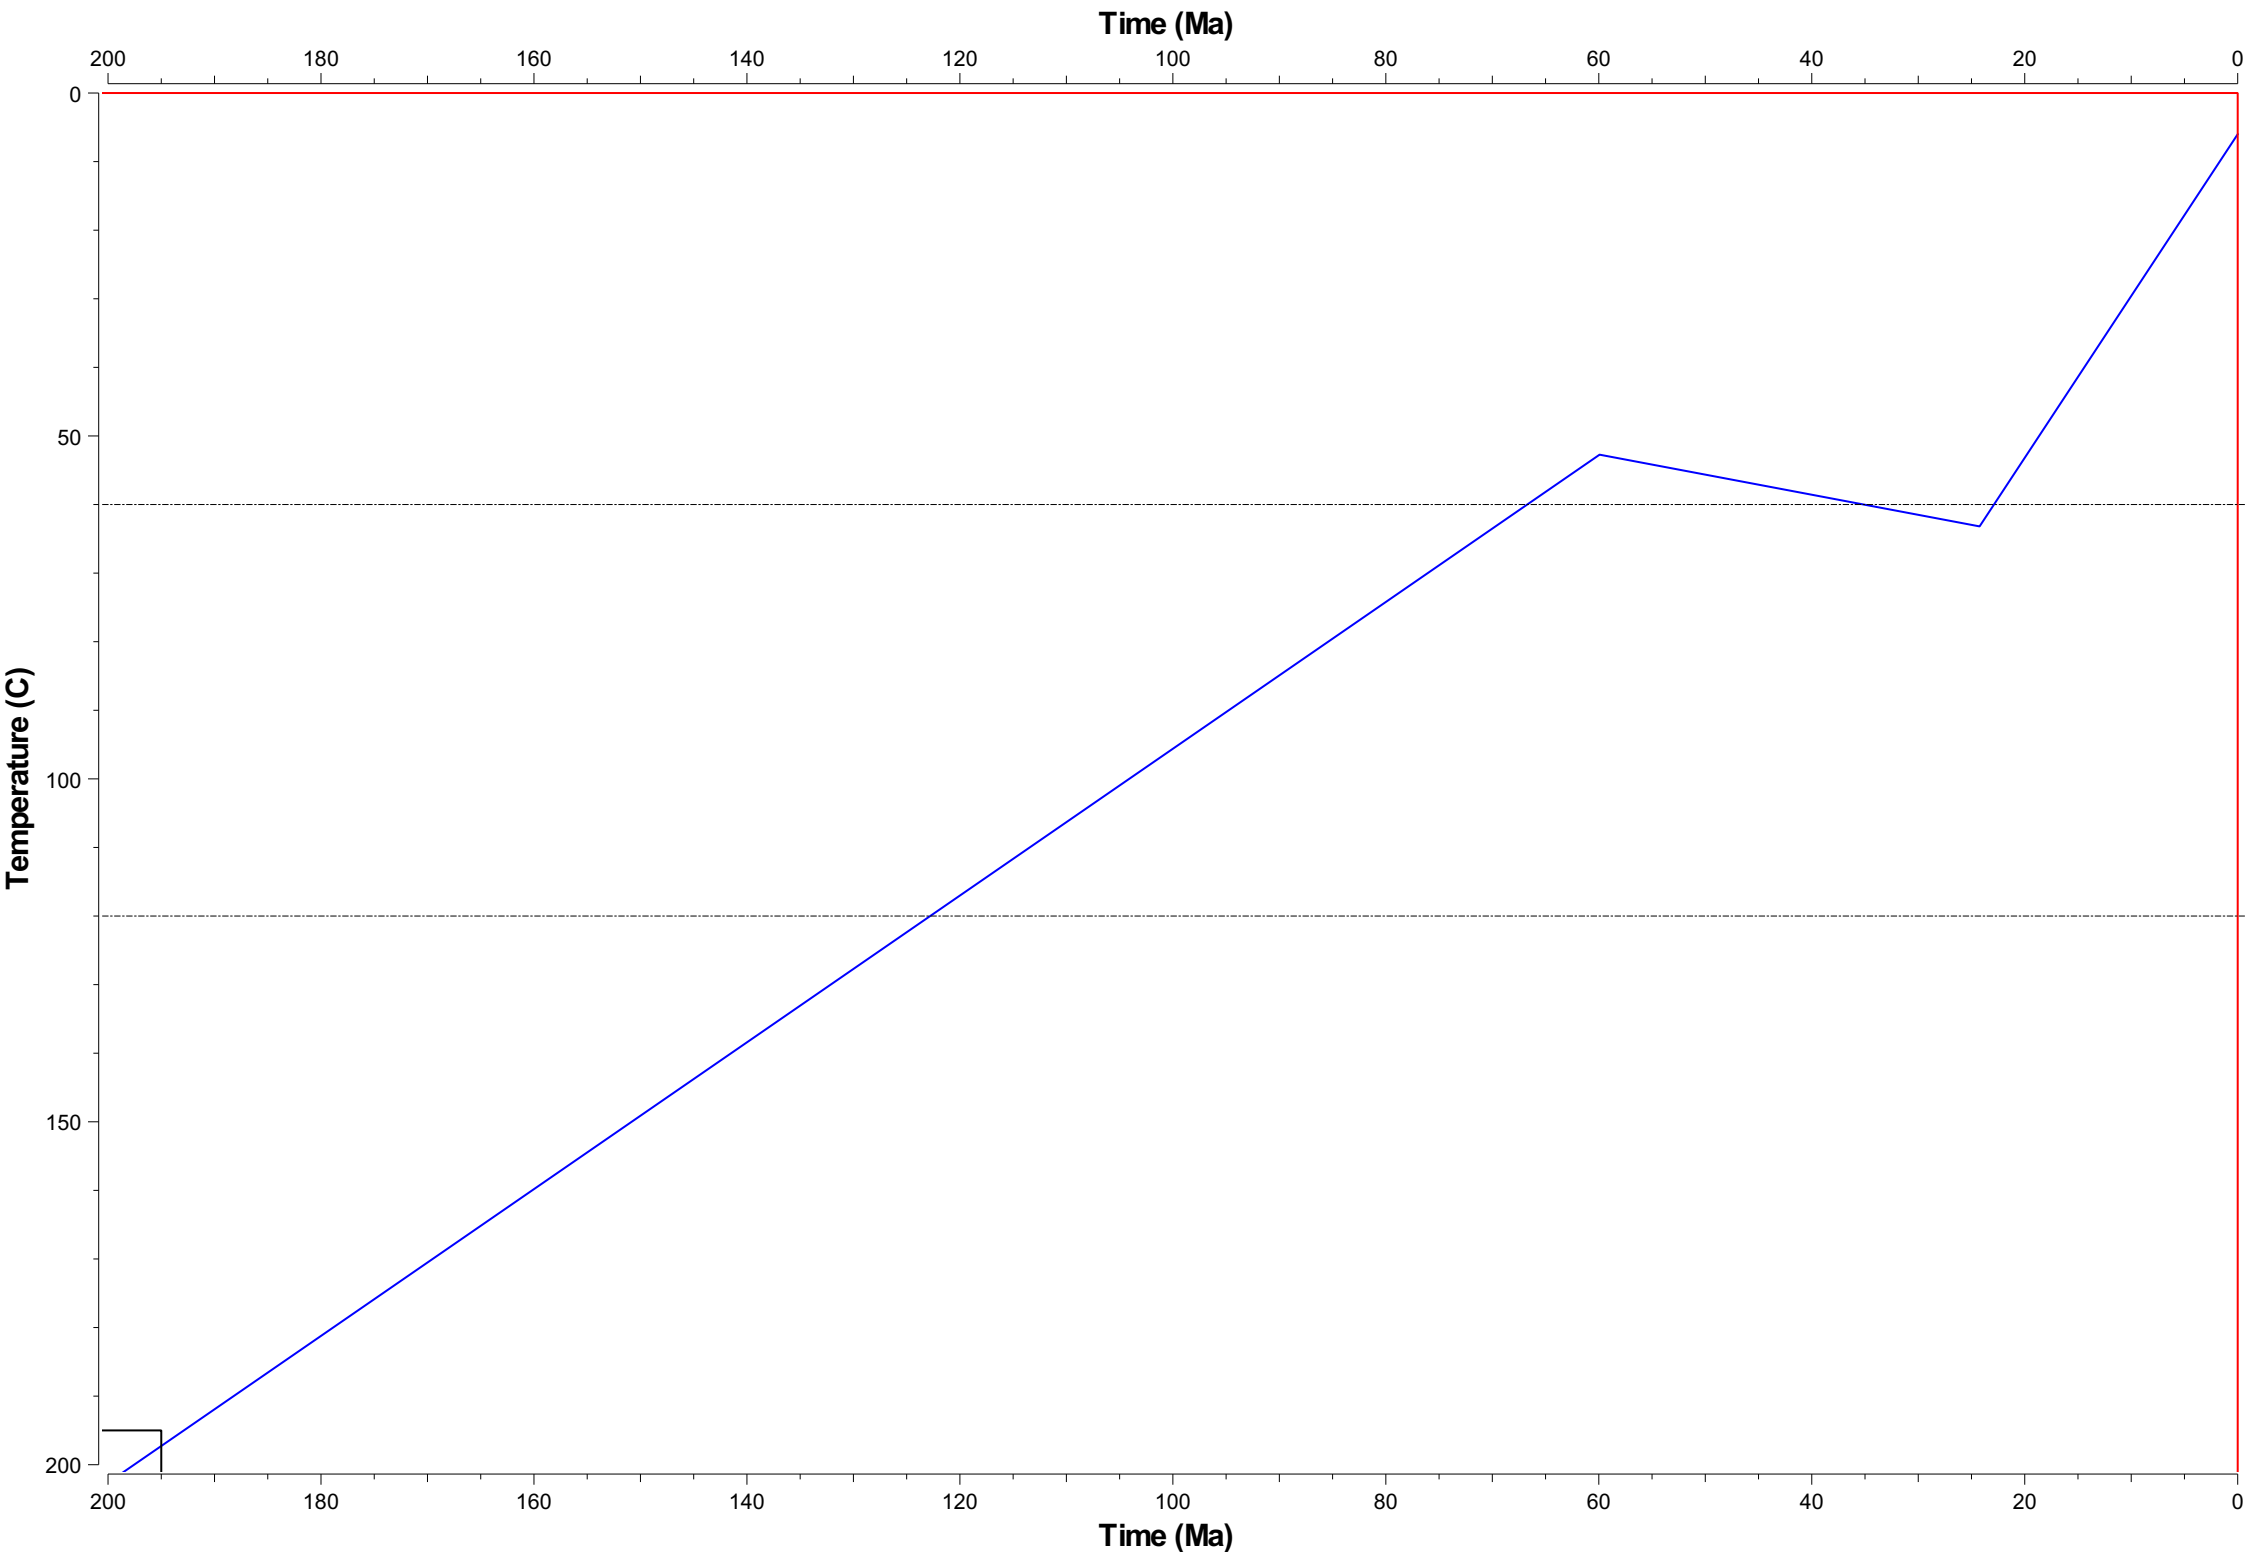

Supplement: Supplementary file 27 [file 1]

# Exercise3\_IM\_4 : EXPECTED

Time (Ma)

Temperature (C)

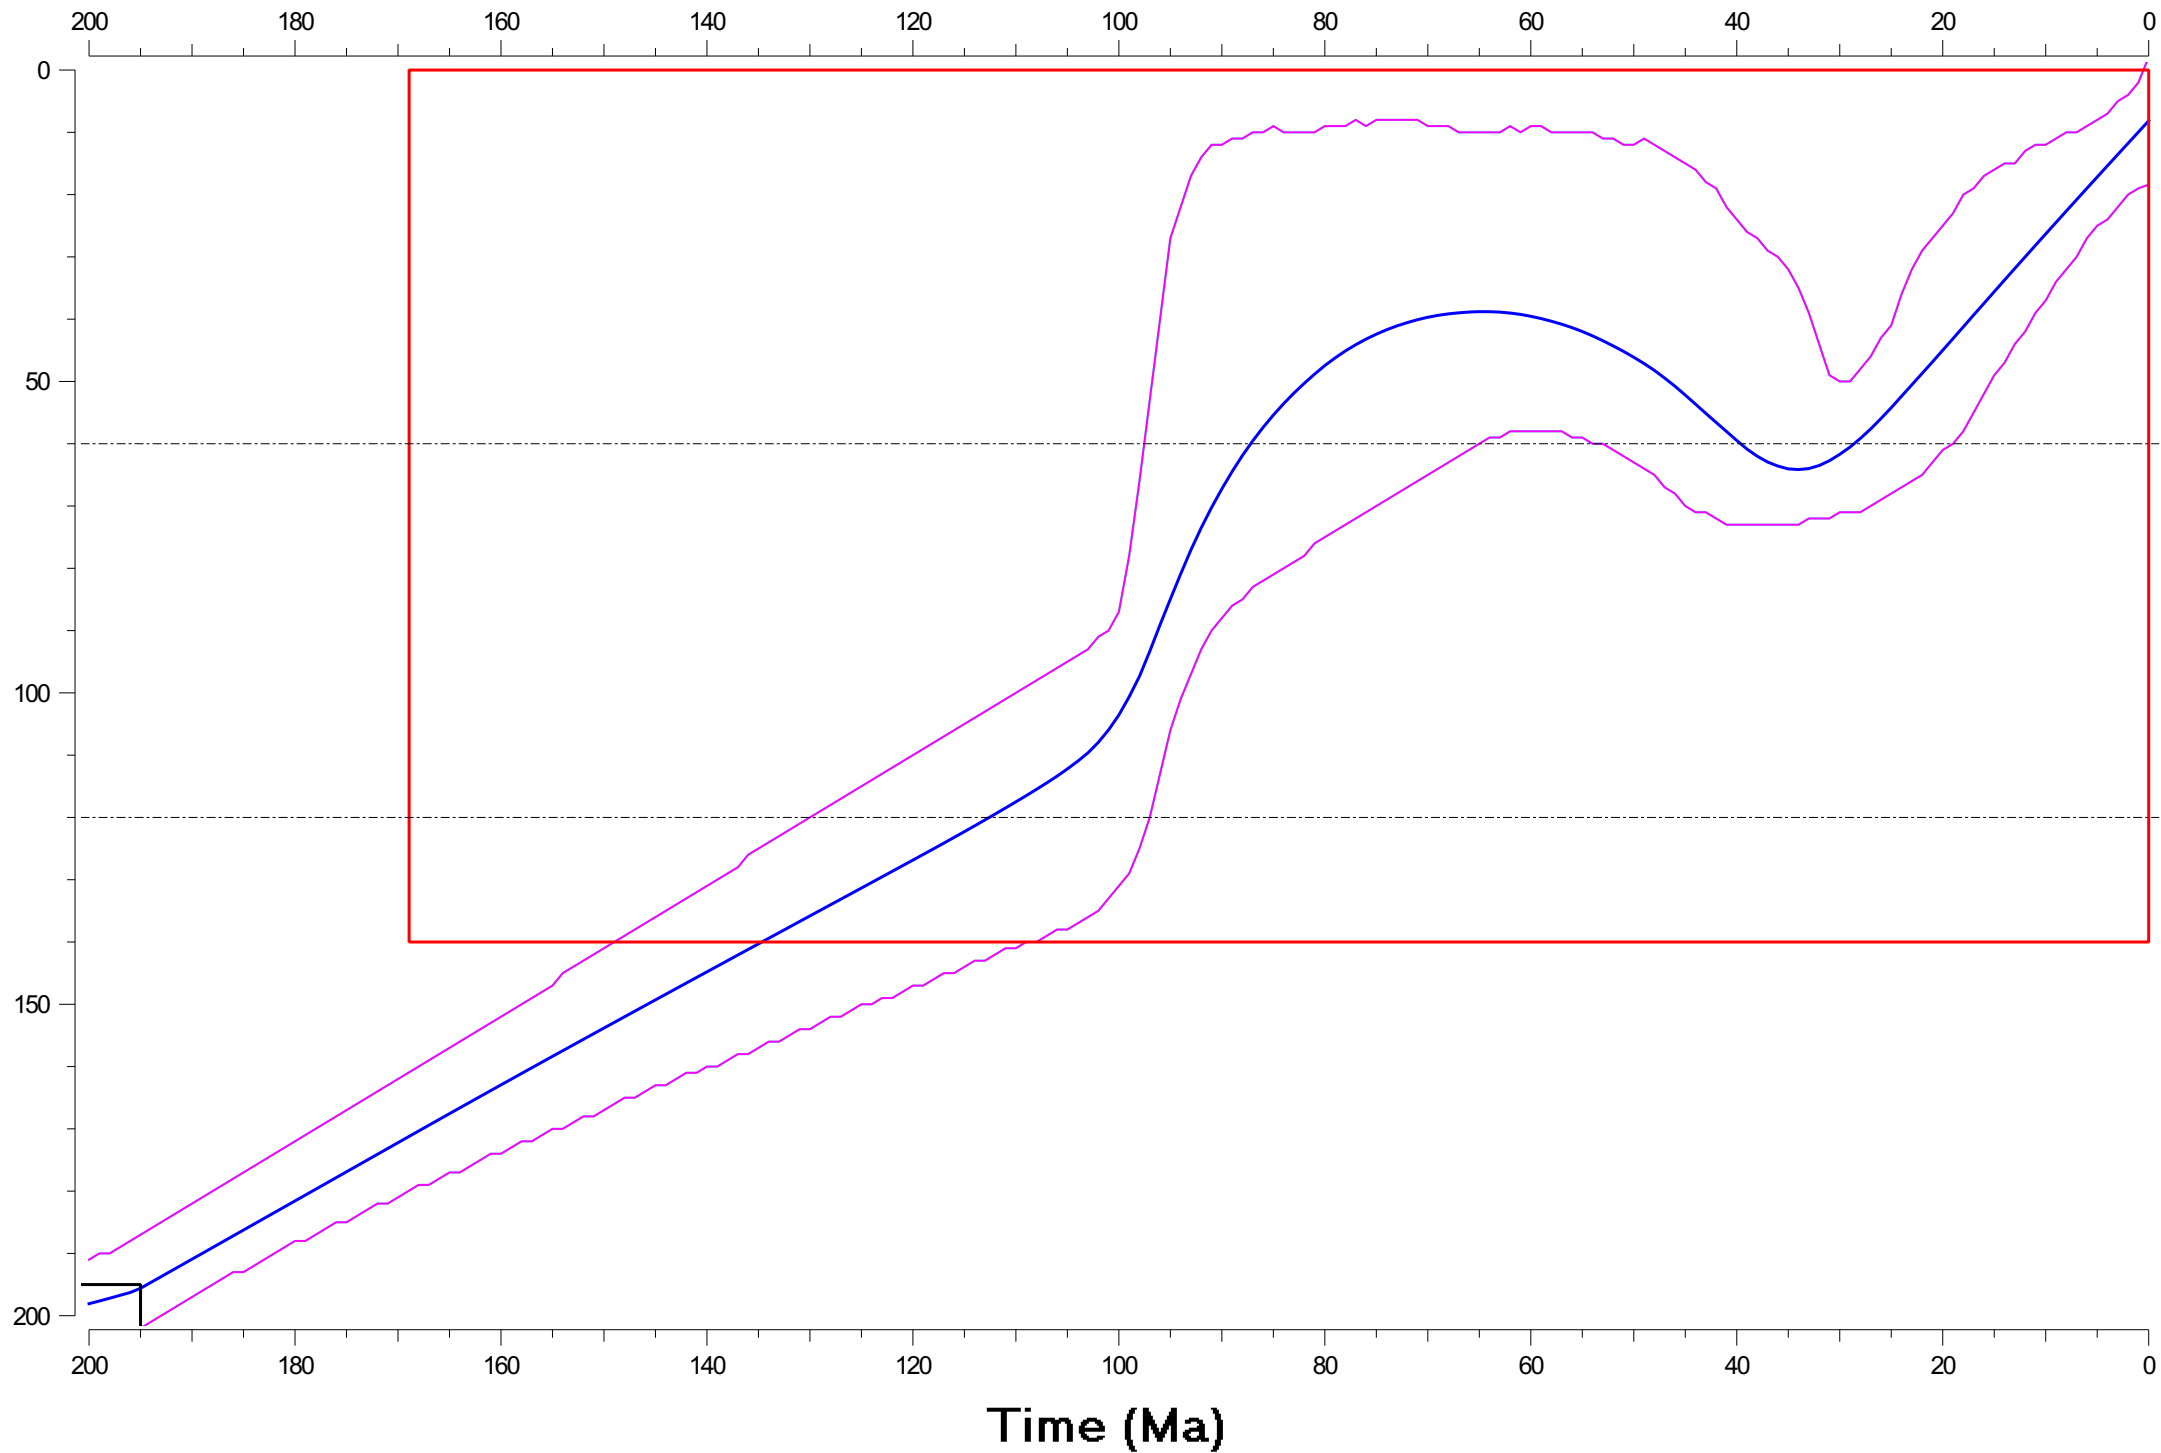

Supplement: Supplementary file 28 [file 1]

# Exercise4\_GROUPA-2\_3

Log Likelihood

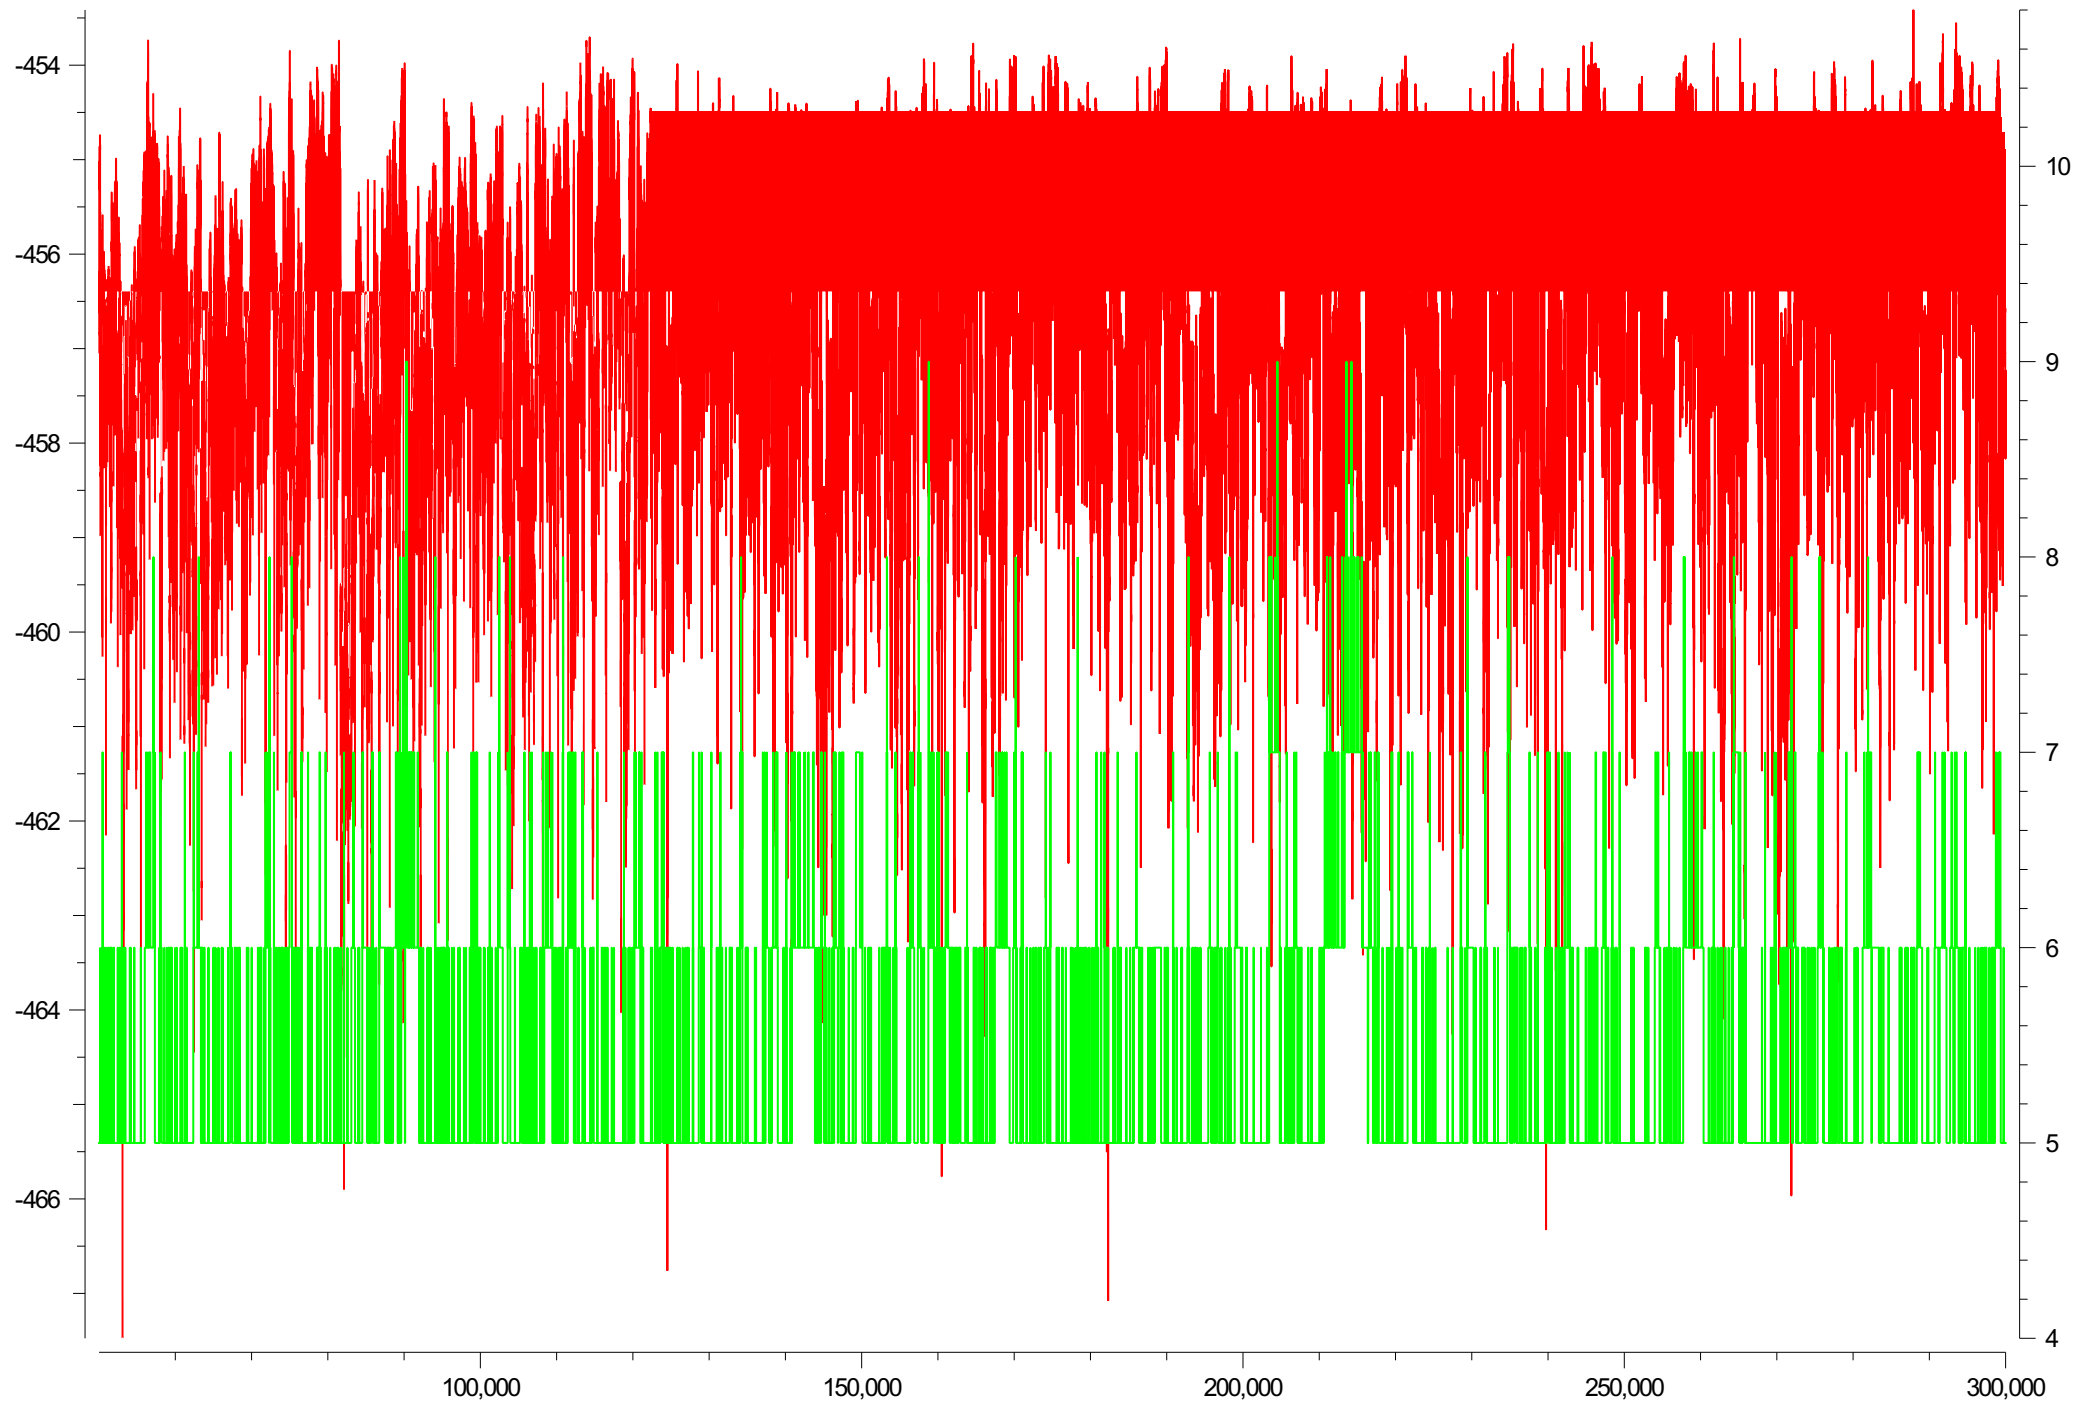

No. of T(t) points

Iteration

— Likelihood — No. of T(t) points

Supplement: Supplementary file 29 [file 1]

# Exercise4\_GROUPB-2\_3

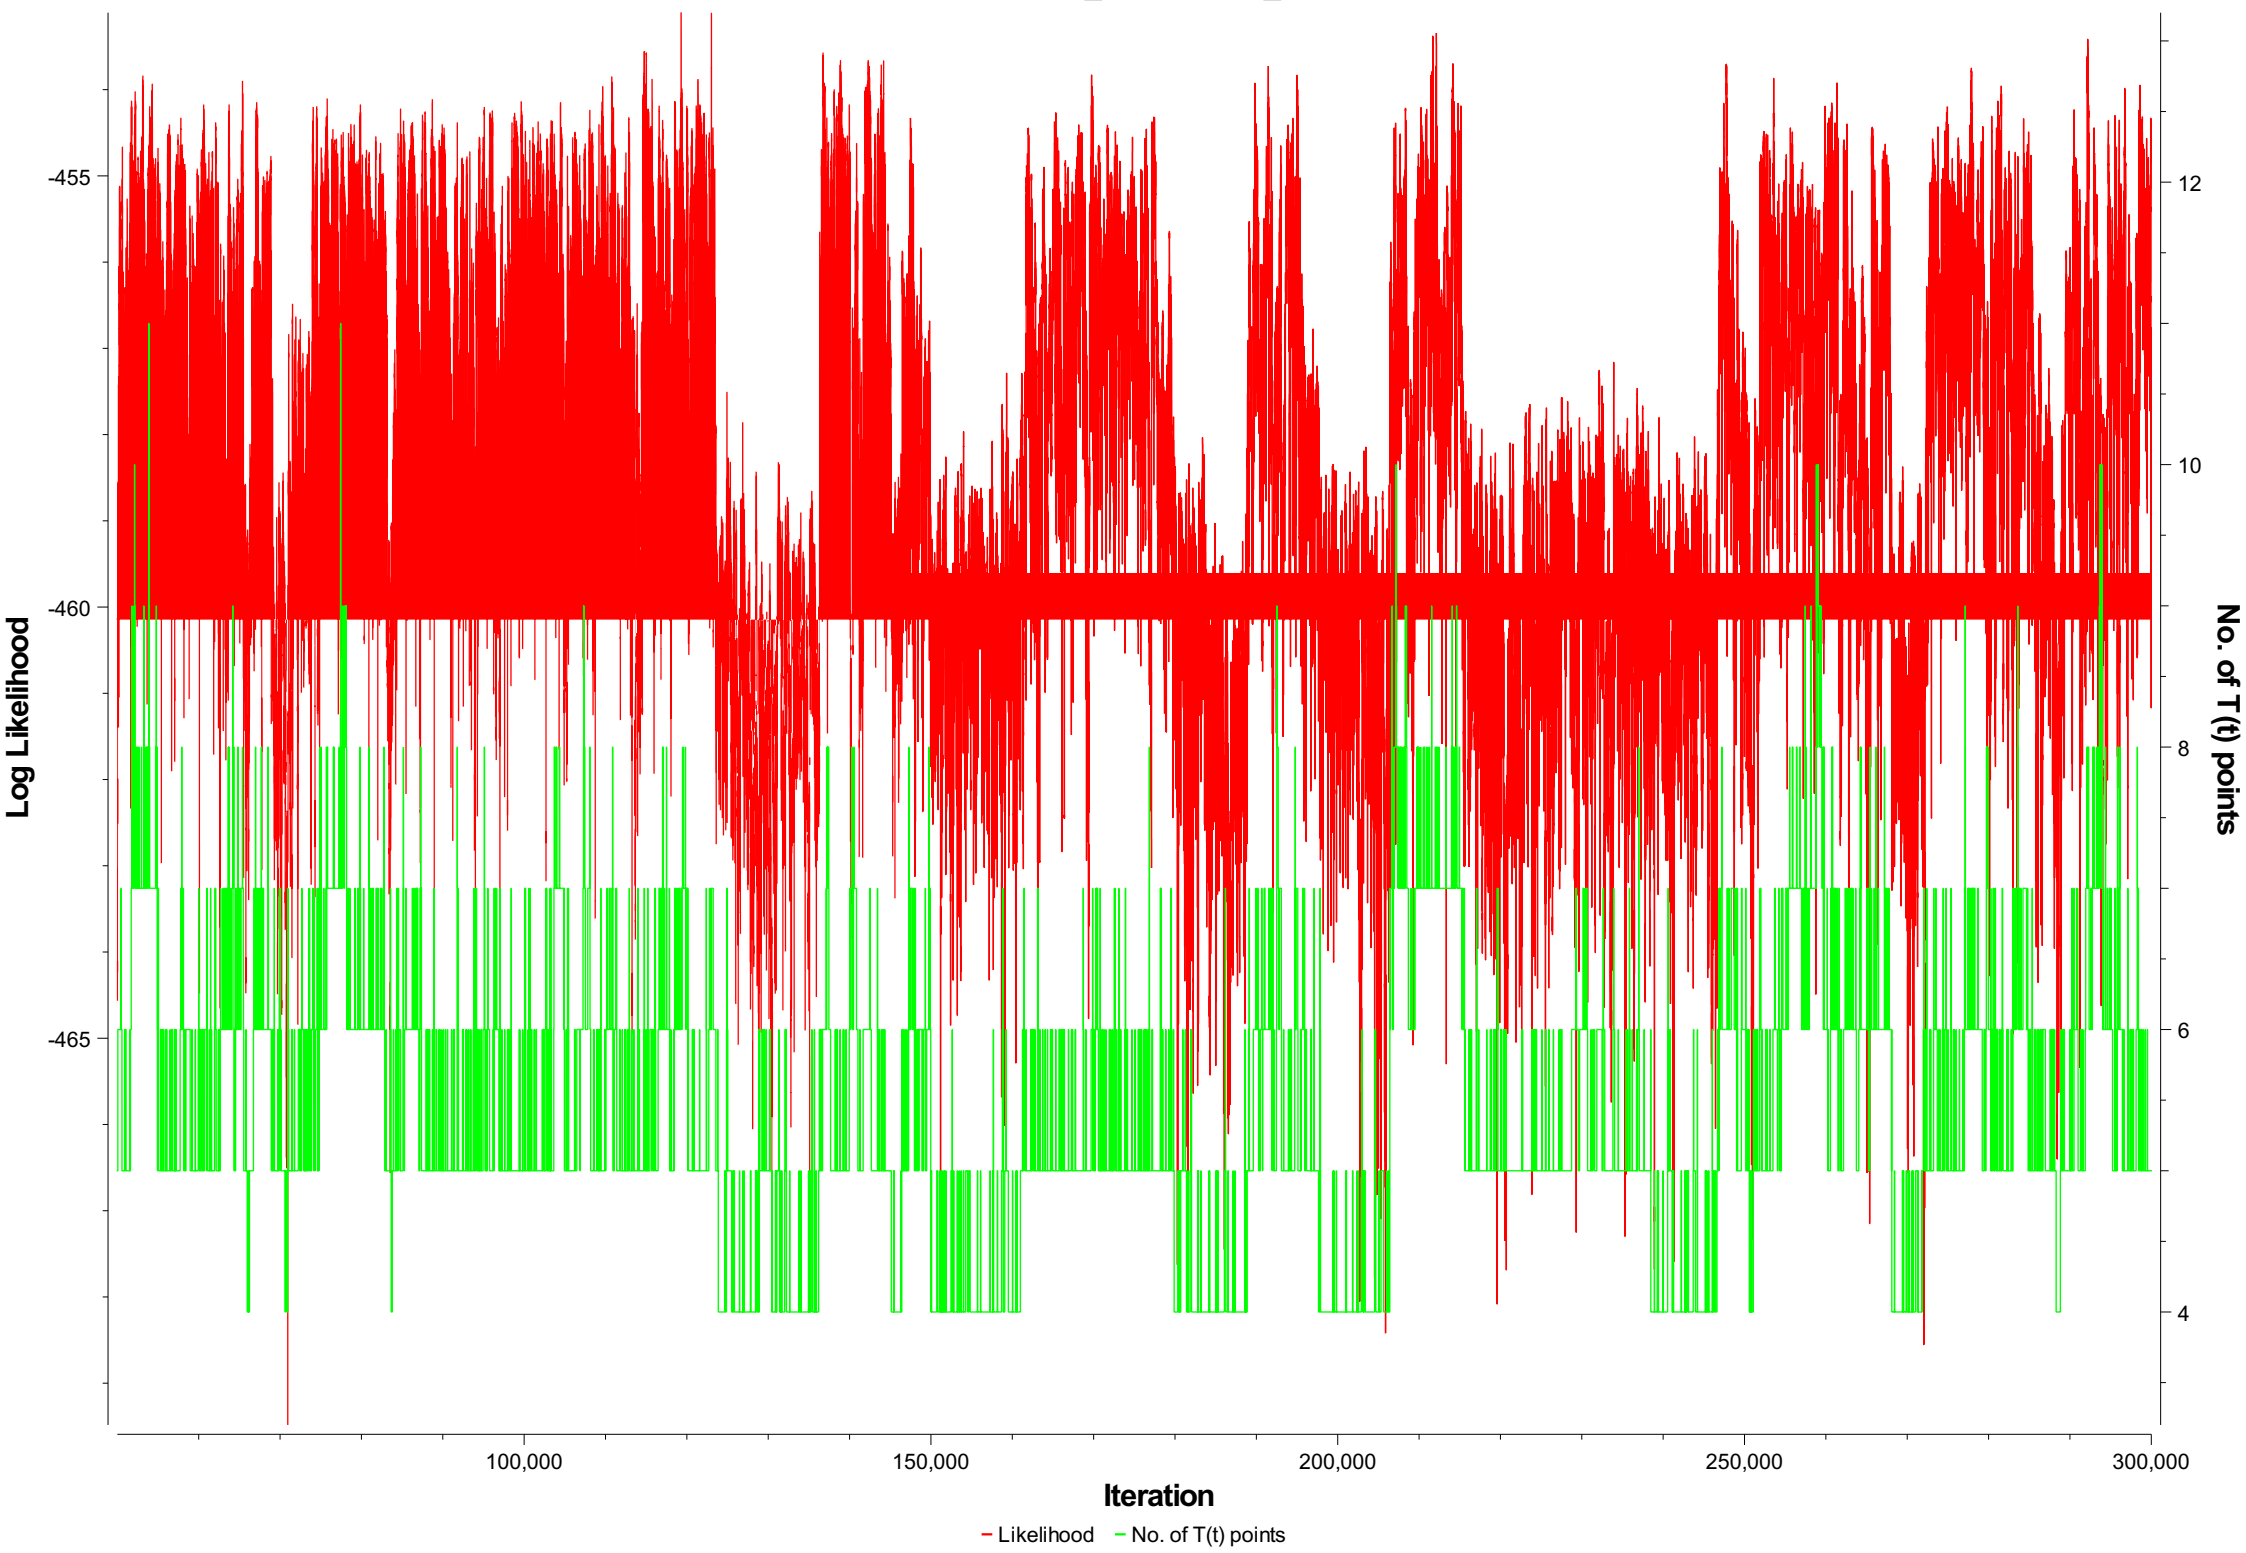

Supplement: Supplementary file 30 [file 1]

# Exercise4\_GROUPD-1\_3\_Exercise4\_InputData.txt : Expected

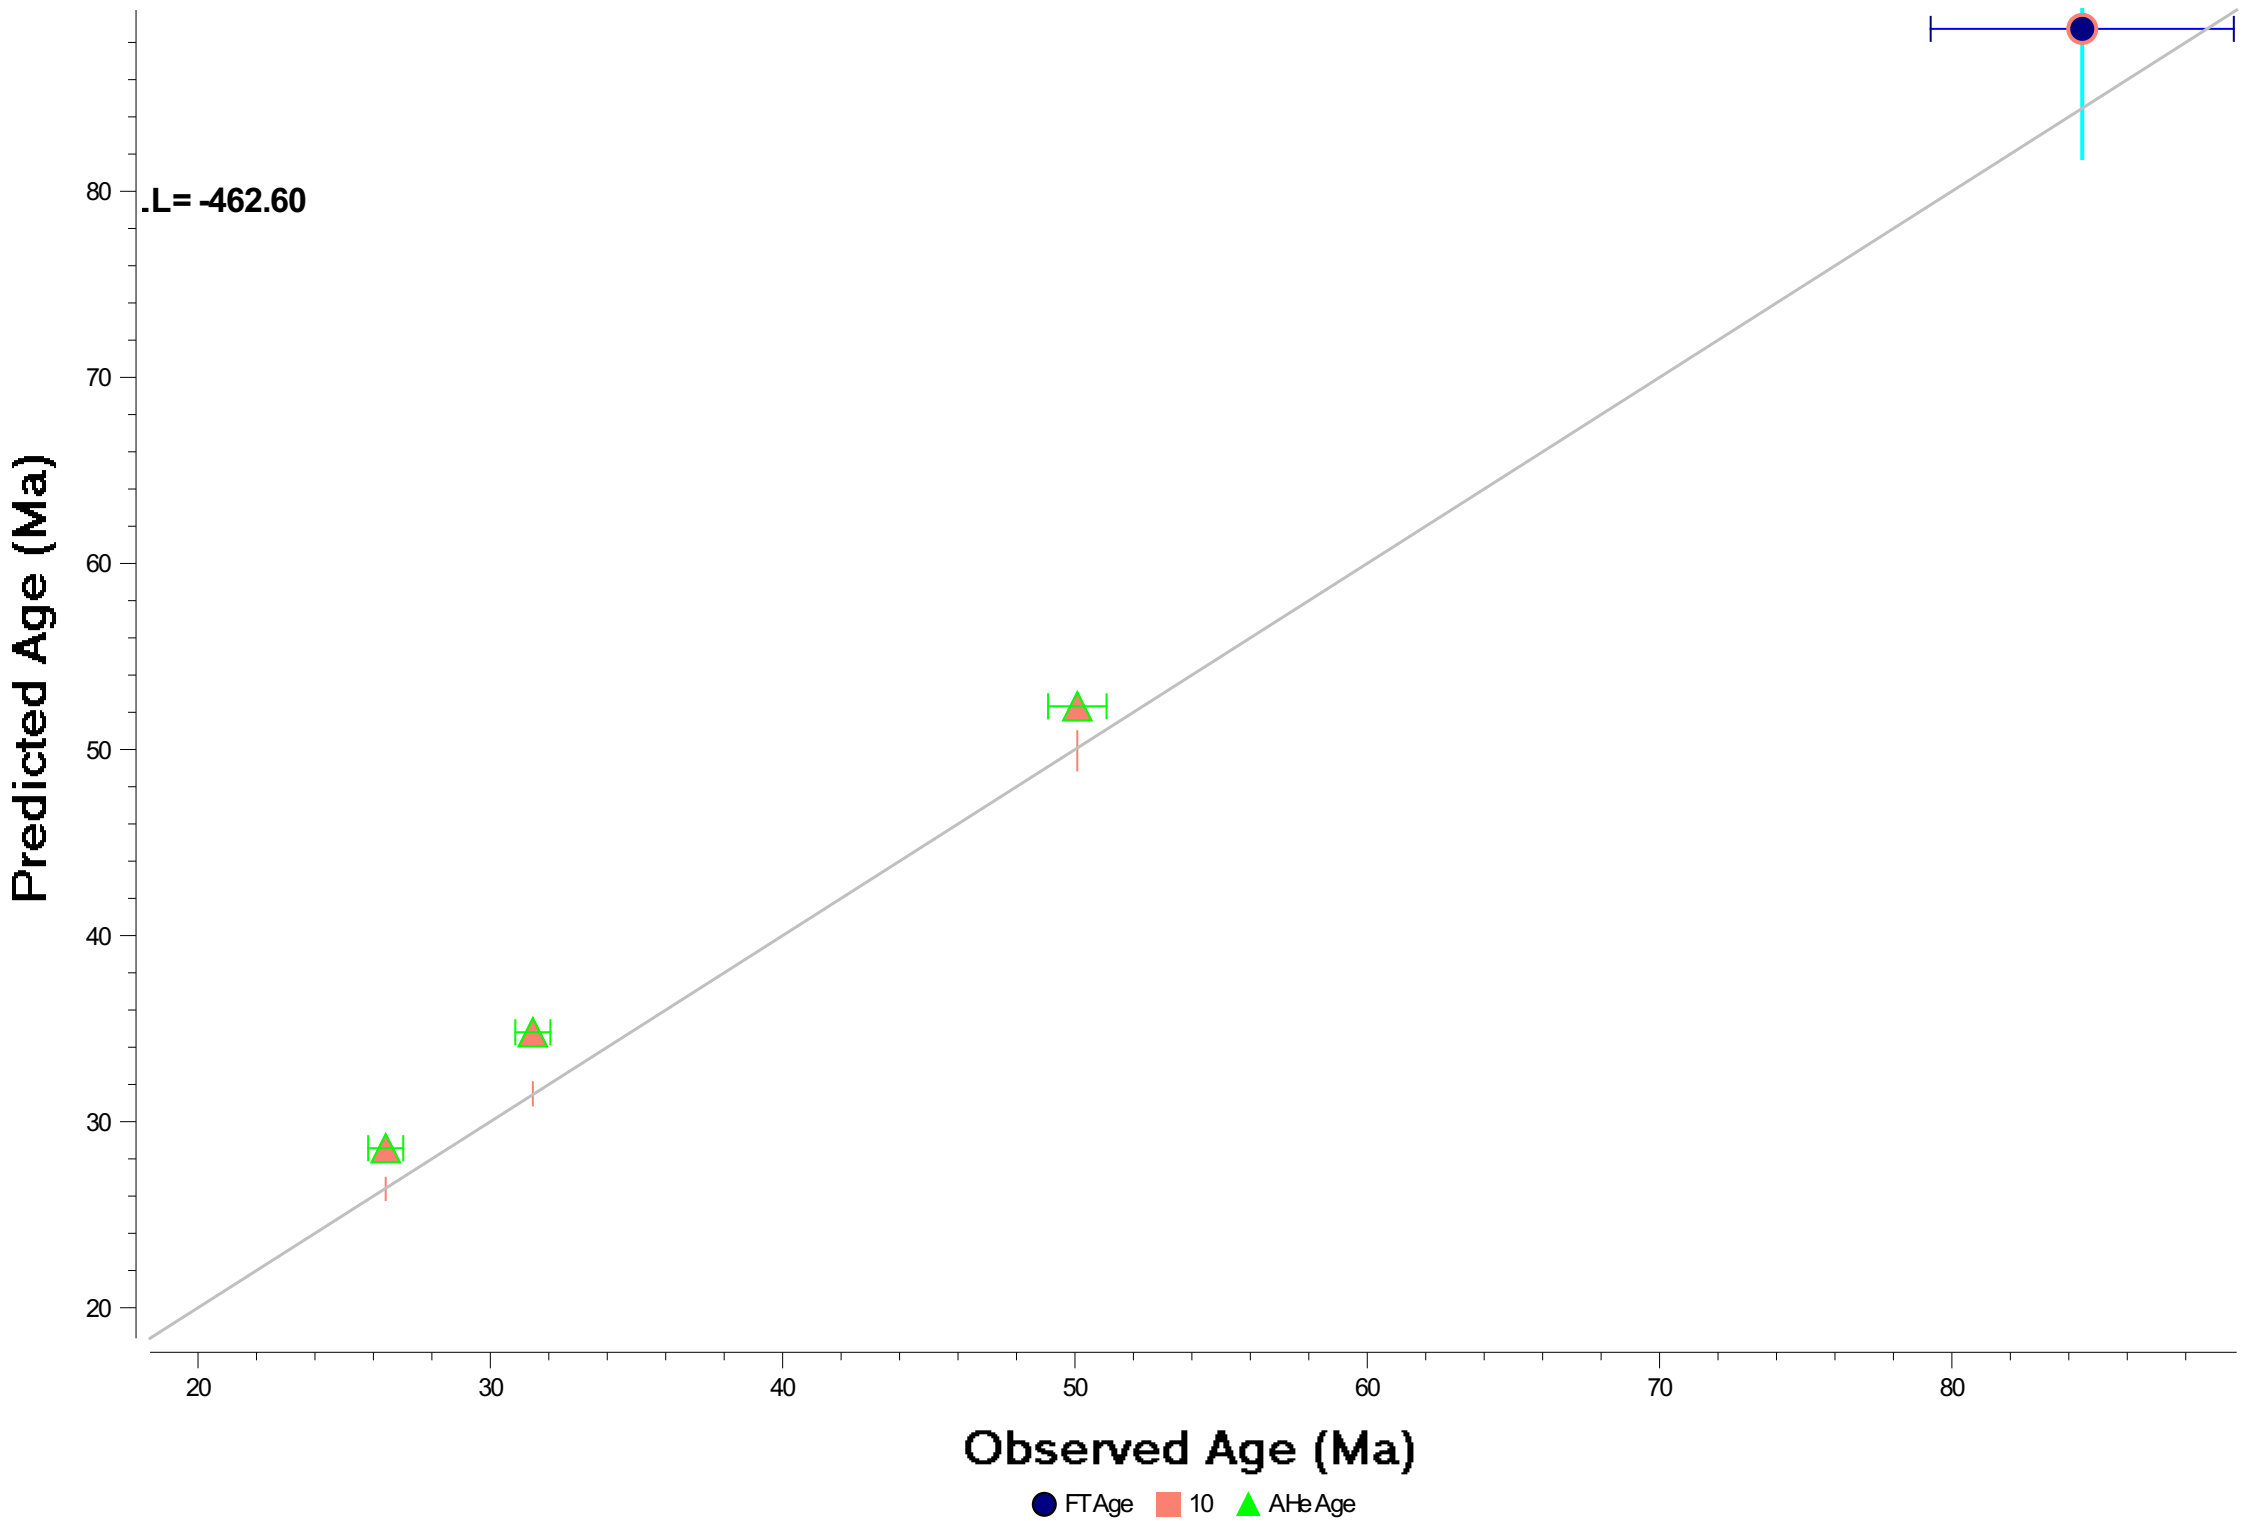

Supplement: Supplementary file 31 [file 1]

# Exercise4\_GROUPD-2\_3

Log Likelihood

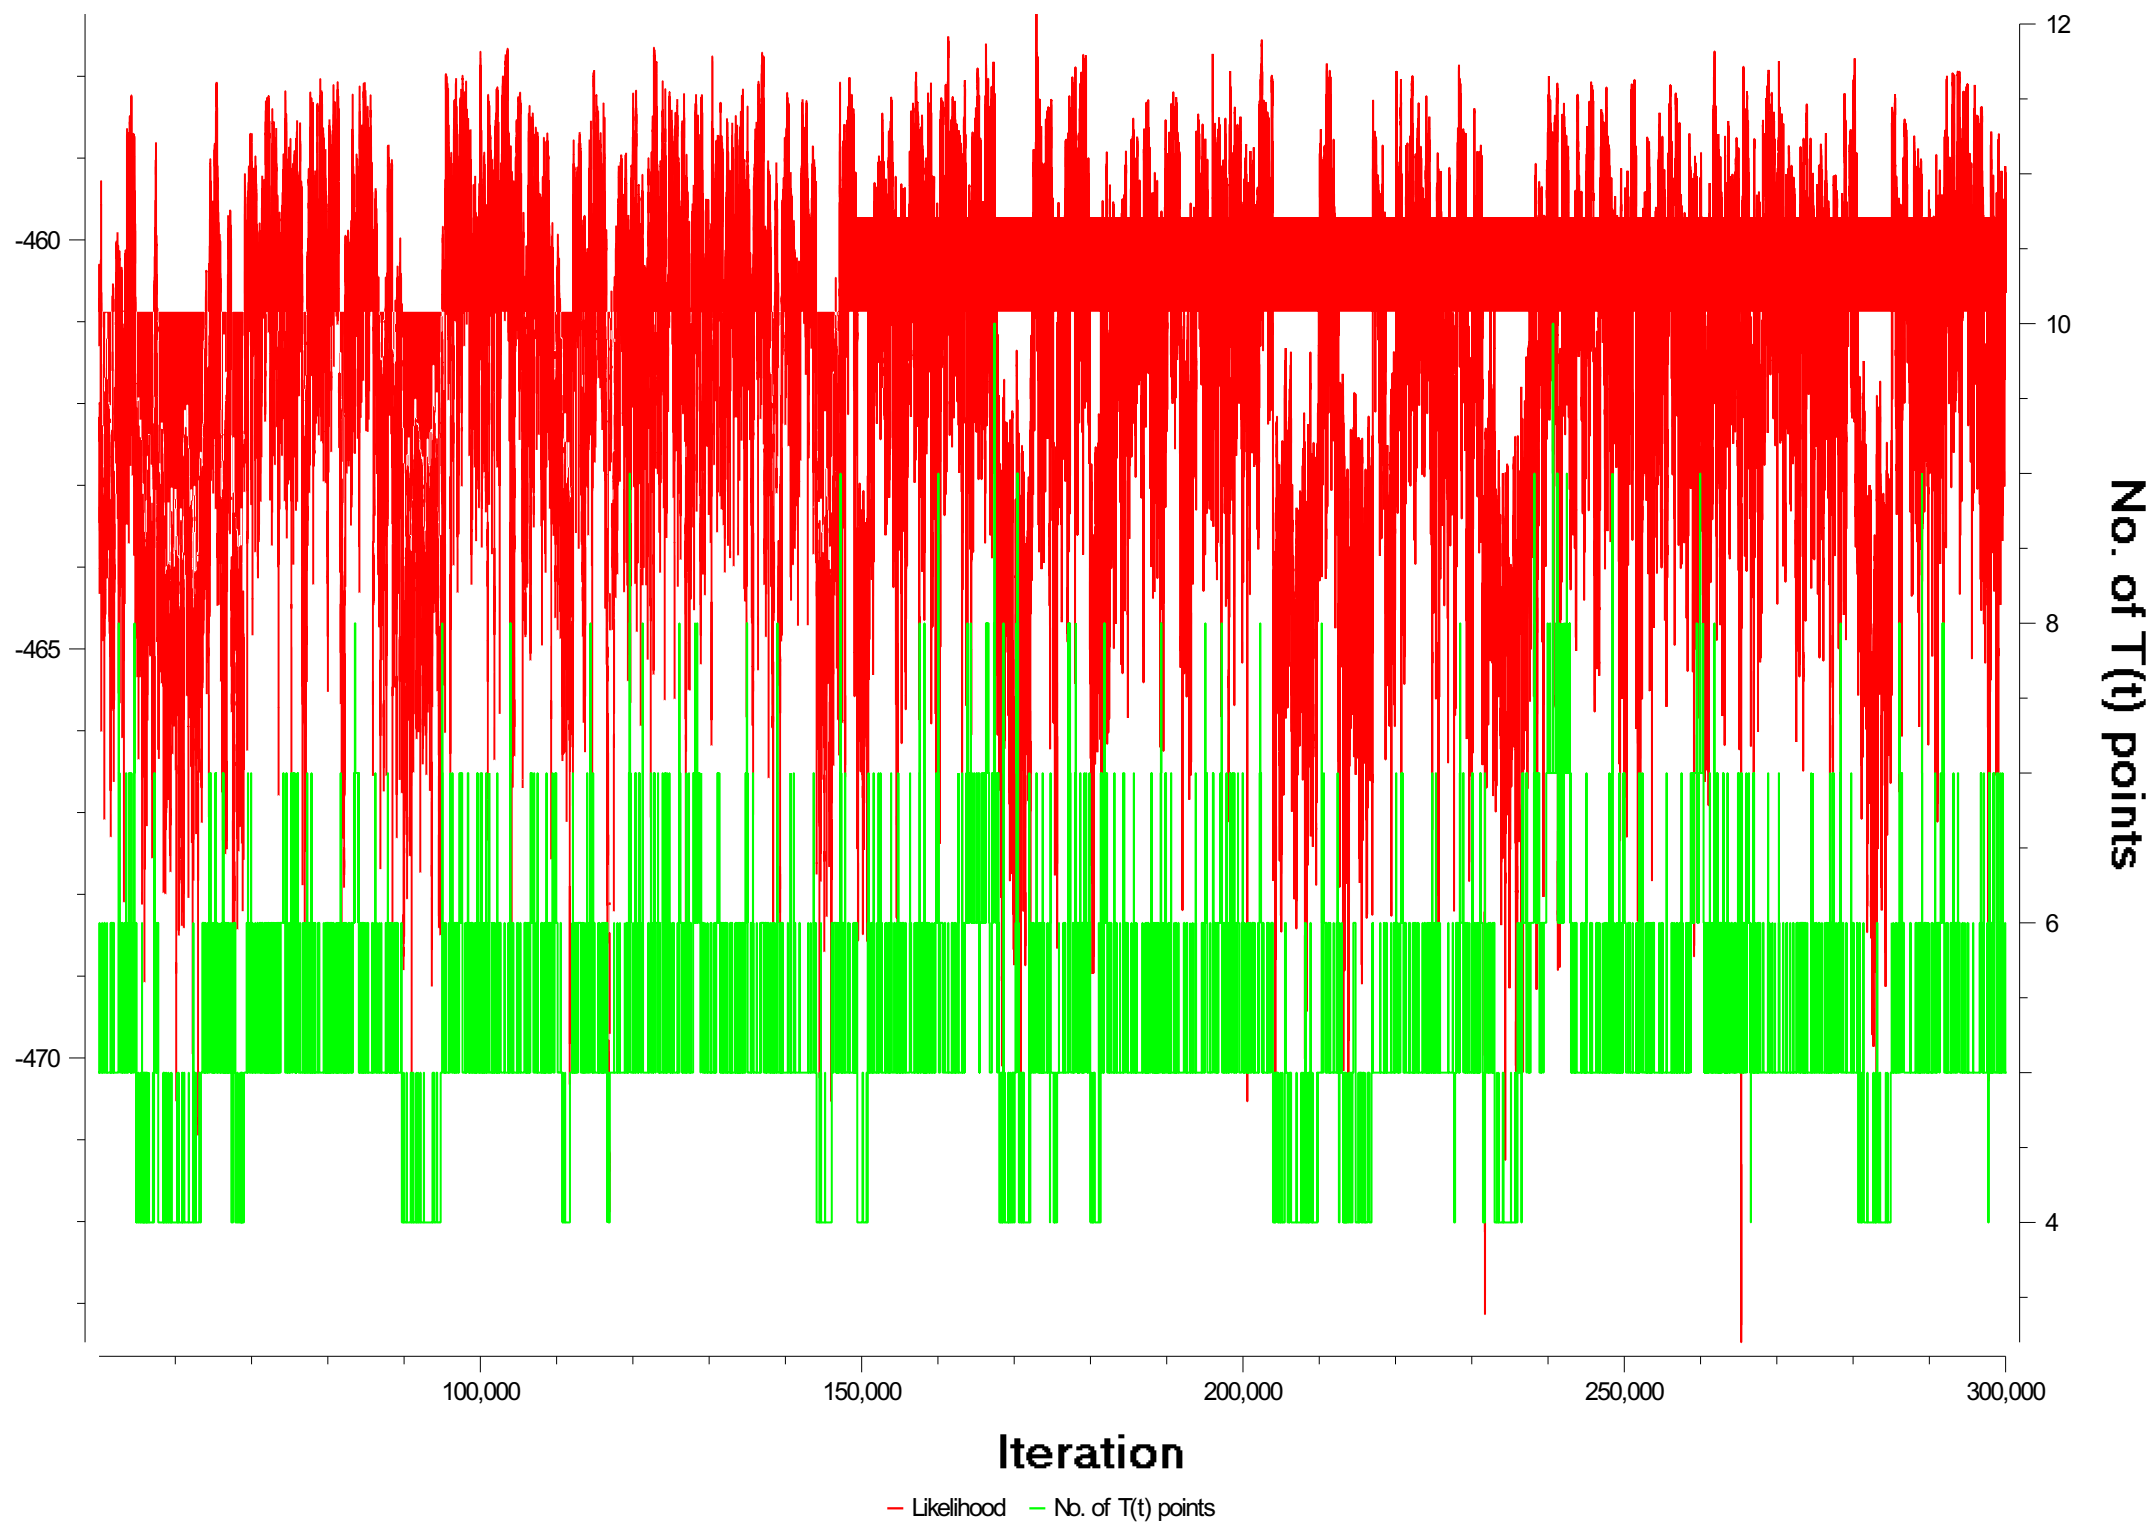

Supplement: Supplementary file 32 [file 1]

# Exercise4\_GROUPD-2\_3\_Exercise4\_InputData.txt 10.00m : Max. Like

No. of tracks (m)

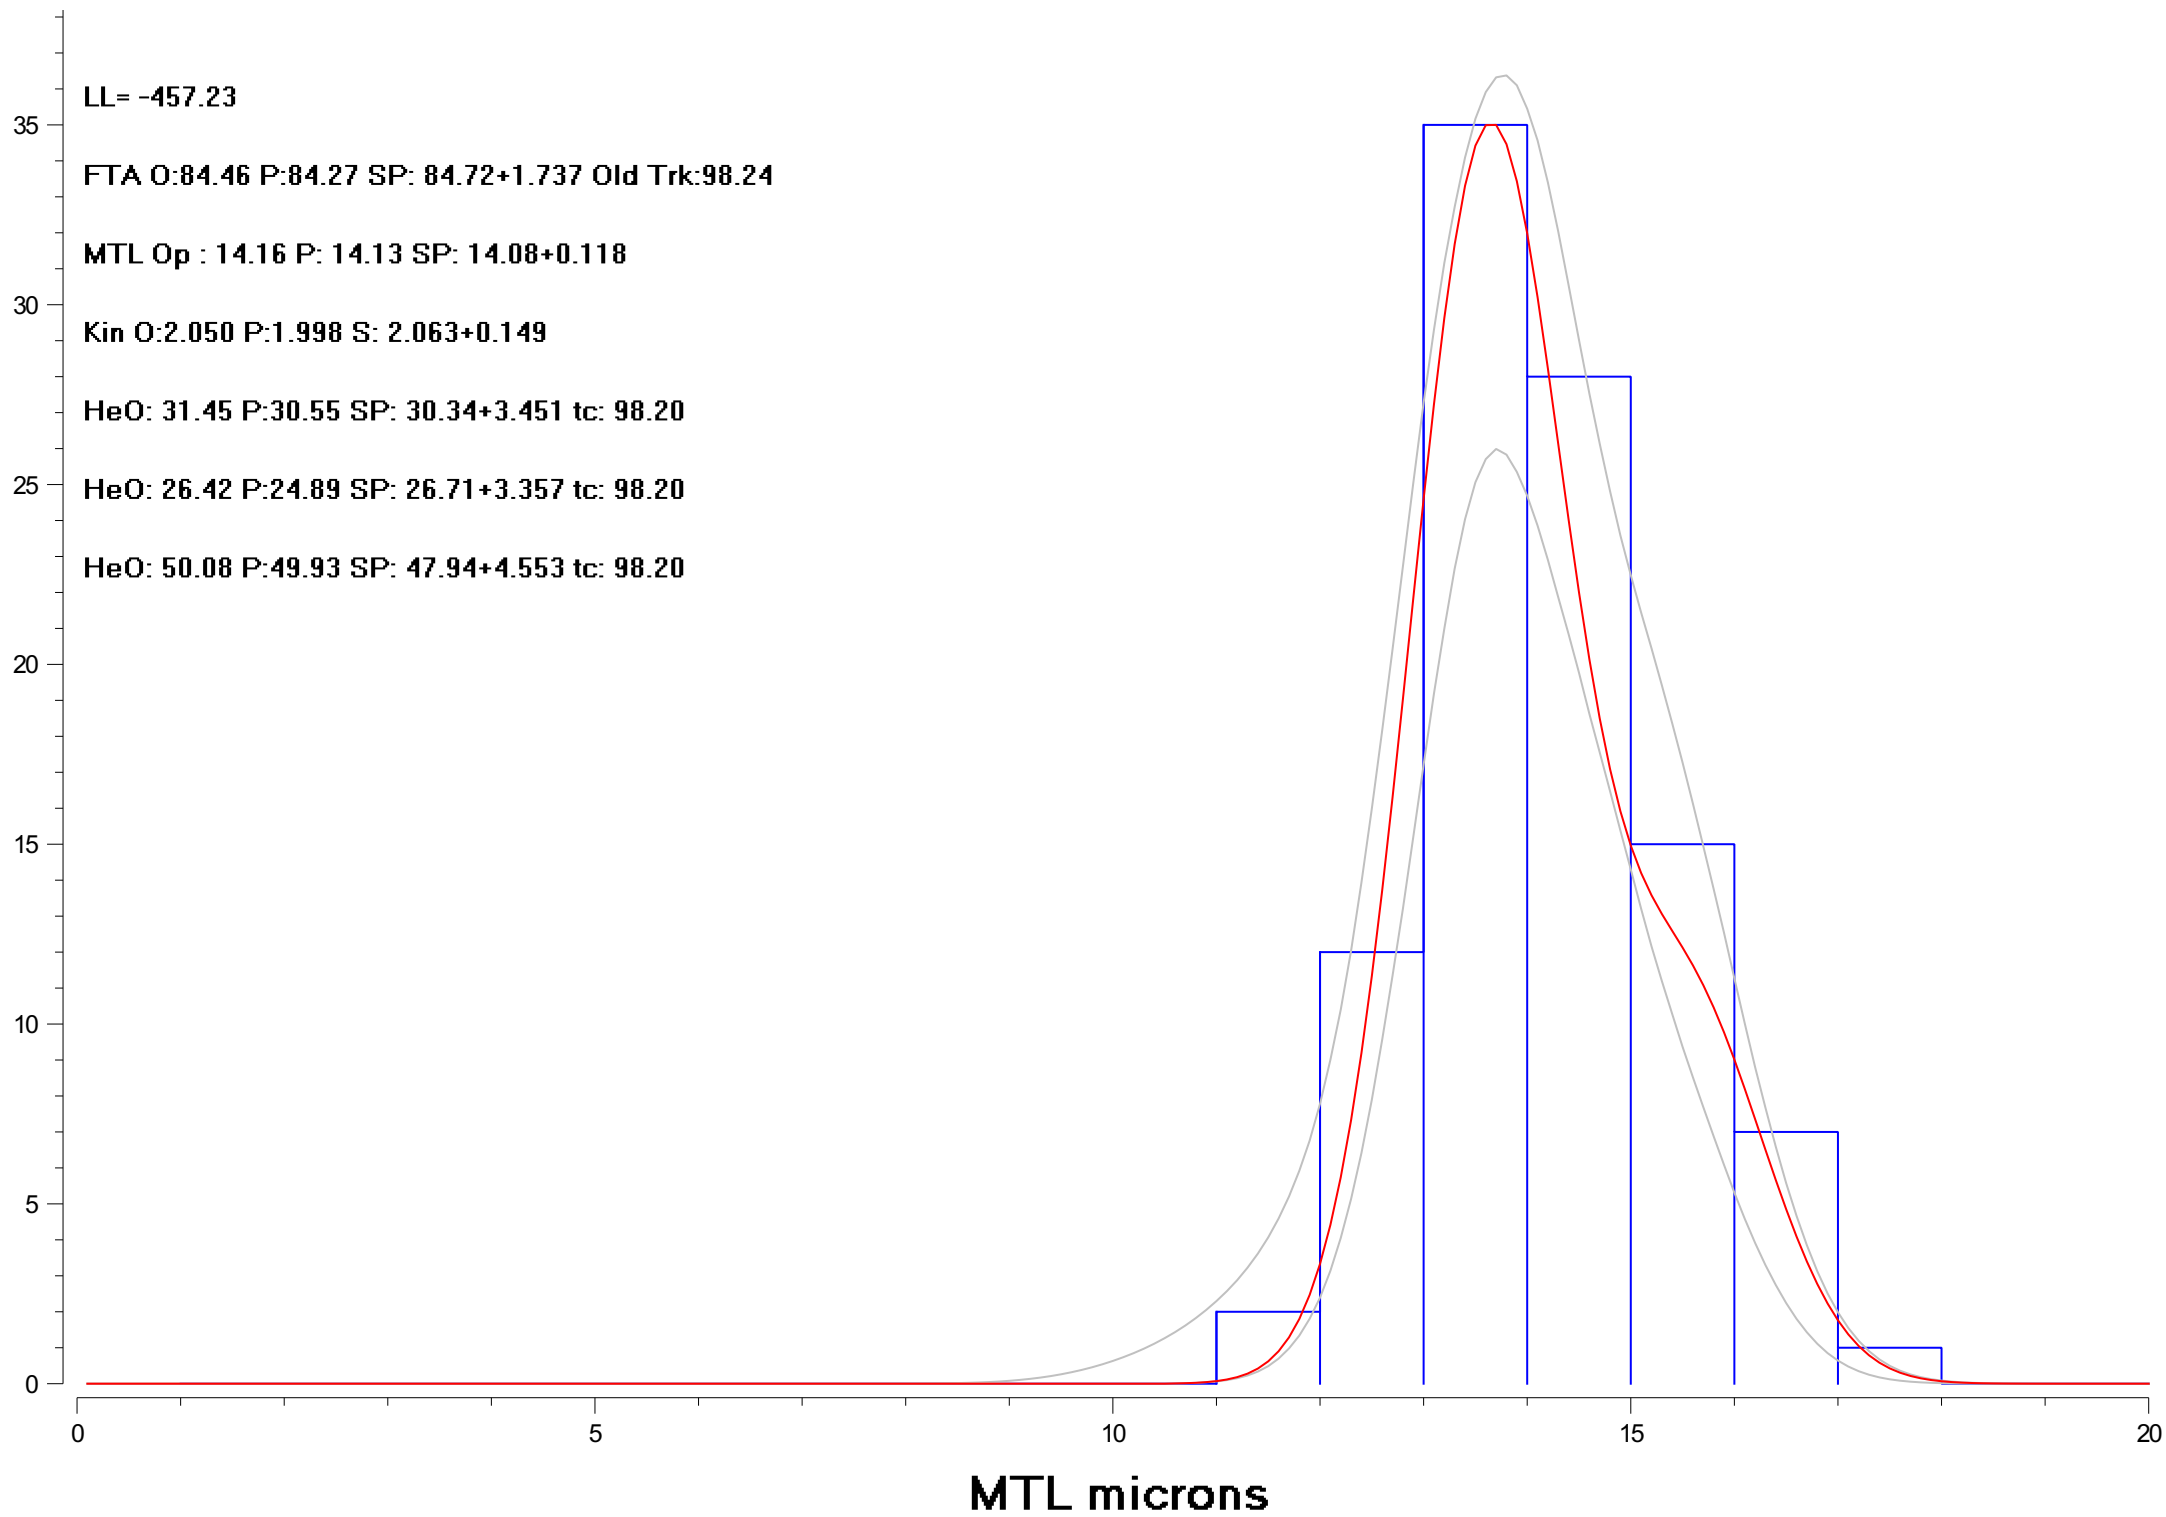

Supplement: Supplementary file 33 [file 1]

# Exercise4\_GROUPB-1\_3 : Max Like

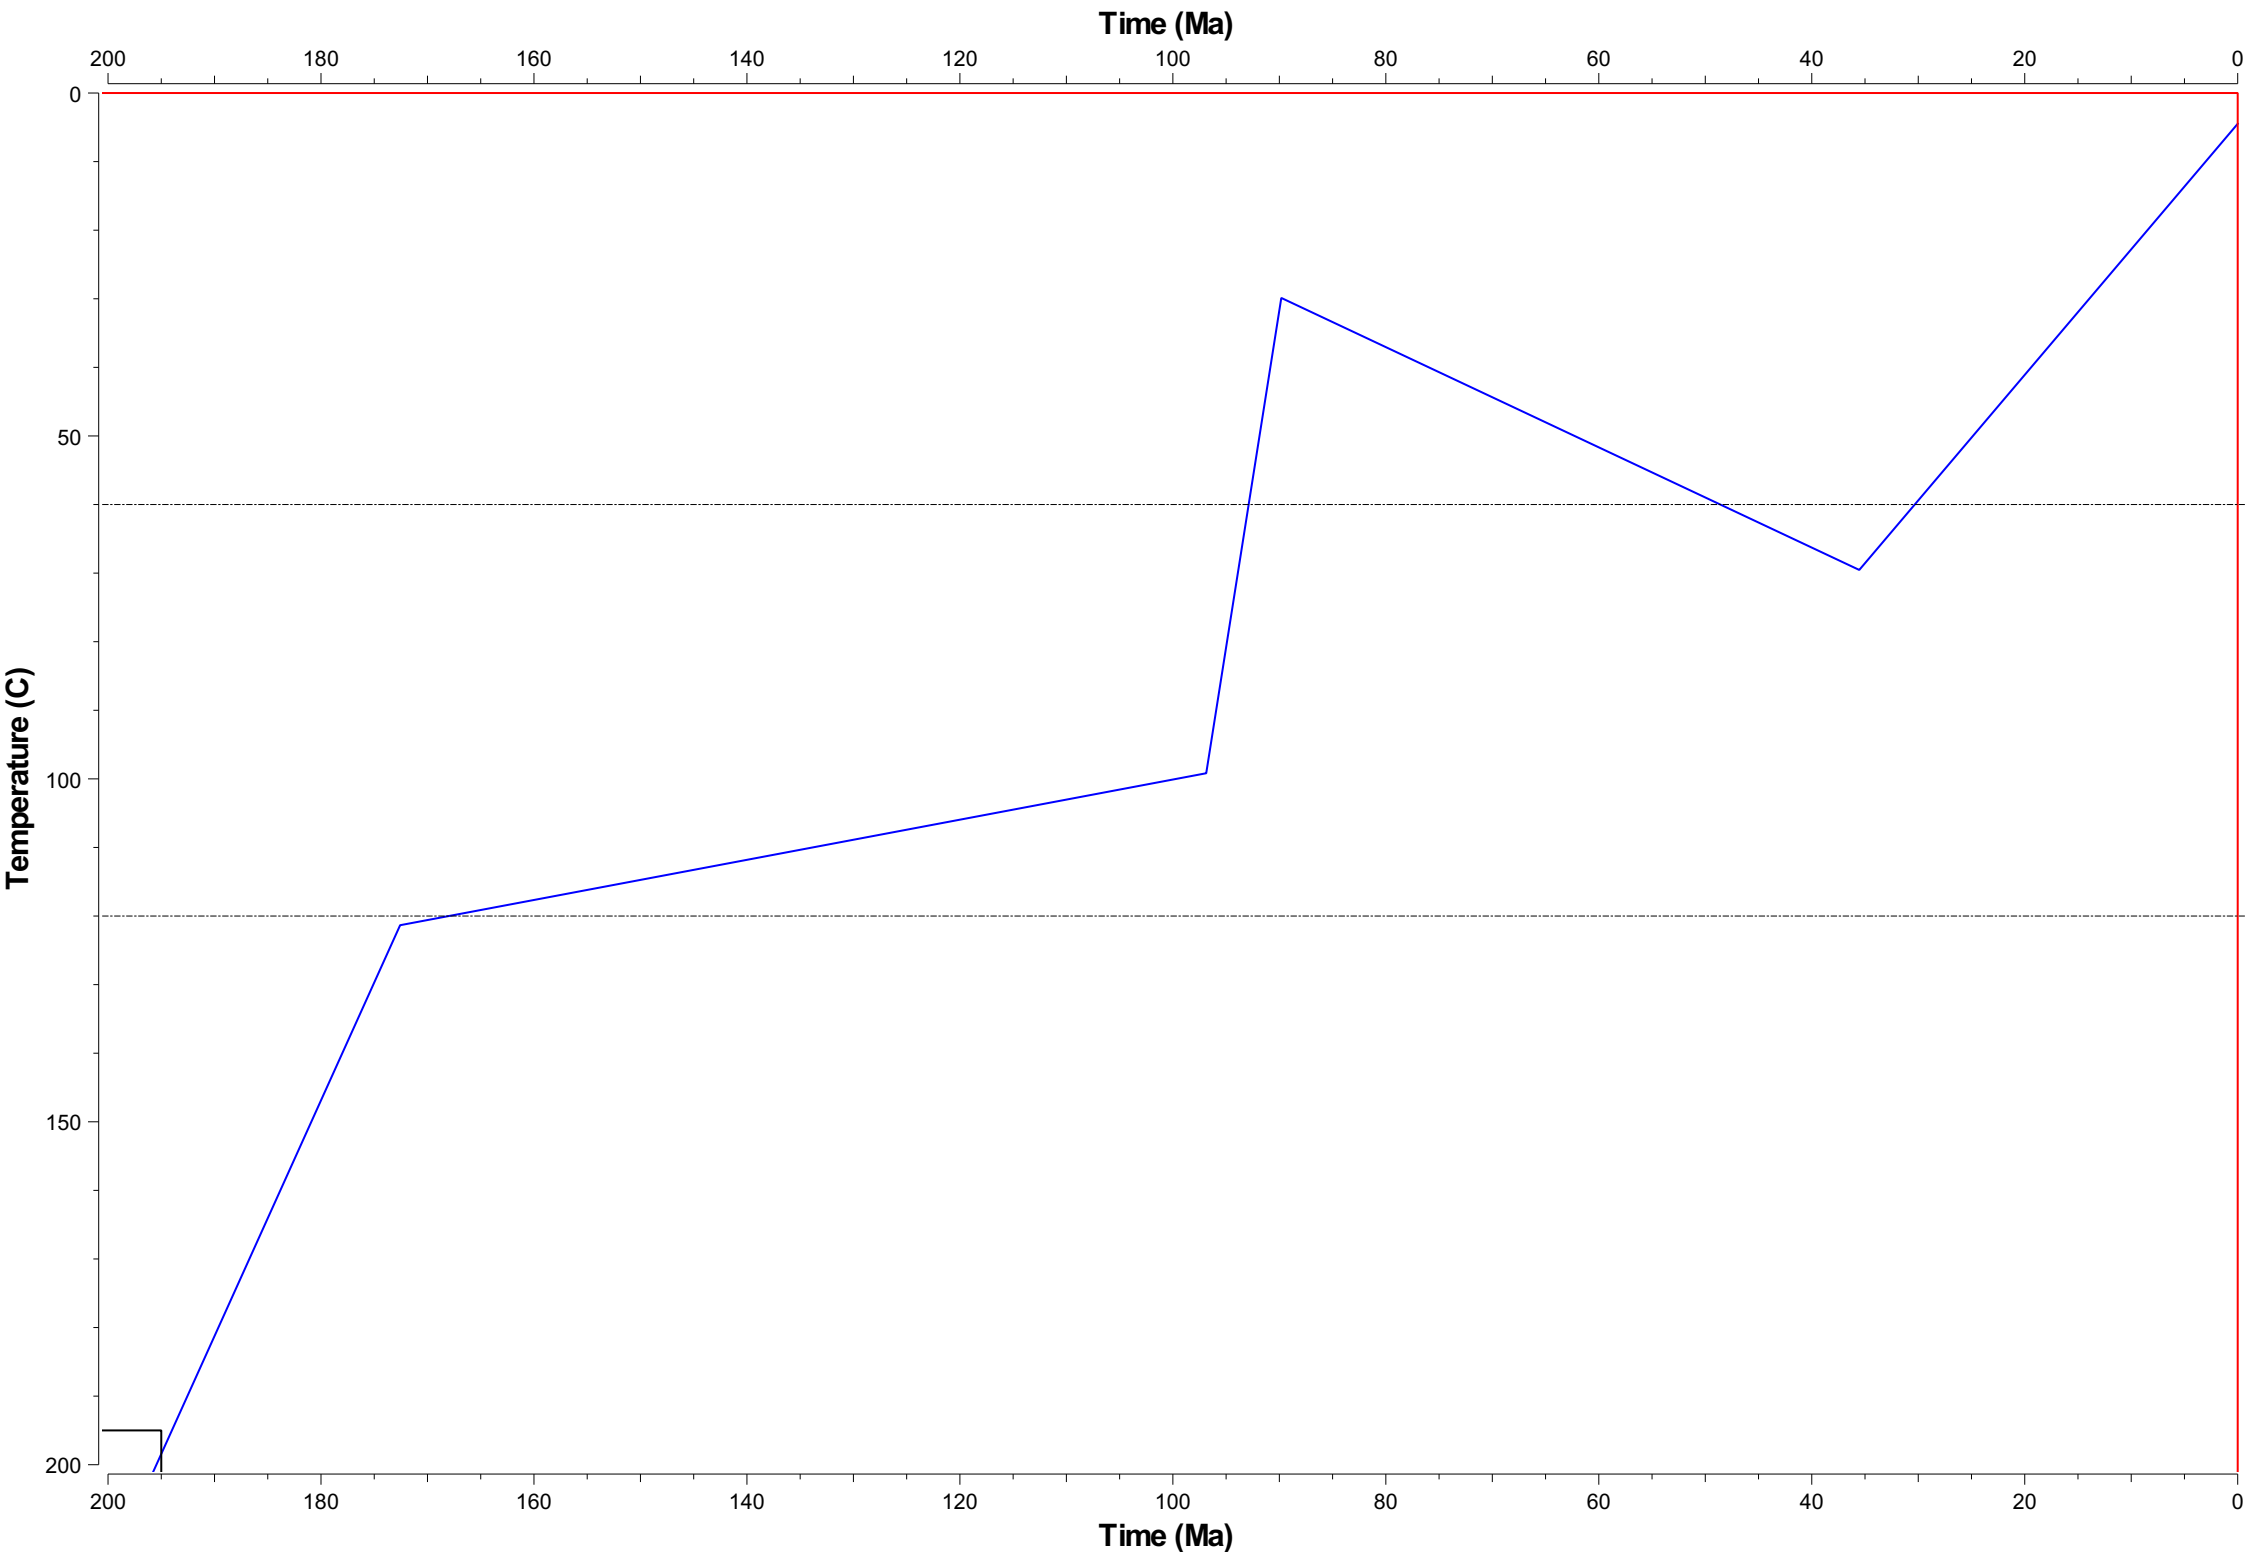

Supplement: Supplementary file 34 [file 1]

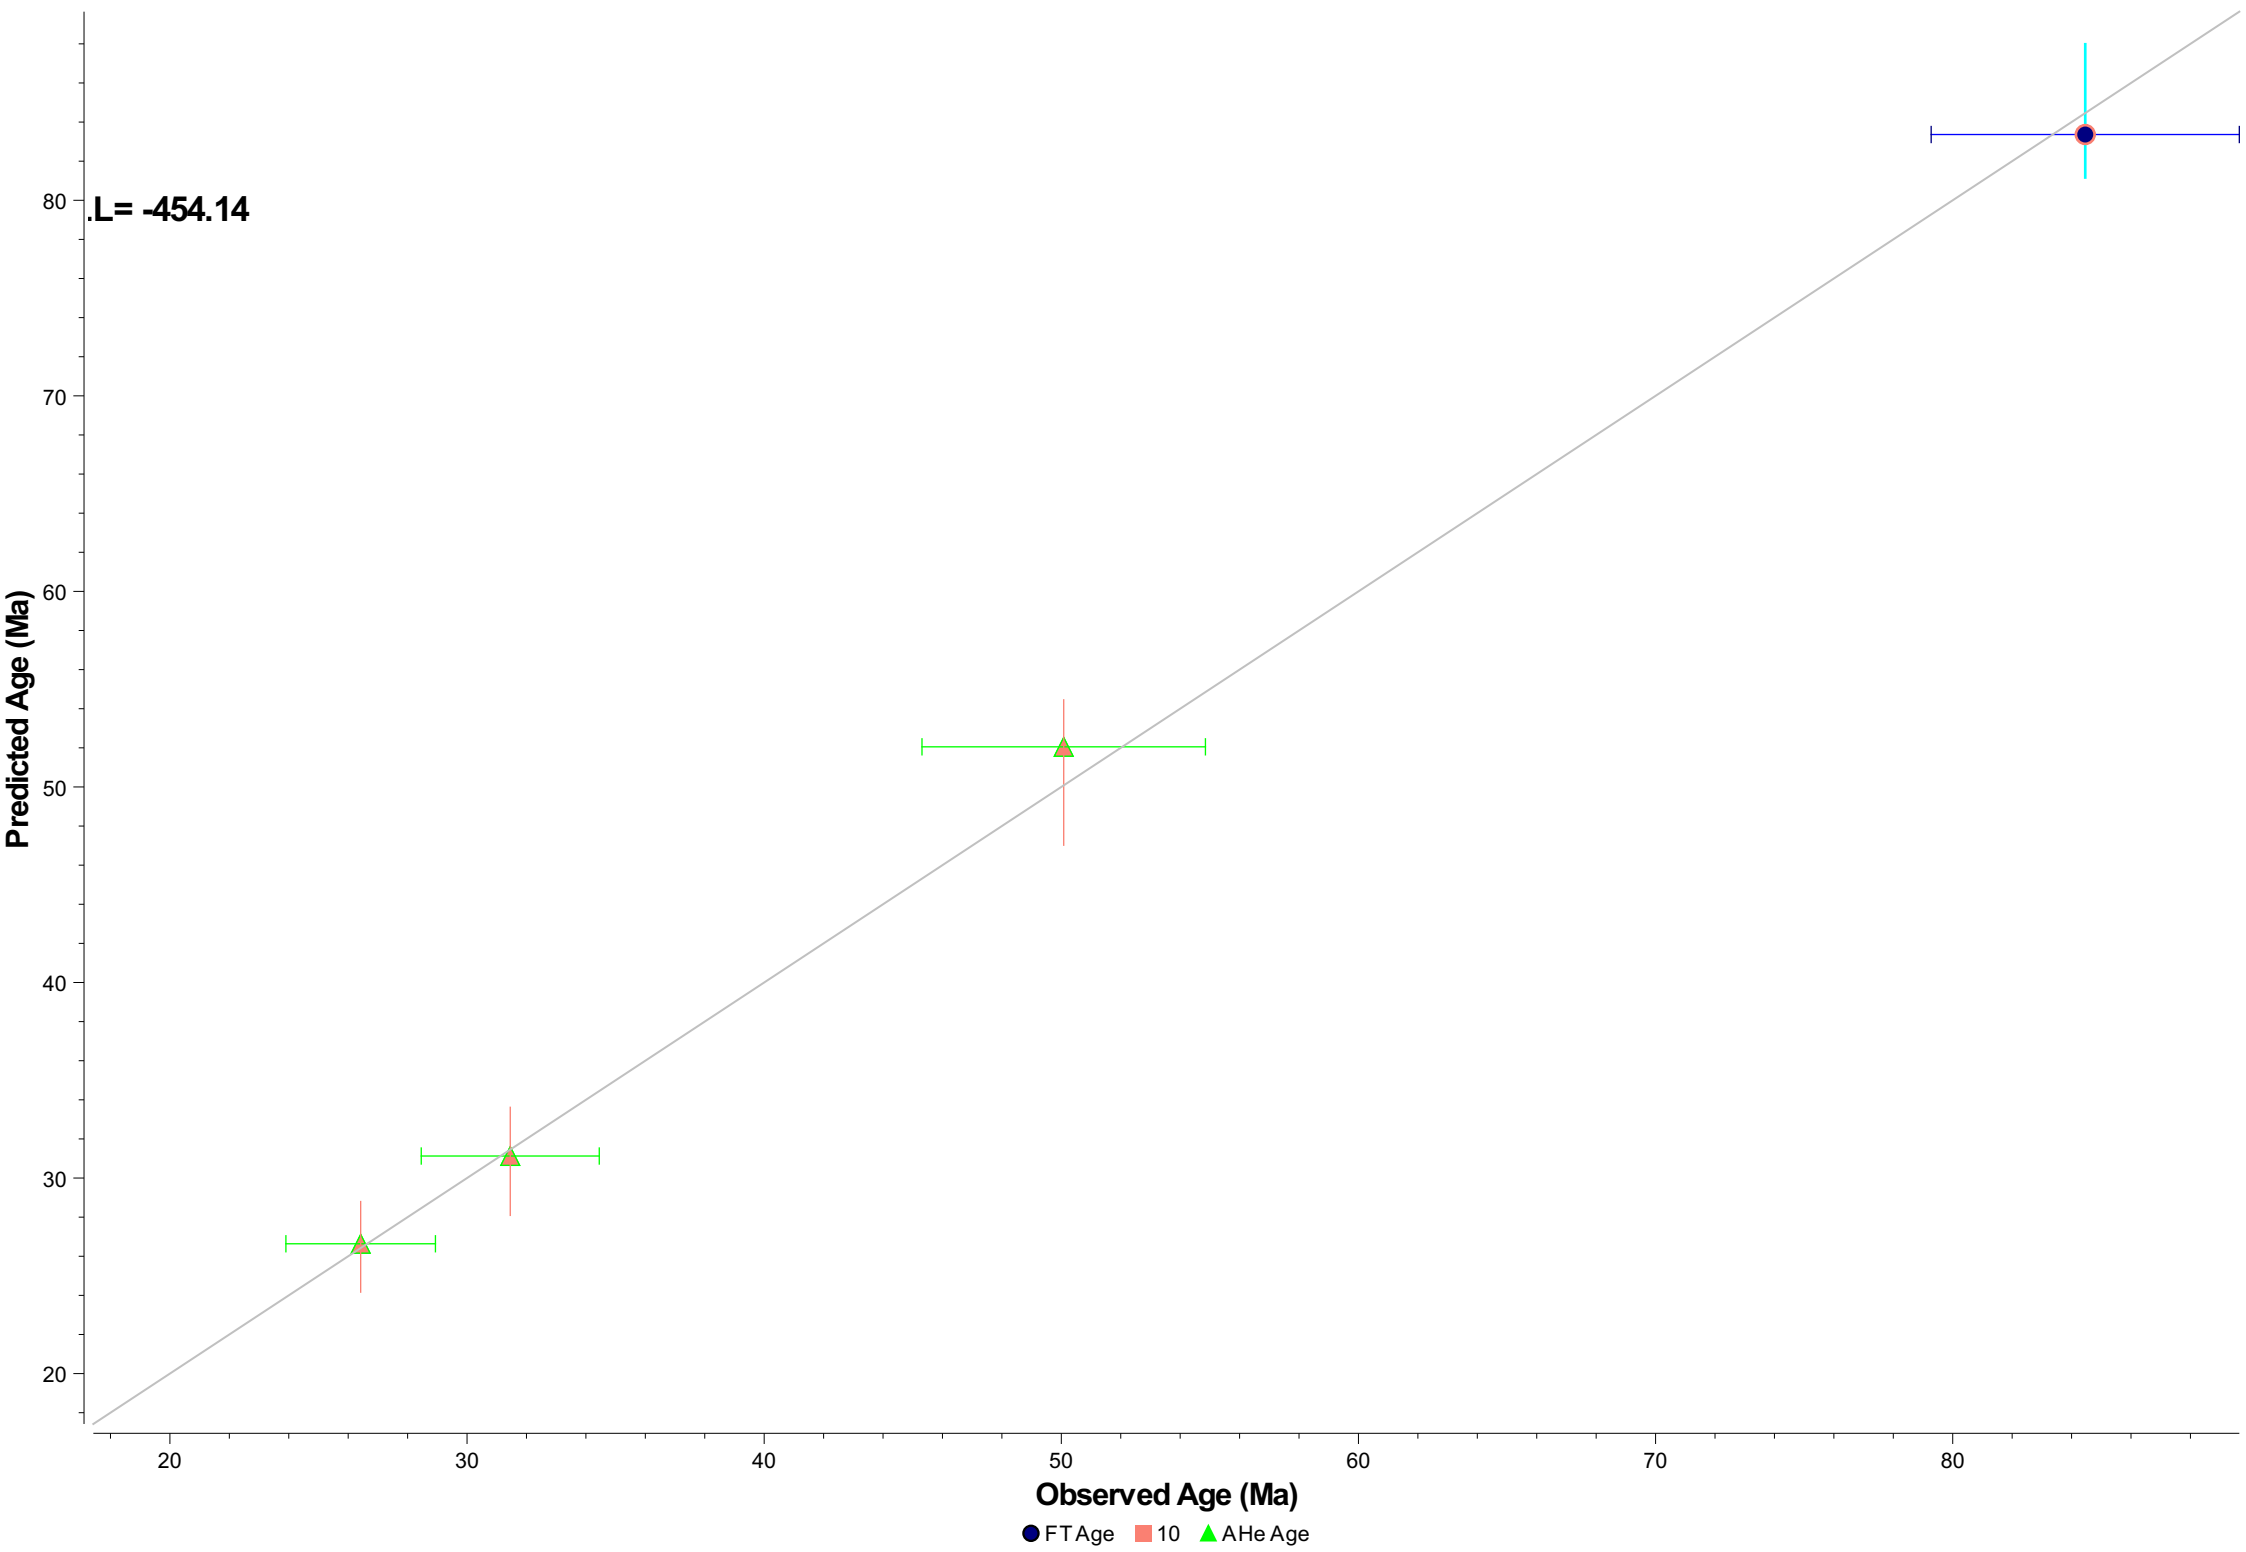

Supplement: Supplementary file 35 [file 1]

# Exercise4\_GROUPC-1\_3 : EXPECTED

Time (Ma)

Temperature (C)

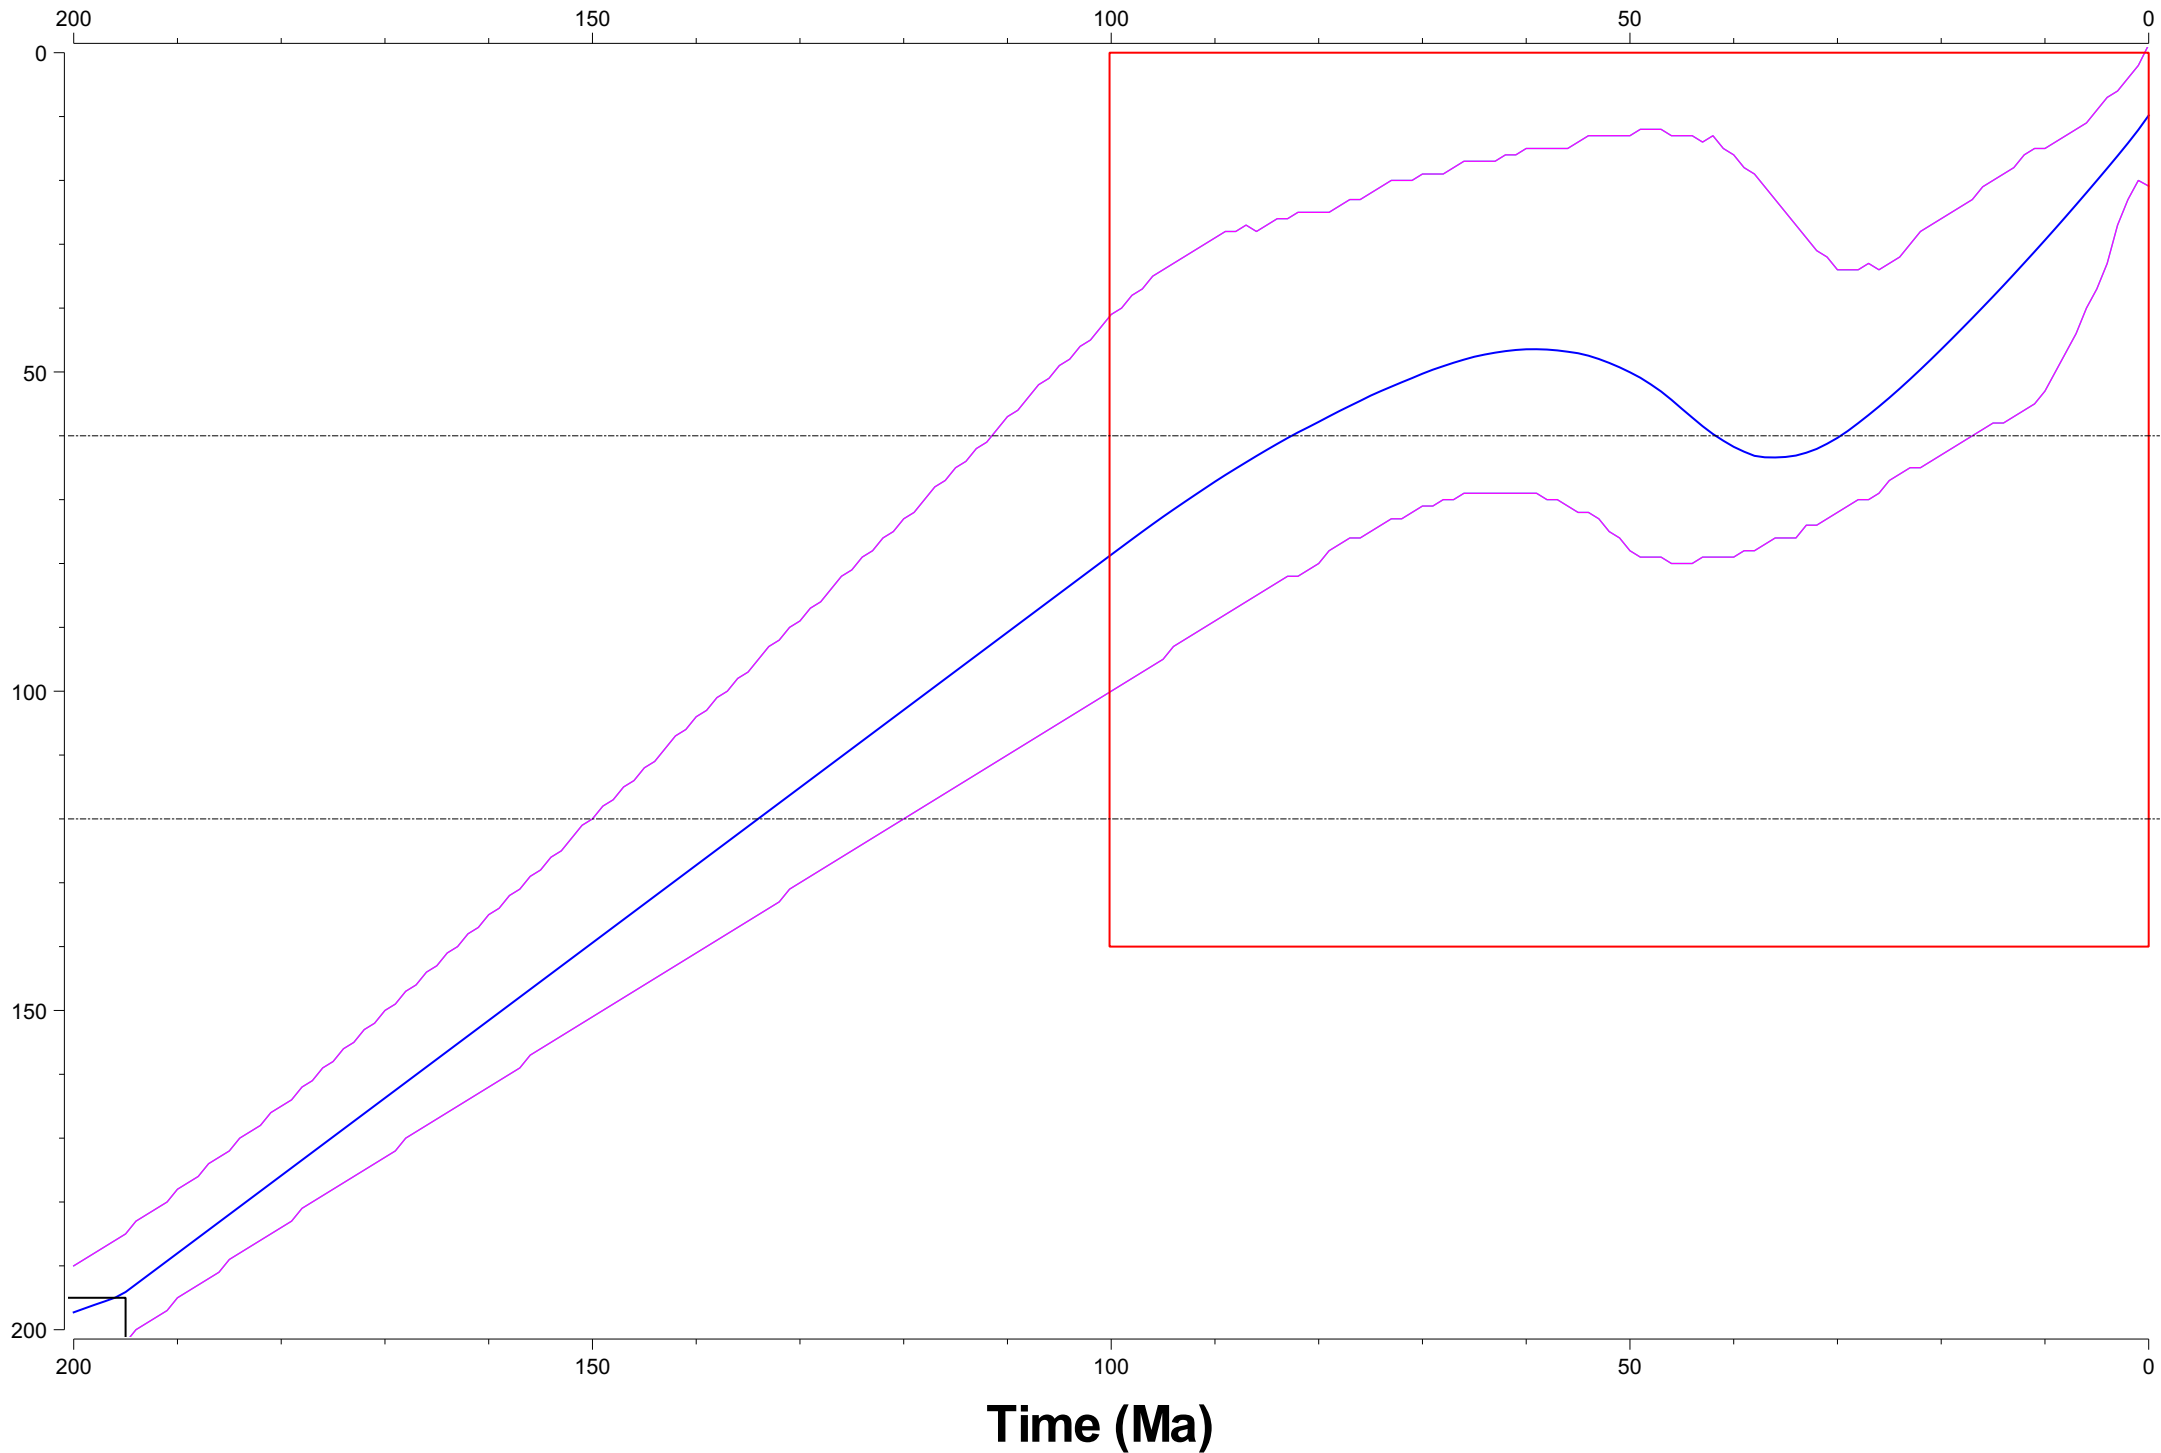

Supplement: Supplementary file 38 [file 1]

# Exercise4\_GROUPD-1\_3\_Exercise4\_InputData.txt : Max. Likelihood

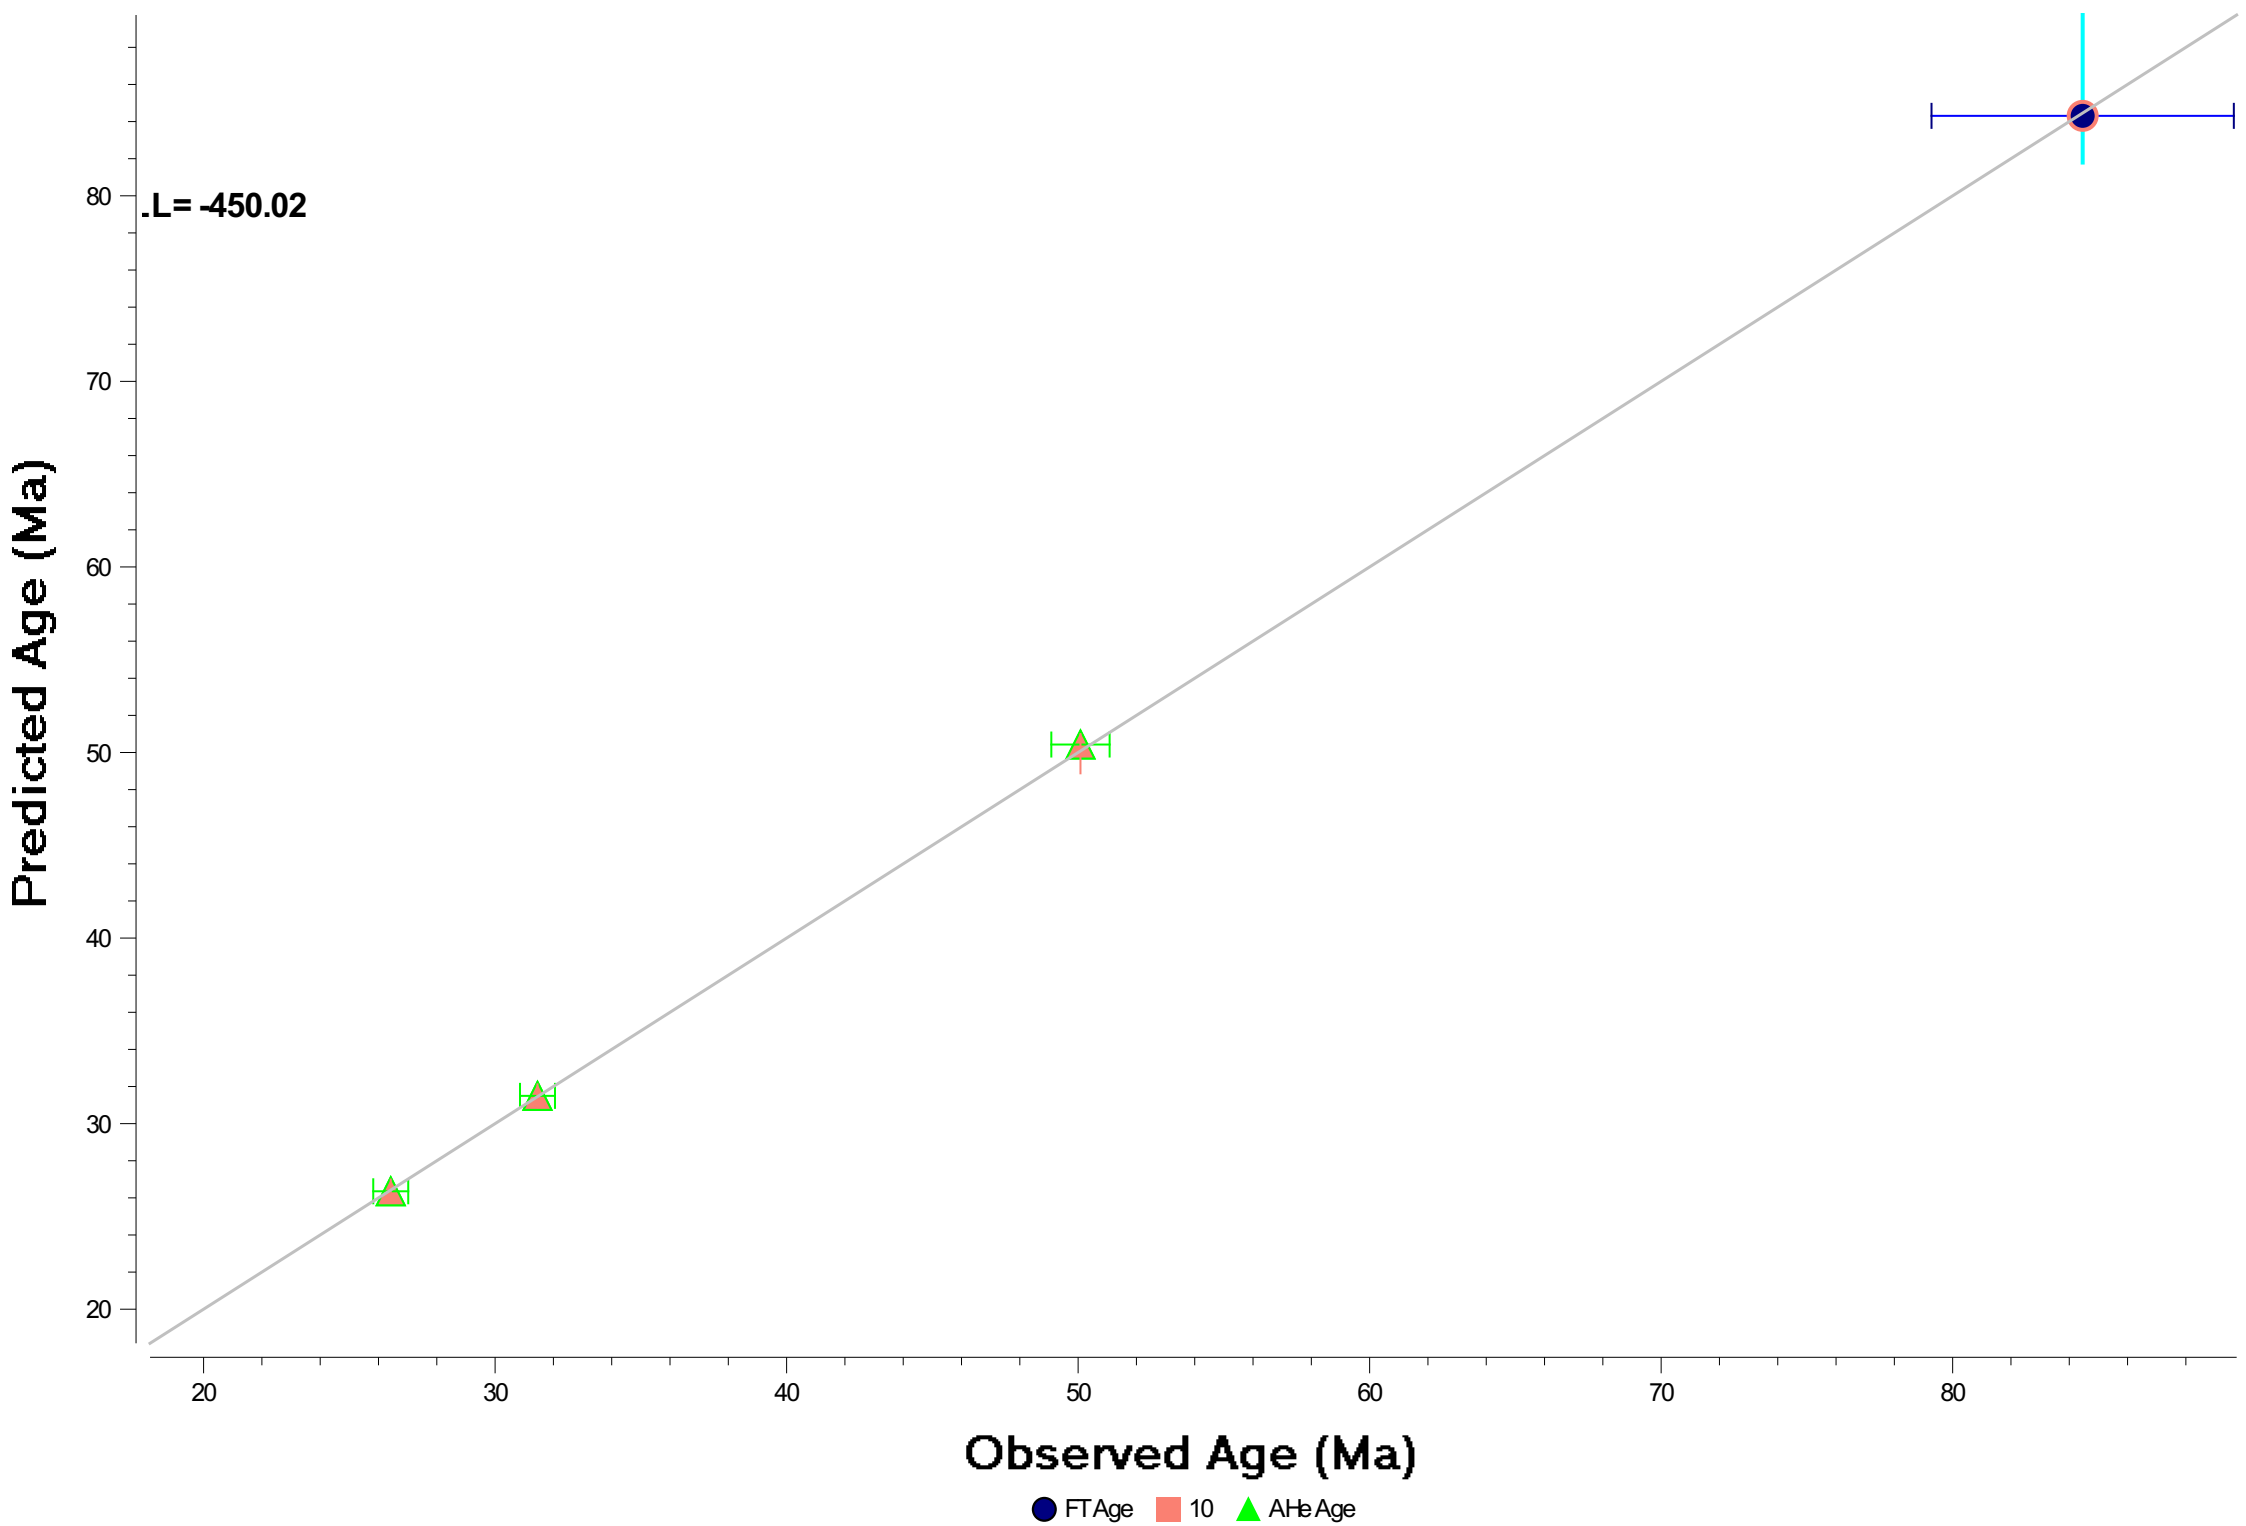

Supplement: Supplementary file 39 [file 1]

# Exercise4\_GROUPA-1\_3\_Exercise4\_InputData.txt : Max. Likelihood

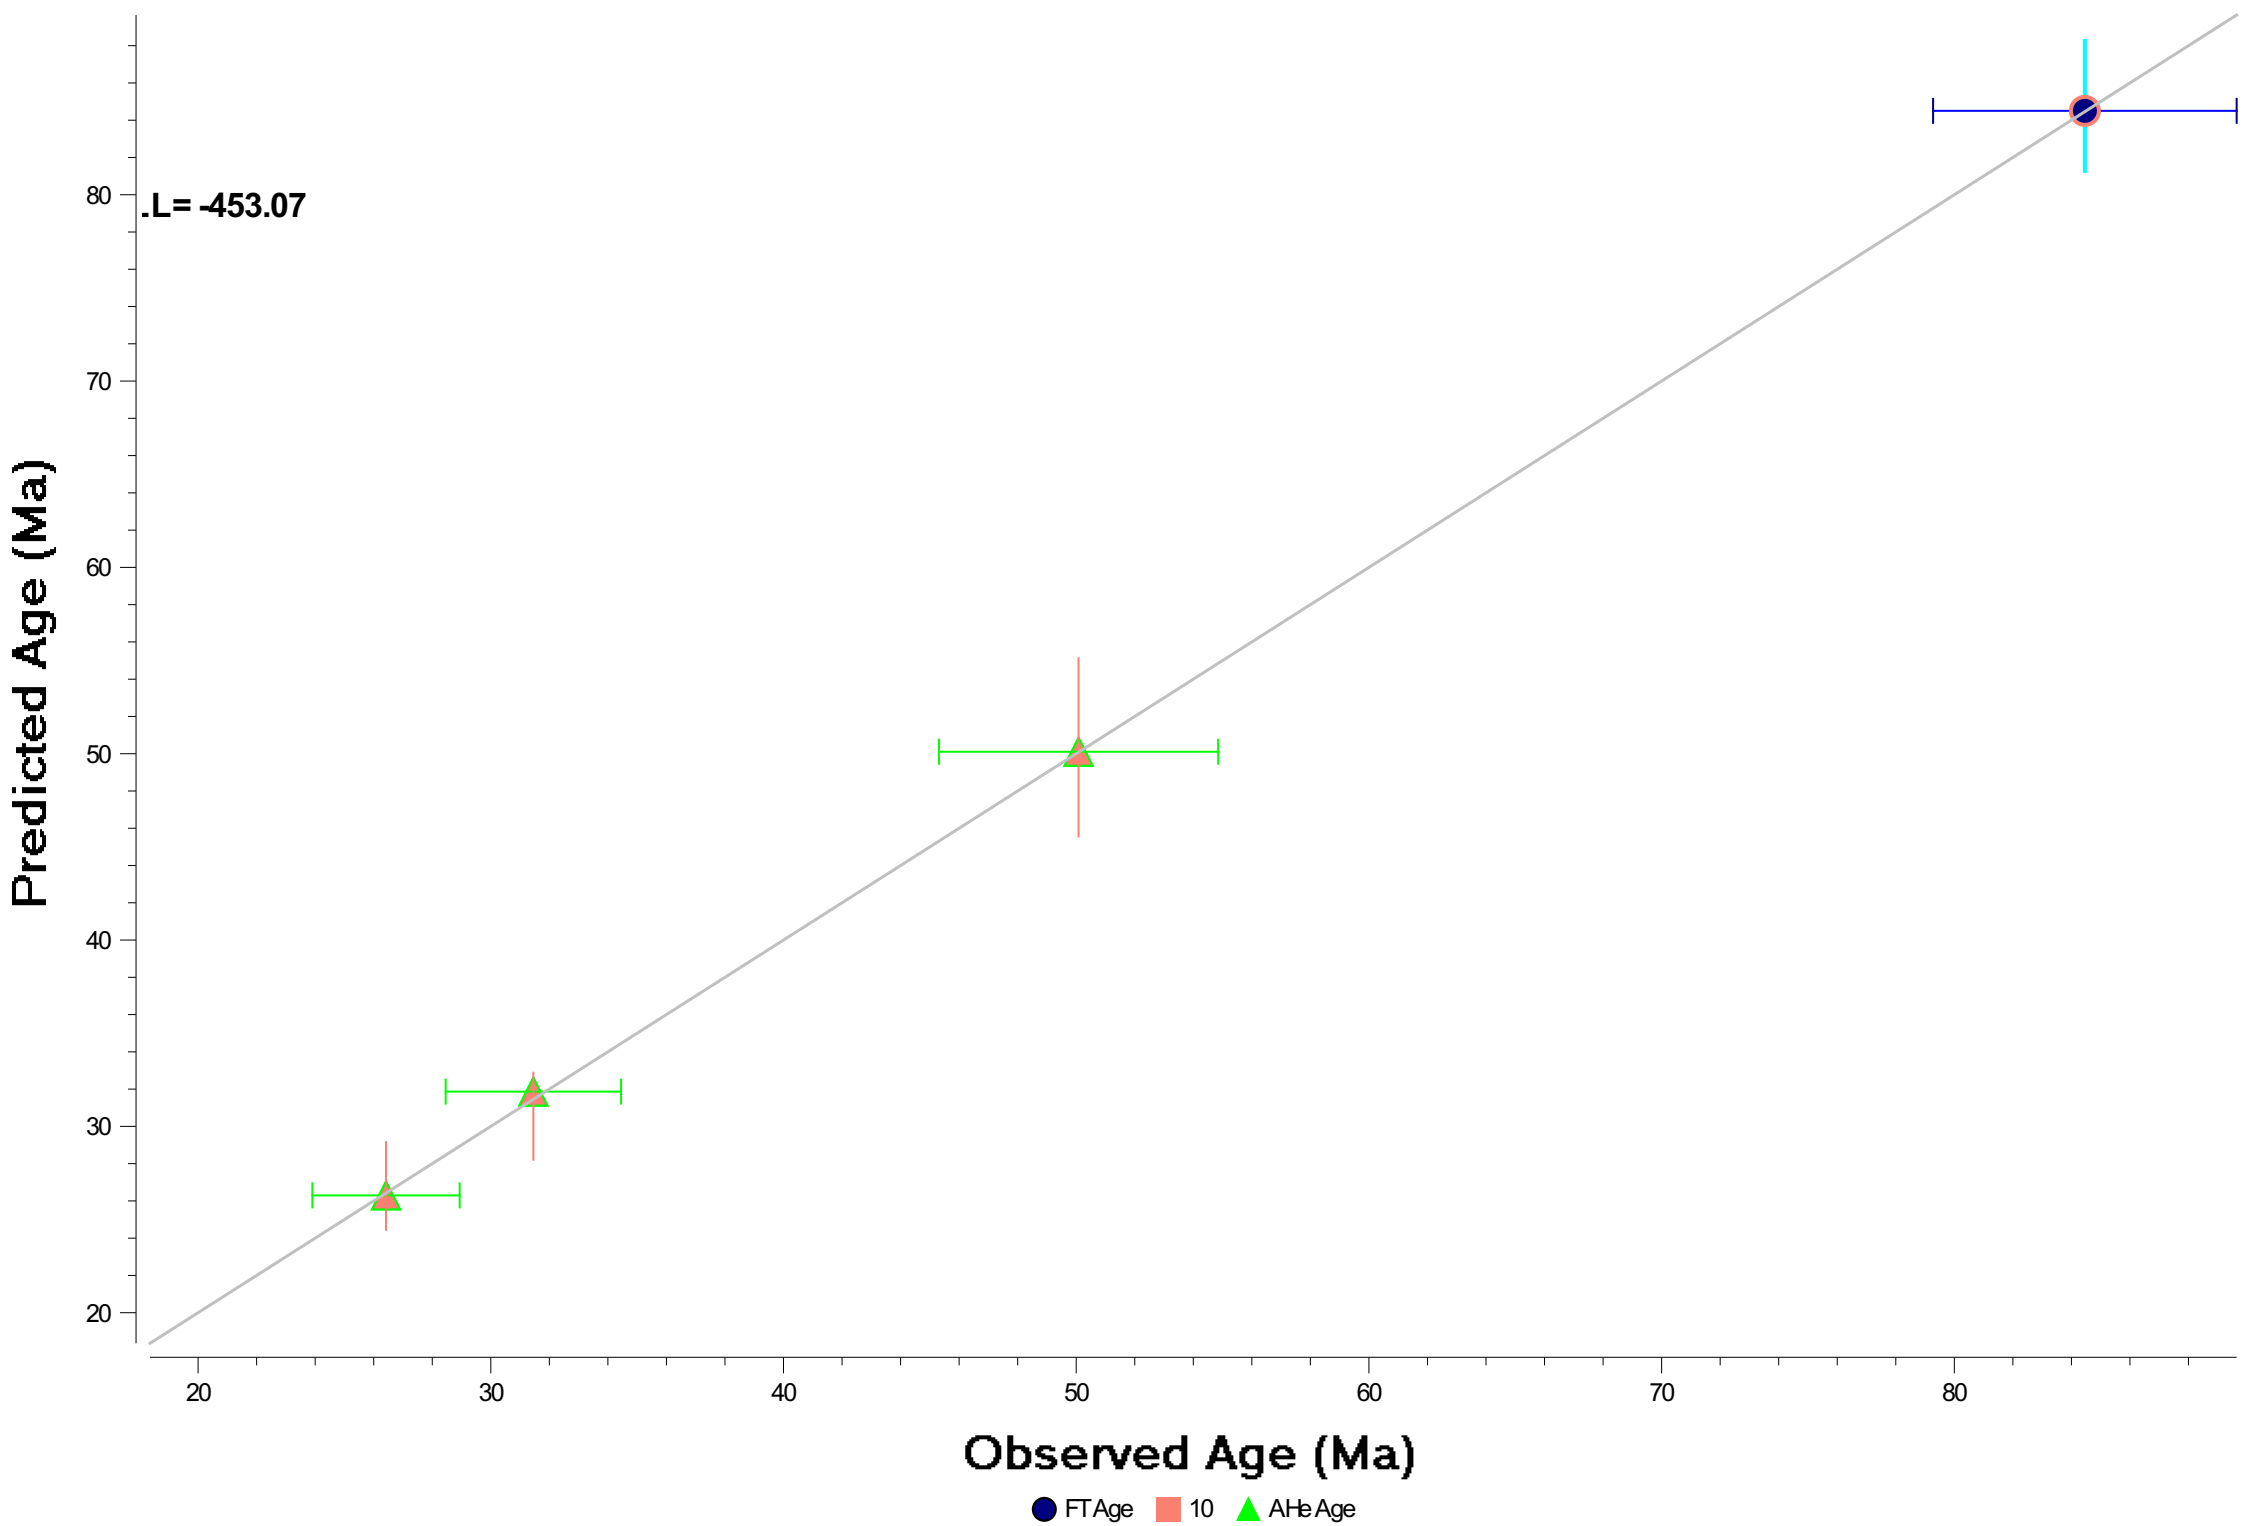

Supplement: Supplementary file 40 [file 1]

# Exercise4\_GROUPA-2\_3\_Exercise4\_InputData.txt : Expected

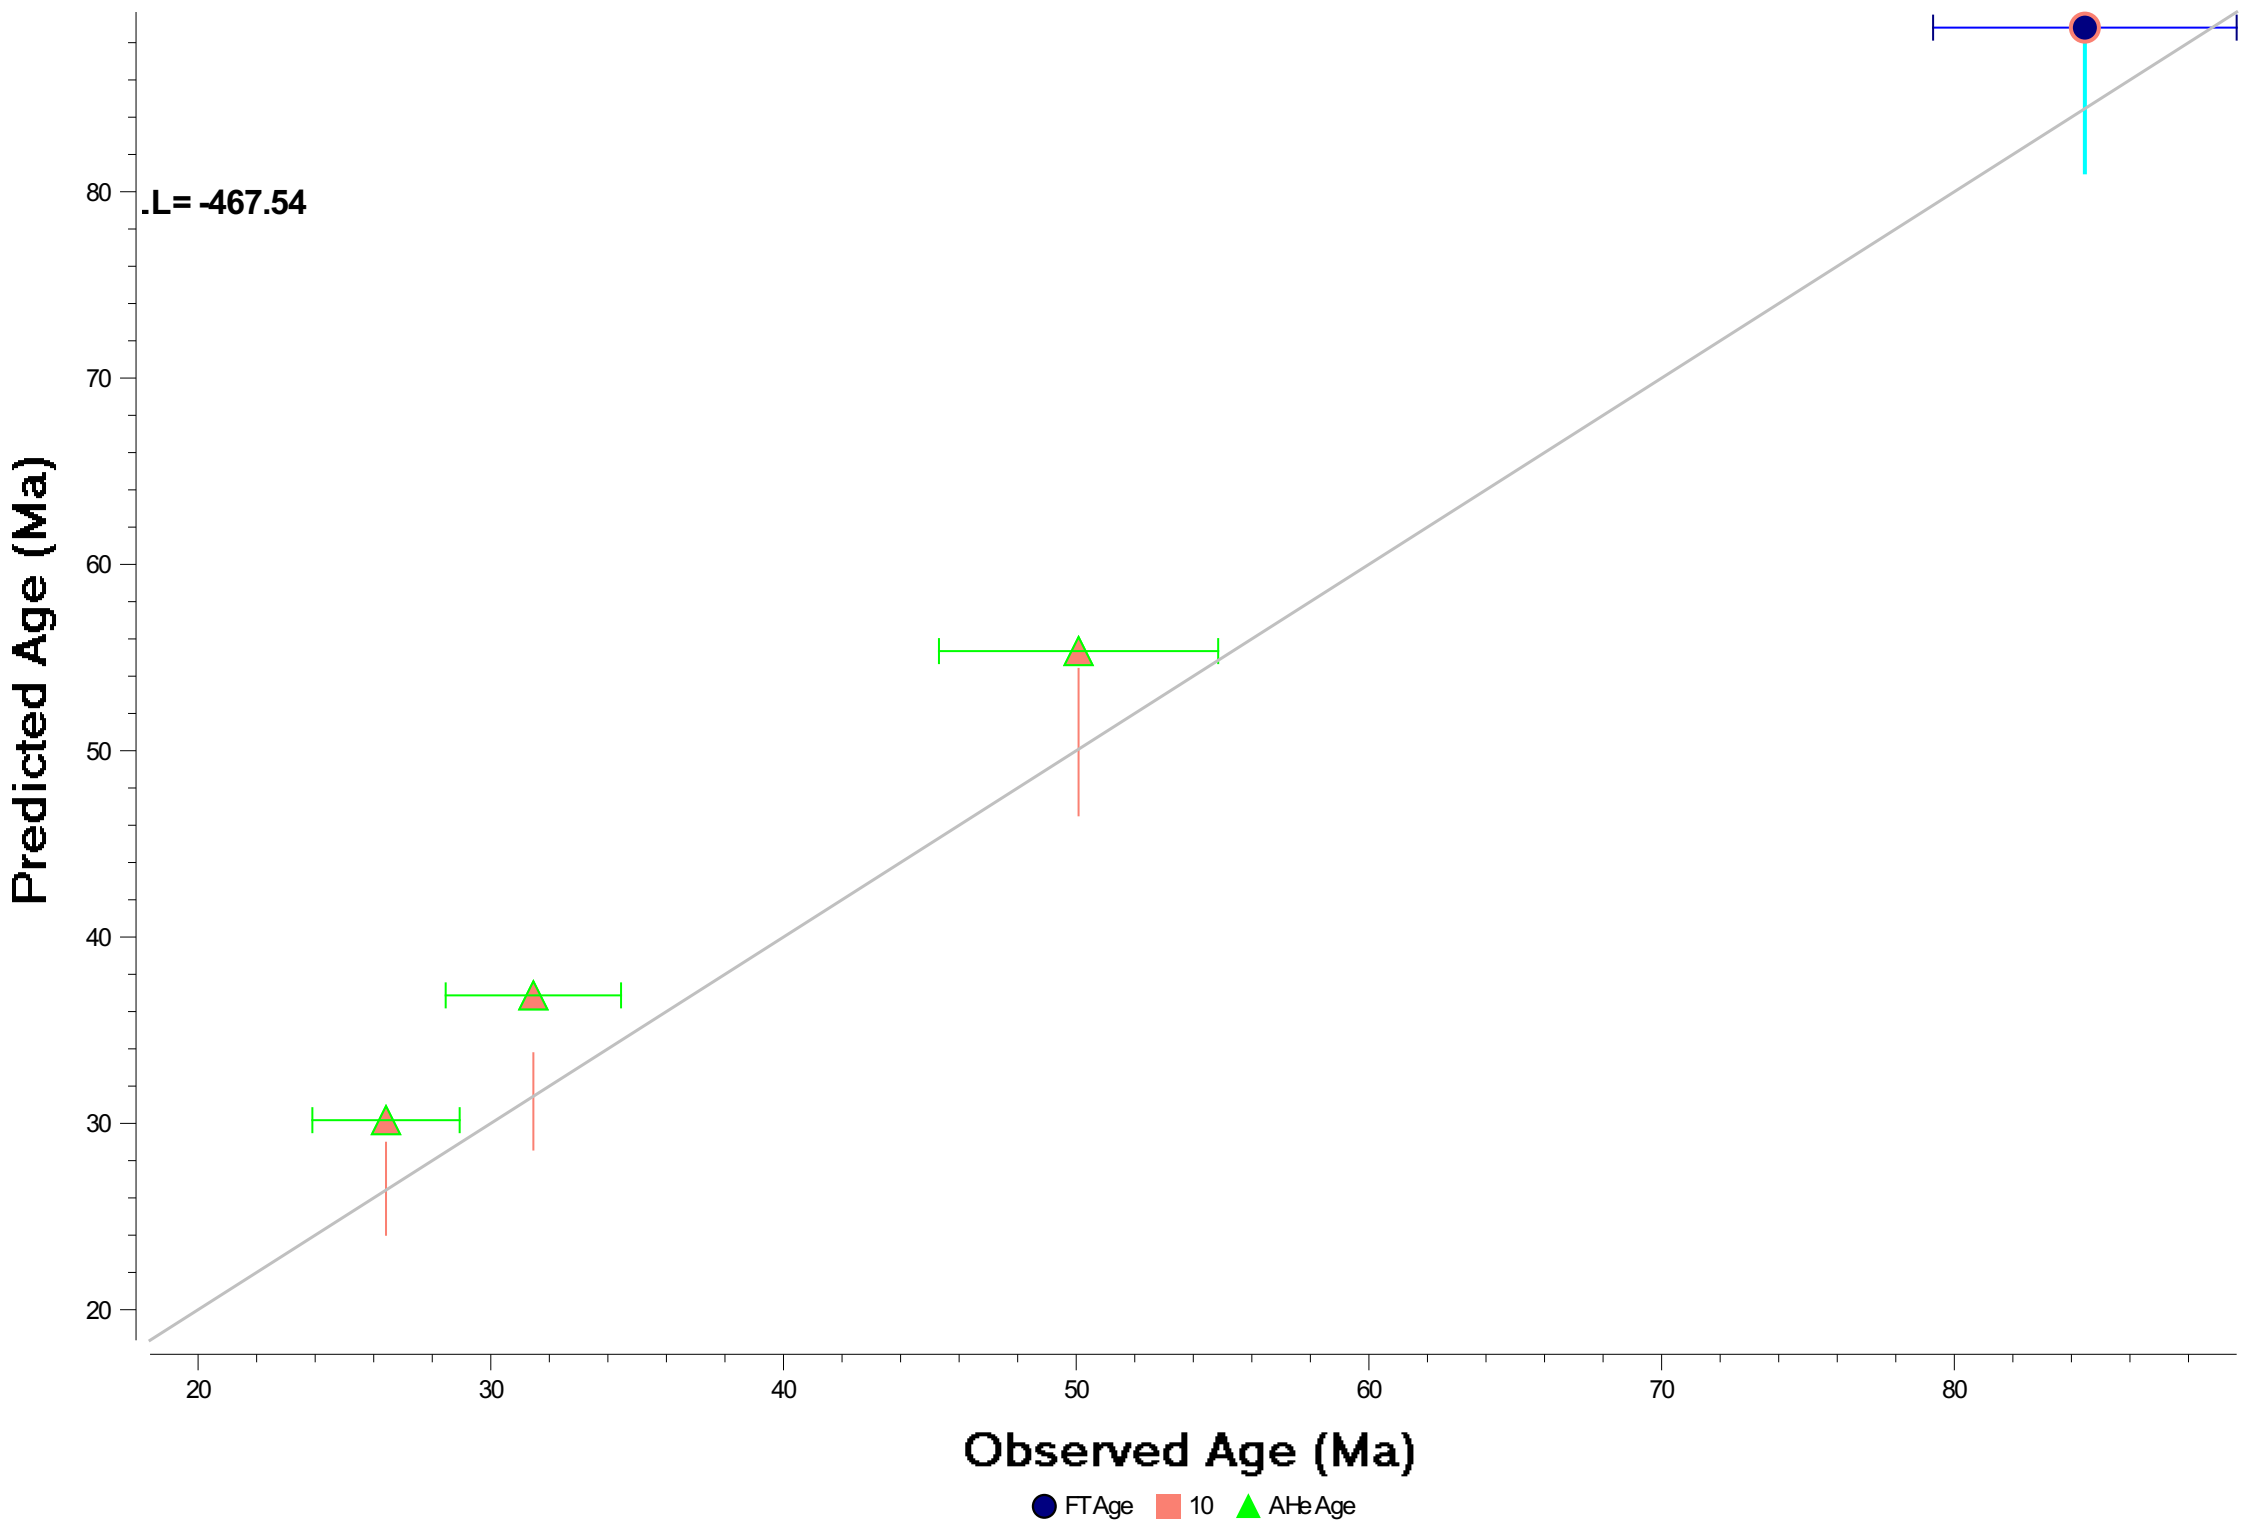

Supplement: Supplementary file 41 [file 1]

# Exercise4\_GROUPA-2\_3 : Max Post

Time (Ma)

Temperature (C)

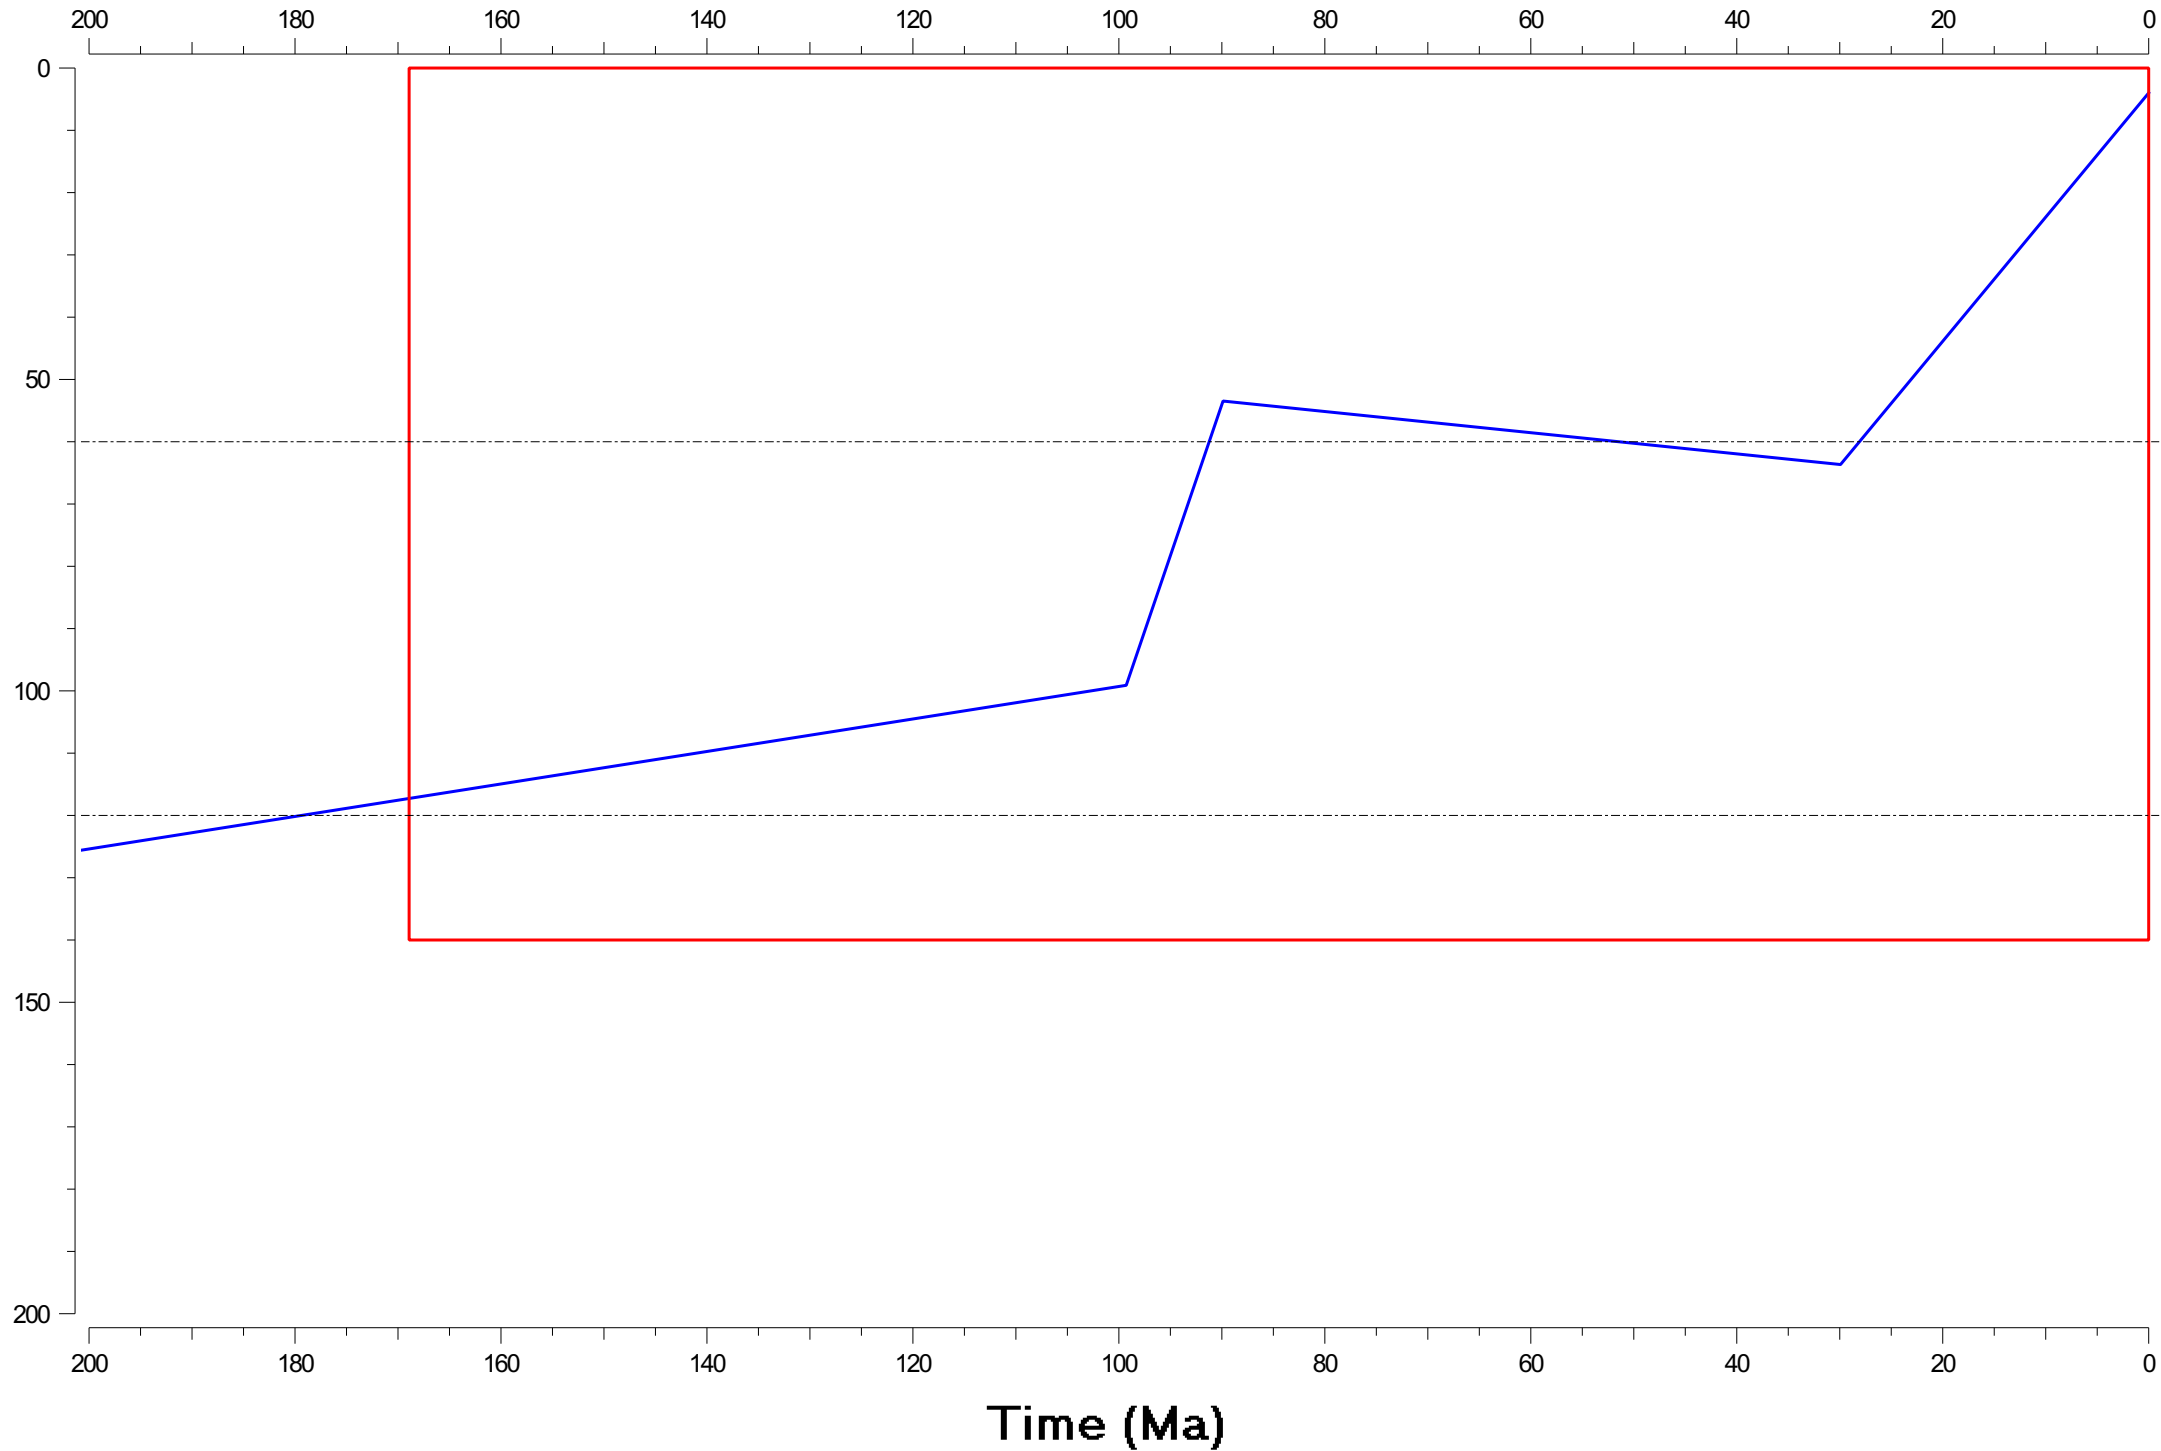

Supplement: Supplementary file 43 [file 1]

# Exercise4\_GROUPA-1\_3 : Max Post

Time (Ma)

Temperature (C)

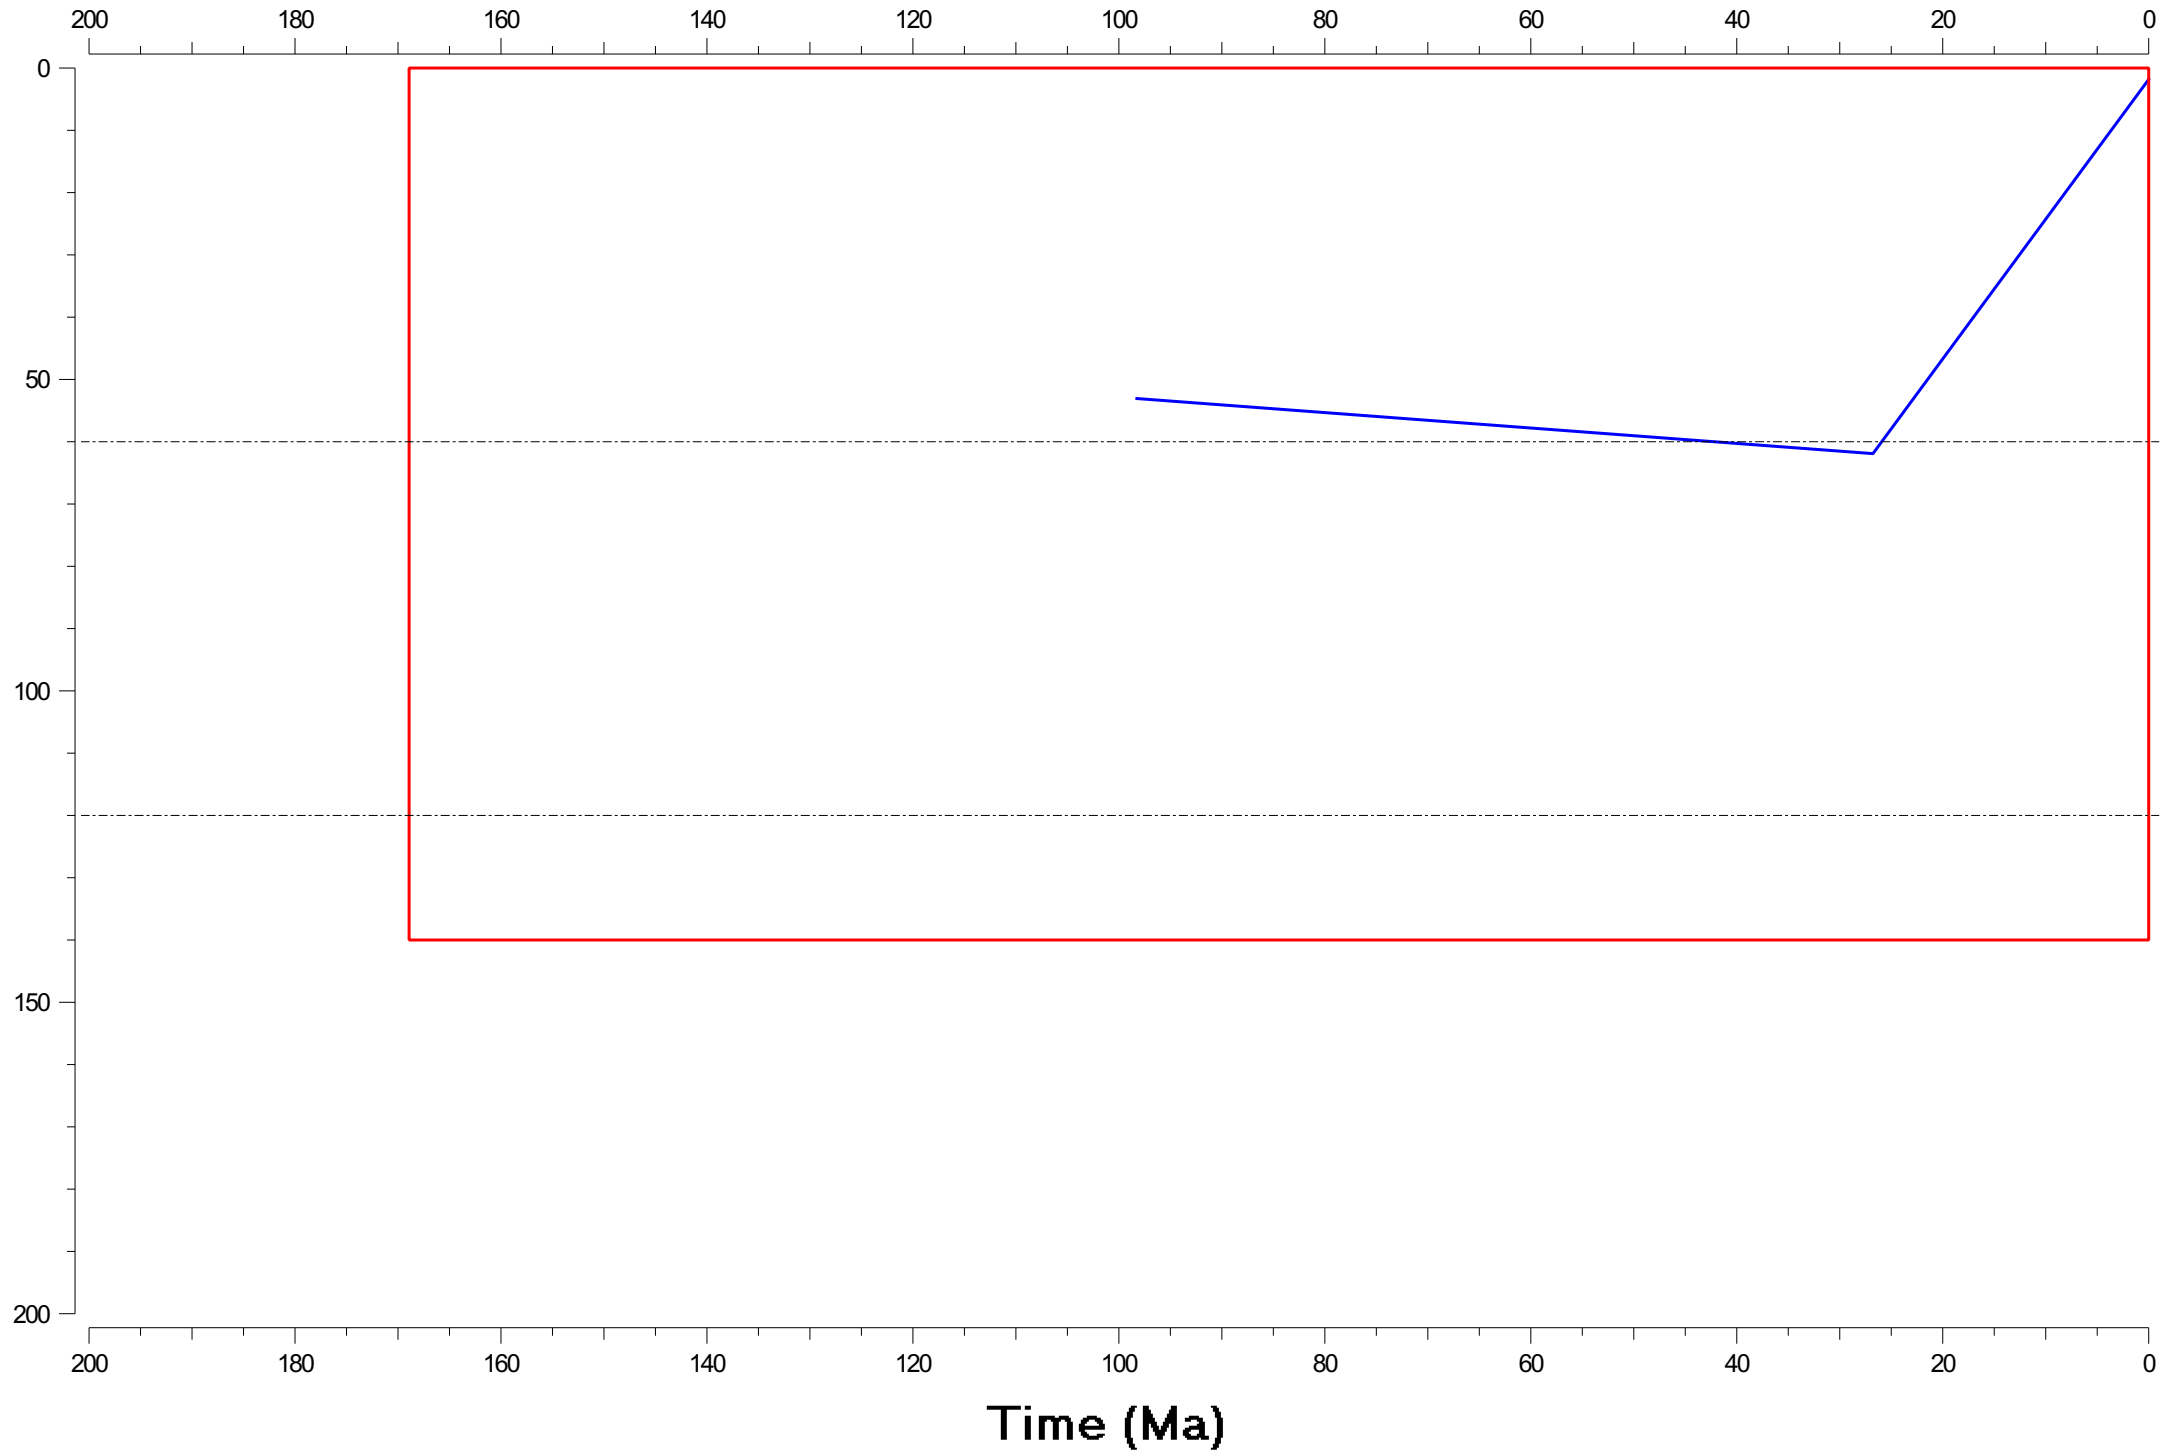

Supplement: Supplementary file 44 [file 1]

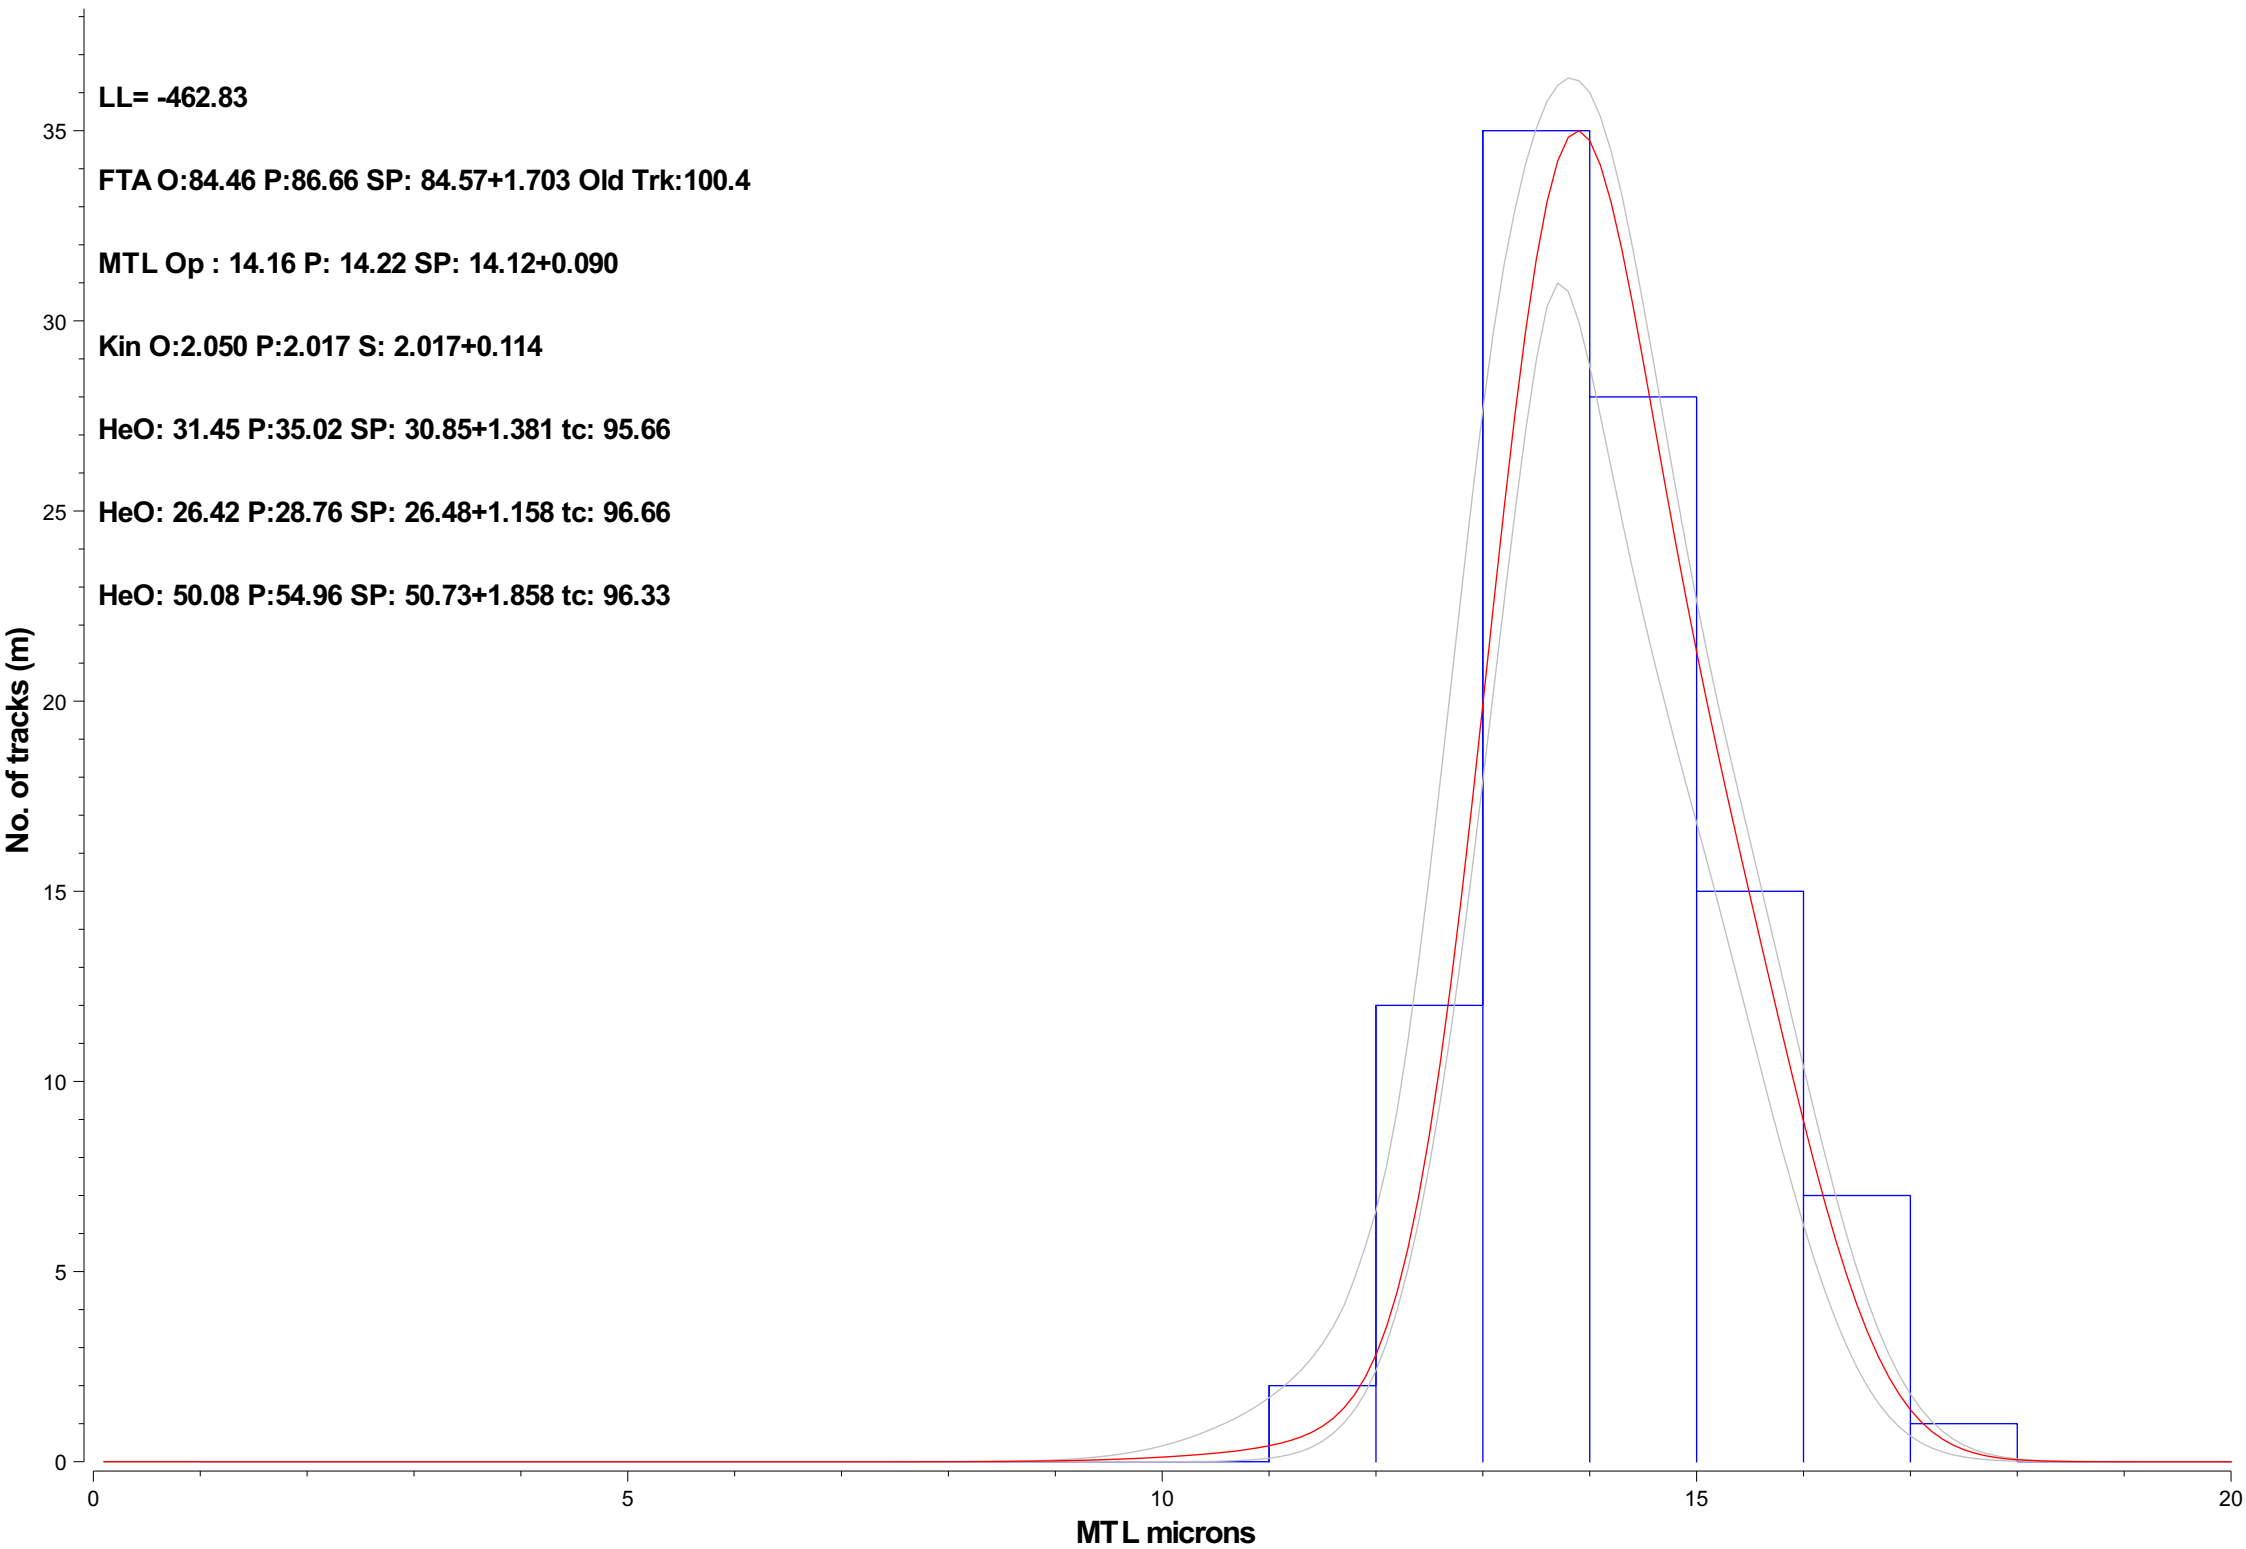

Supplement: Supplementary file 45 [file 1]

# Exercise4\_InputData\_UThHe\_only\_dataset2\_3 : Max Post Time (Ma)

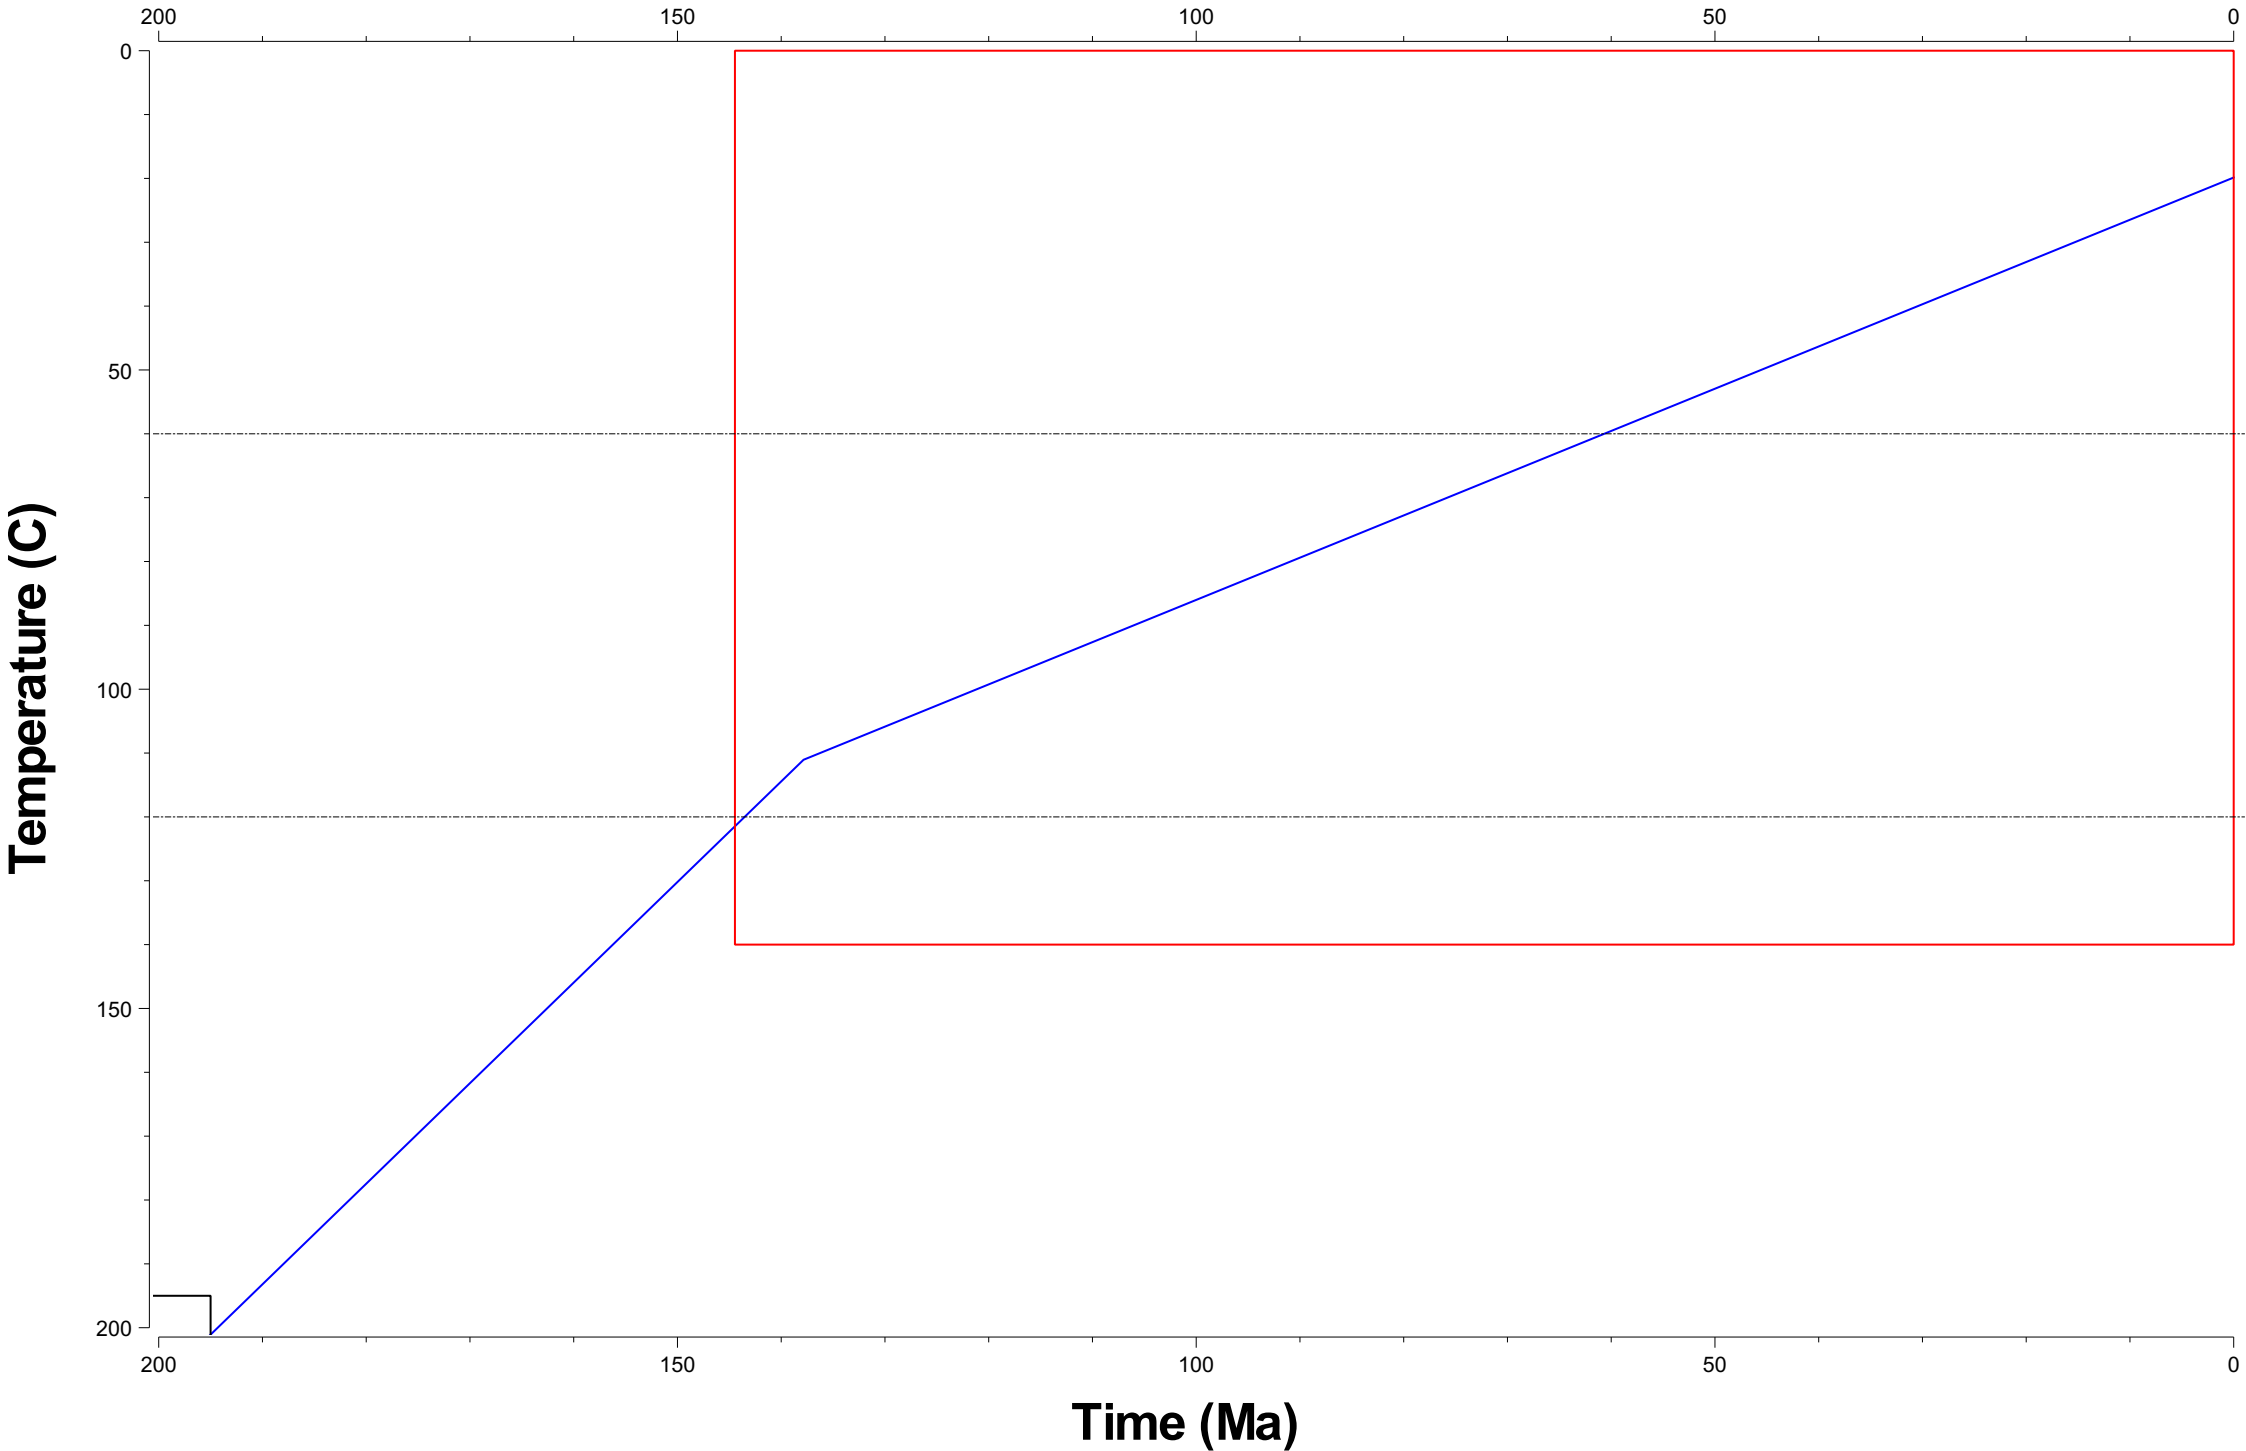

Supplement: Supplementary file 46 [file 1]

Predicted Age (Ma)

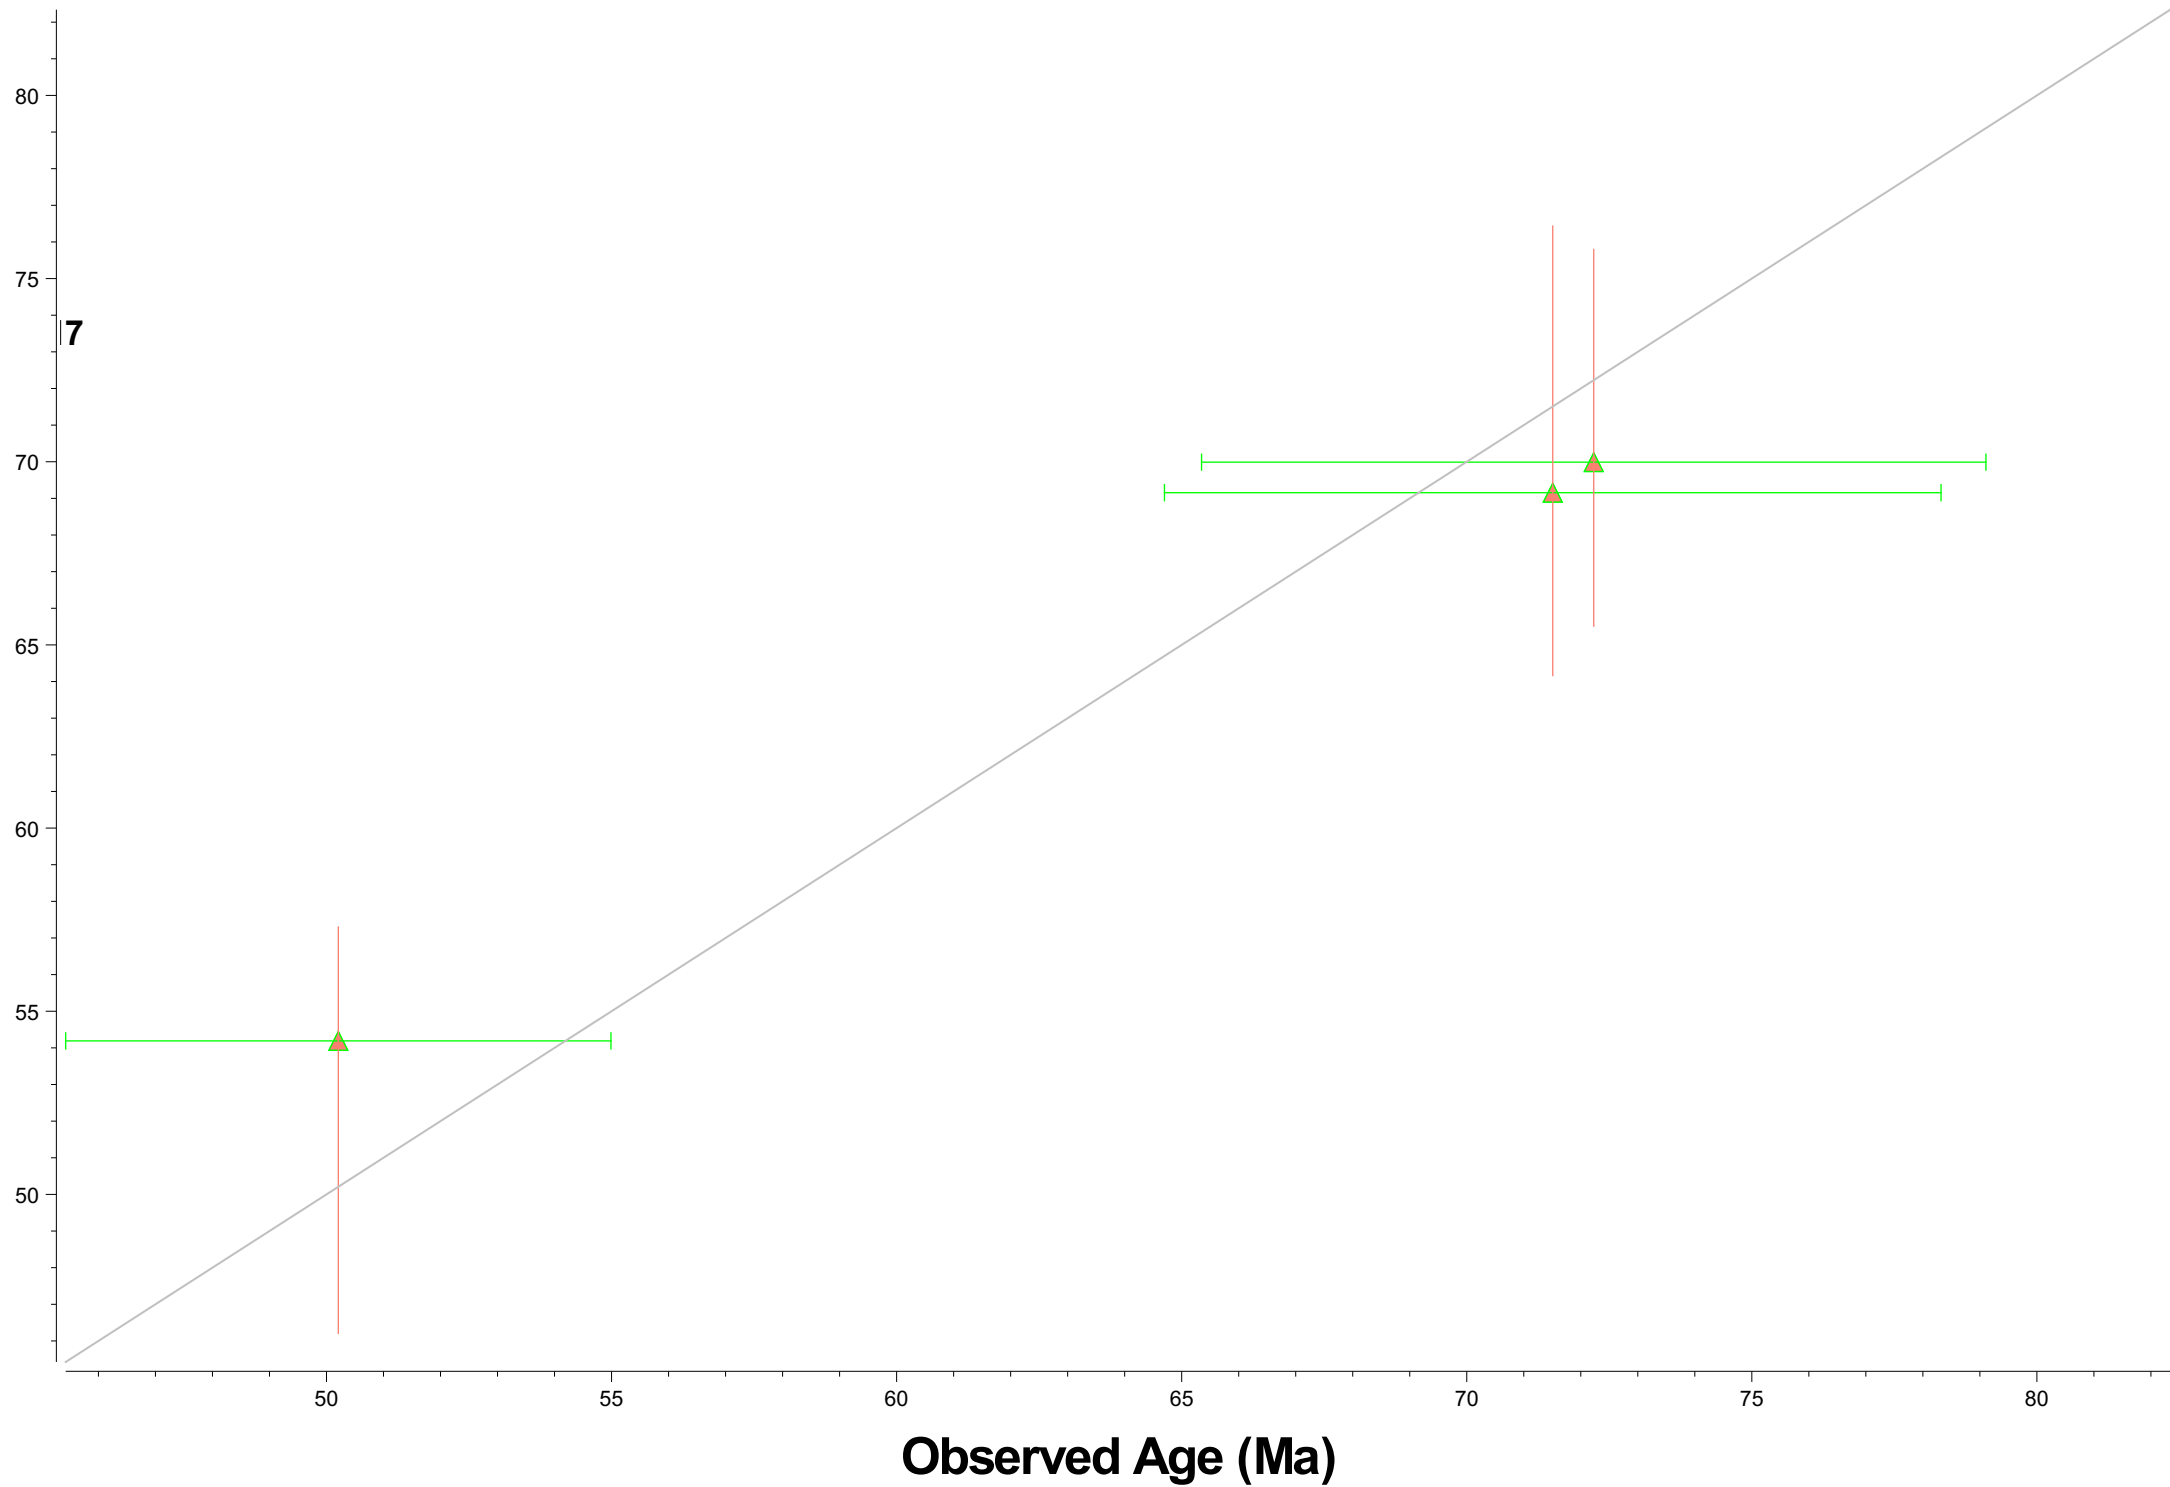

Observed Age (Ma)

▲ AHe Age ■ 10

Supplement: Supplementary file 47 [file 1]

# Exercise4\_GROUPD-1\_3

Log Likelihood

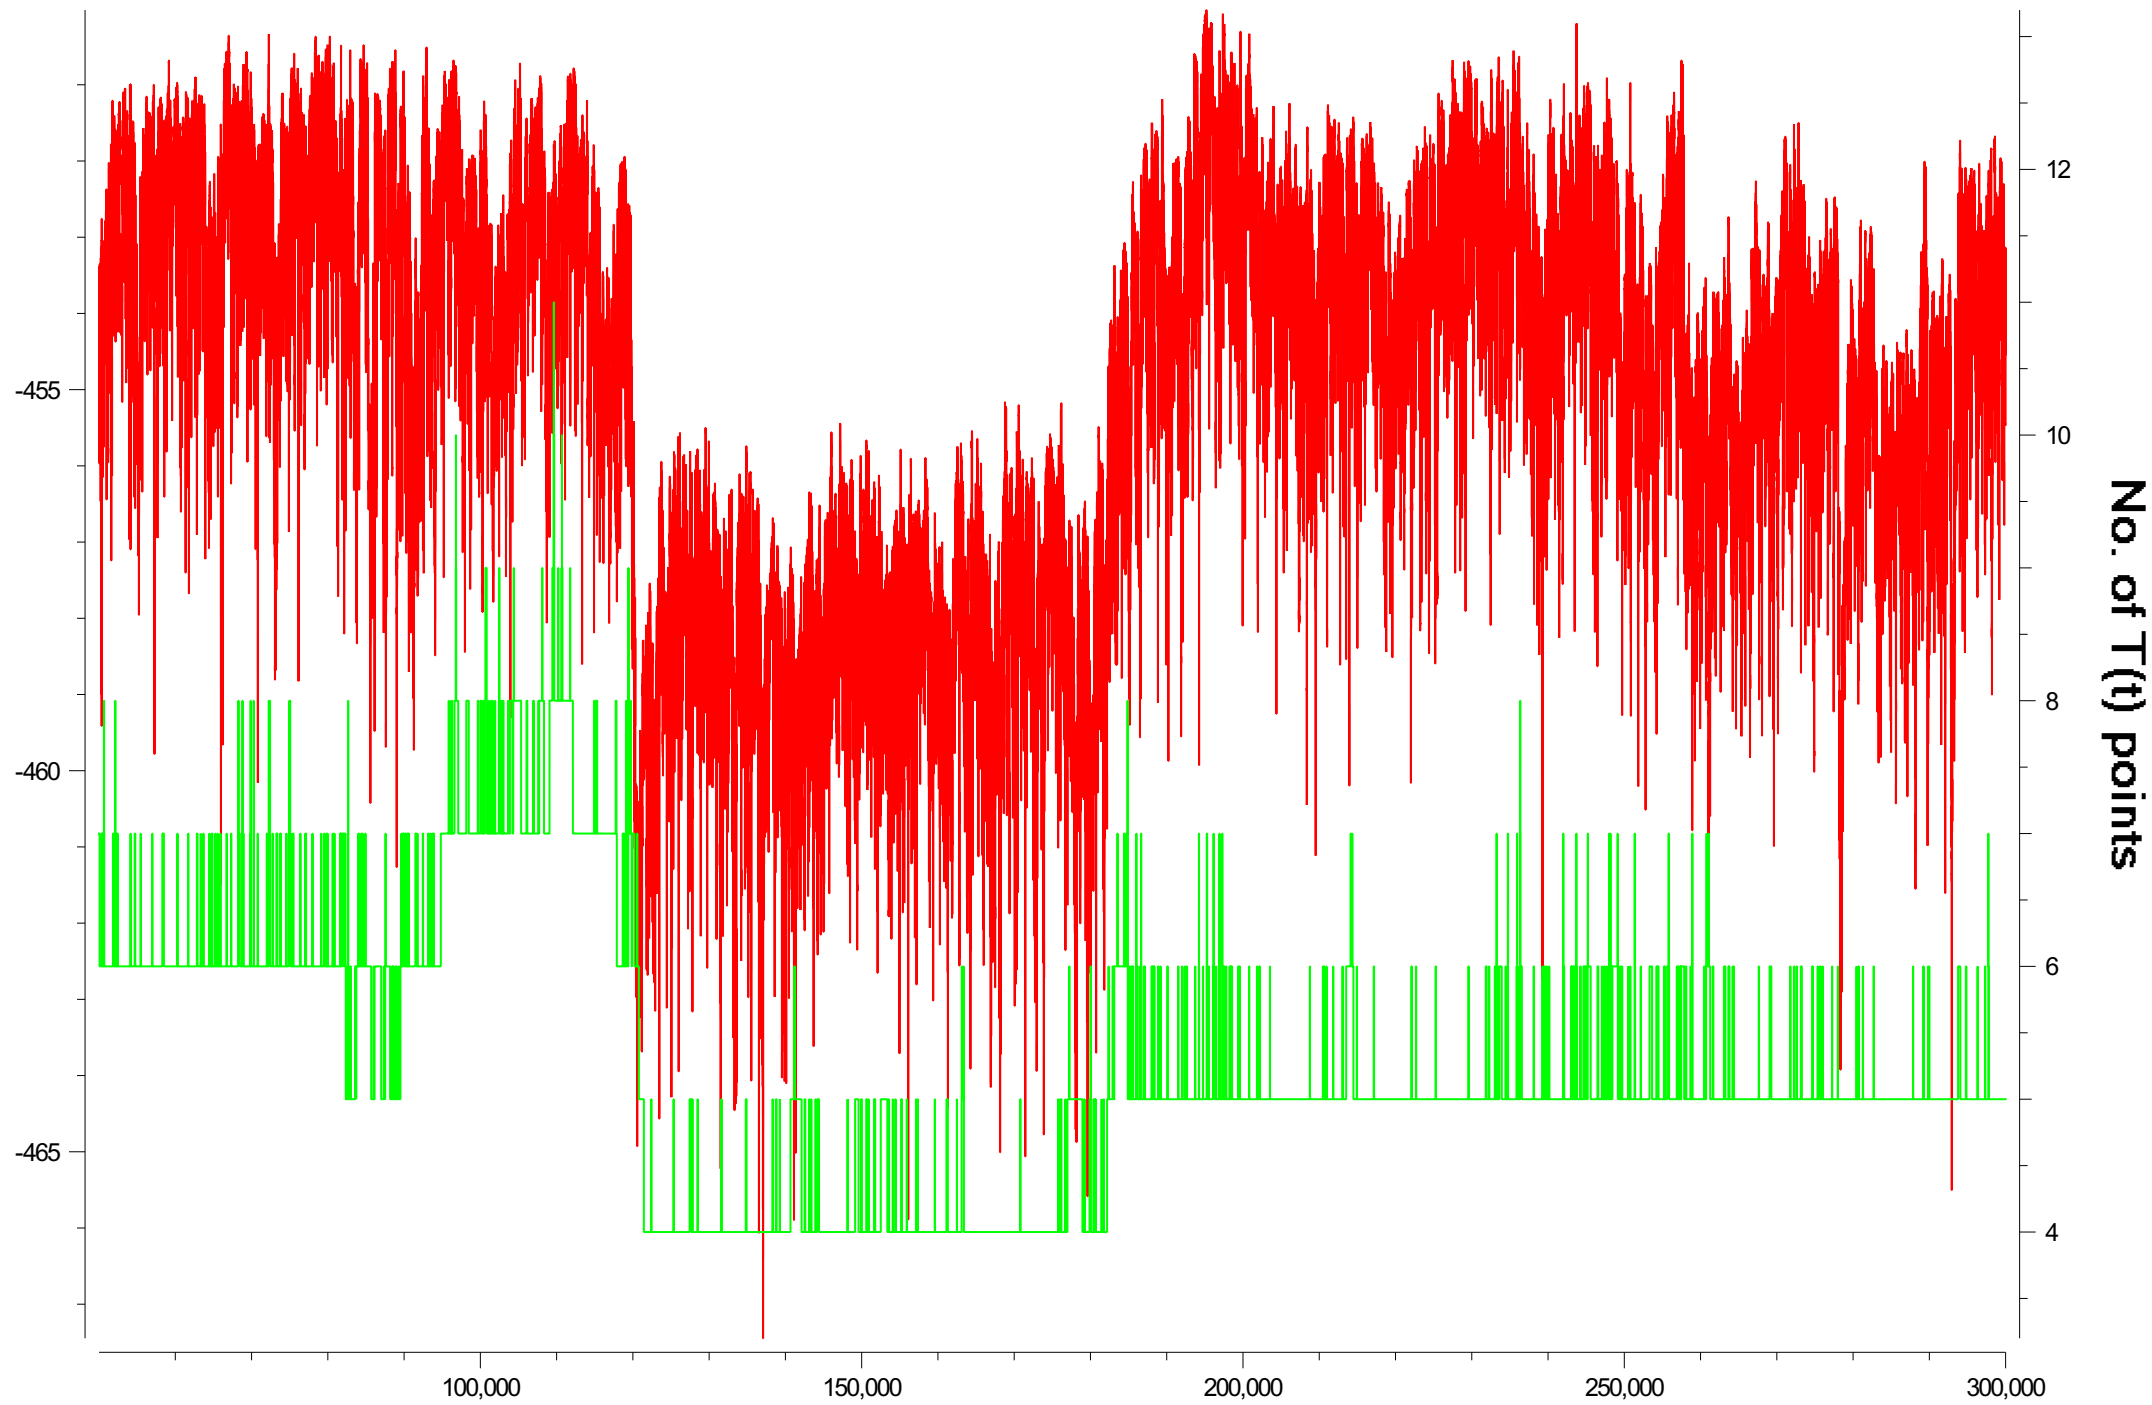

No. of  $T(t)$  points

Iteration

— Likelihood — Nb. of  $T(t)$  points

Supplement: Supplementary file 48 [file 1]

# Exercise3\_IM\_4\_Exercise3\_InputData.txt

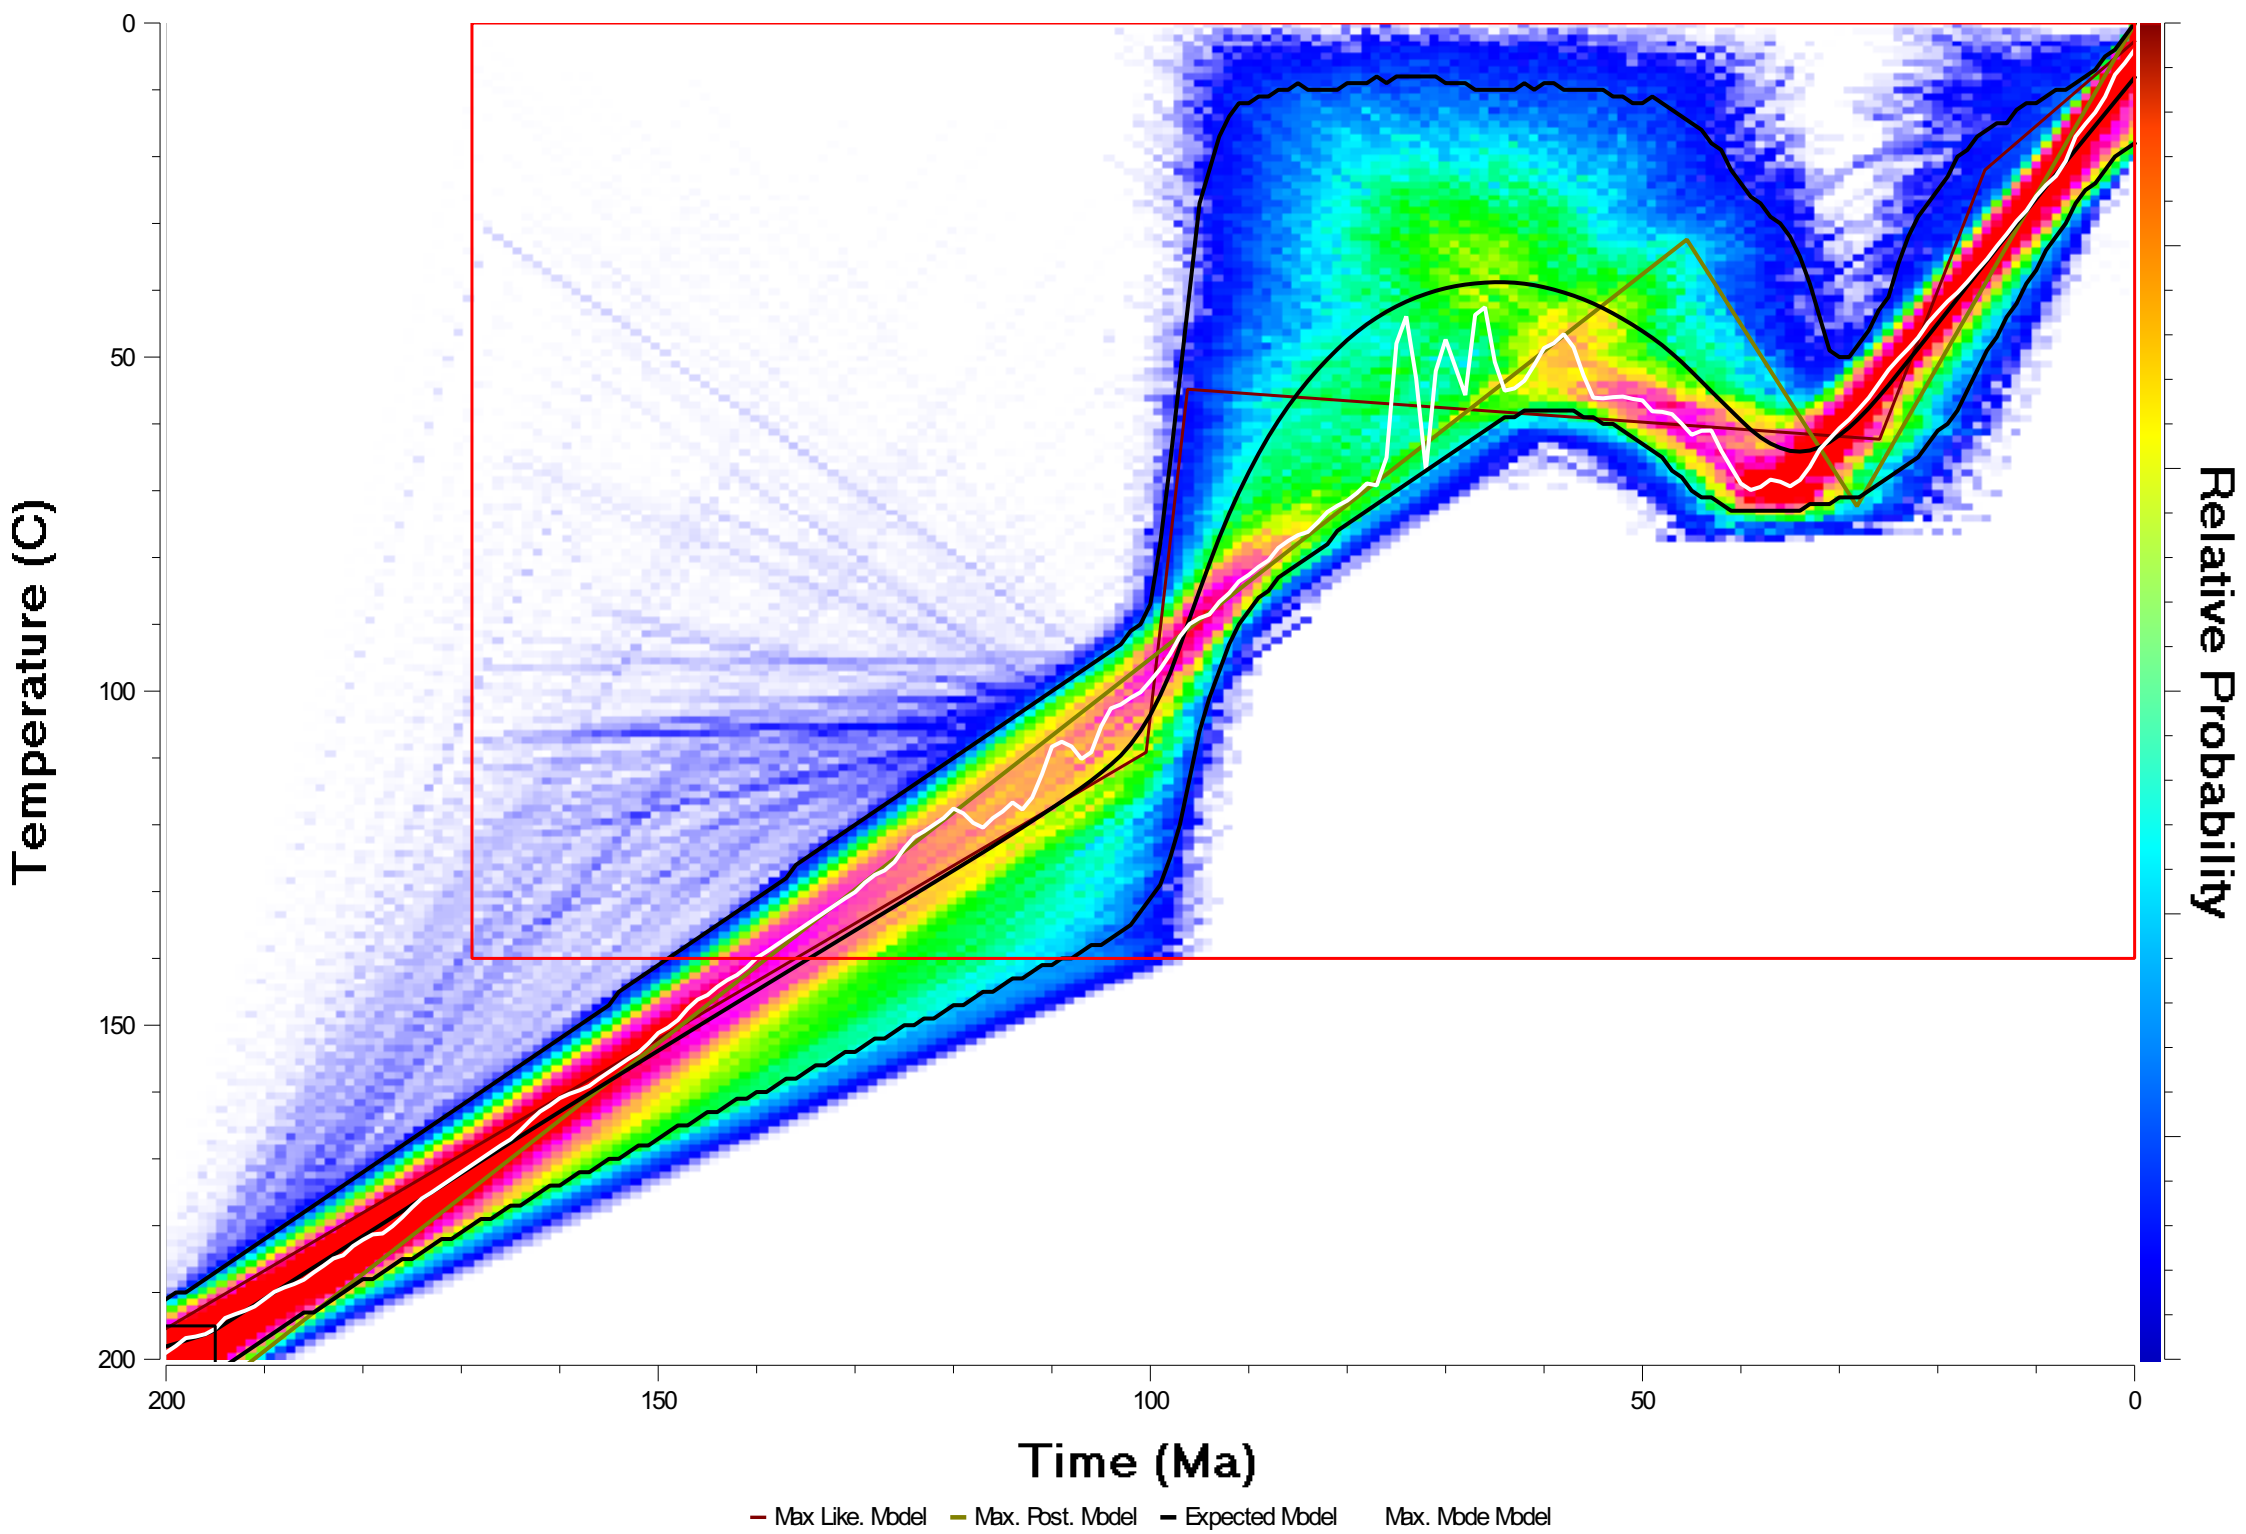

Supplement: Supplementary file 49 [file 1]

# Exercise4\_GROUPC-1\_3 : Max Like

## Time (Ma)

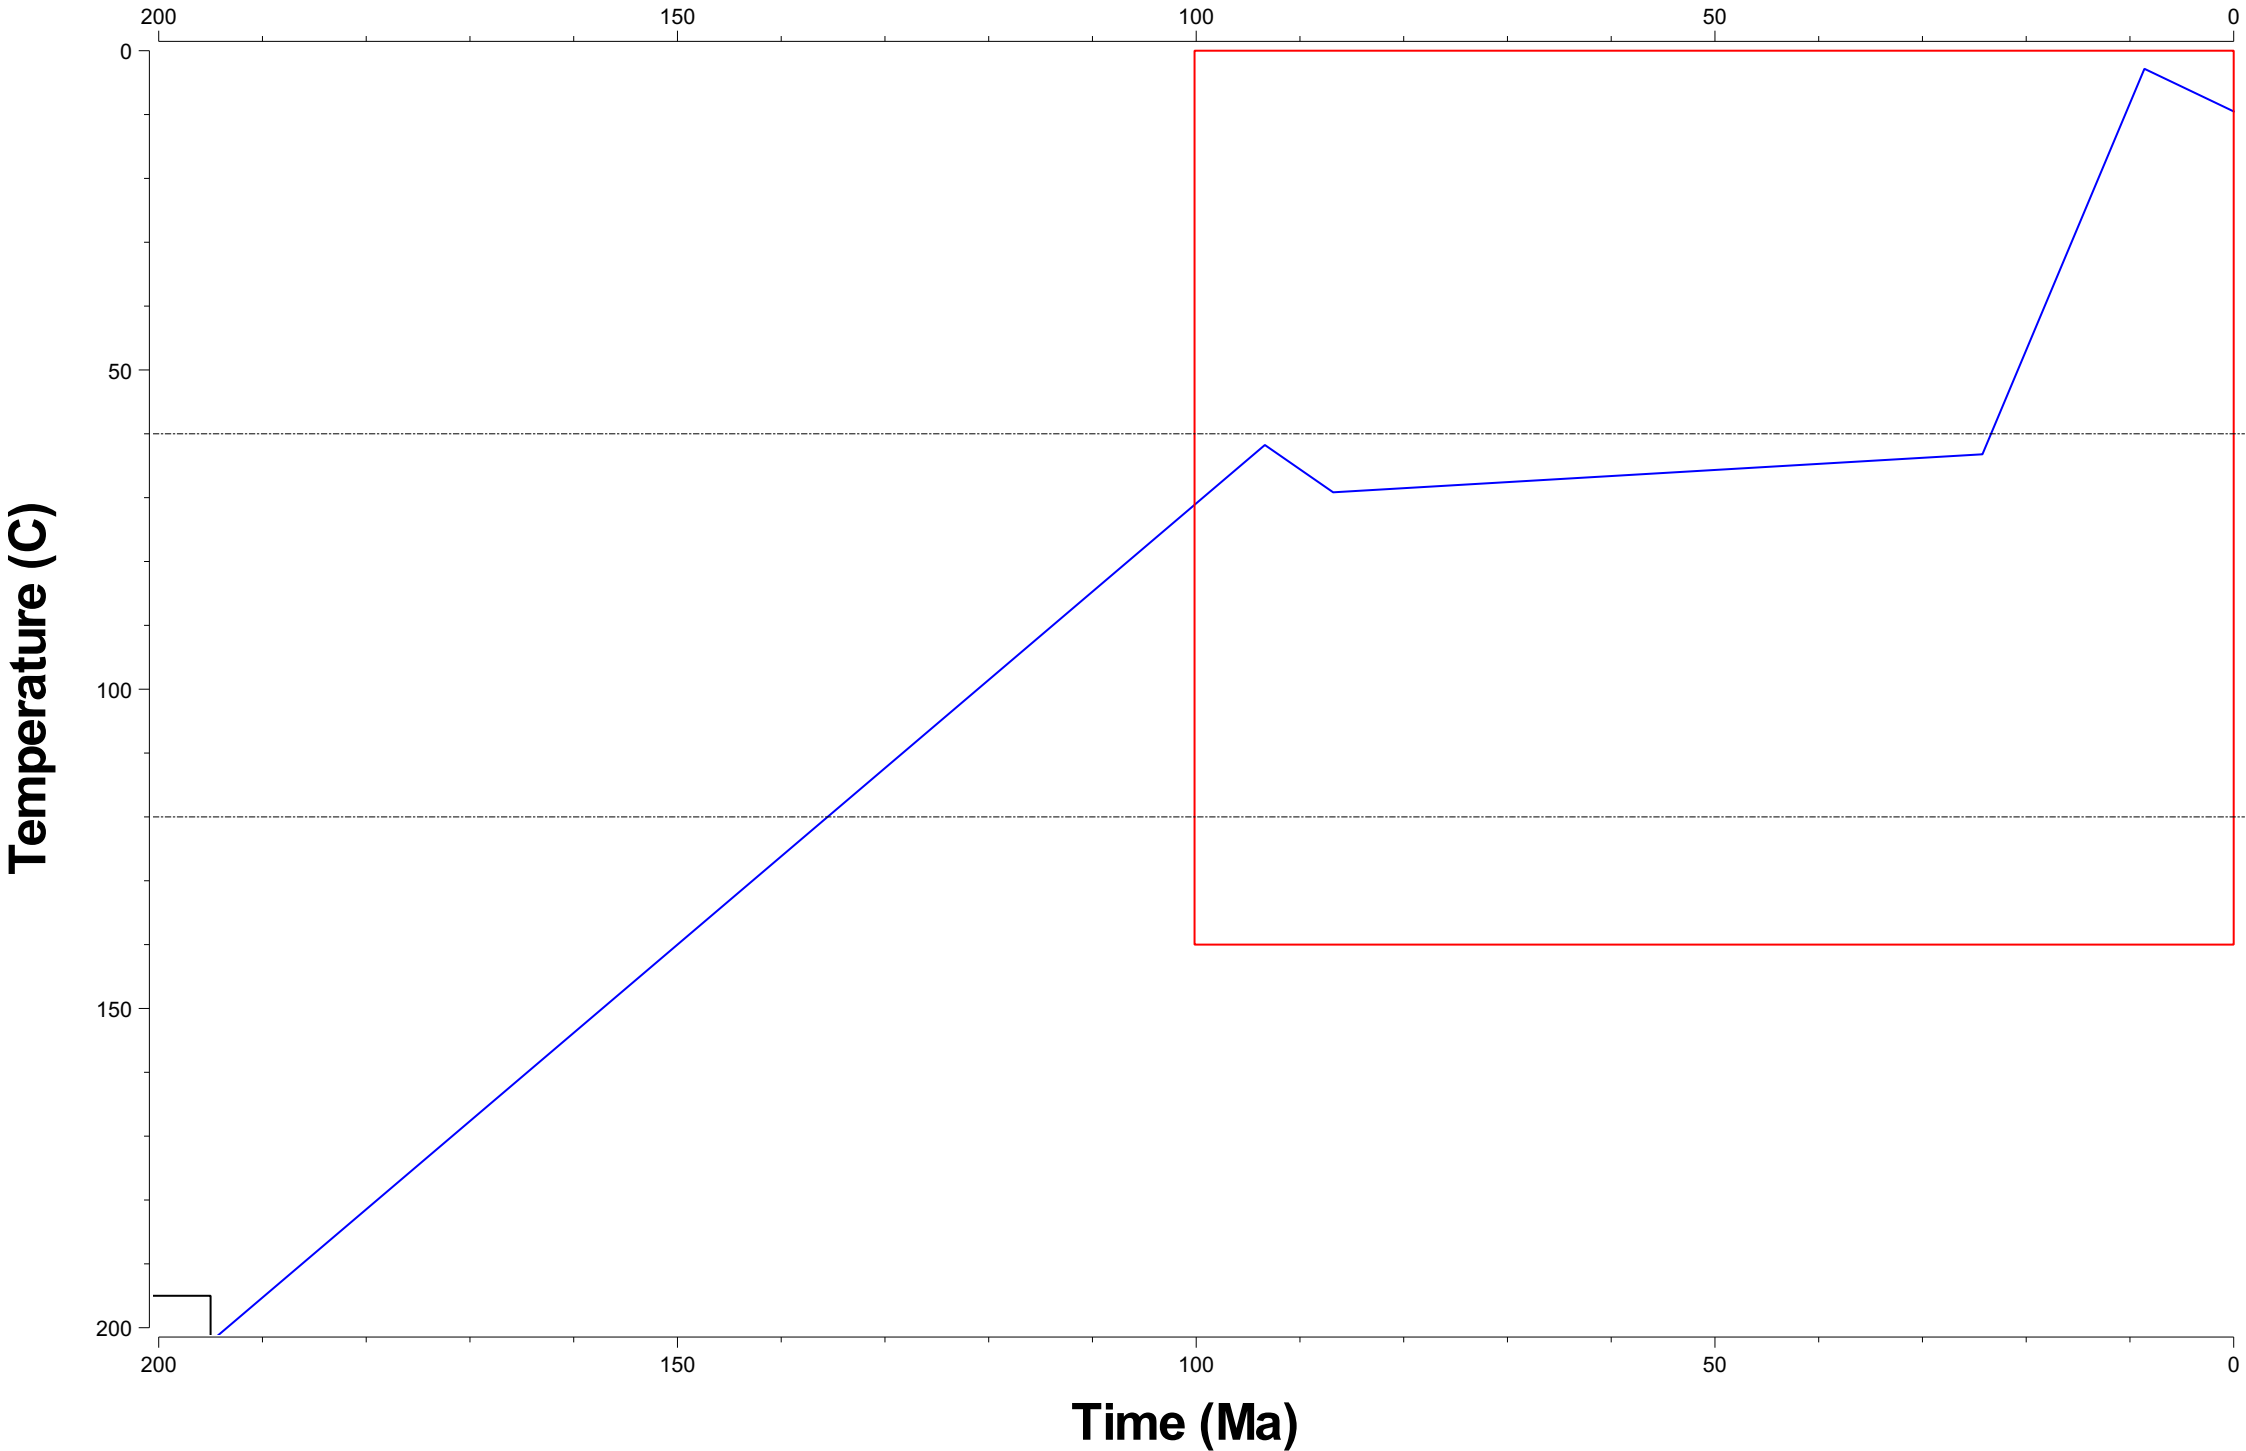

Supplement: Supplementary file 50 [file 1]

# Exercise3\_IM\_4\_Exercise3\_InputData.txt : Max Posterior

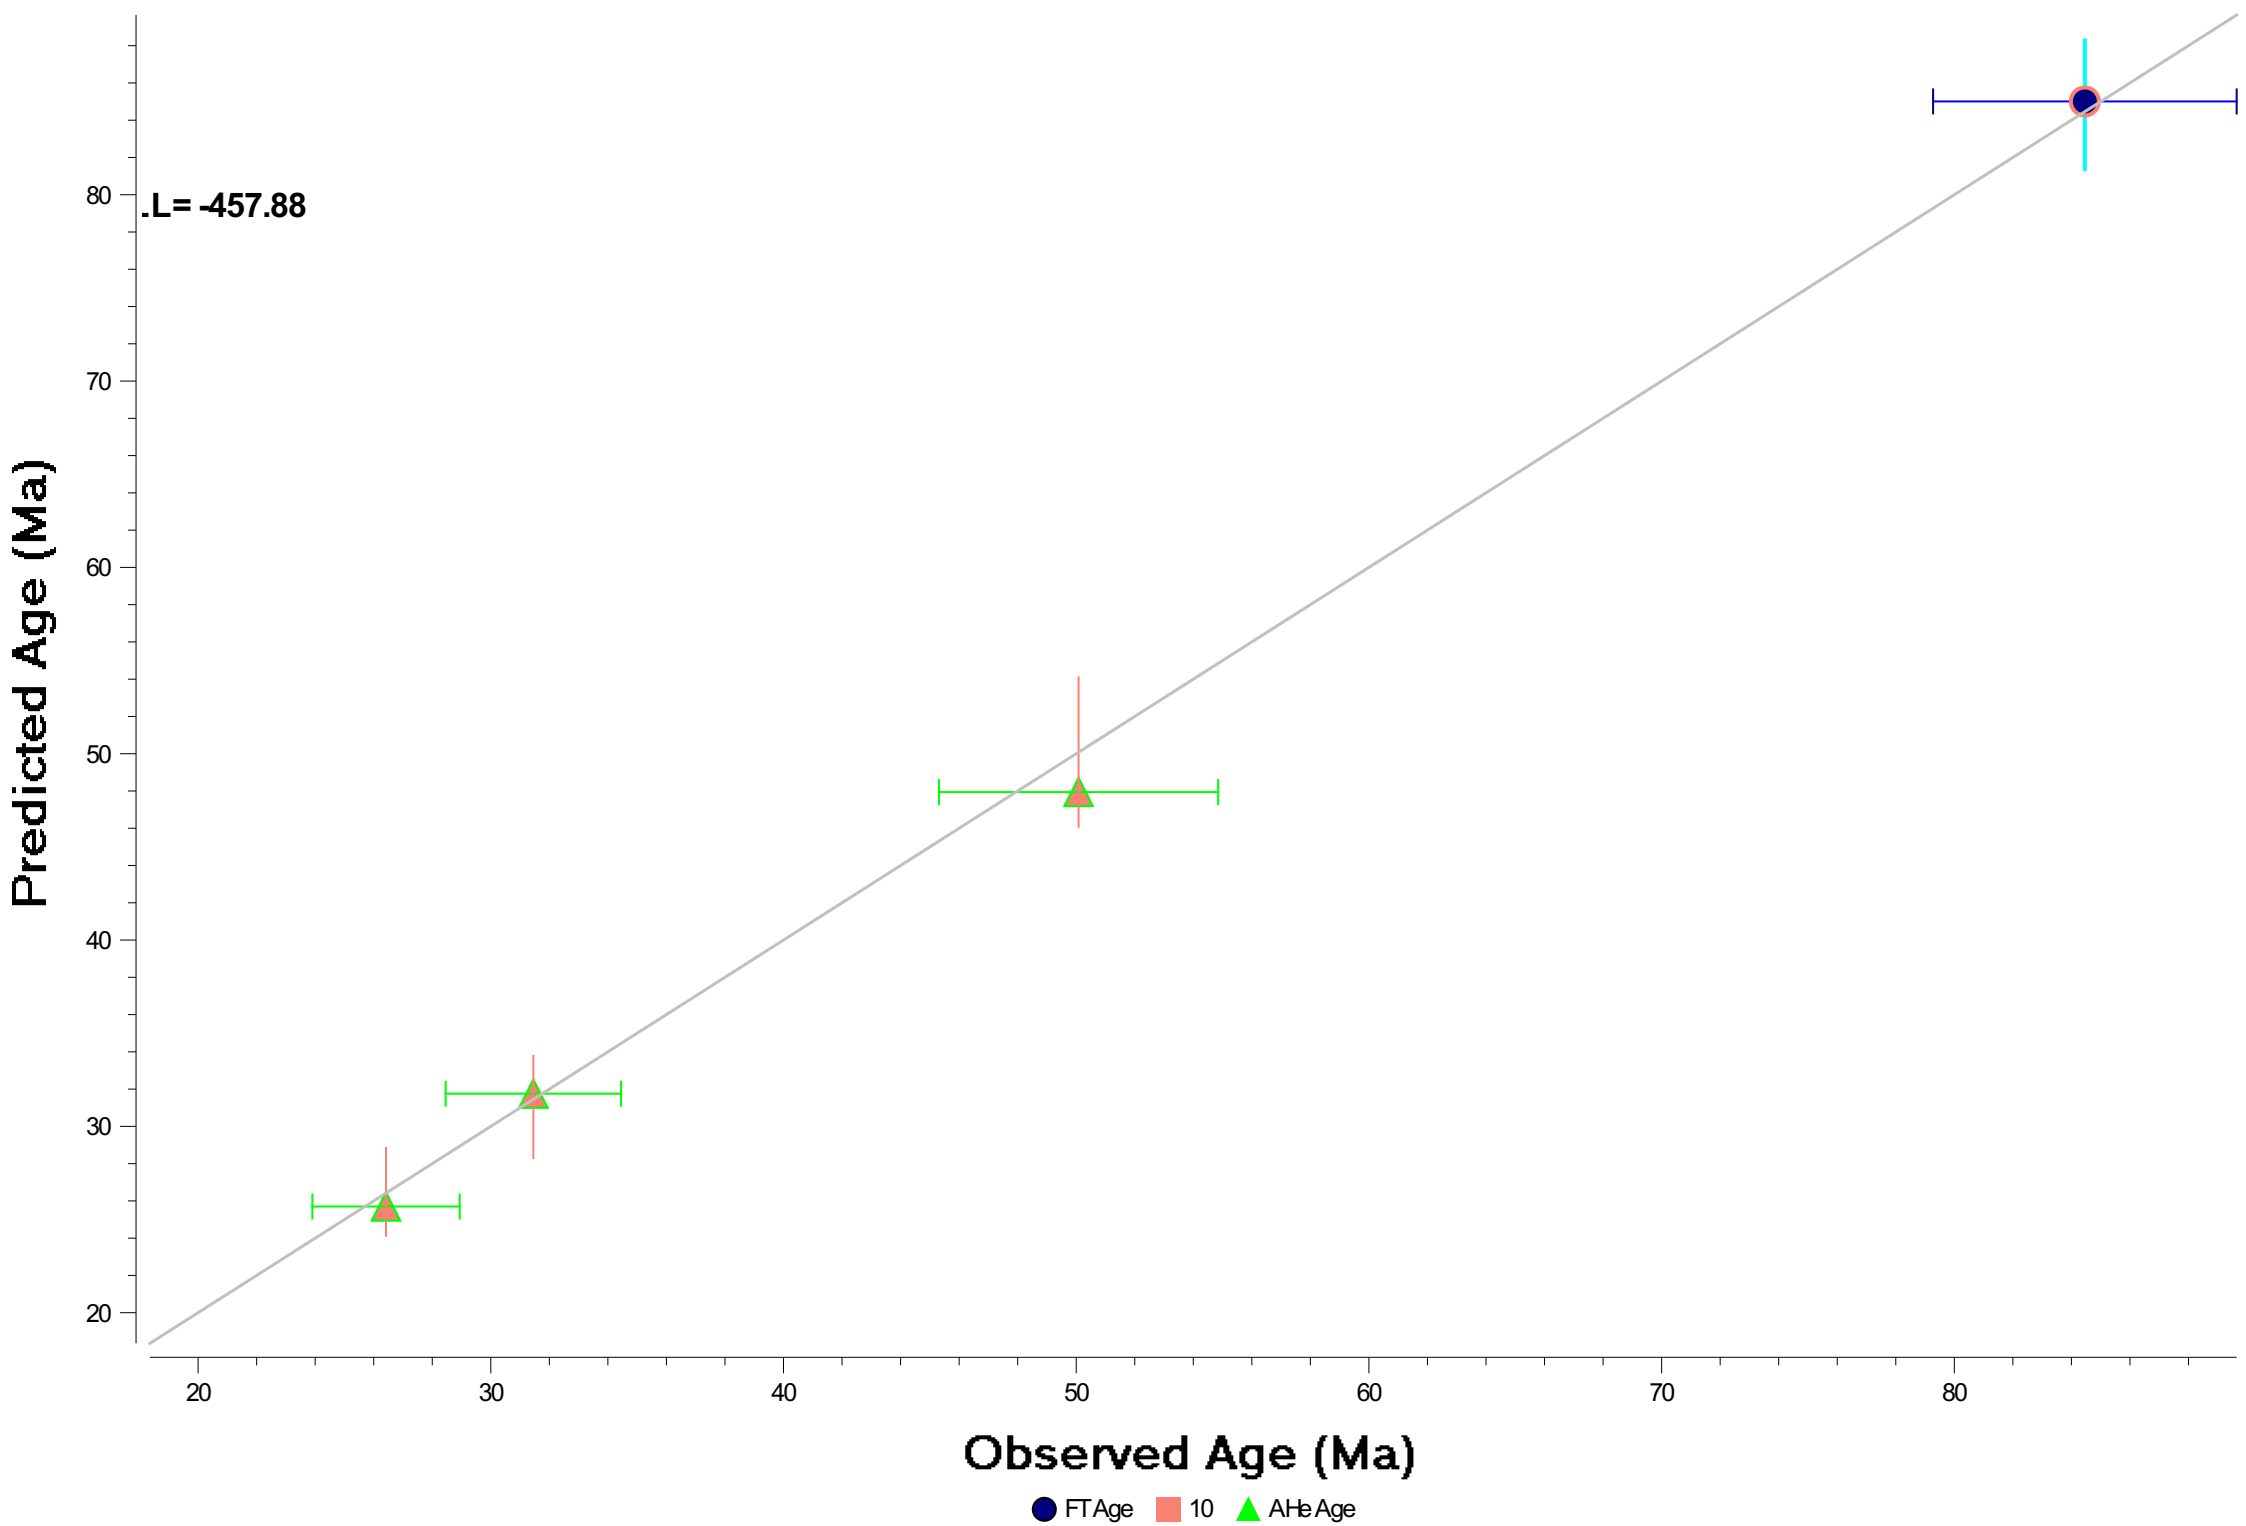

Supplement: Supplementary file 51 [file 1]

# Exercise4\_GROUPD-1\_3 : EXPECTED

Time (Ma)

Temperature (C)

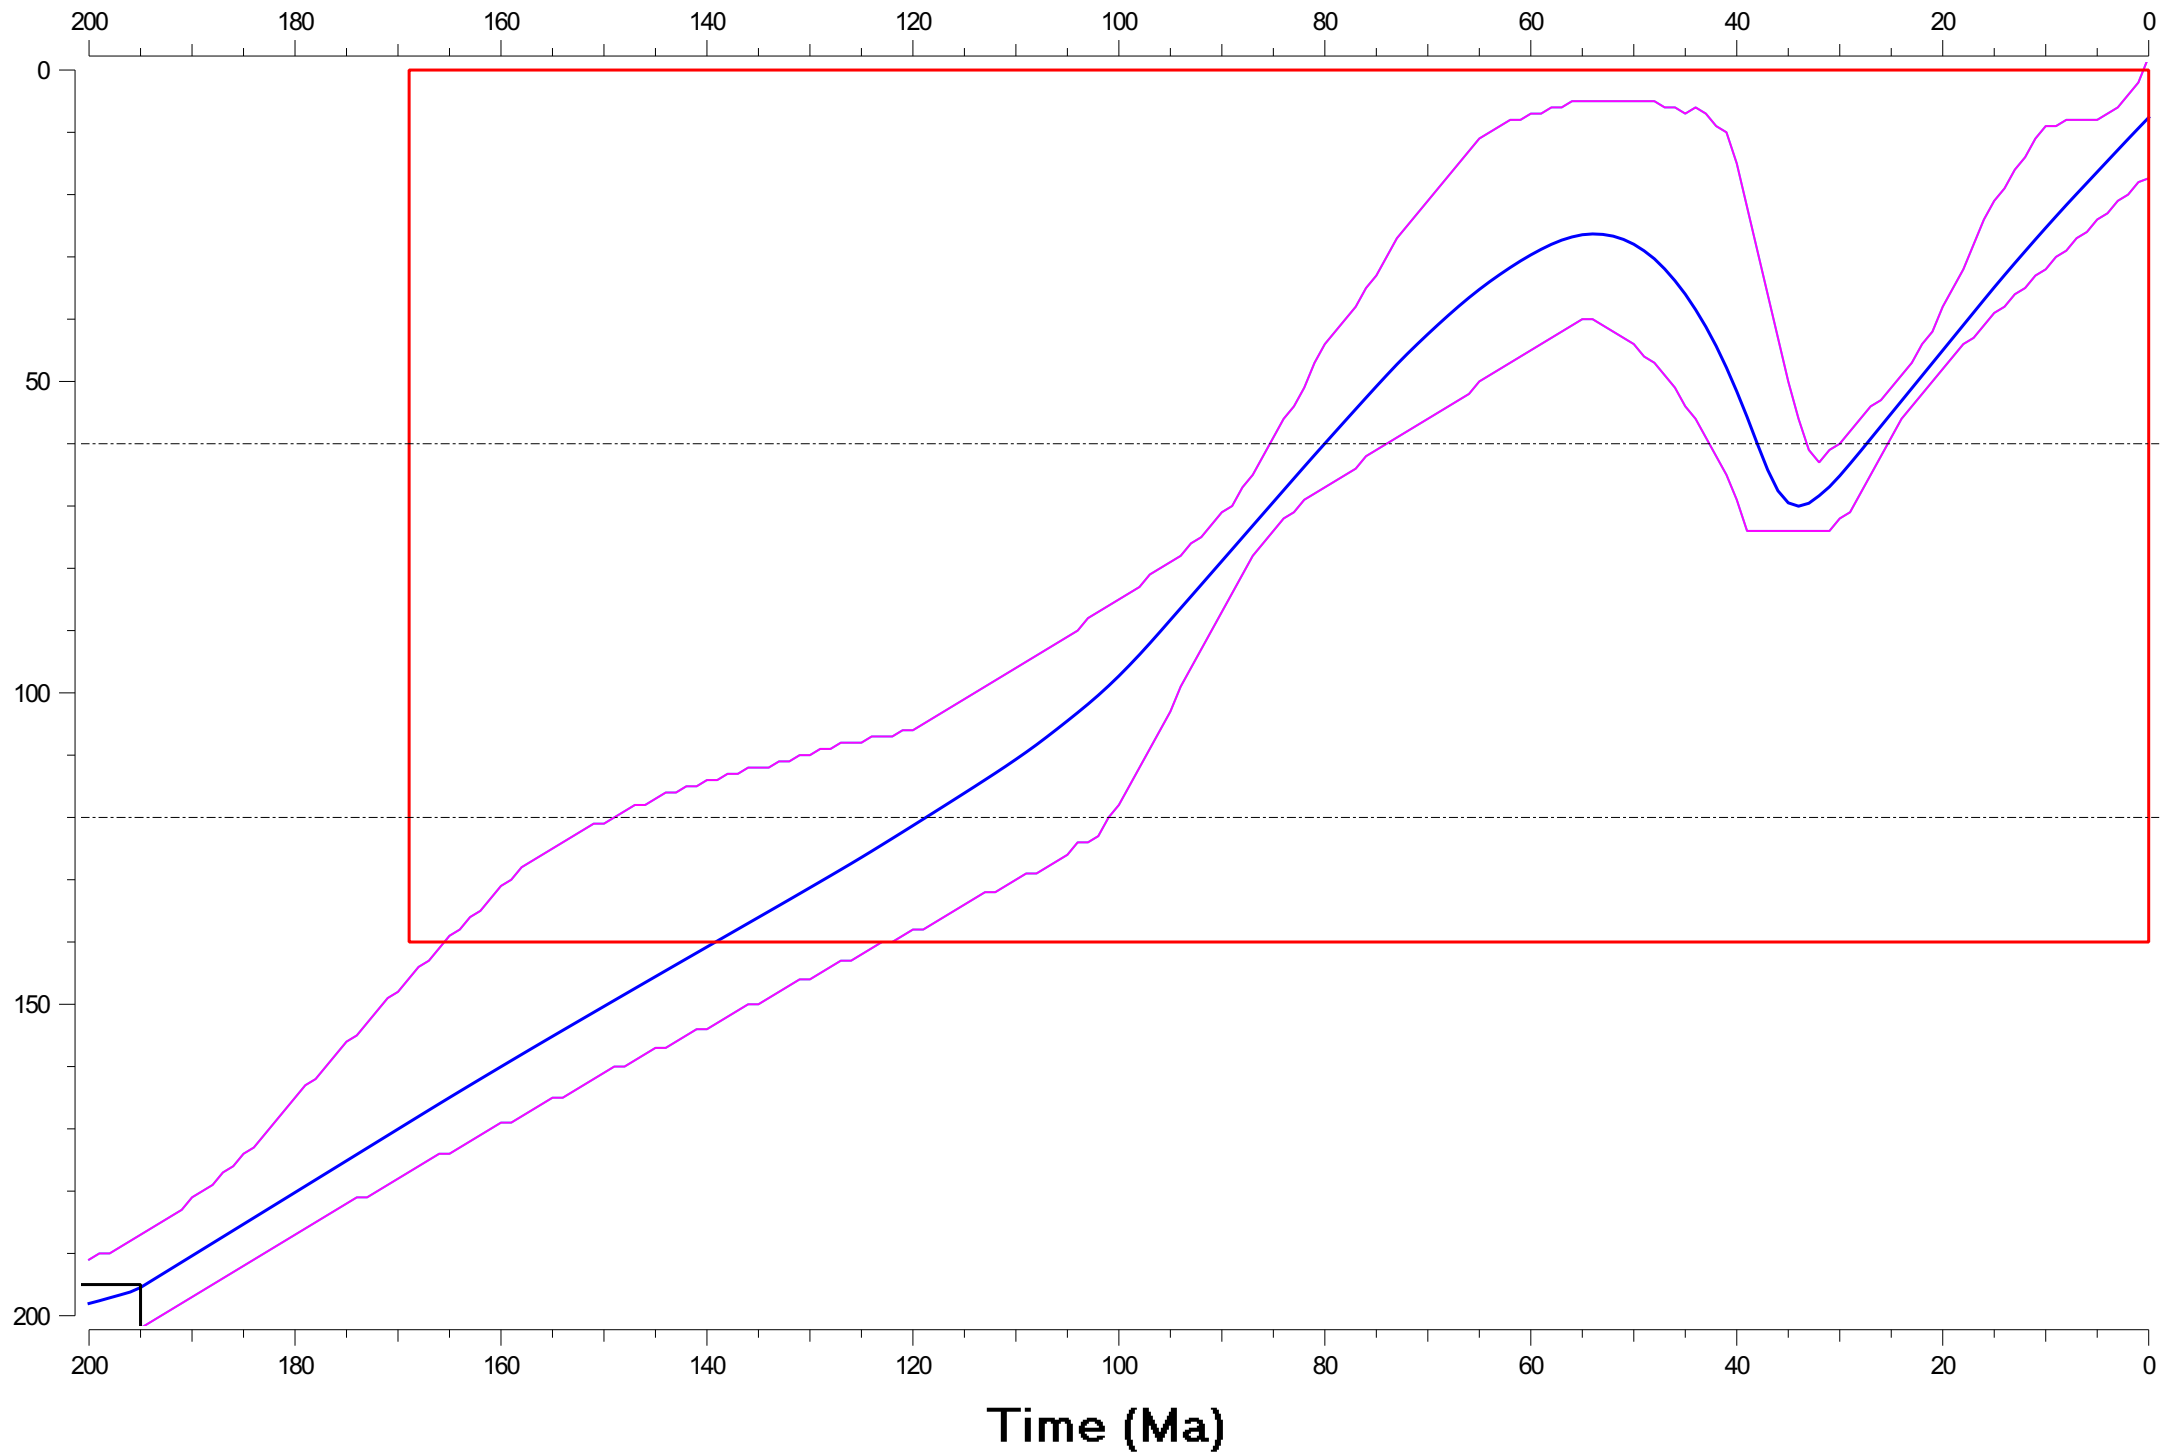

Supplement: Supplementary file 52 [file 1]

# Exercise4\_GROUPD-1\_3\_Exercise4\_InputData.txt 10.00m : Max Post

No. of tracks (m)

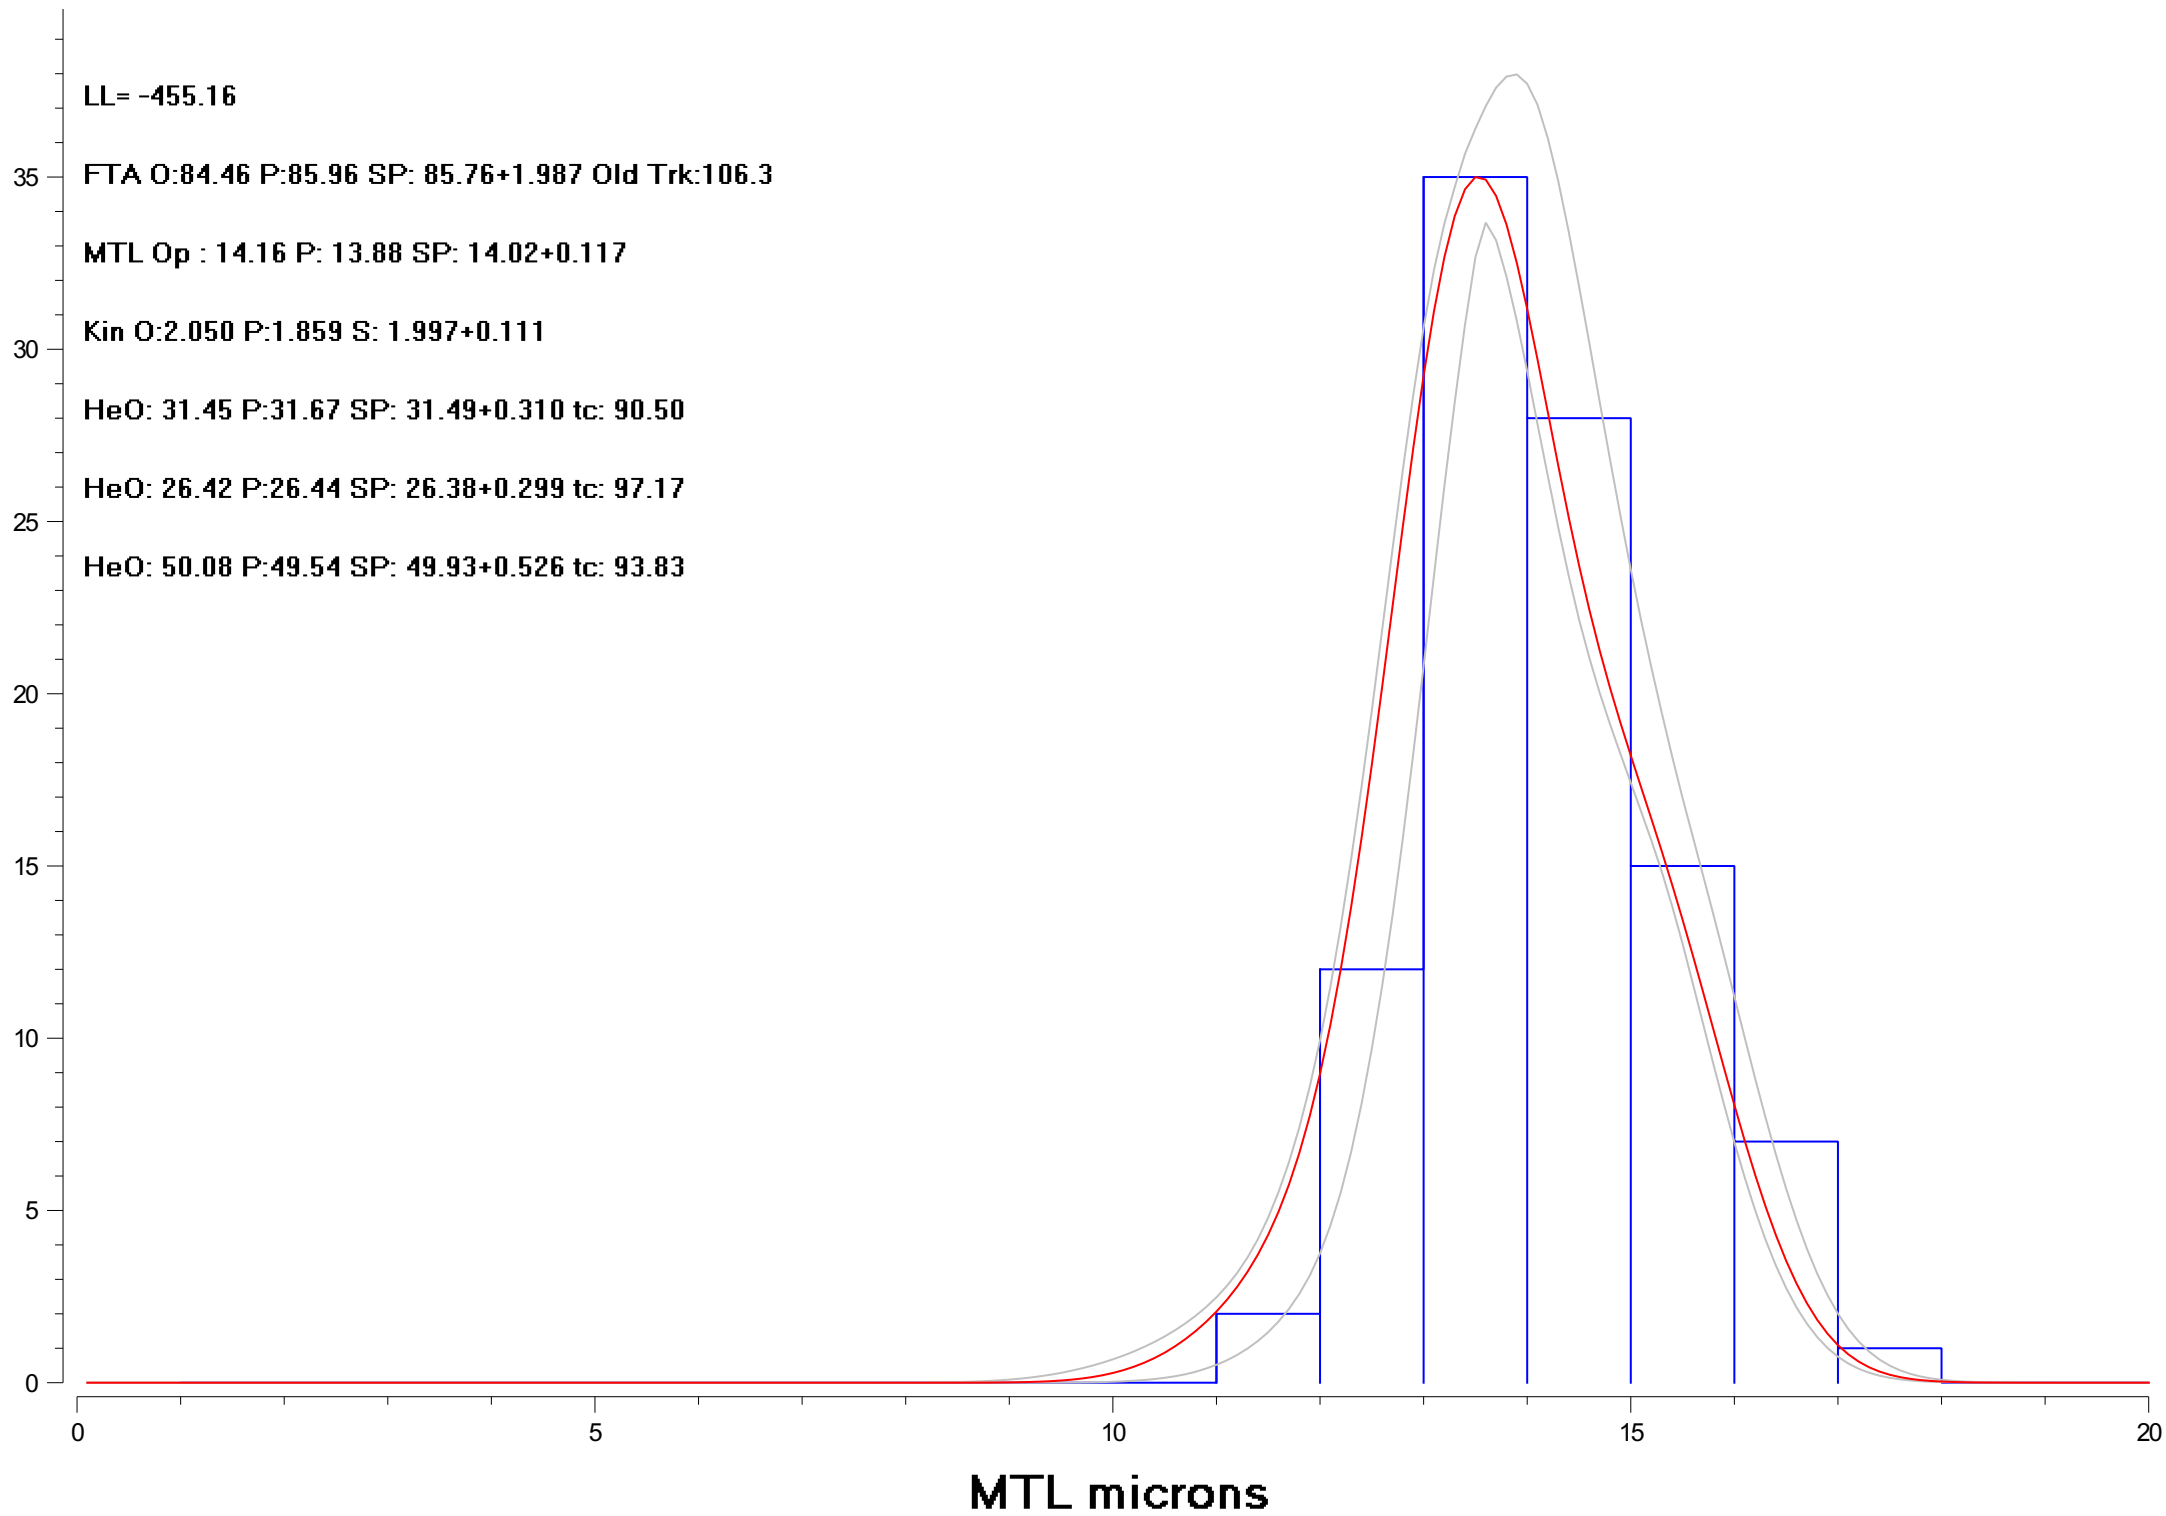

Supplement: Supplementary file 54 [file 1]

# Exercise4\_GROUPA-1\_3\_Exercise4\_InputData.txt 10.00m : Max. Like

No. of tracks (m)

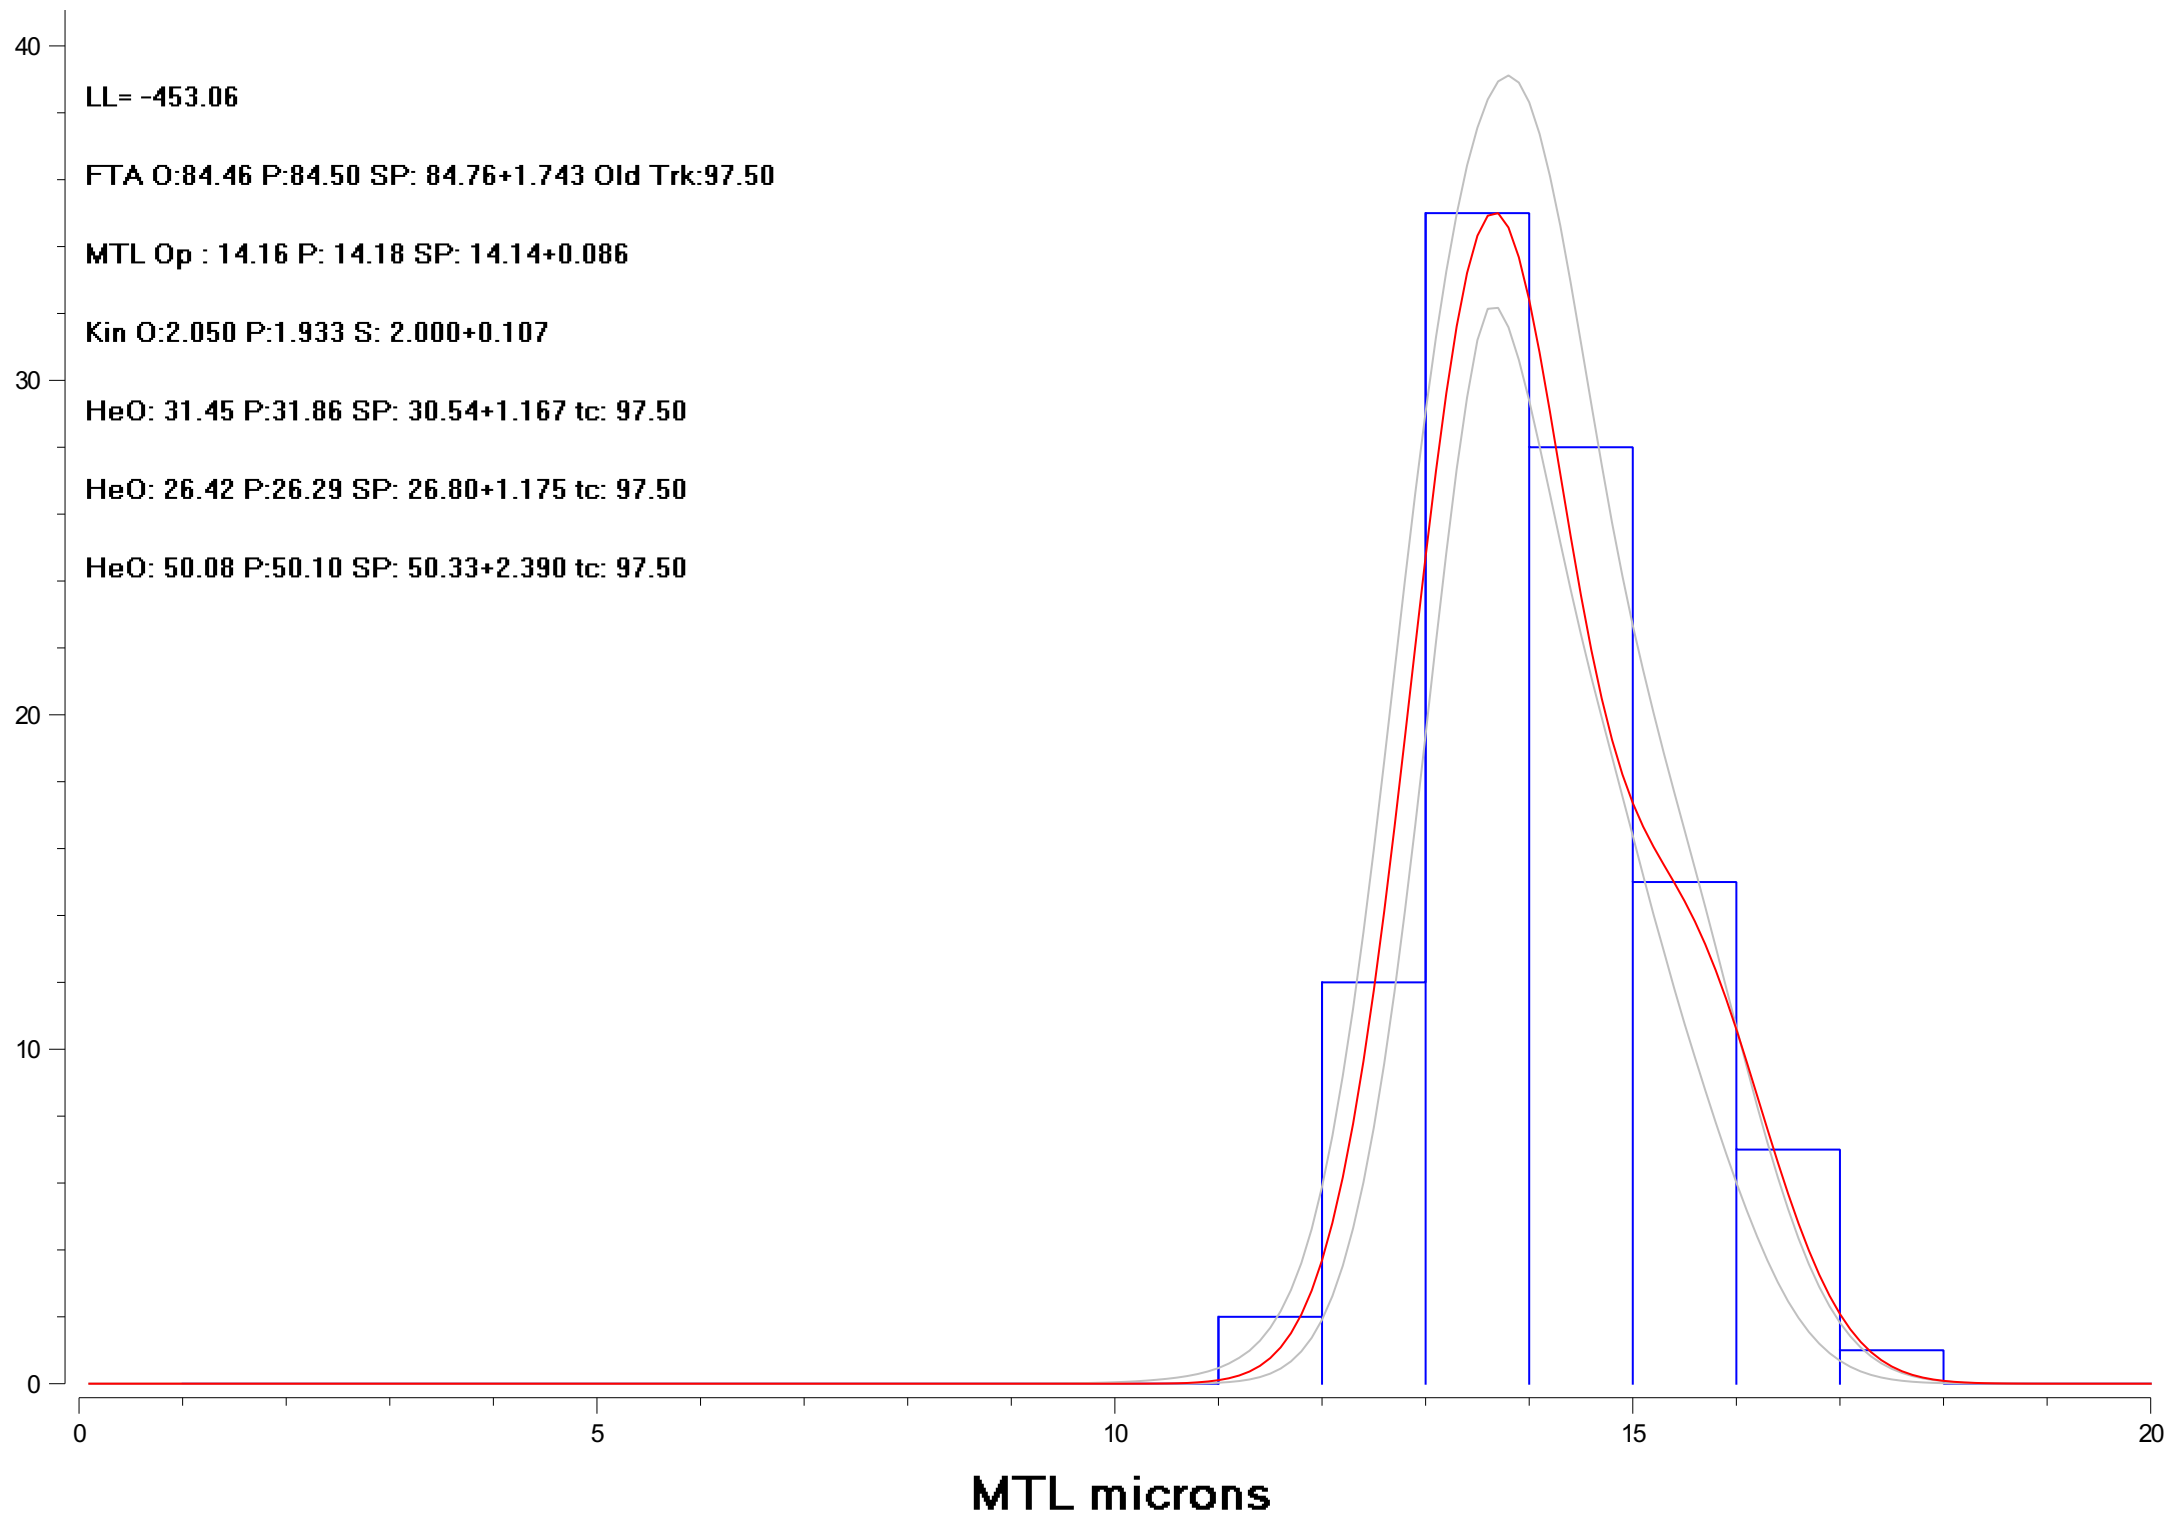

Supplement: Supplementary file 55 [file 1]

# QTQt Single Thermal History

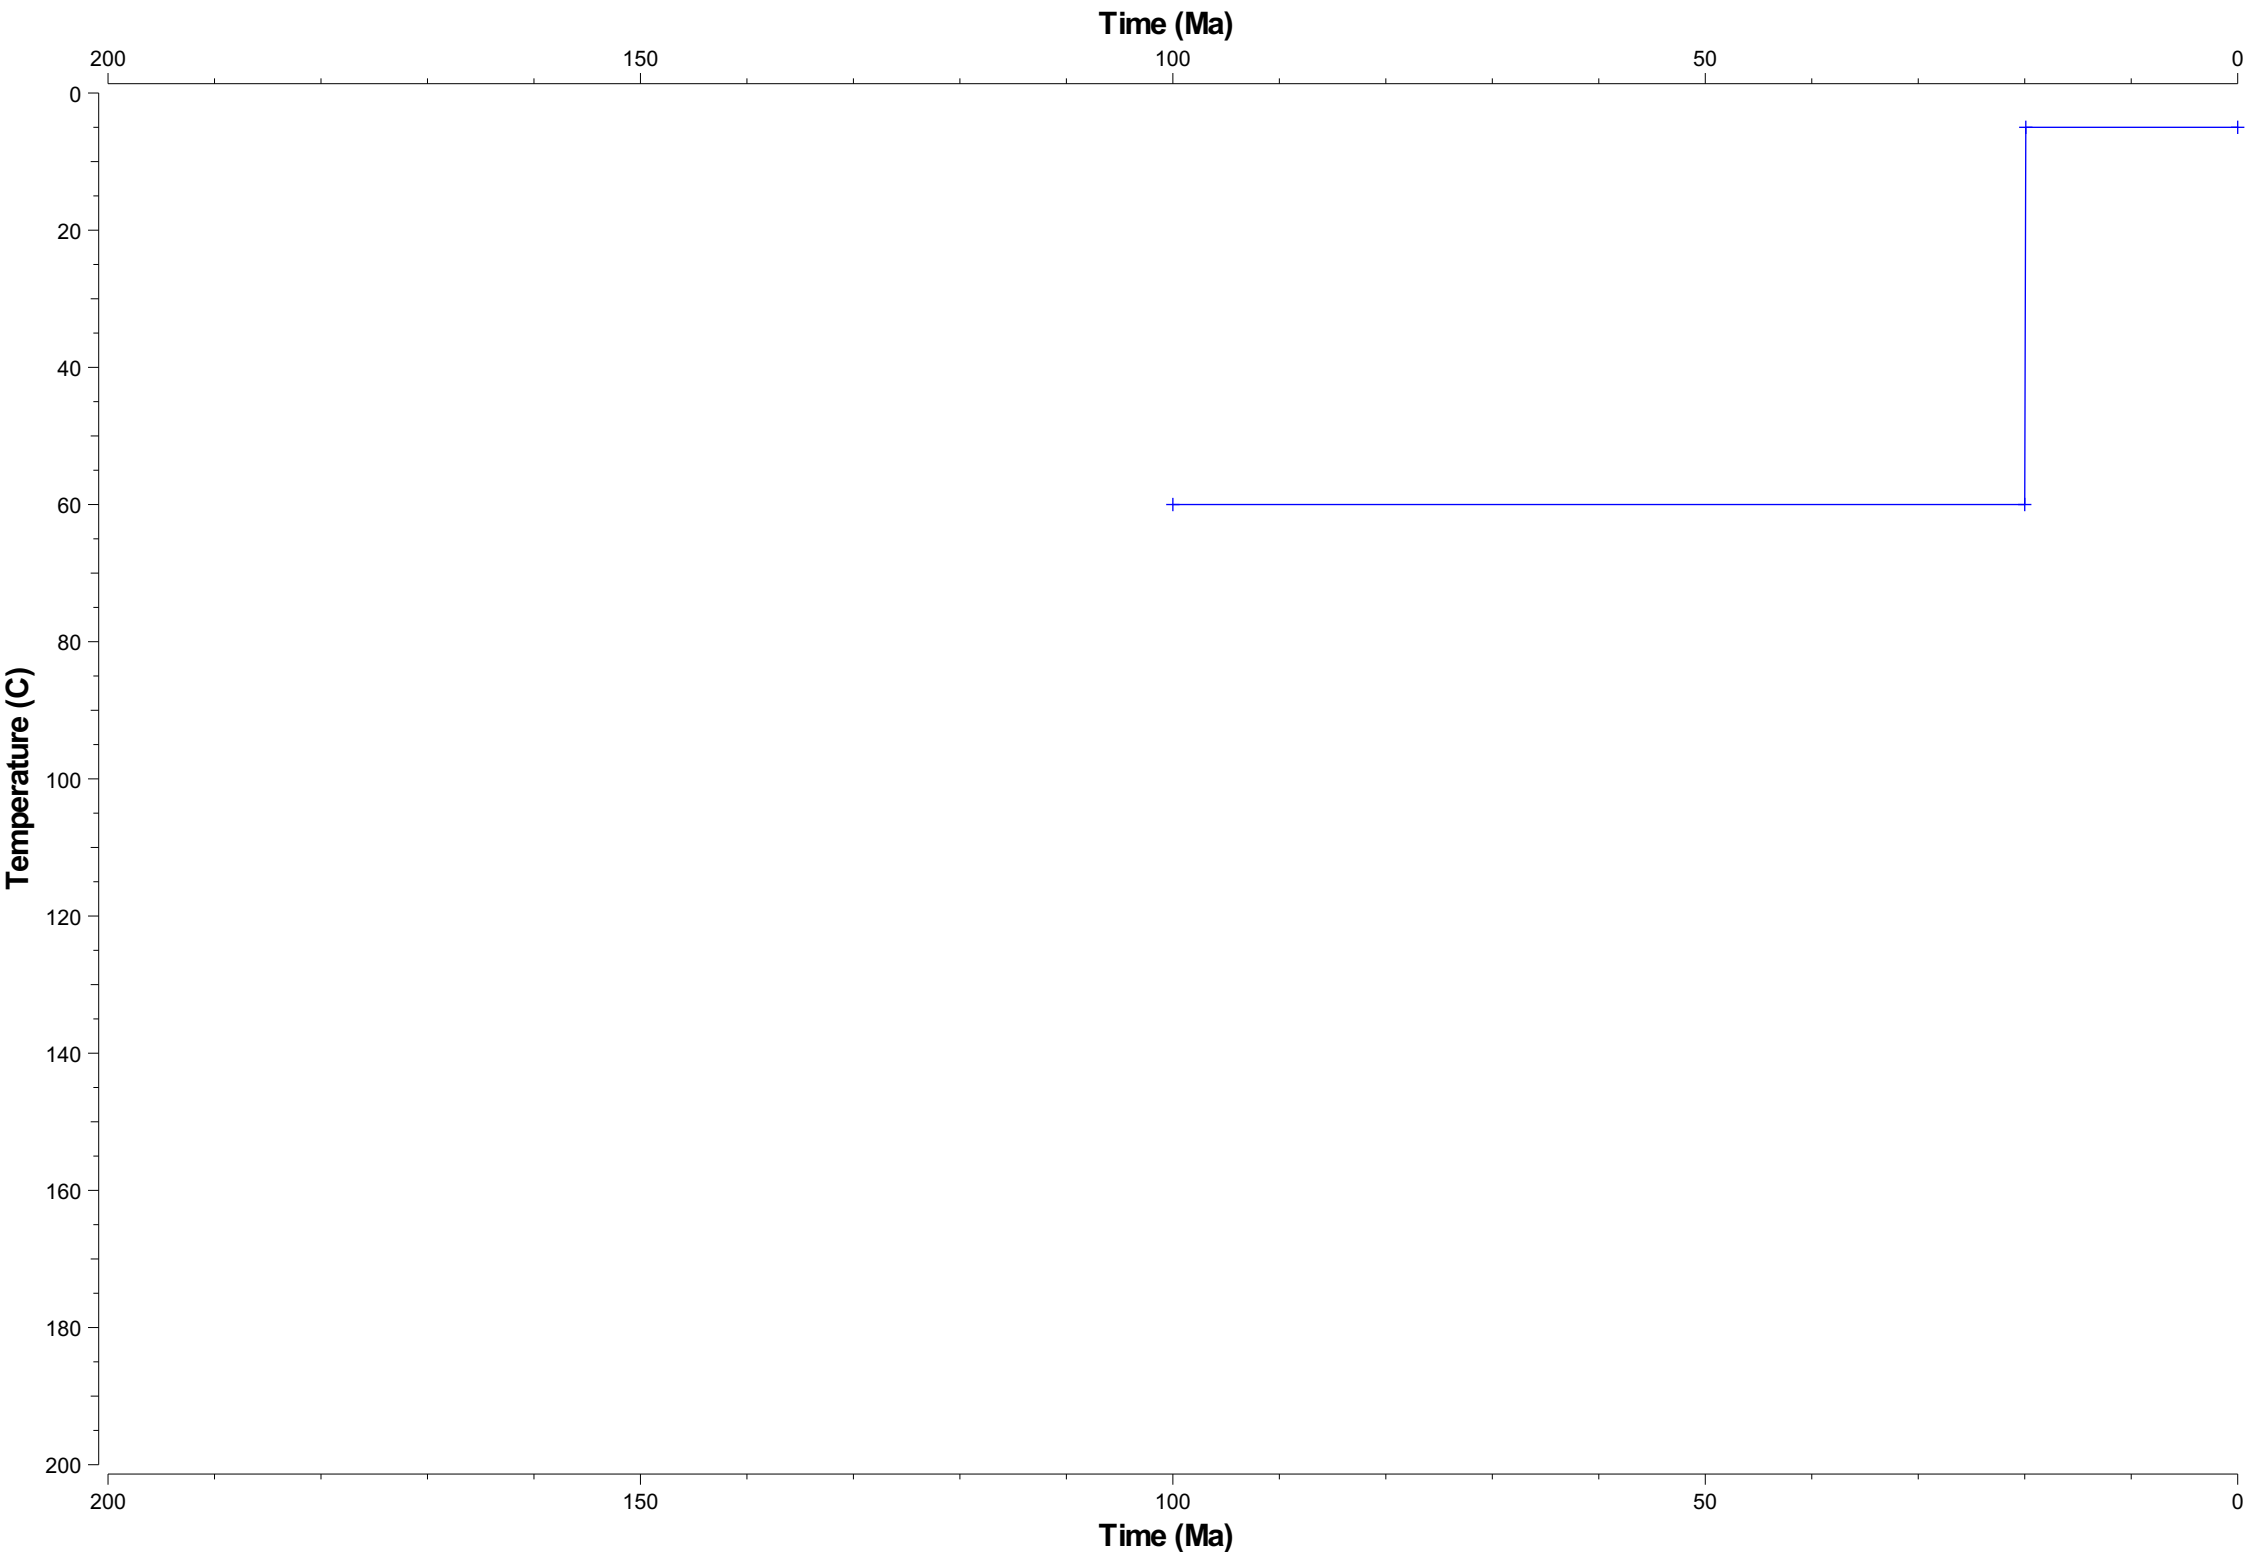

Supplement: Supplementary file 56 [file 1]

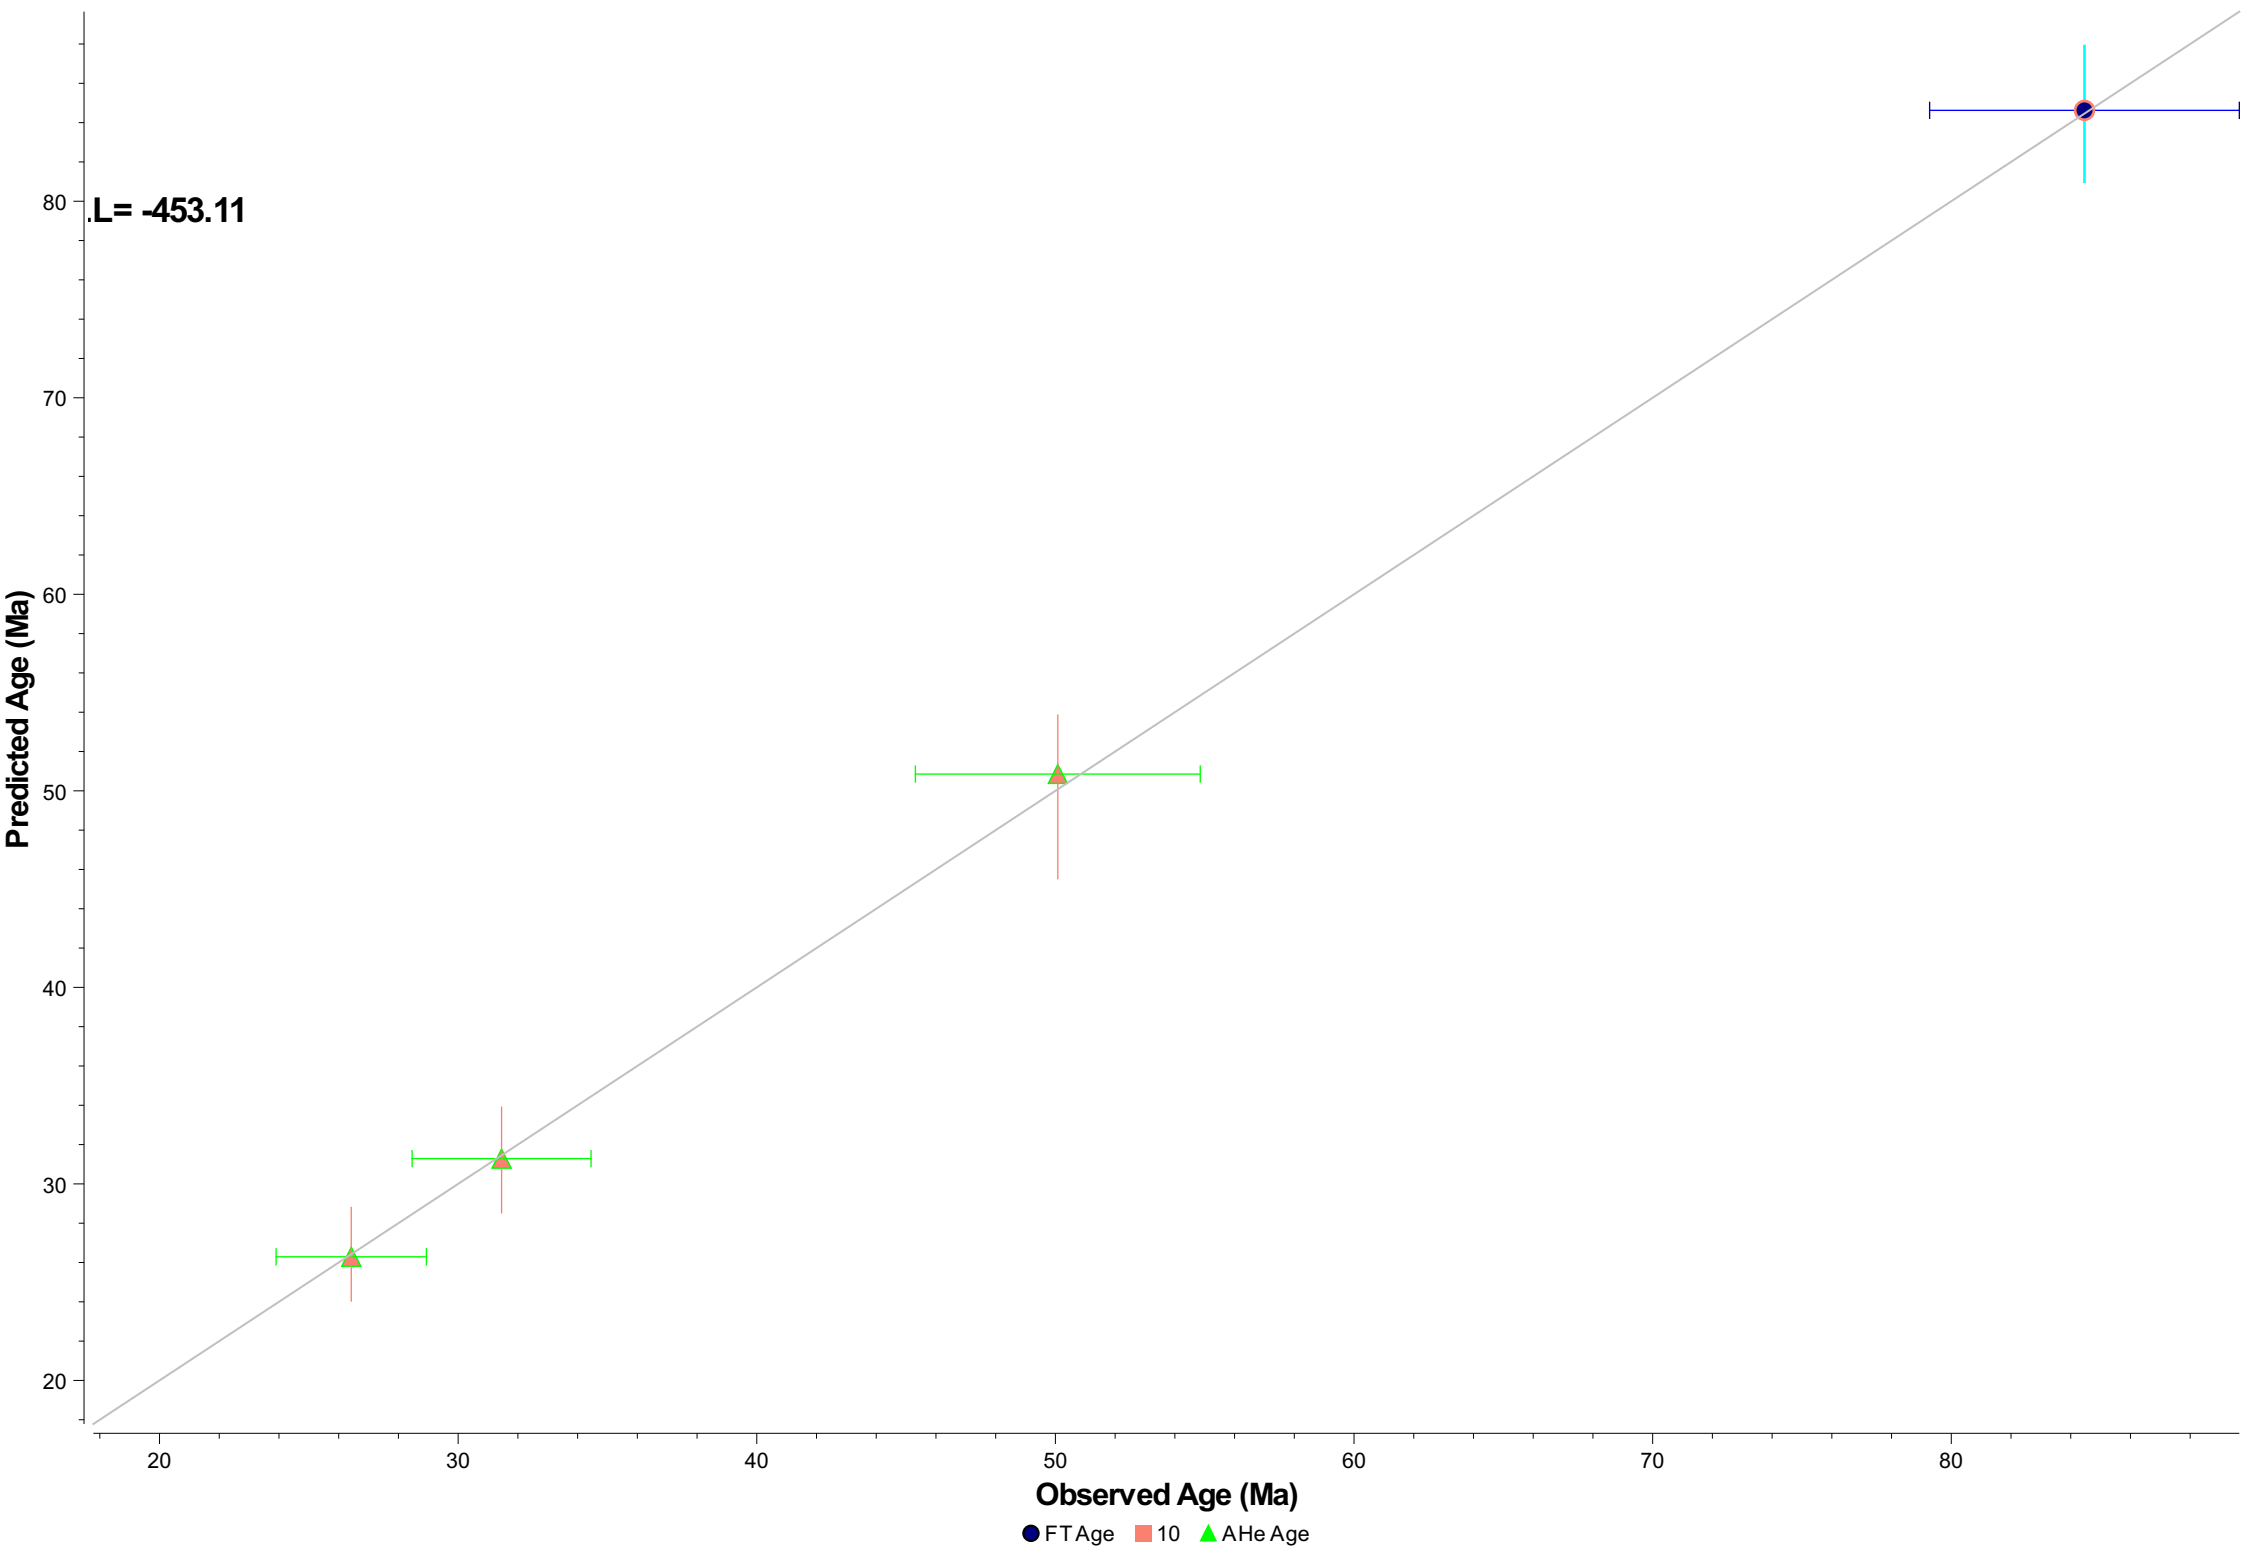

Supplement: Supplementary file 57 [file 1]

# Exercise4\_GROUPA-1\_3\_Exercise4\_InputData.txt 10.00m : Max Post

No. of tracks (m)

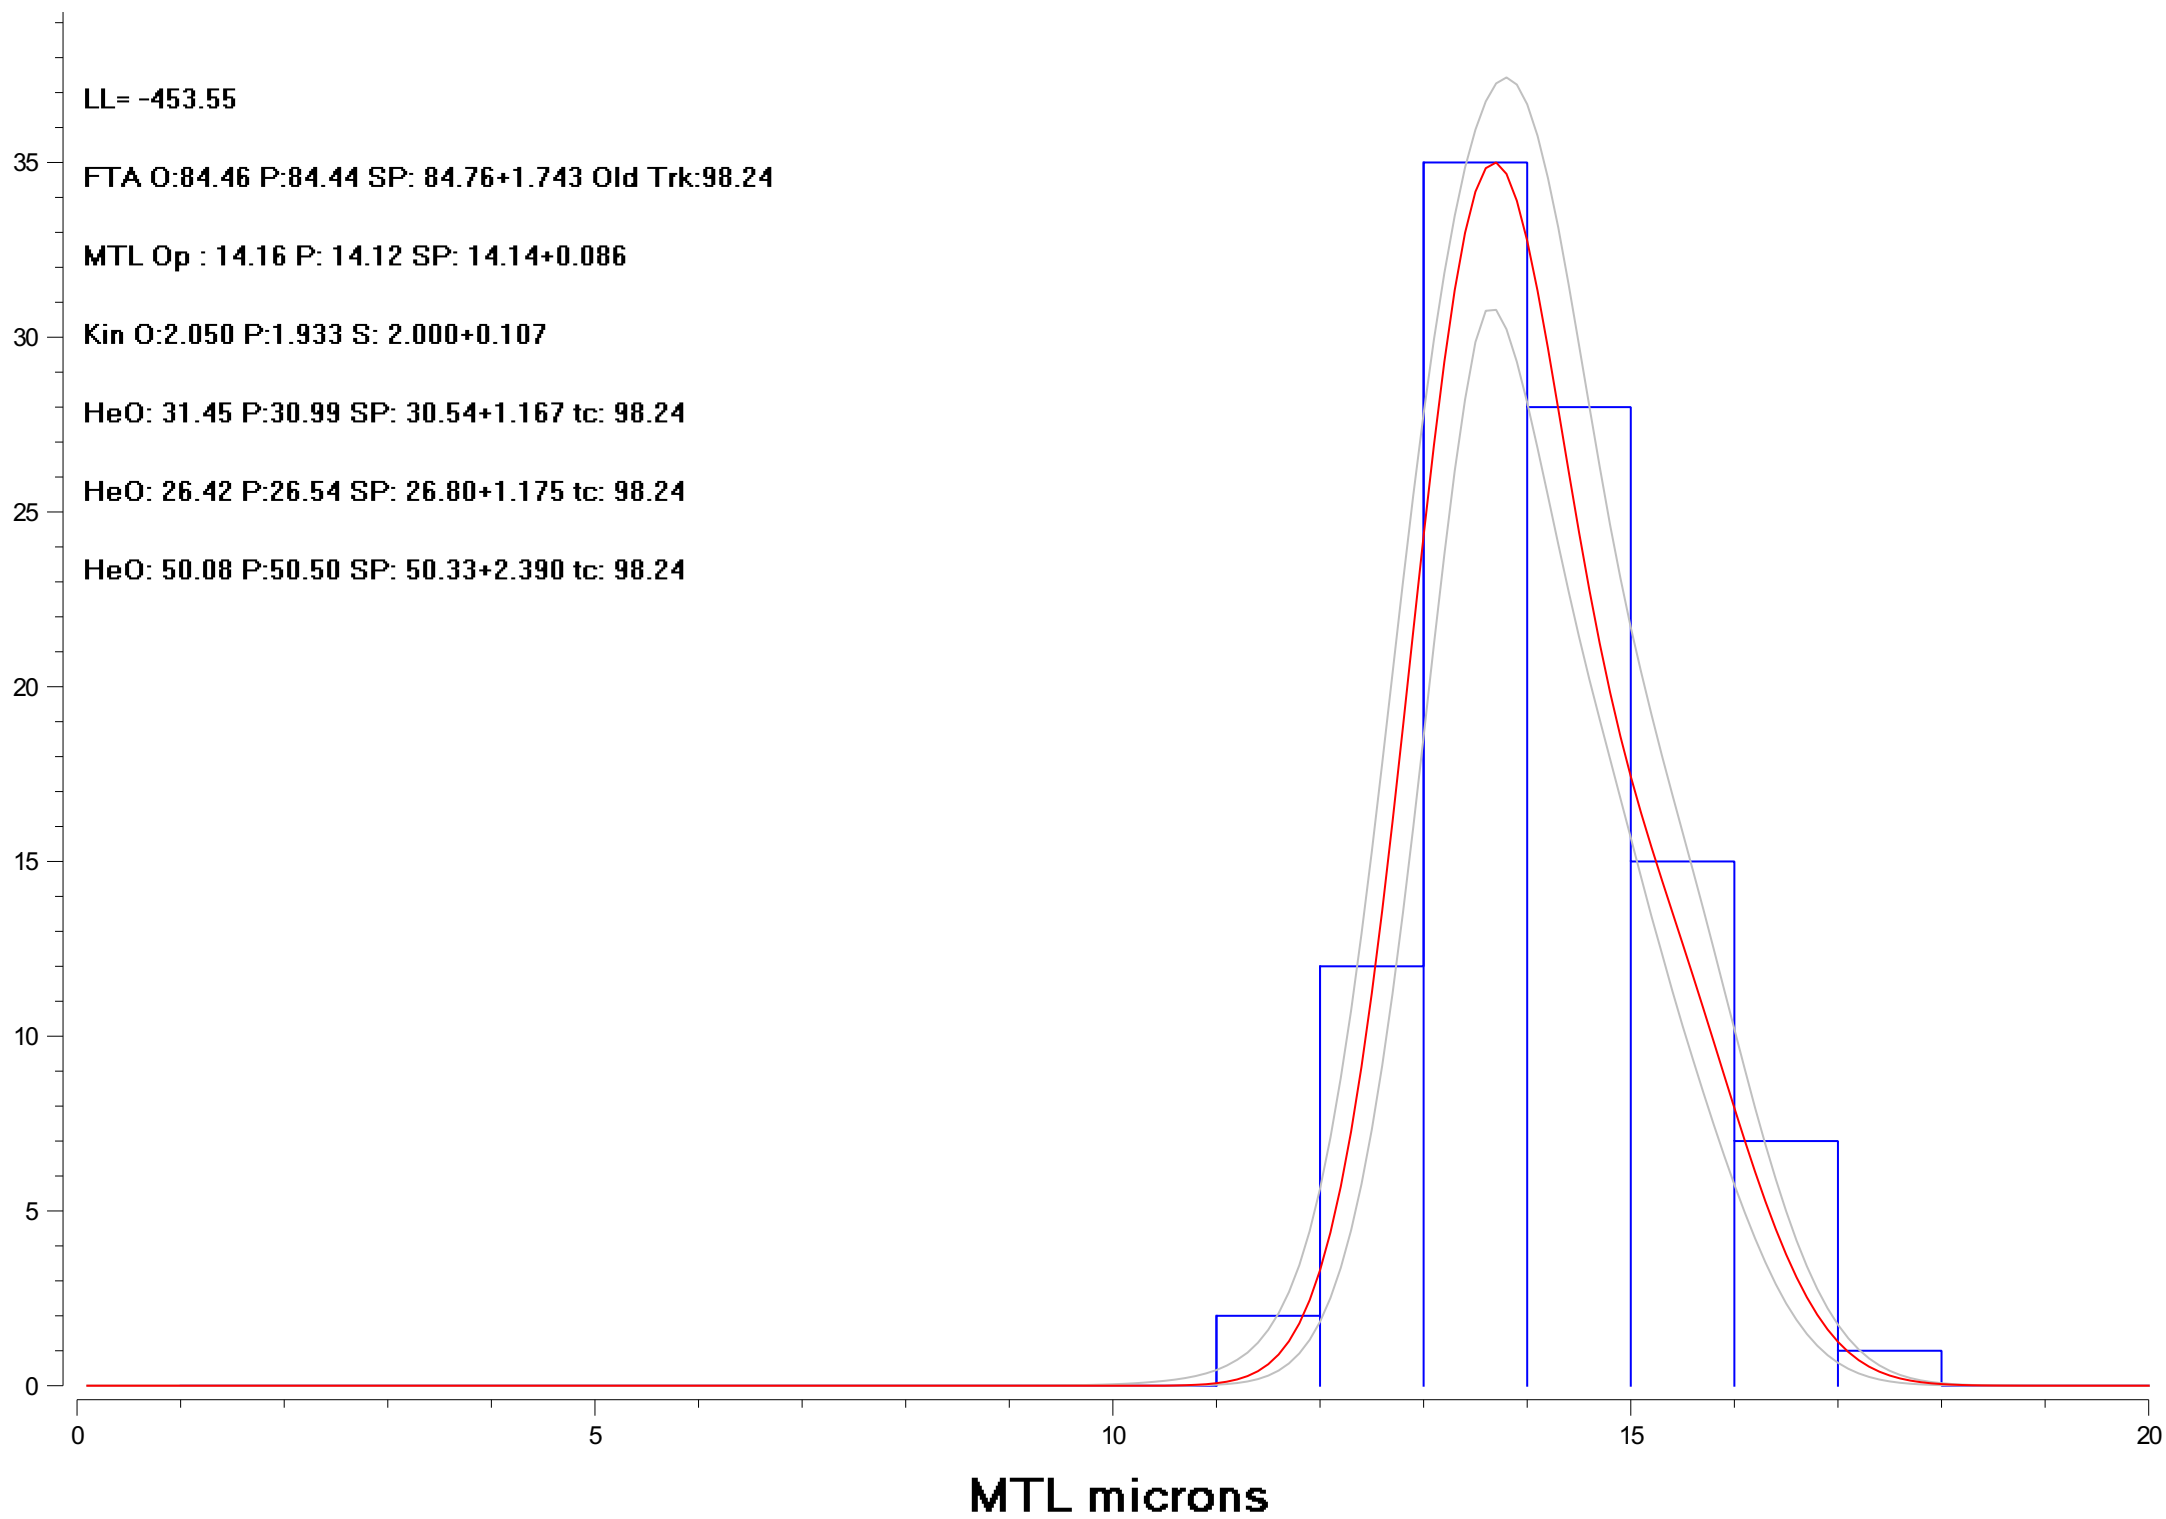

Supplement: Supplementary file 58 [file 1]

# Exercise3\_IM\_4\_Exercise3\_InputData.txt : Expected

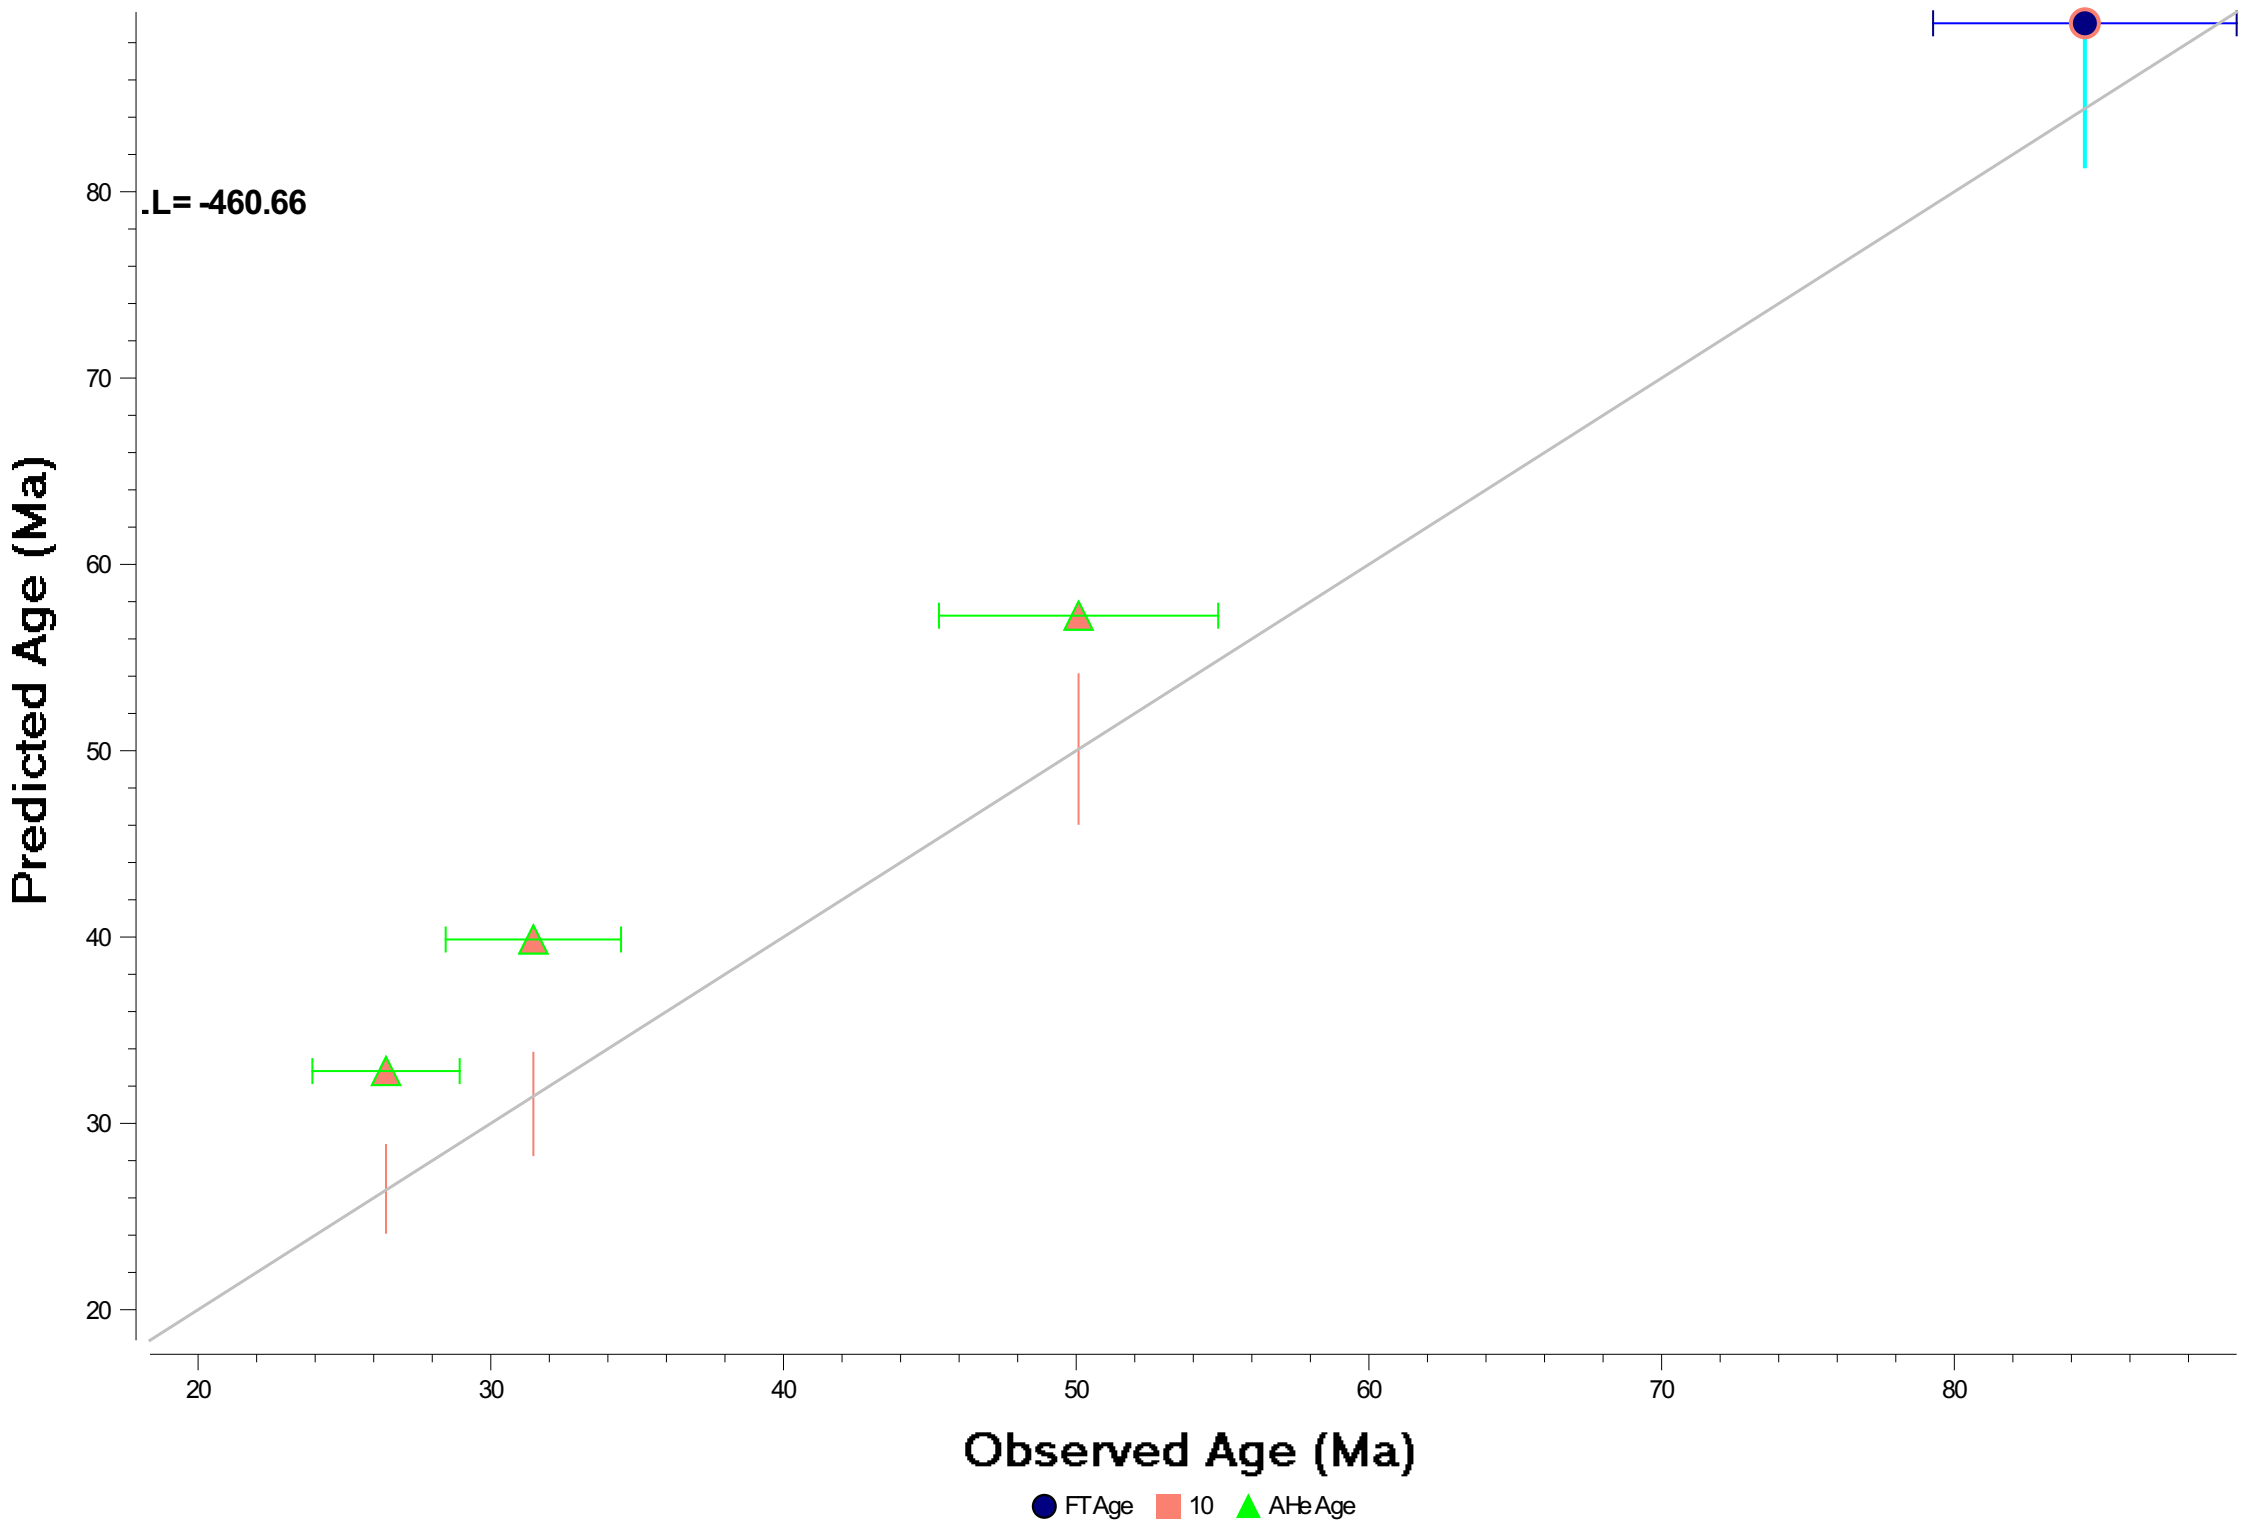

Supplement: Supplementary file 59 [file 1]

# Exercise3\_IM\_4\_Exercise3\_InputData.txt 10.00m : Max Post

No. of tracks (m)

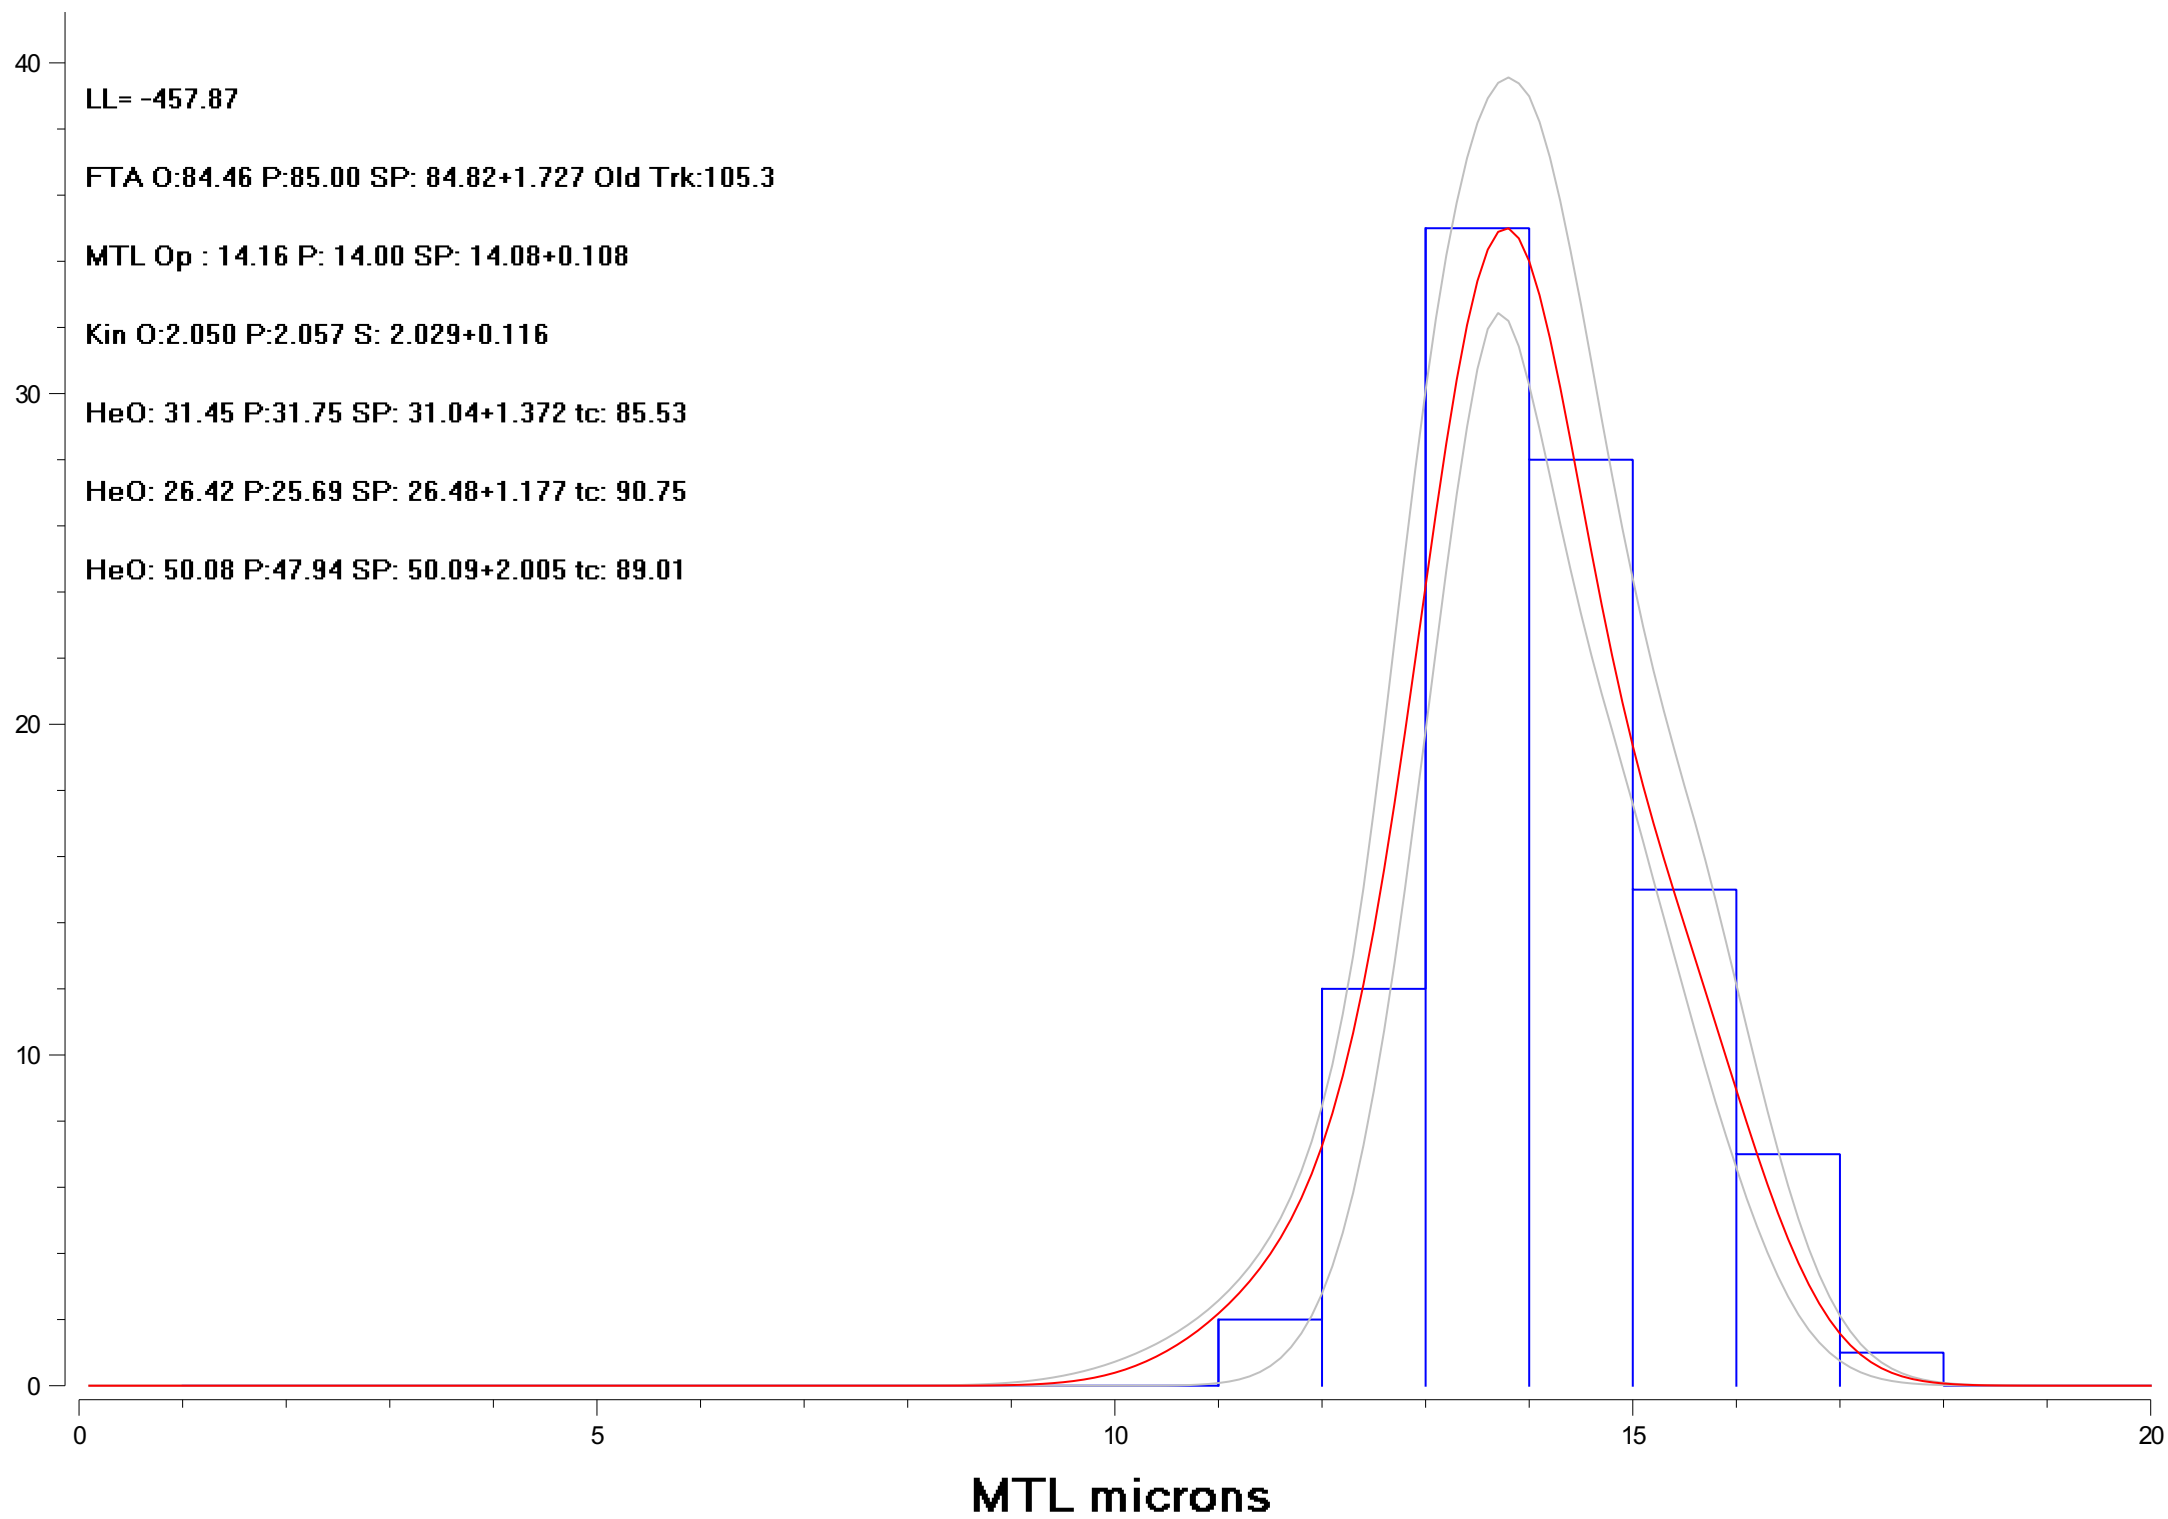

Supplement: Supplementary file 60 [file 1]

Temperature (C)

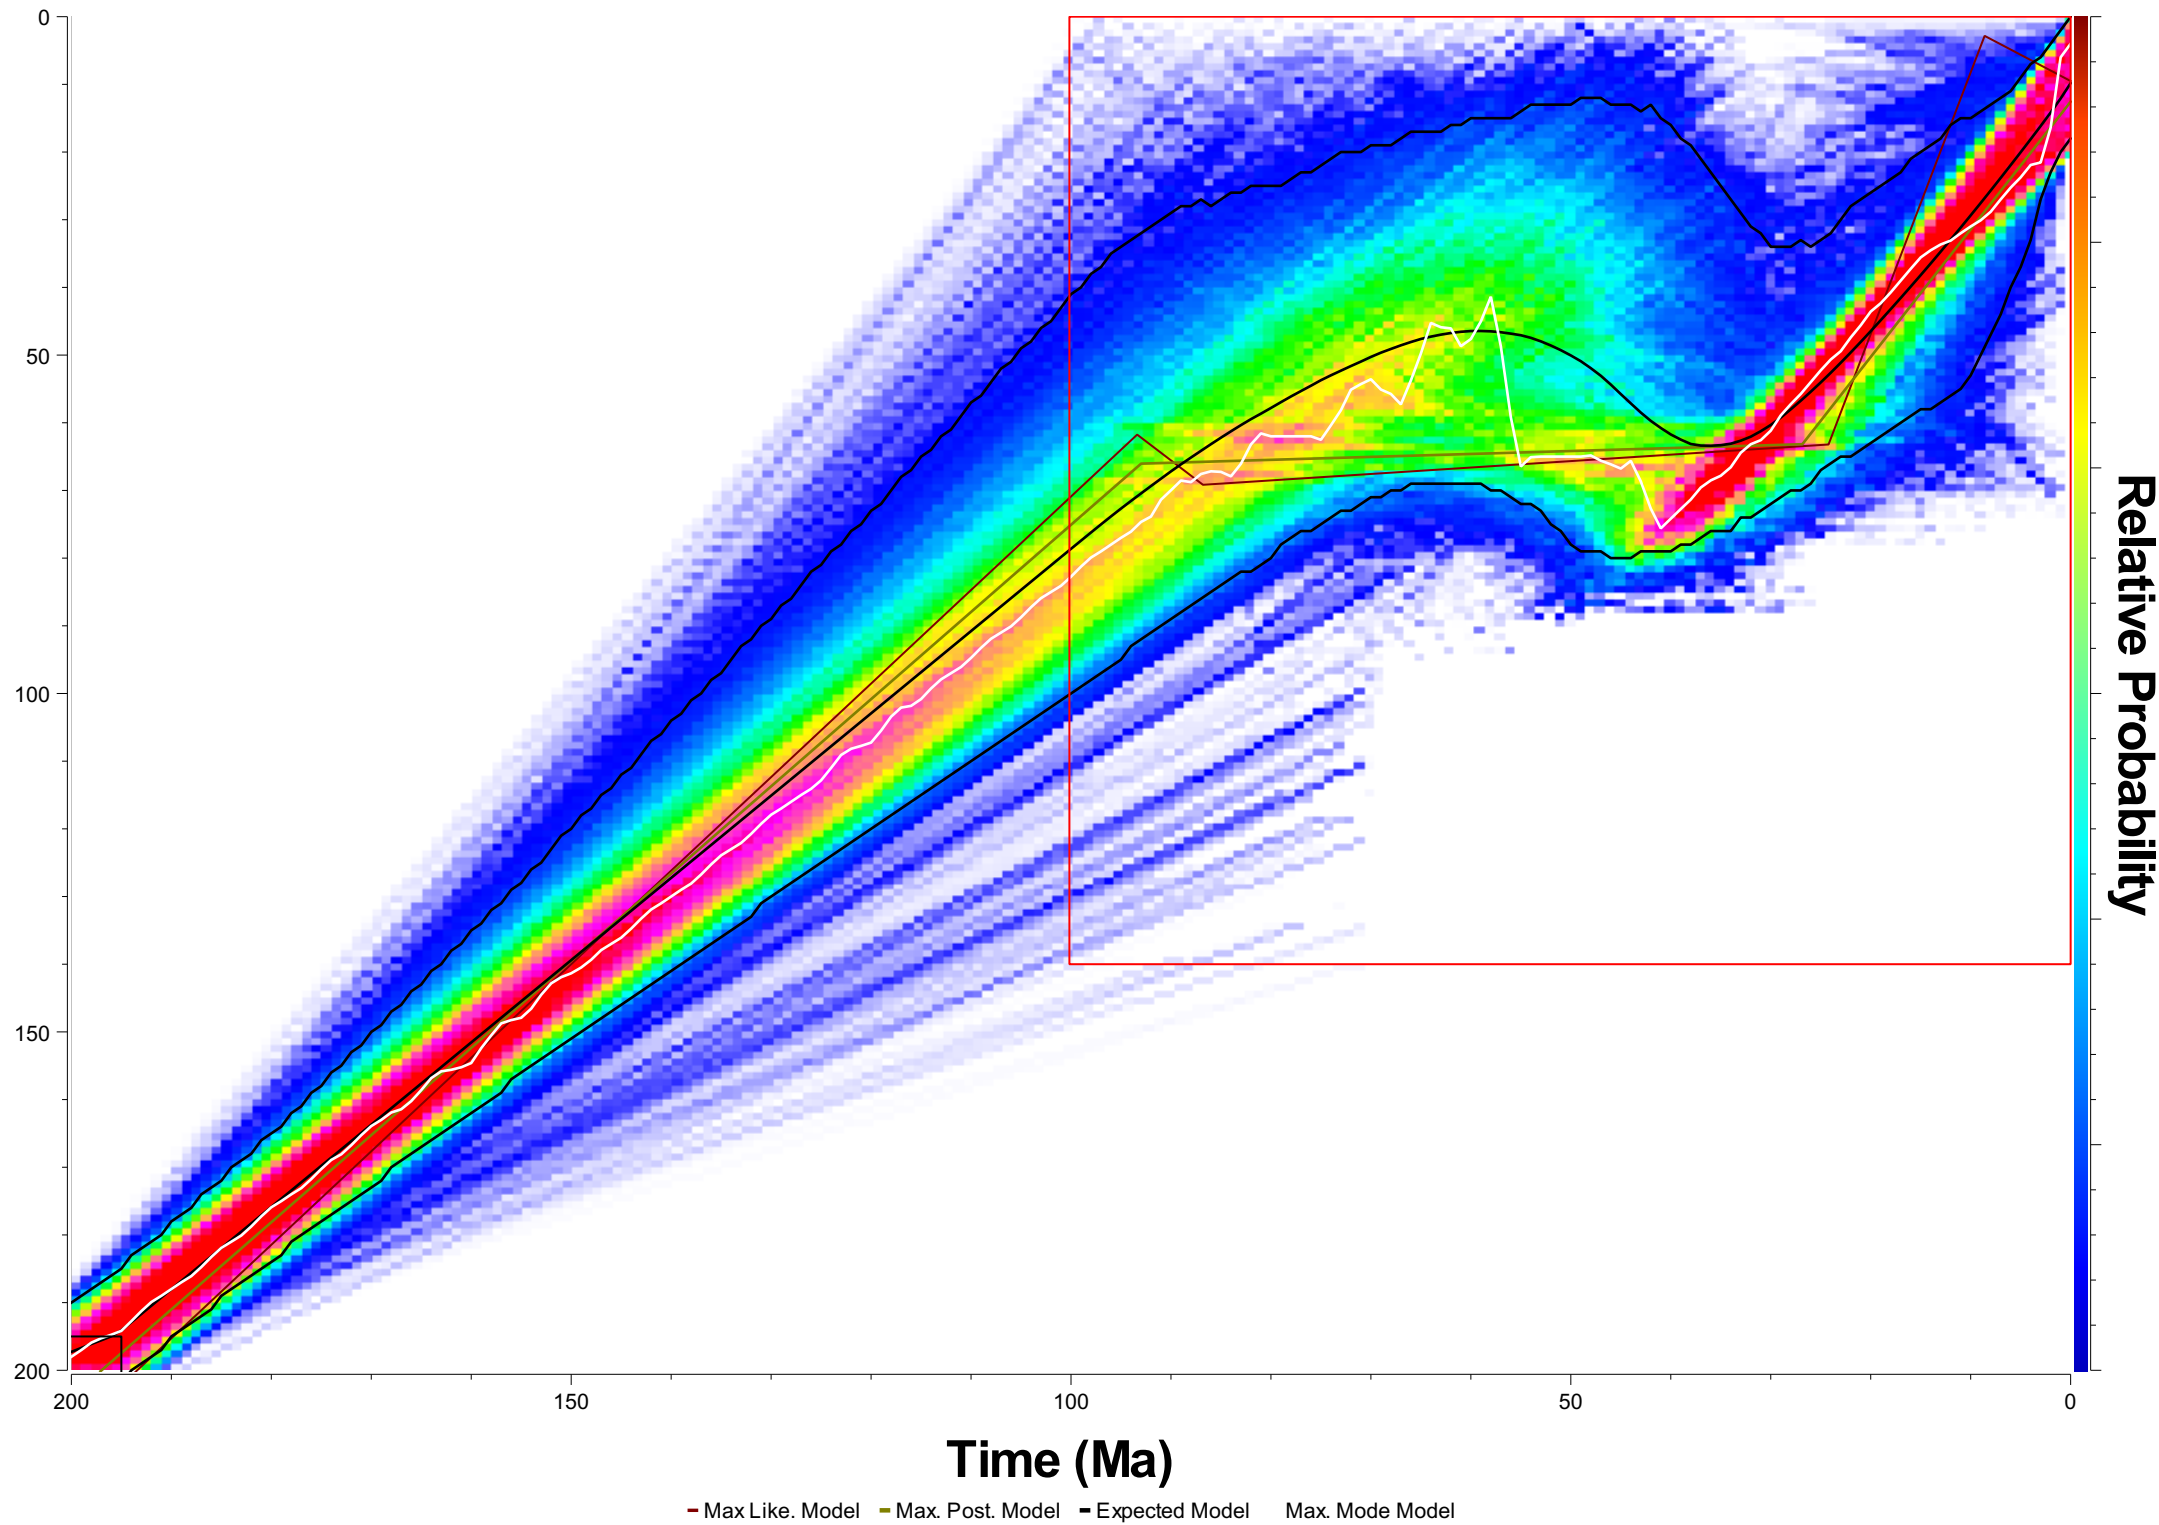

Supplement: Supplementary file 61 [file 1]

# Exercise3\_IM\_4

Log Likelihood

No. of  $T(t)$  points

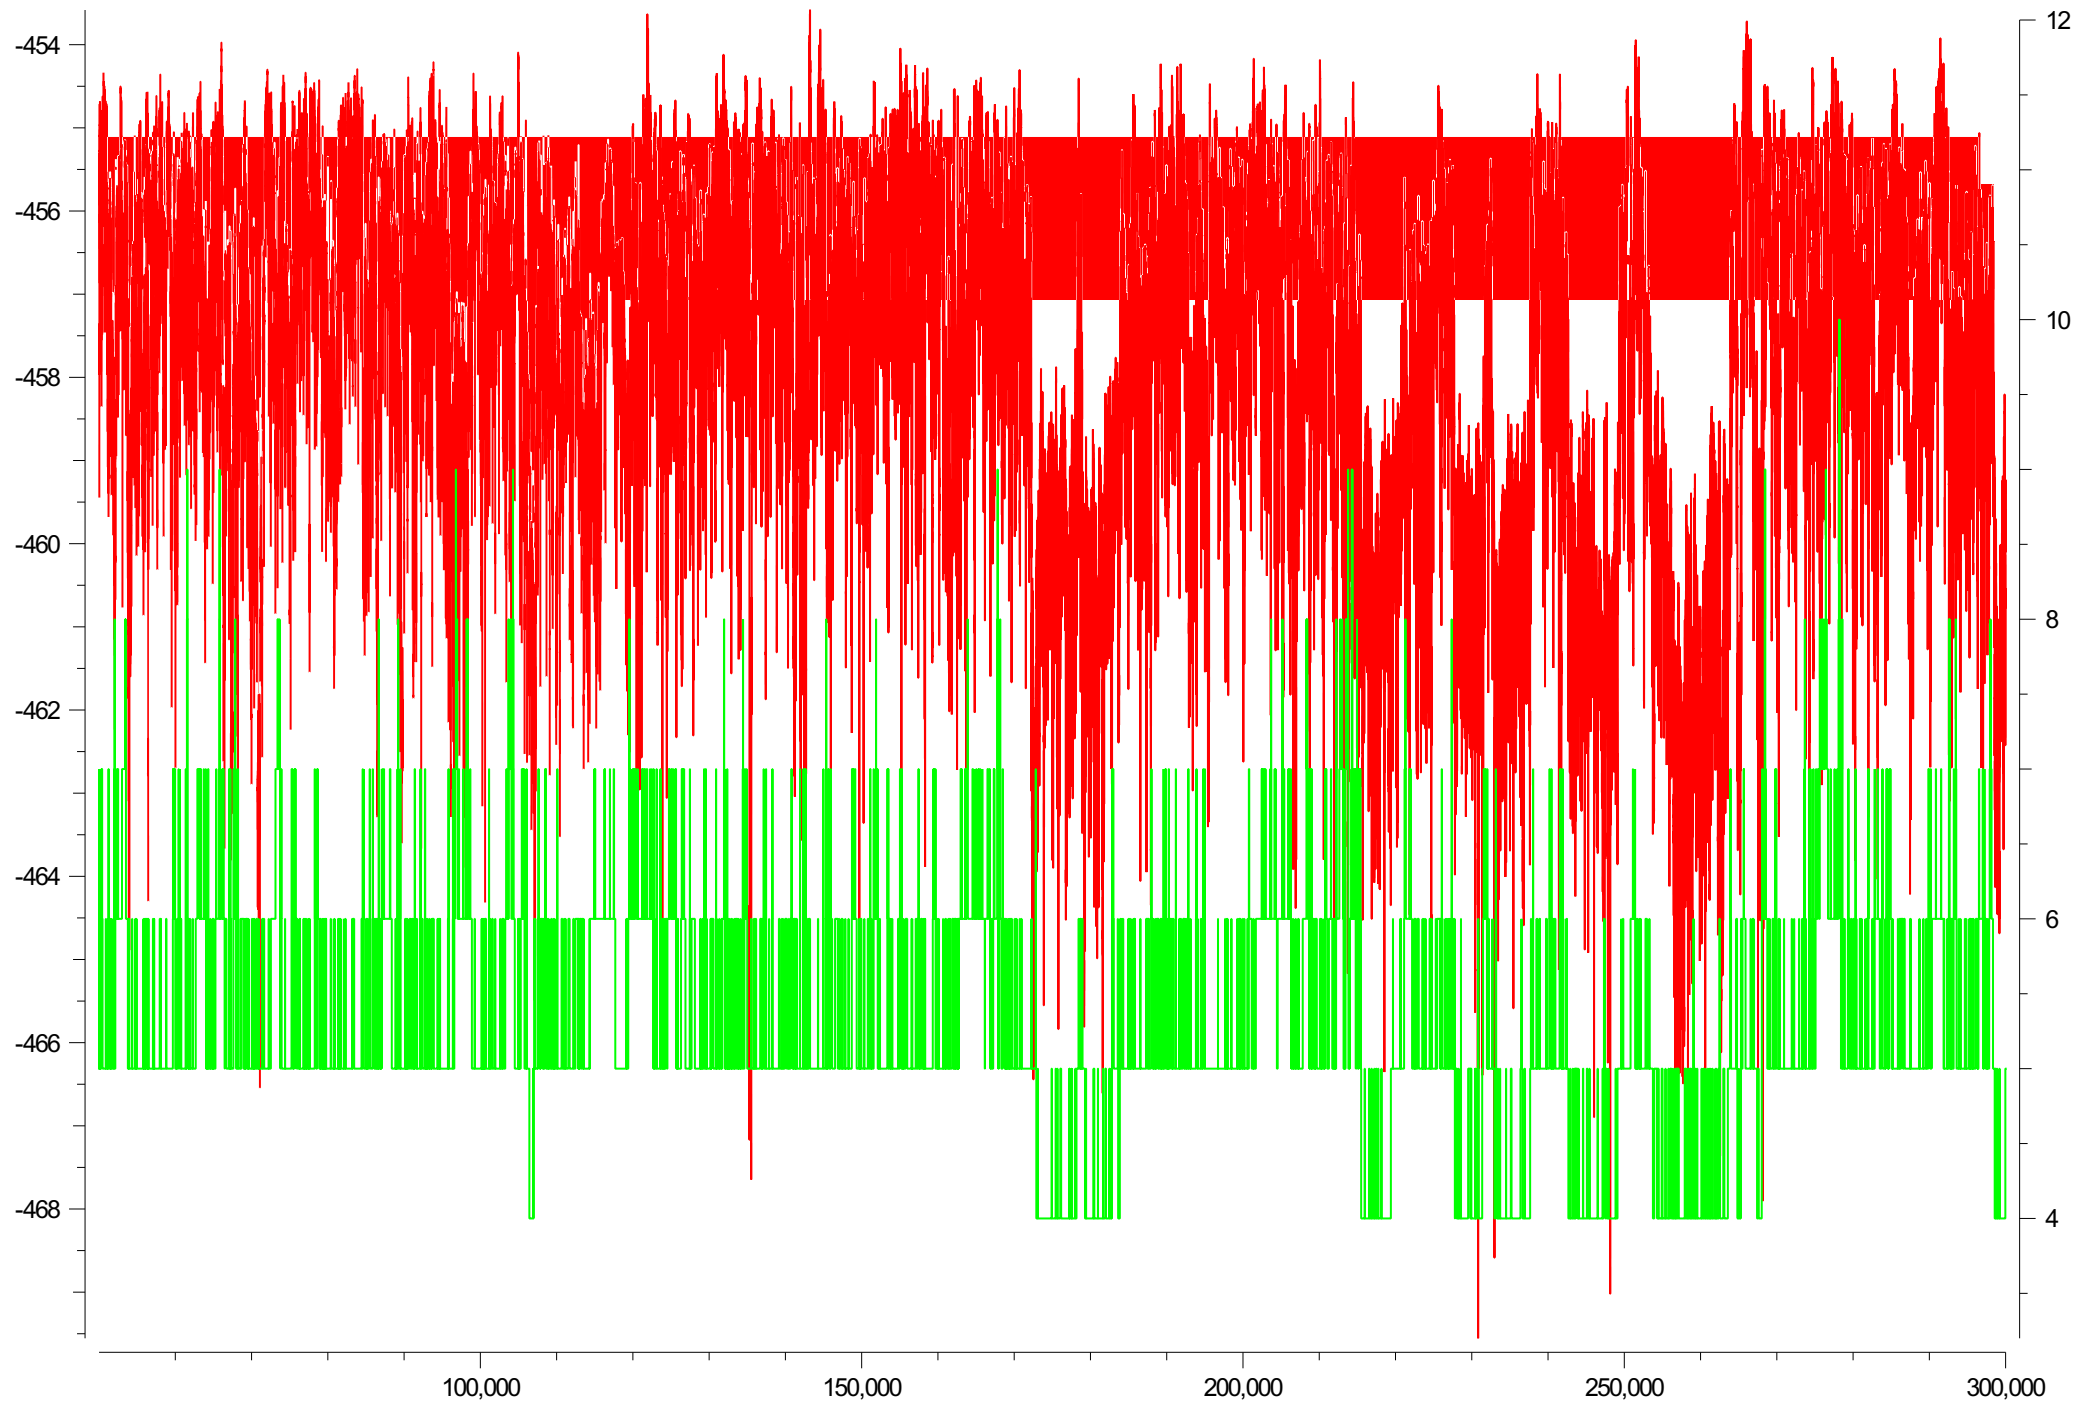

— Likelihood — No. of  $T(t)$  points

Supplement: Supplementary file 62 [file 1]

# Exercise3\_IM\_4

Log Posterior

No. of  $T(t)$  points

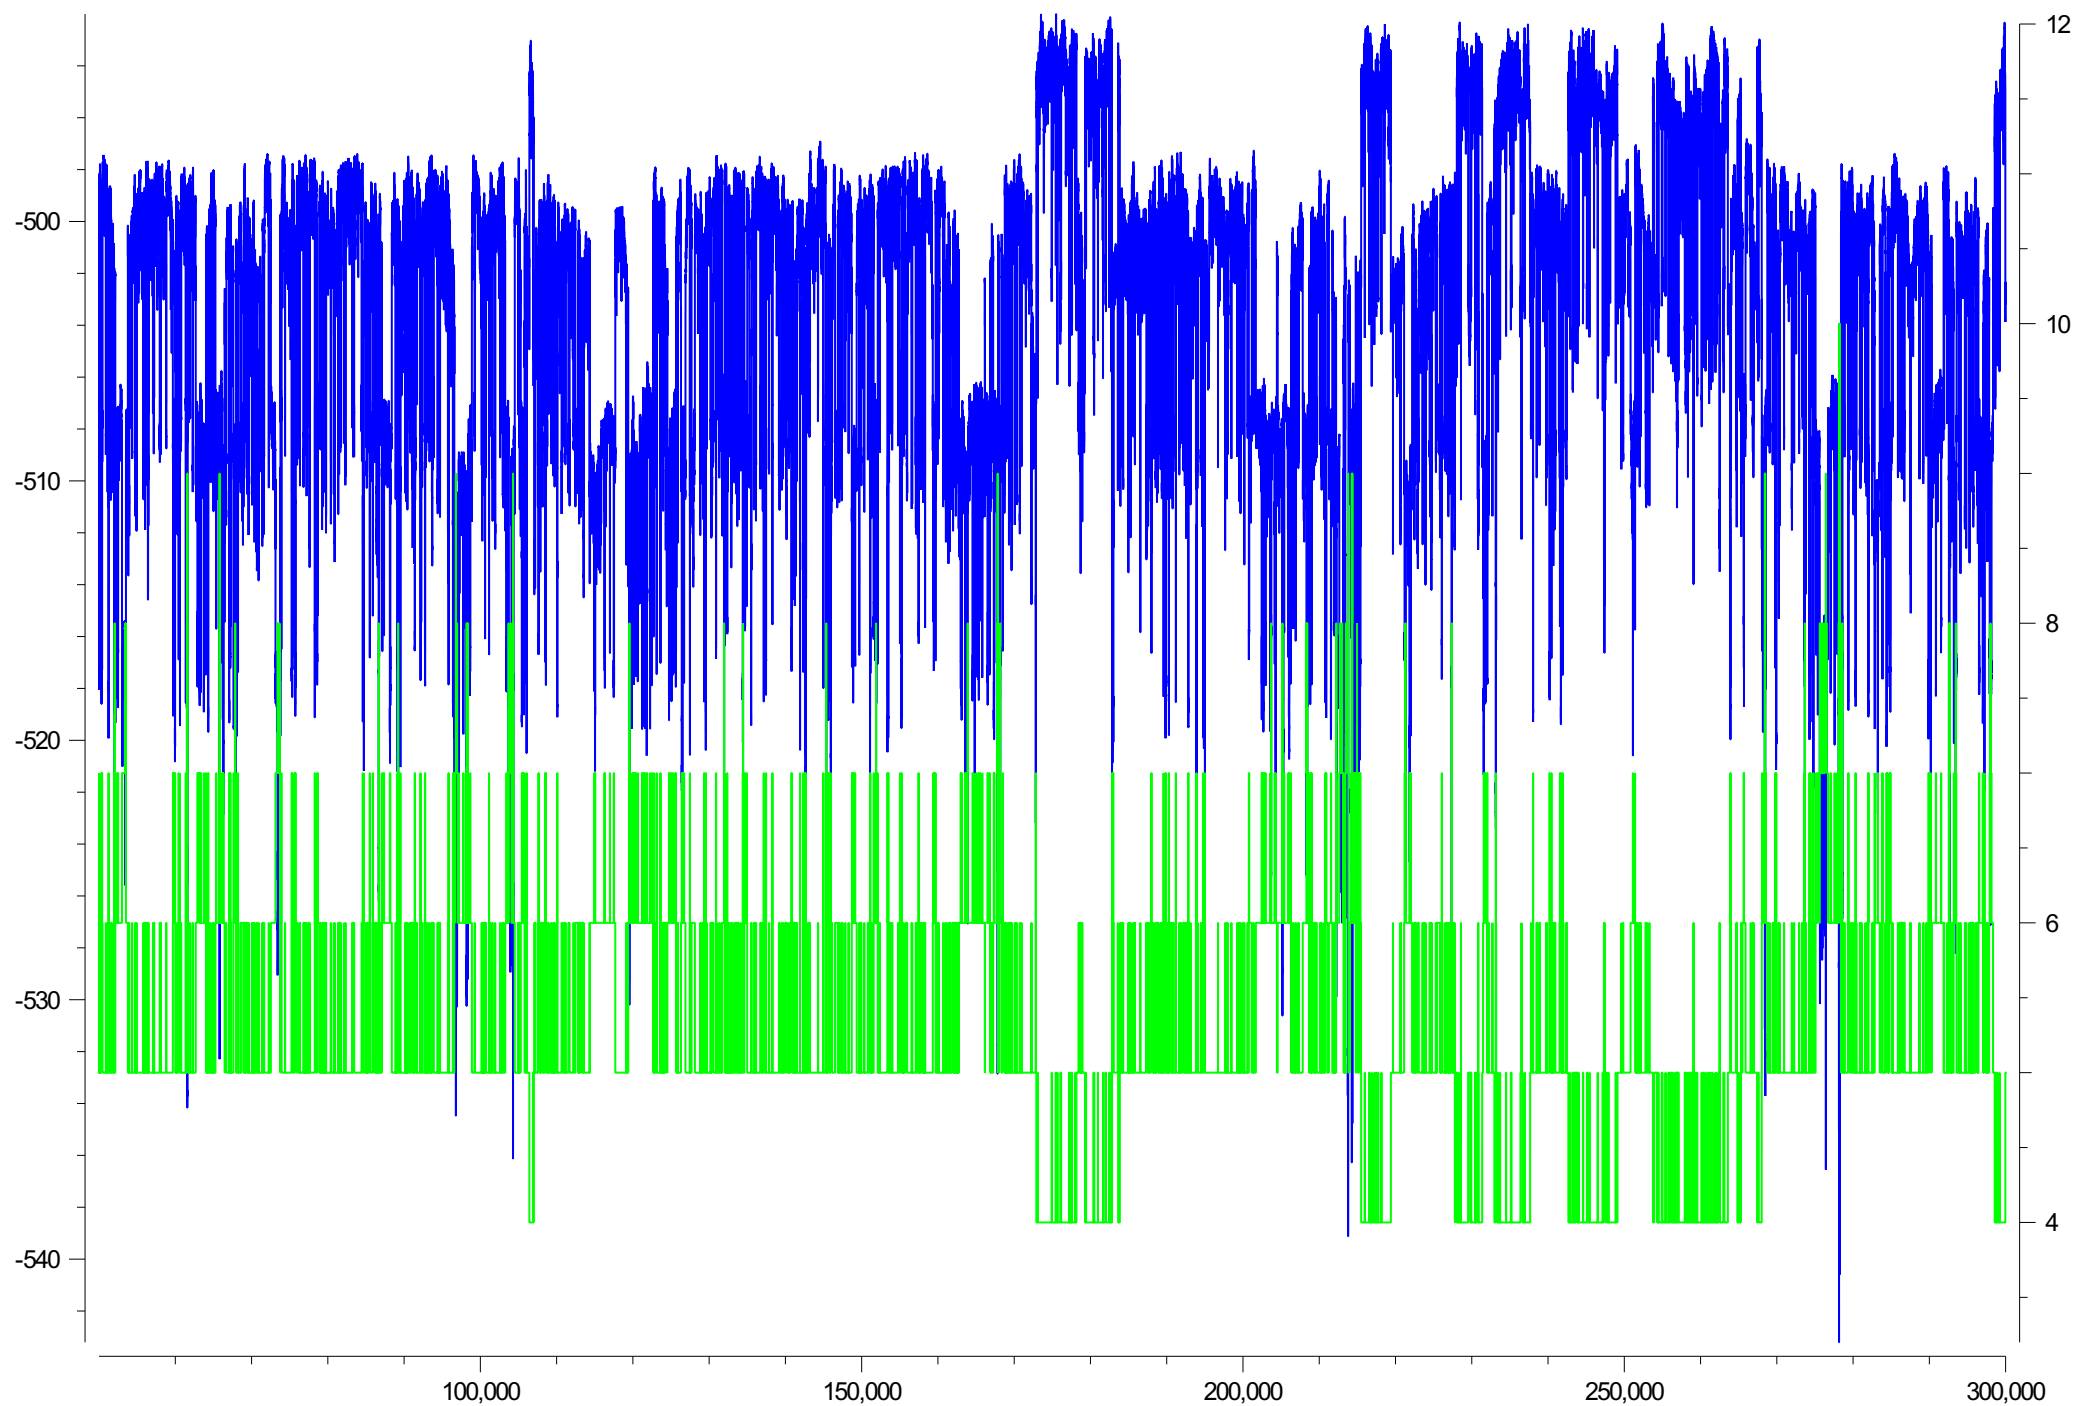

Iteration

— Posterior — No. of  $T(t)$  points

Supplement: Supplementary file 63 [file 1]

# Exercise4\_GROUPA-1\_3\_Exercise4\_InputData.txt : Max Posterior

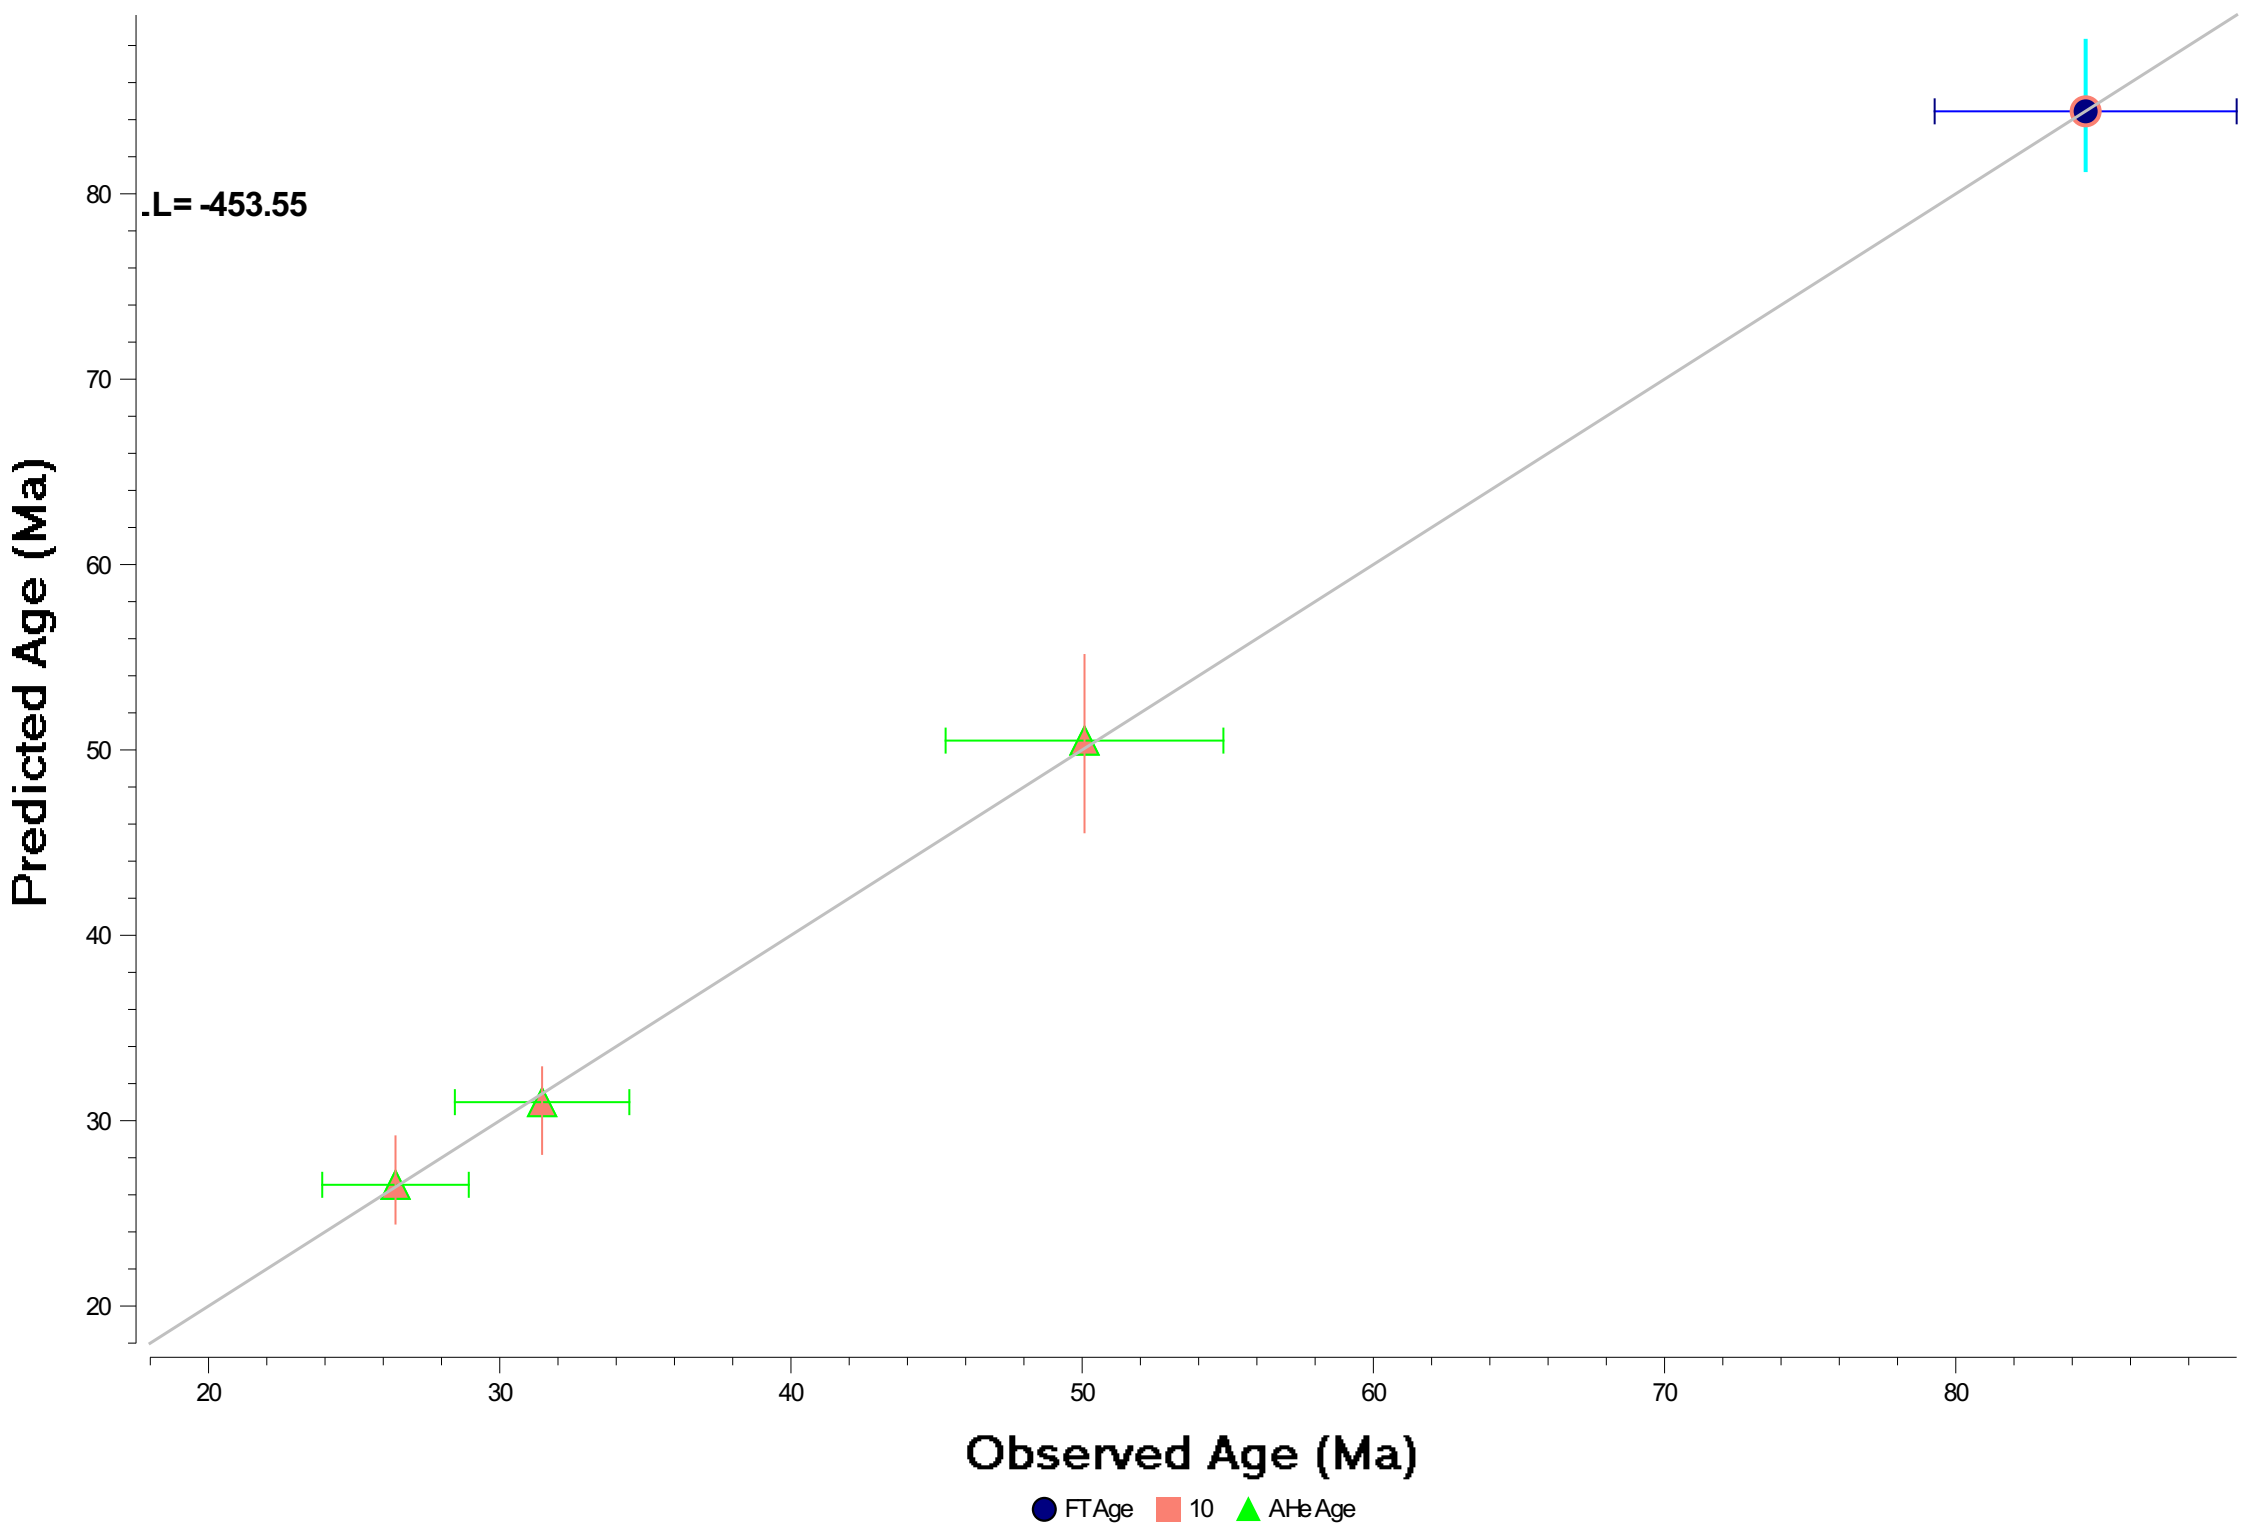

Supplement: Supplementary file 64 [file 1]

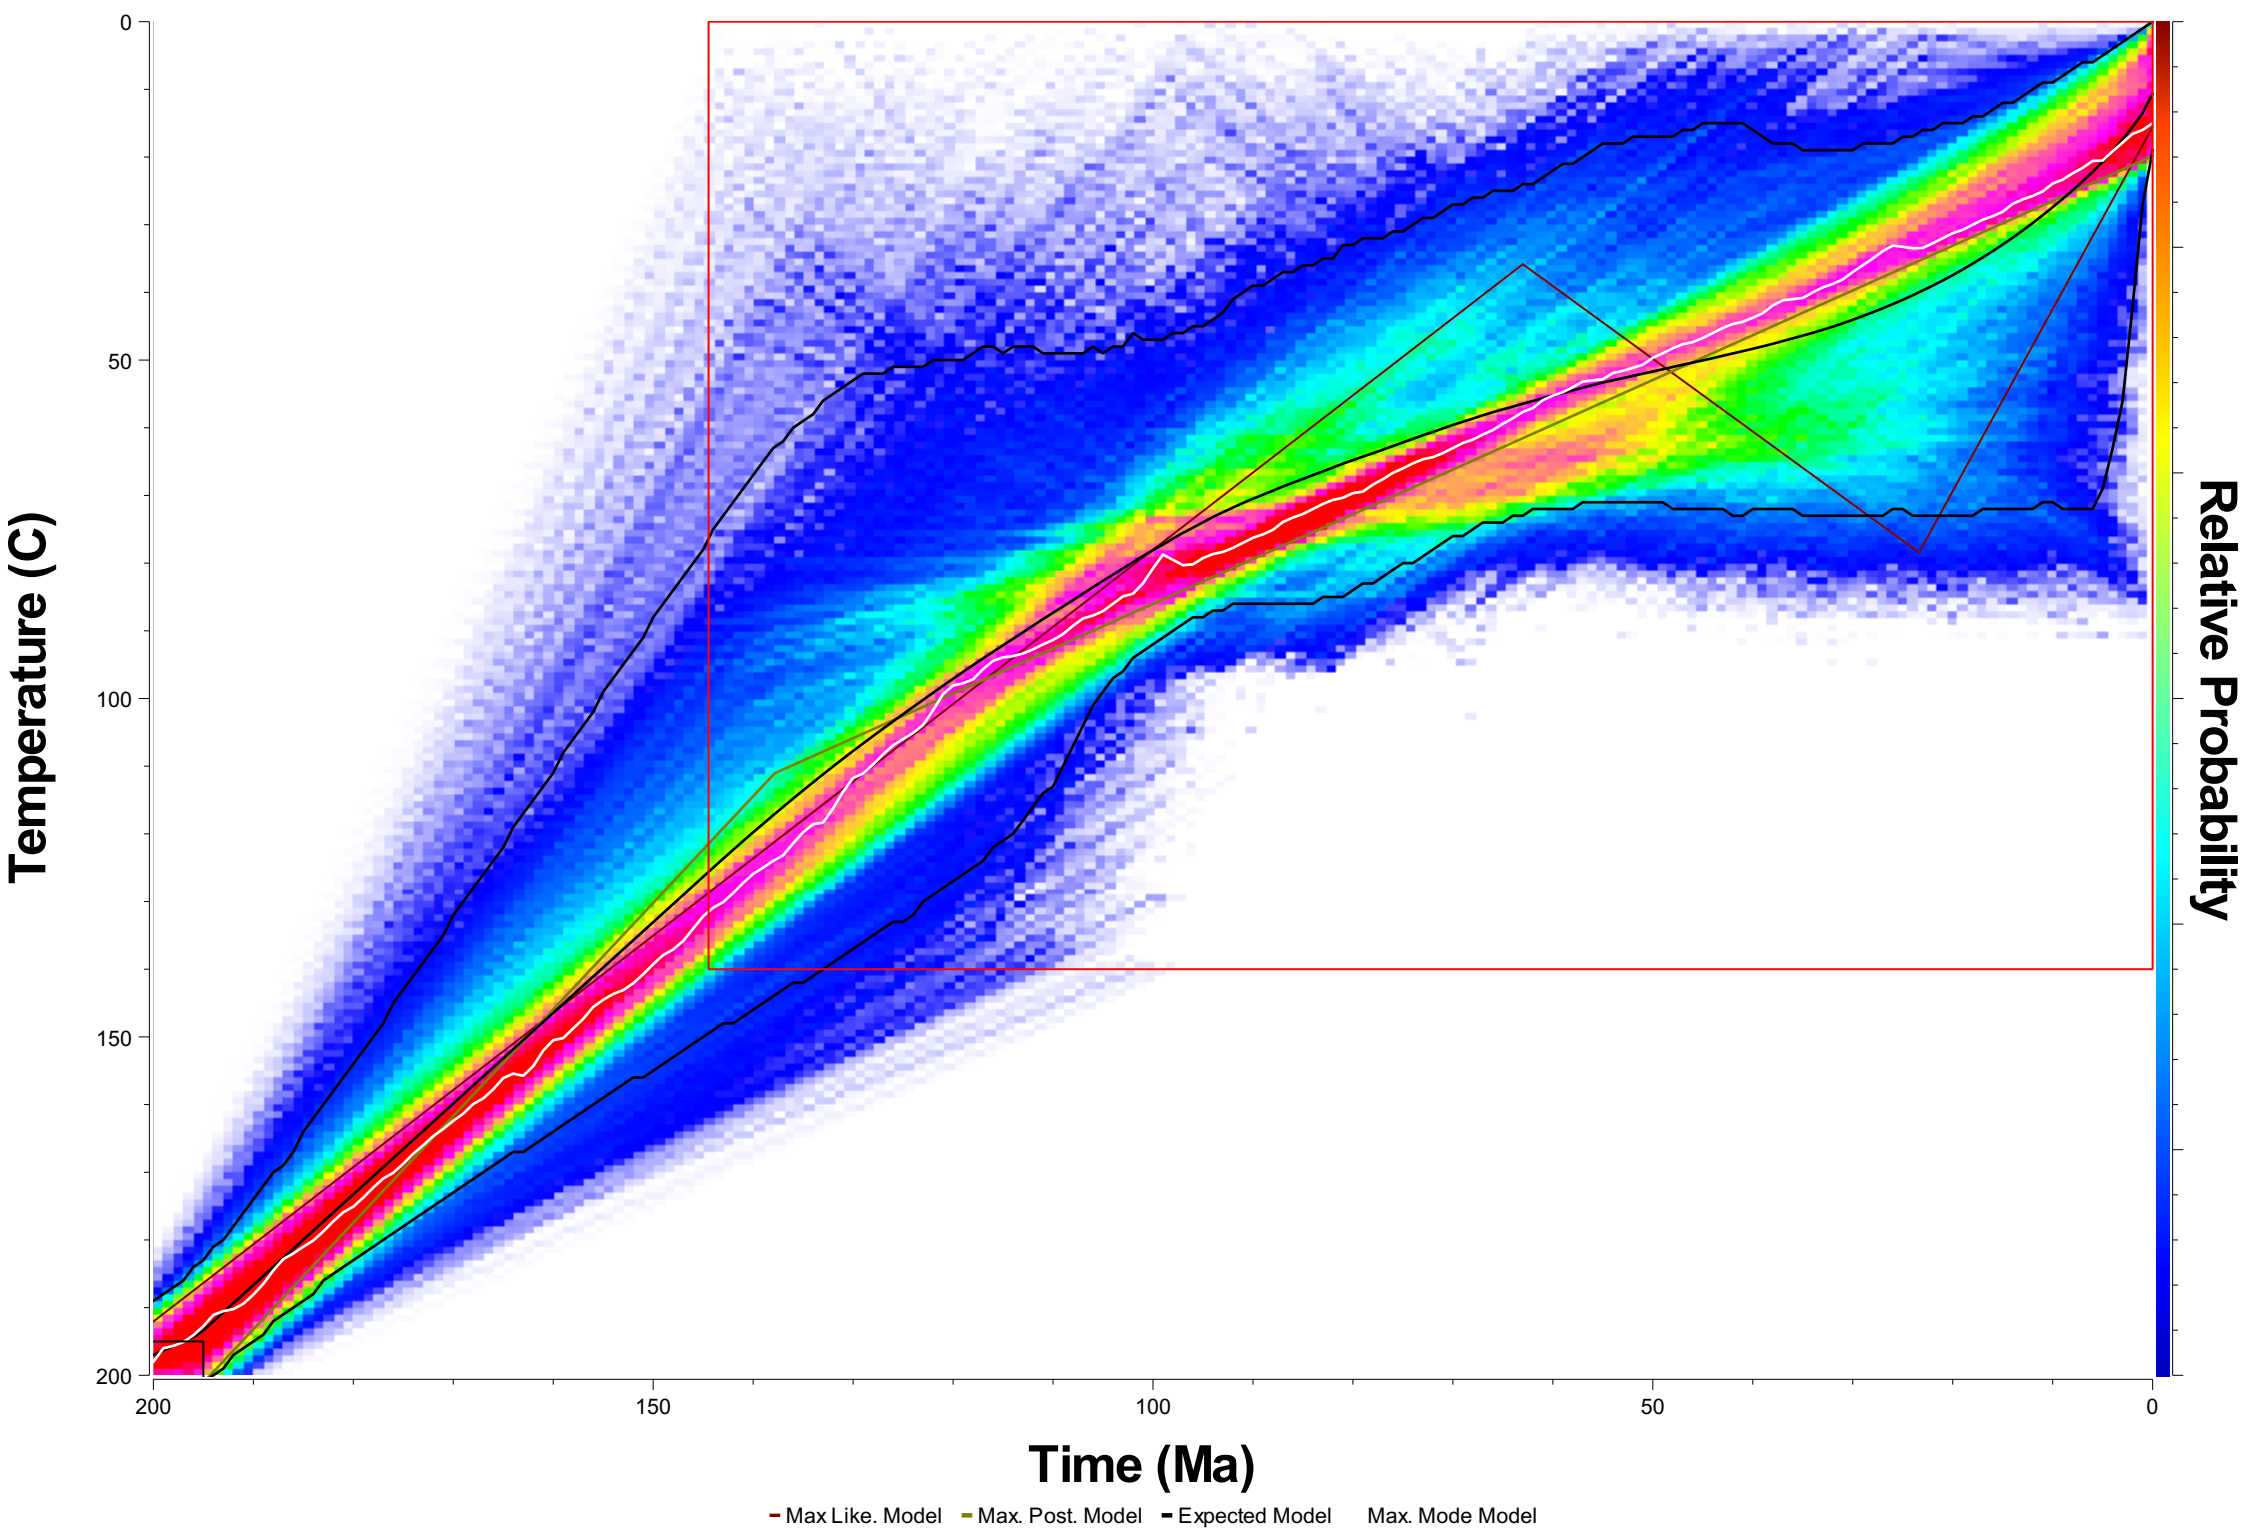

Supplement: Supplementary file 65 [file 1]

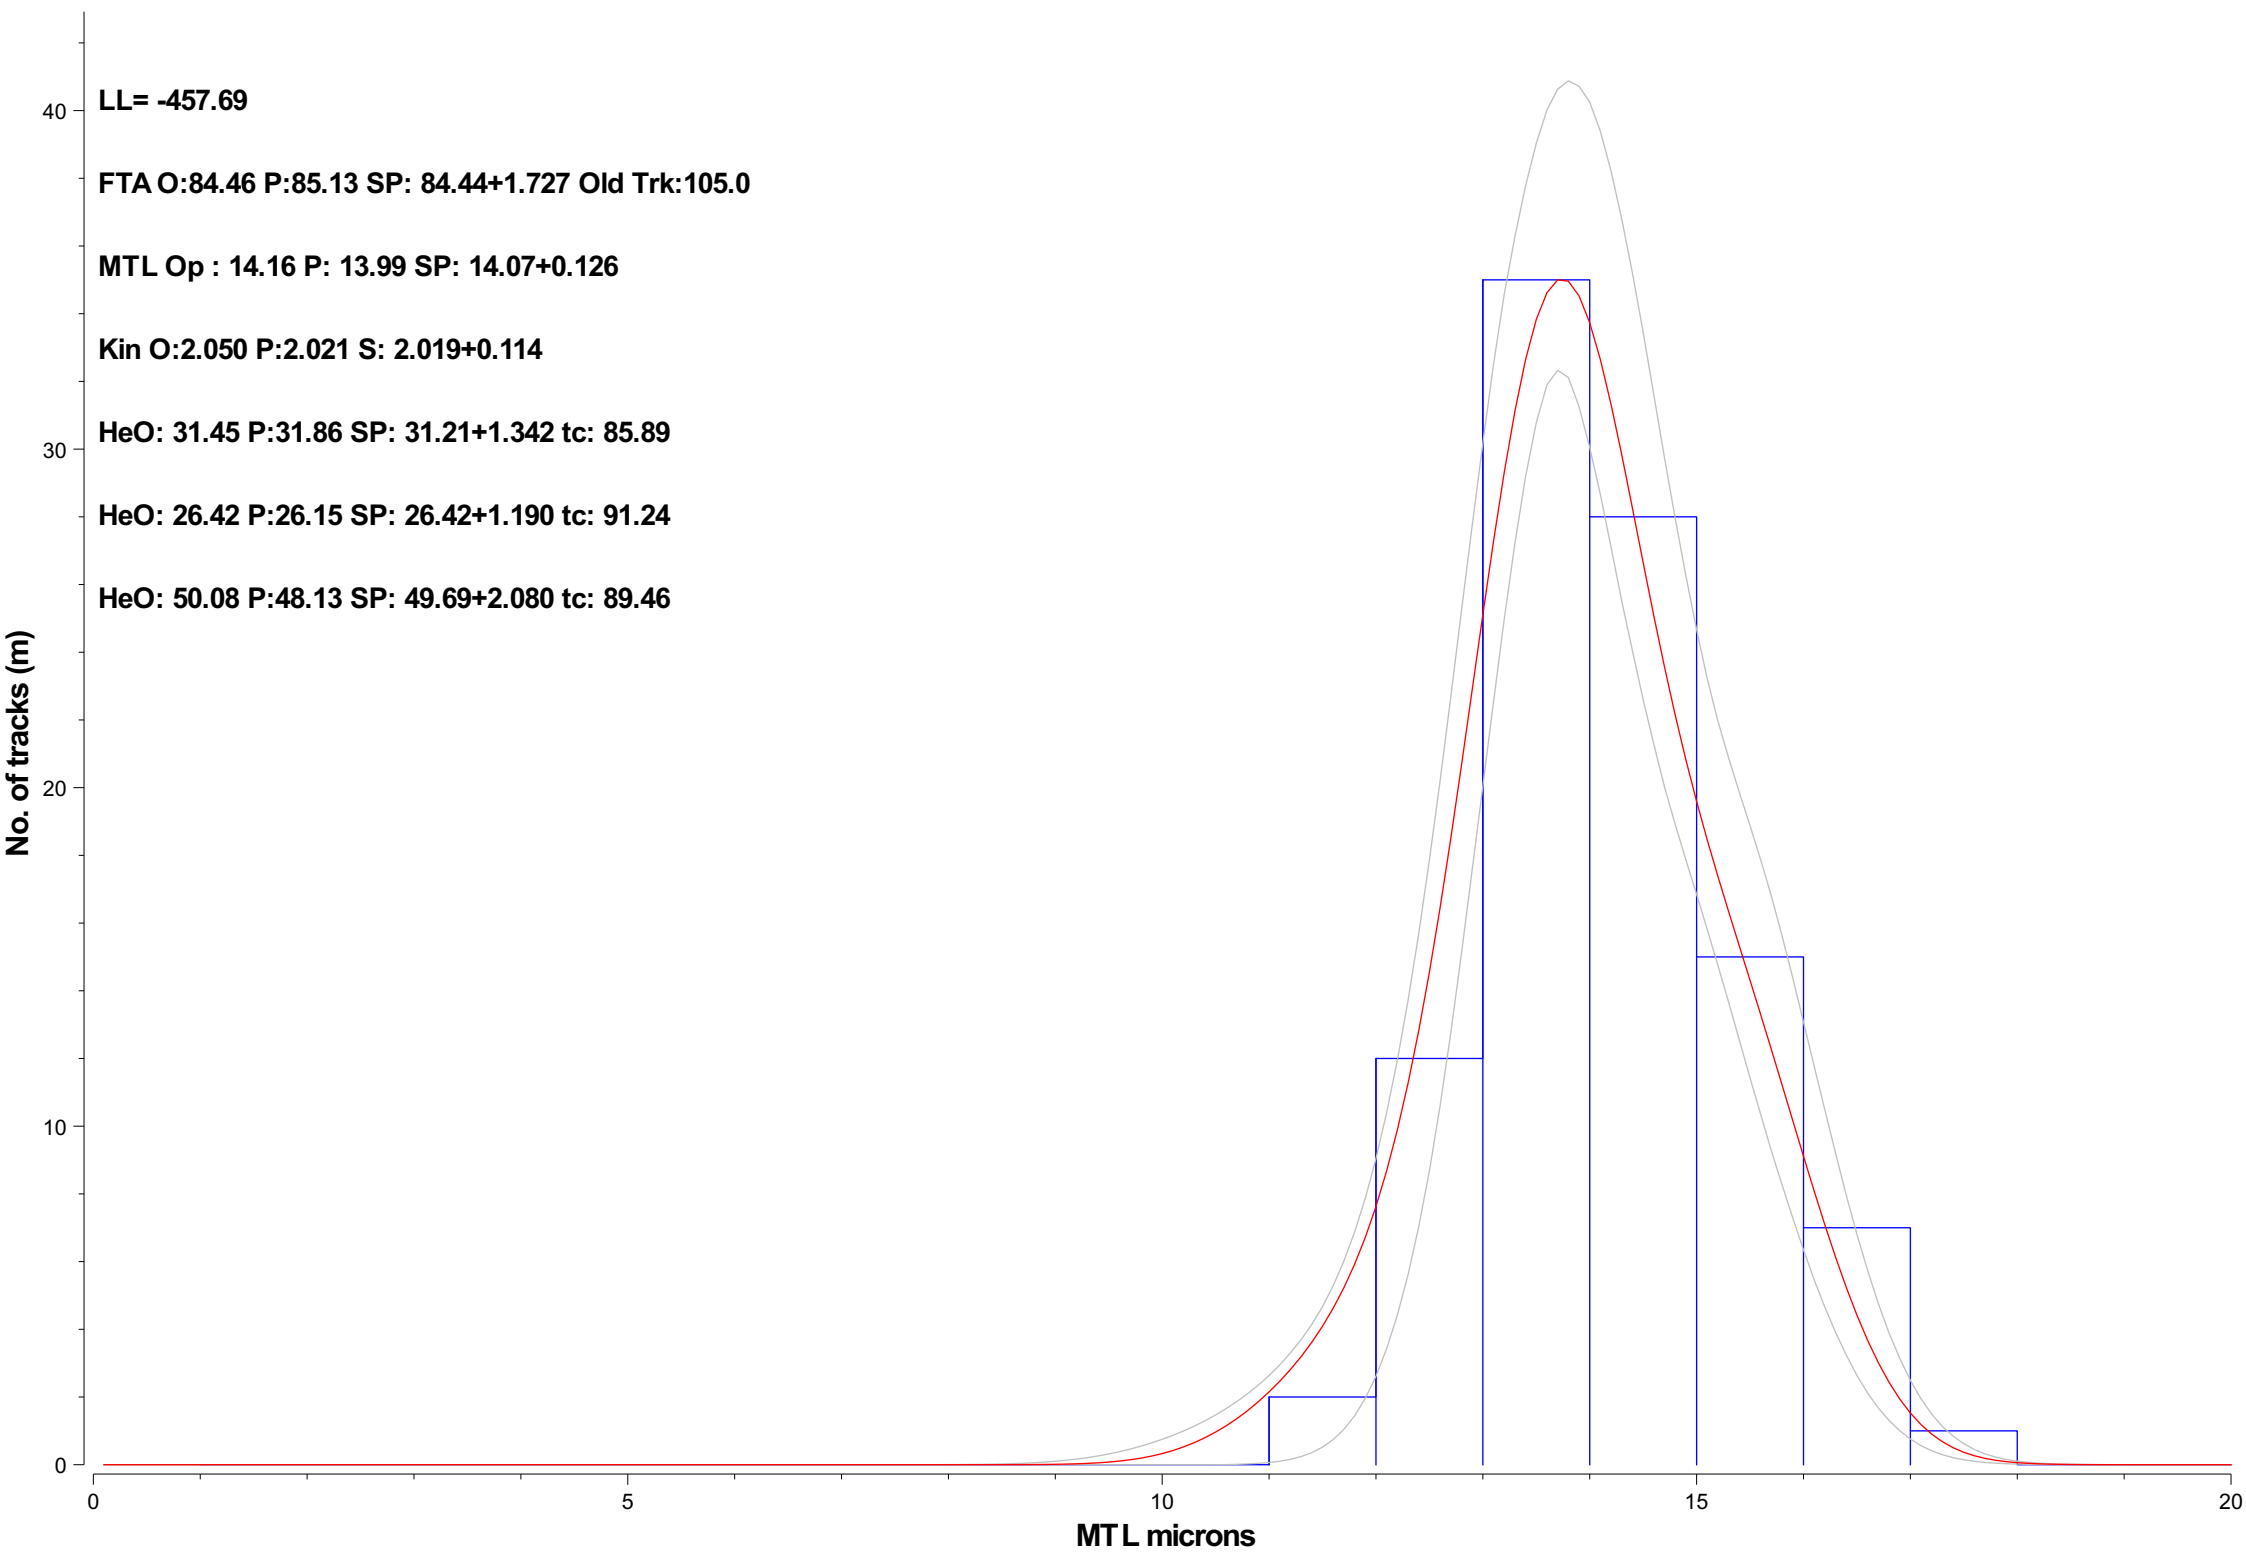

Supplement: Supplementary file 66 [file 1]

# Exercise4\_GROUPB-2\_3 : Max Like

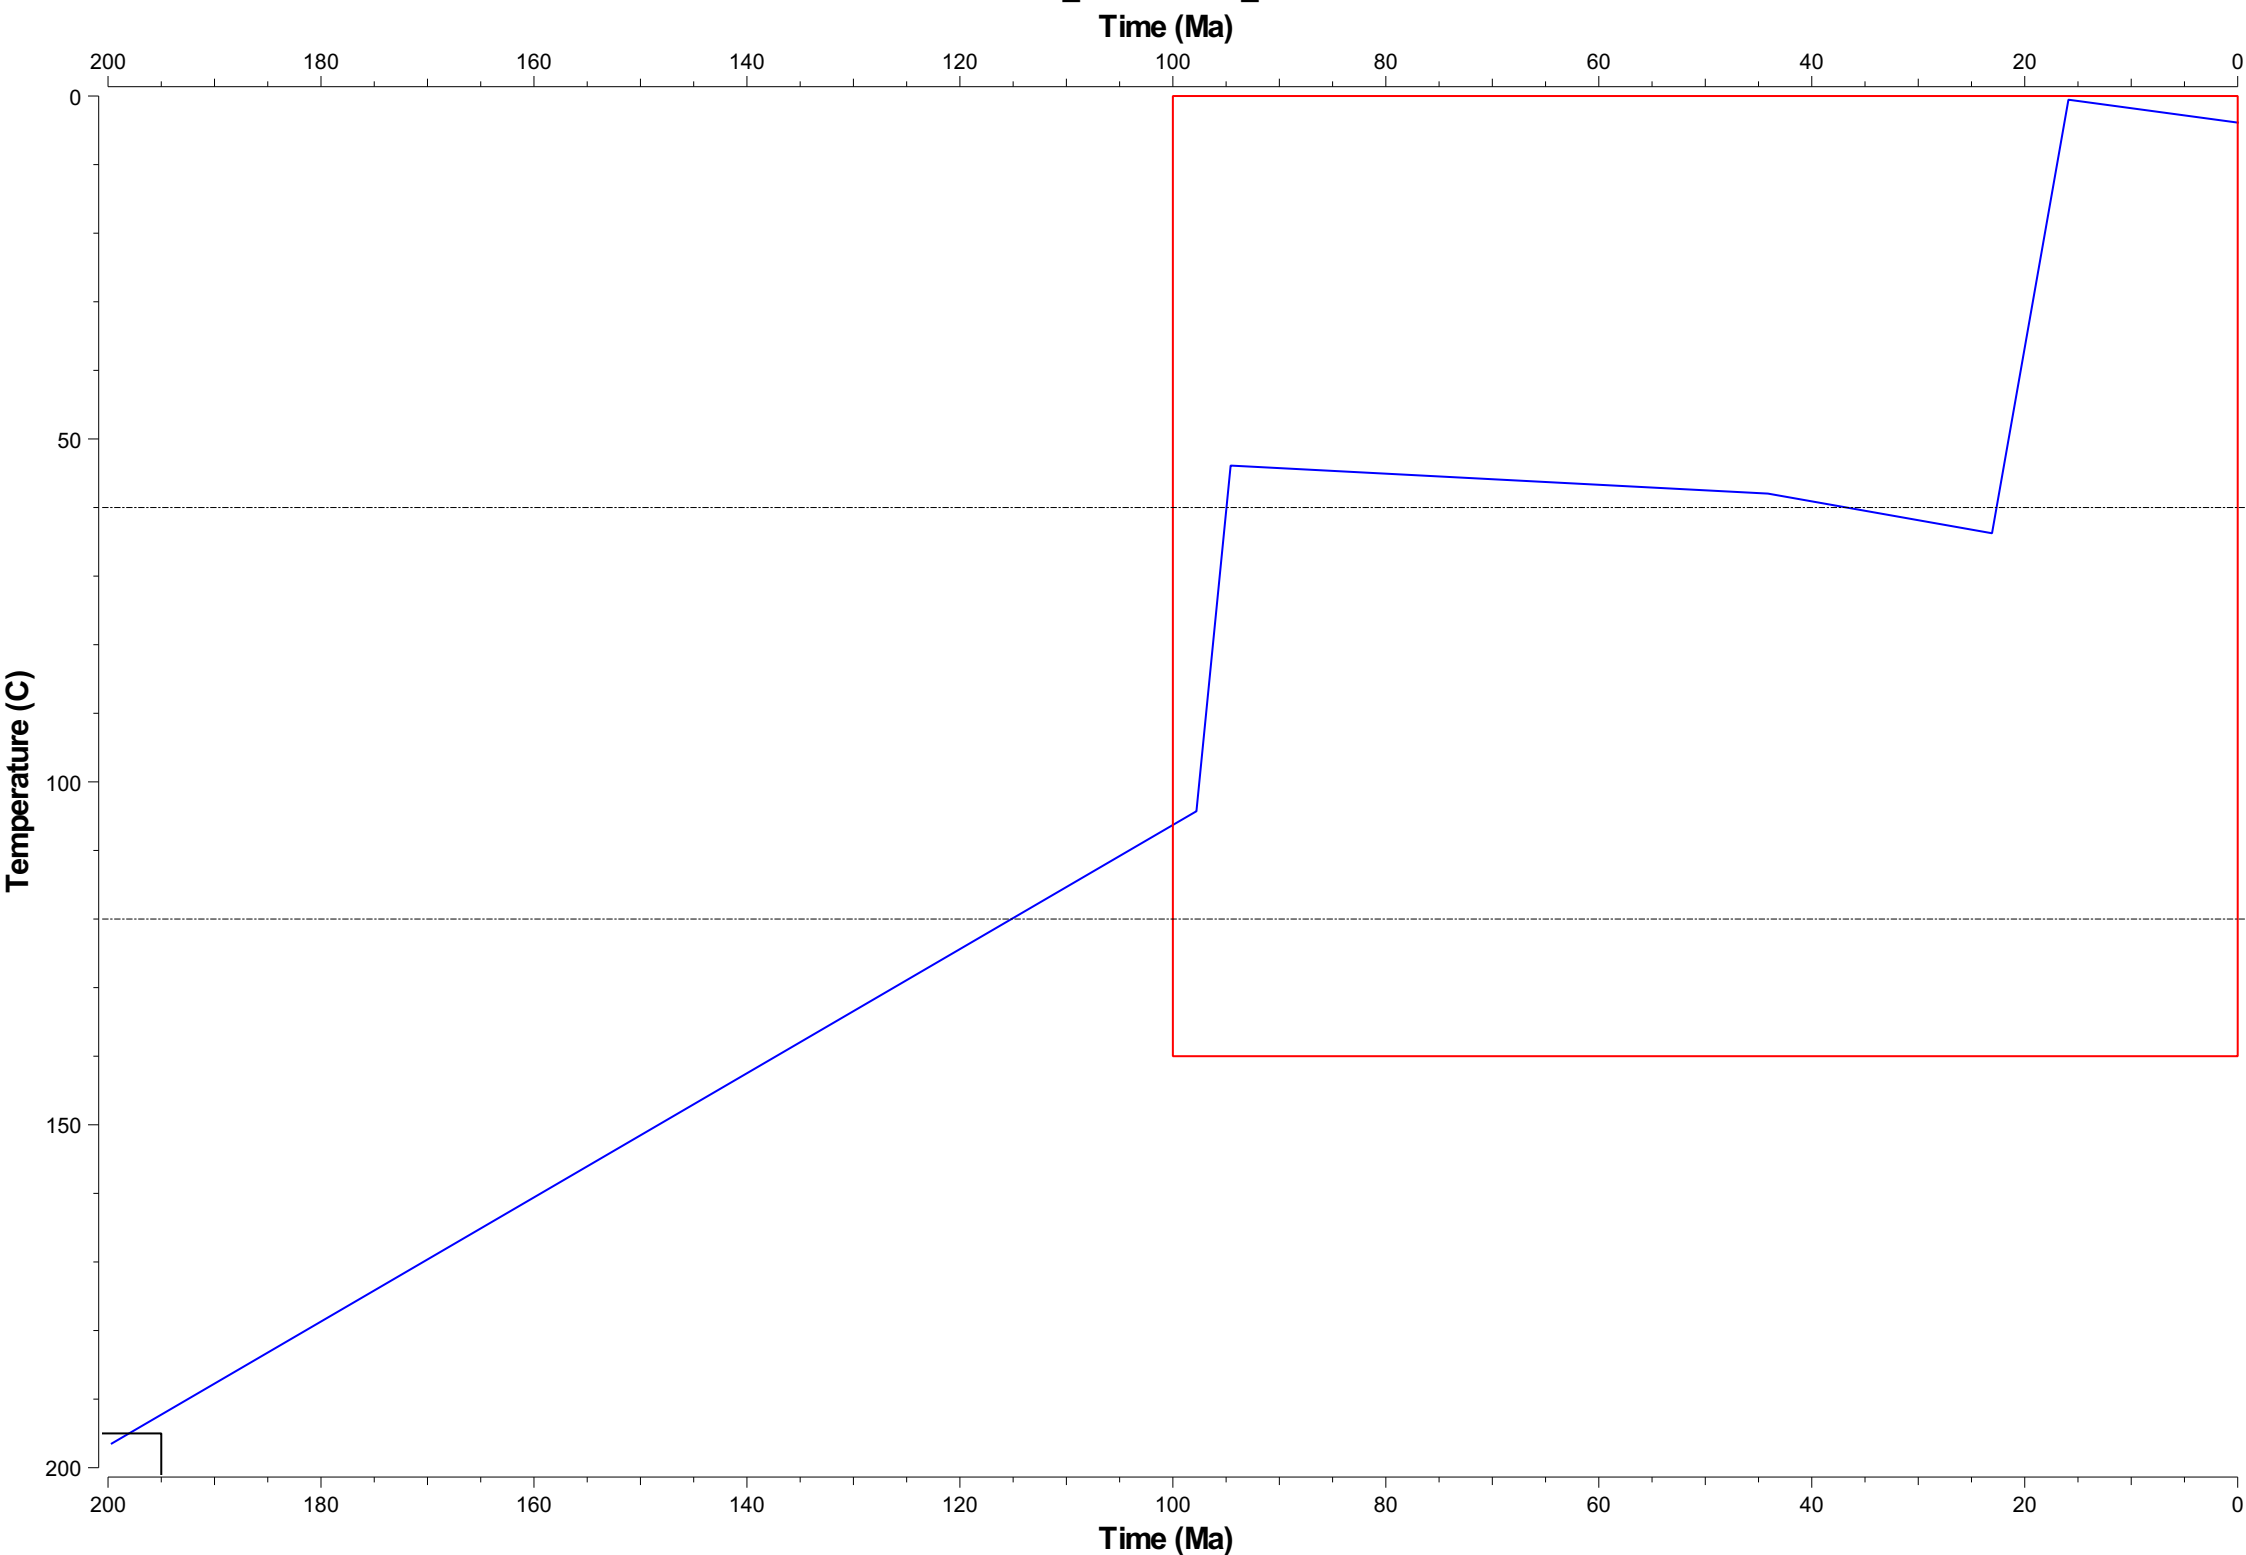

Supplement: Supplementary file 67 [file 1]

# Exercise4\_GROUPB-1\_3

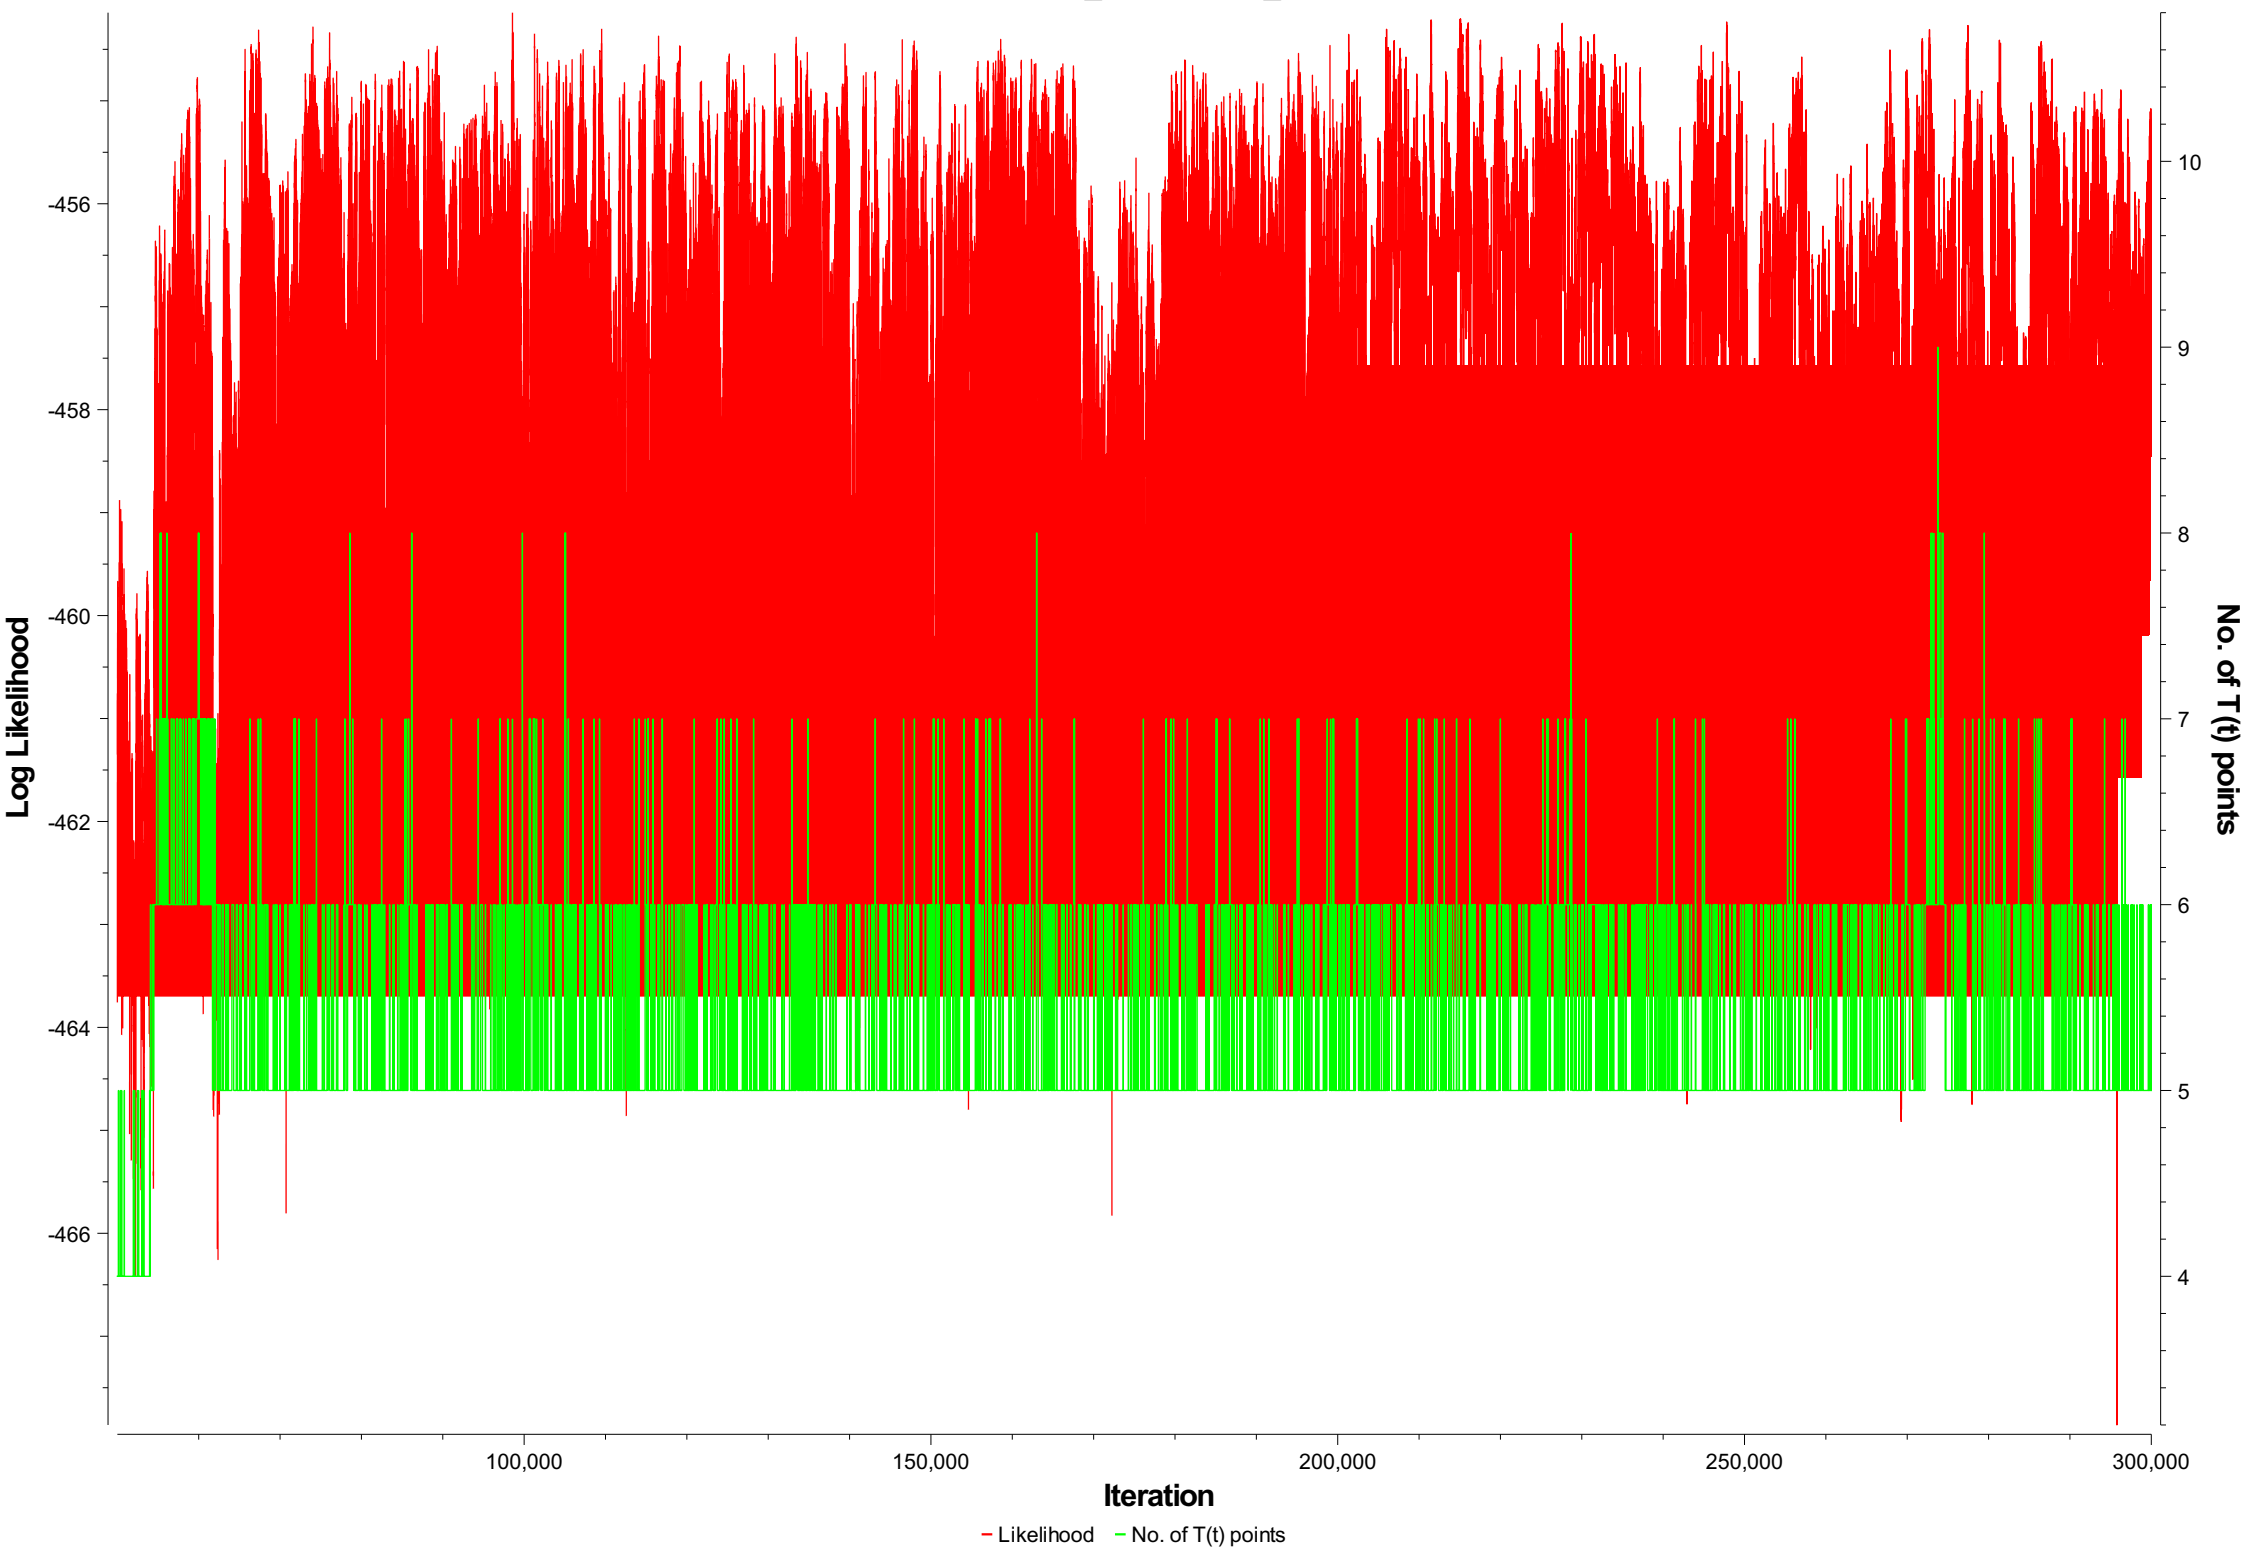

Supplement: Supplementary file 68 [file 1]

# Exercise4\_GROUPD-2\_3 : EXPECTED

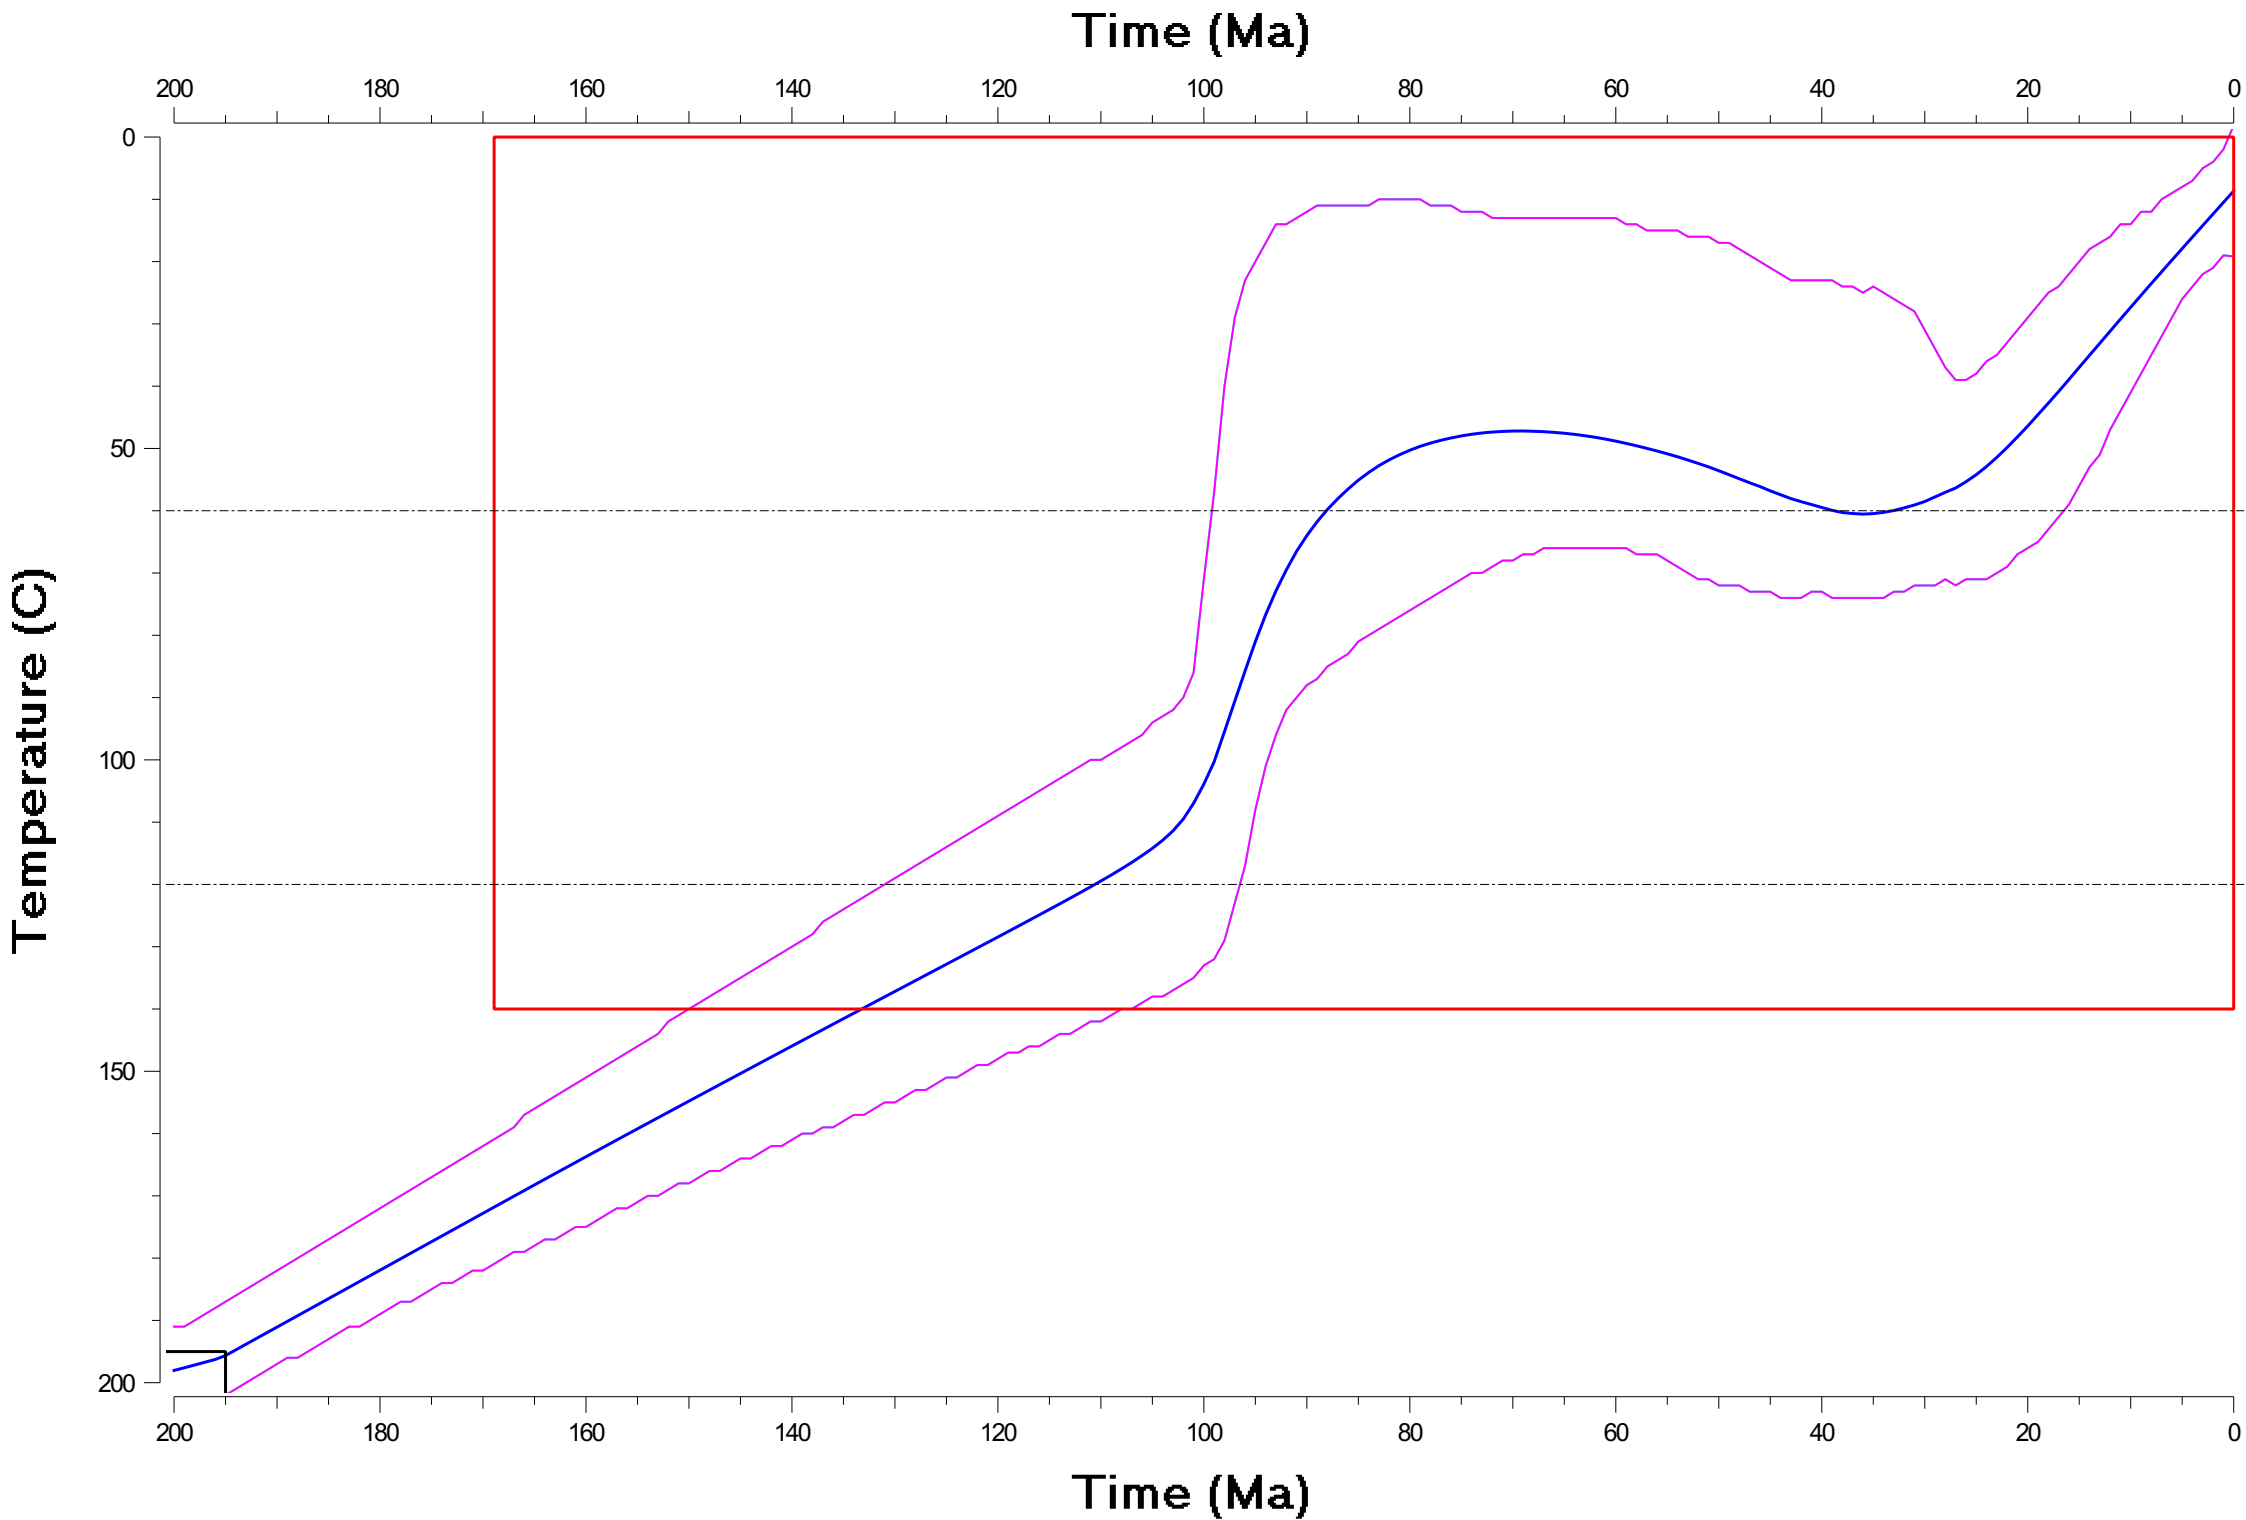

Supplement: Supplementary file 69 [file 1]

# Exercise4\_GROUPA-2\_3\_Exercise4\_InputData.txt 10.00m : Expected

No. of tracks (m)

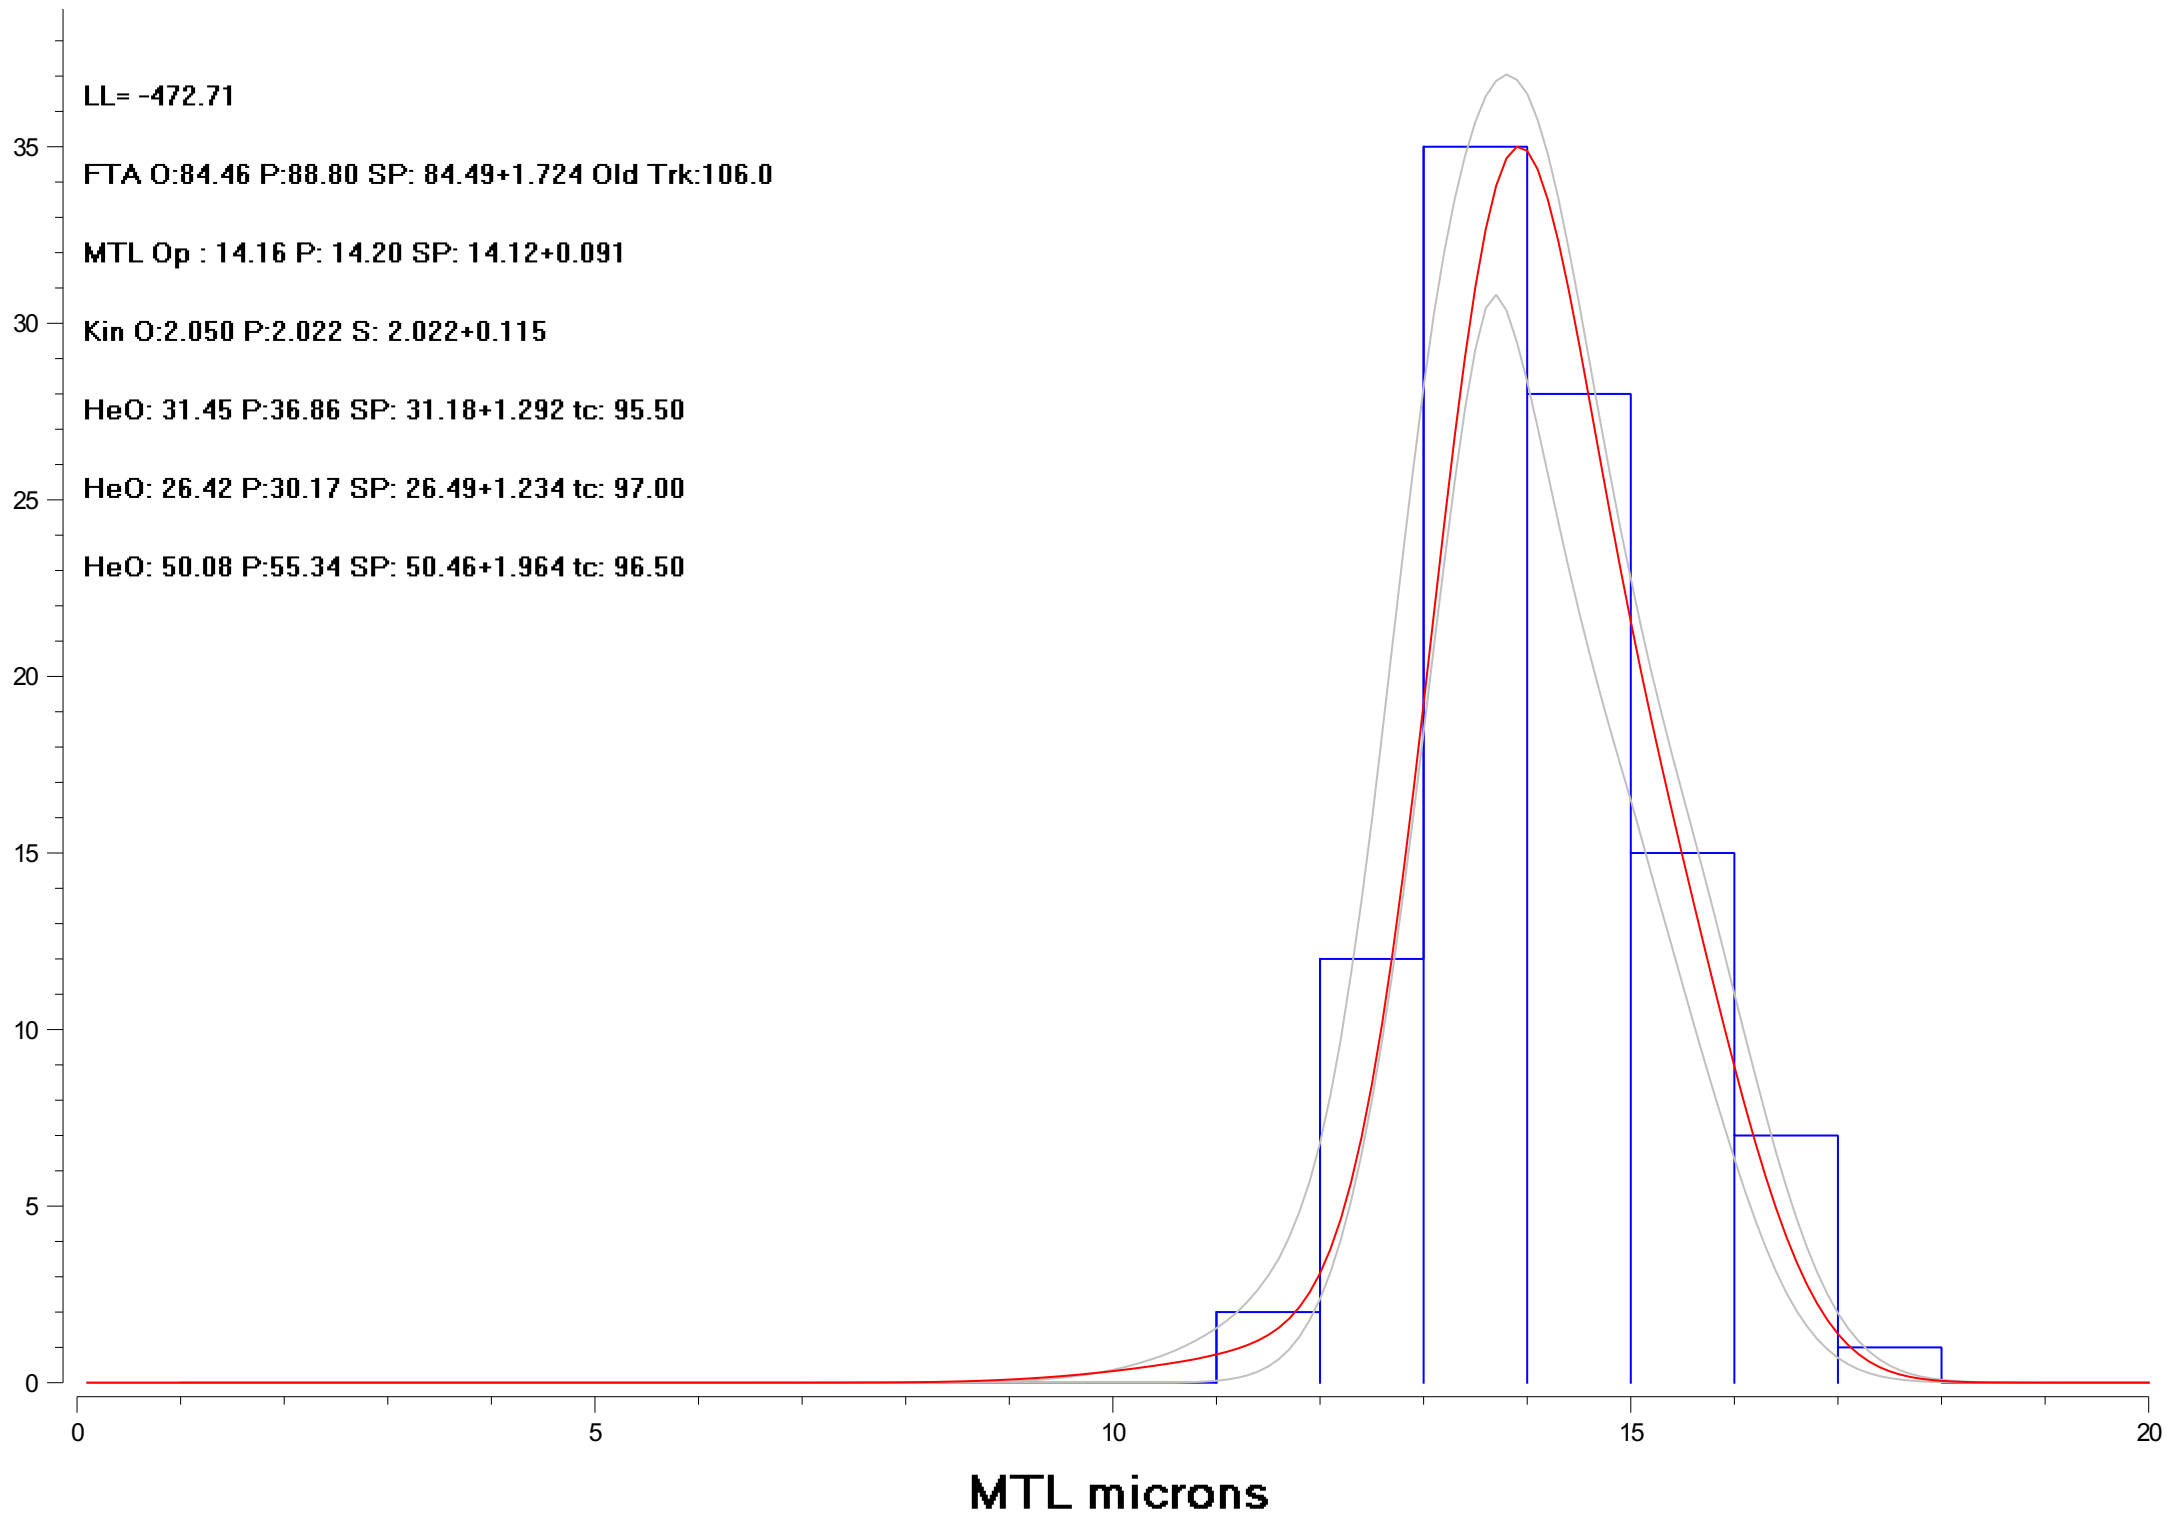

Supplement: Supplementary file 70 [file 1]

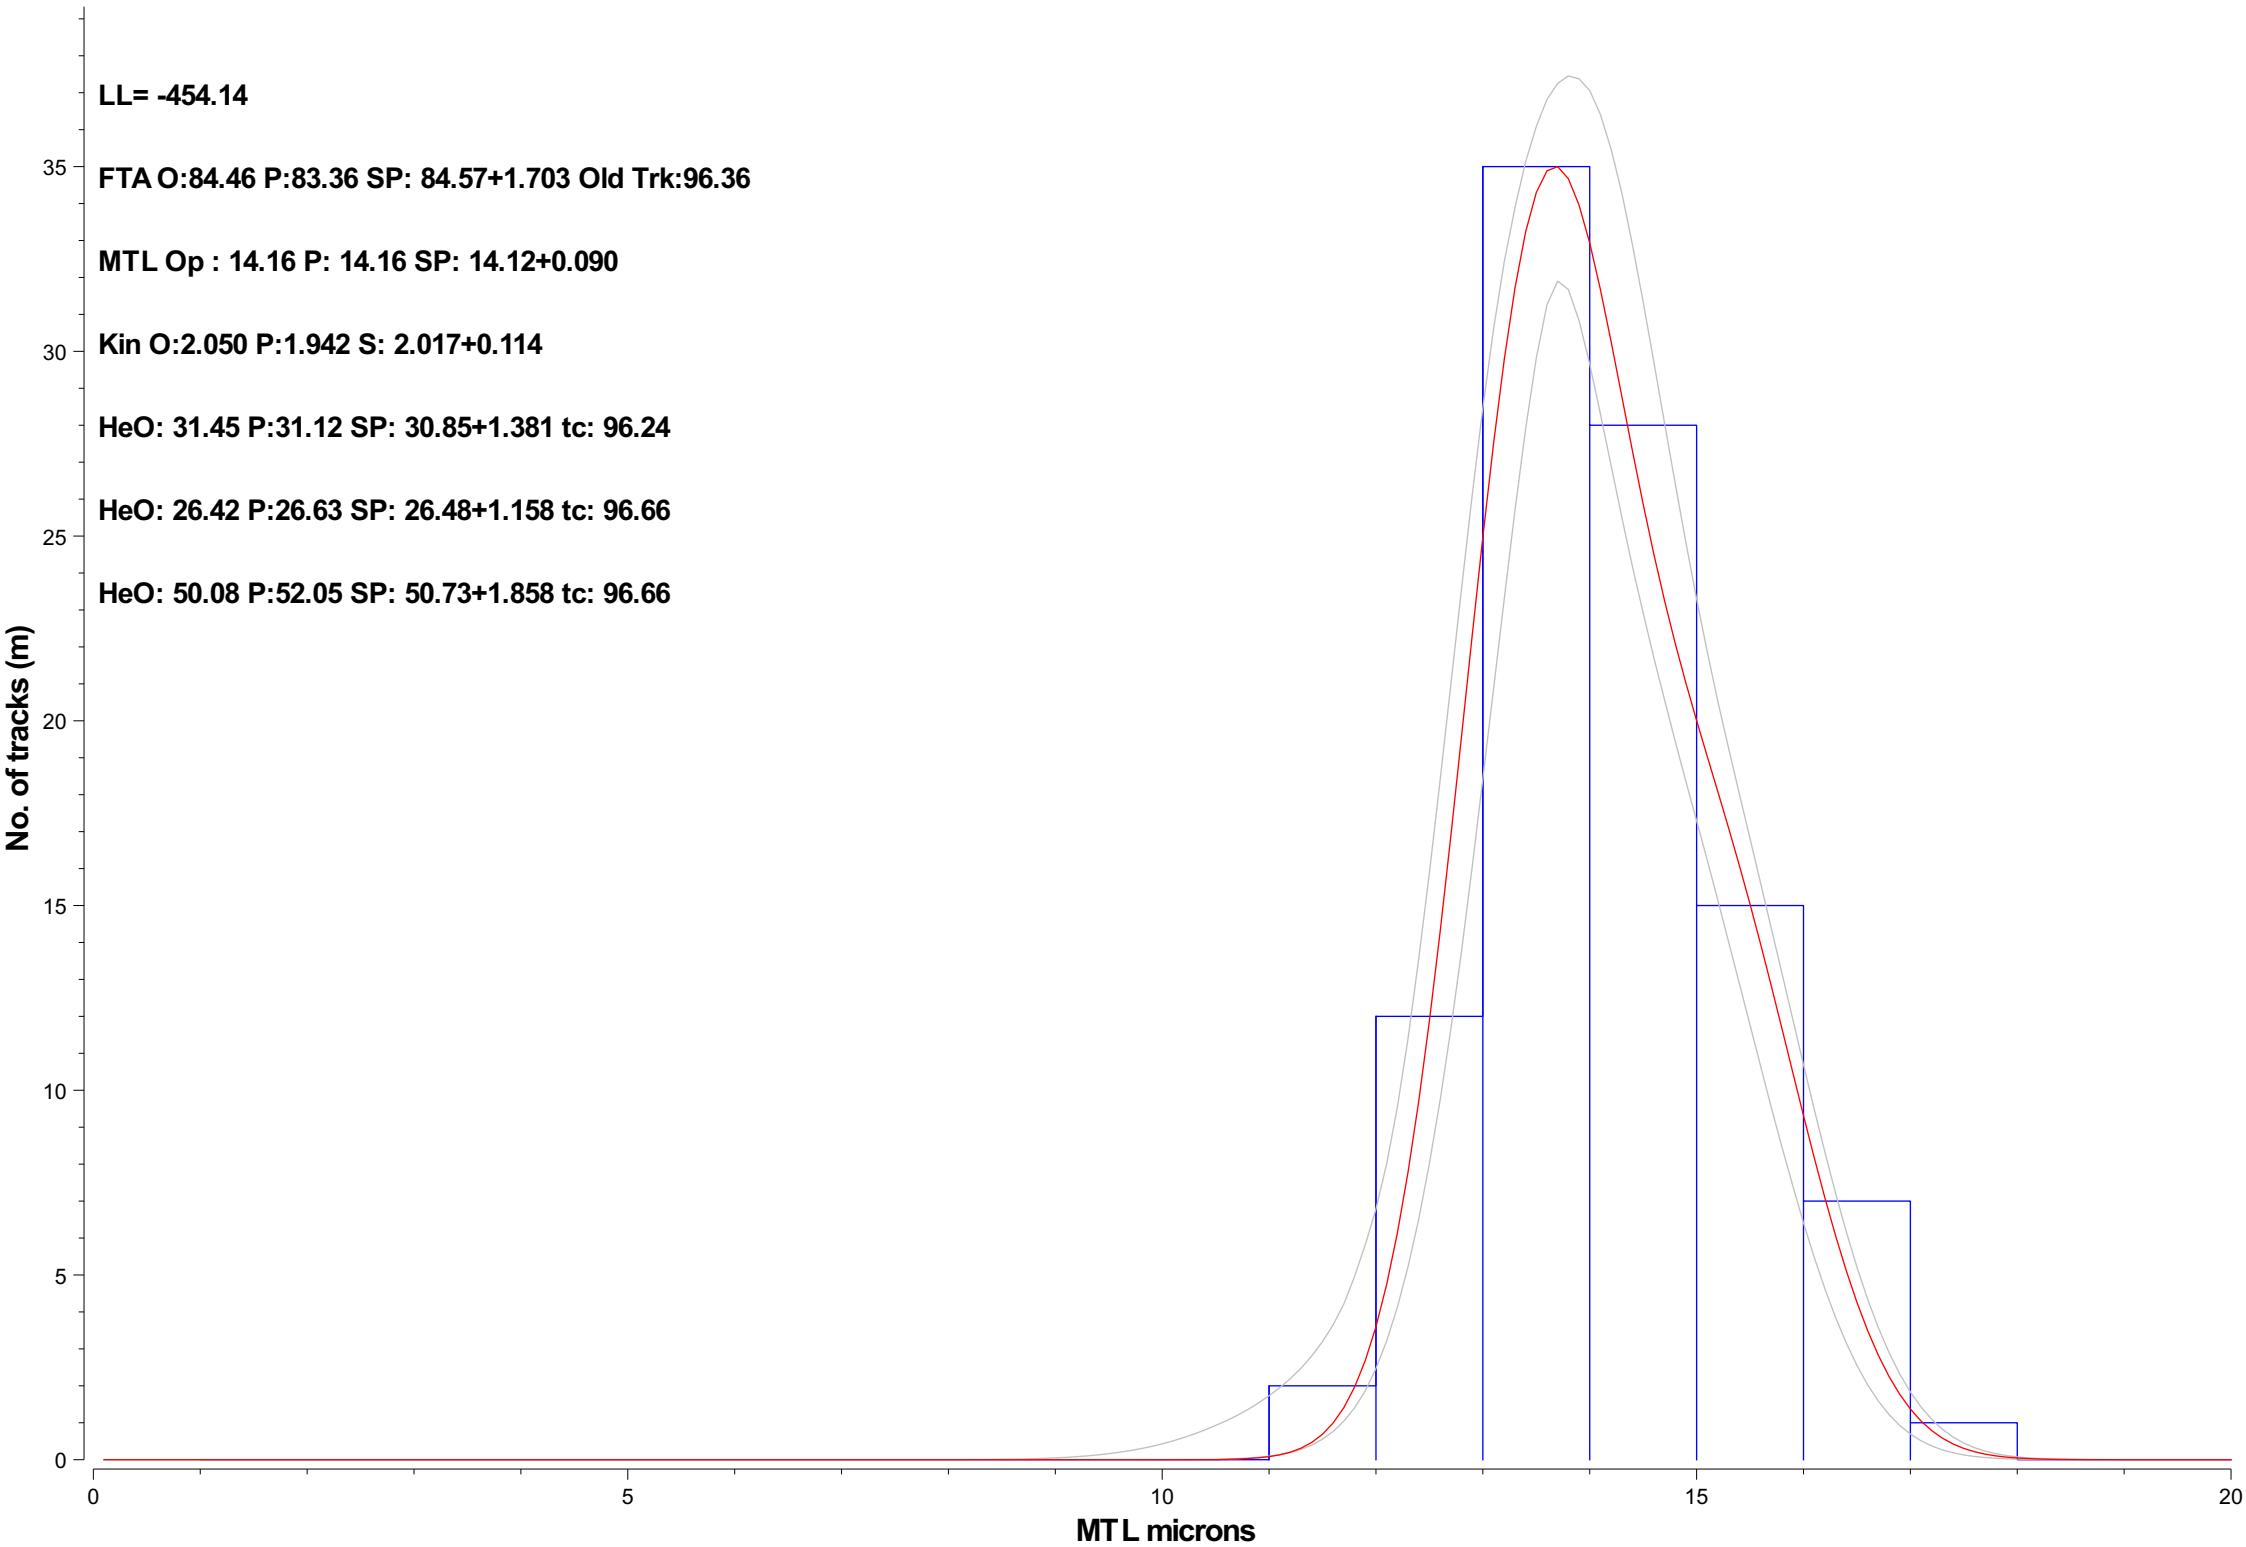

Supplement: Supplementary file 71 [file 1]

# Exercise4\_GROUPD-2\_3

Log Posterior

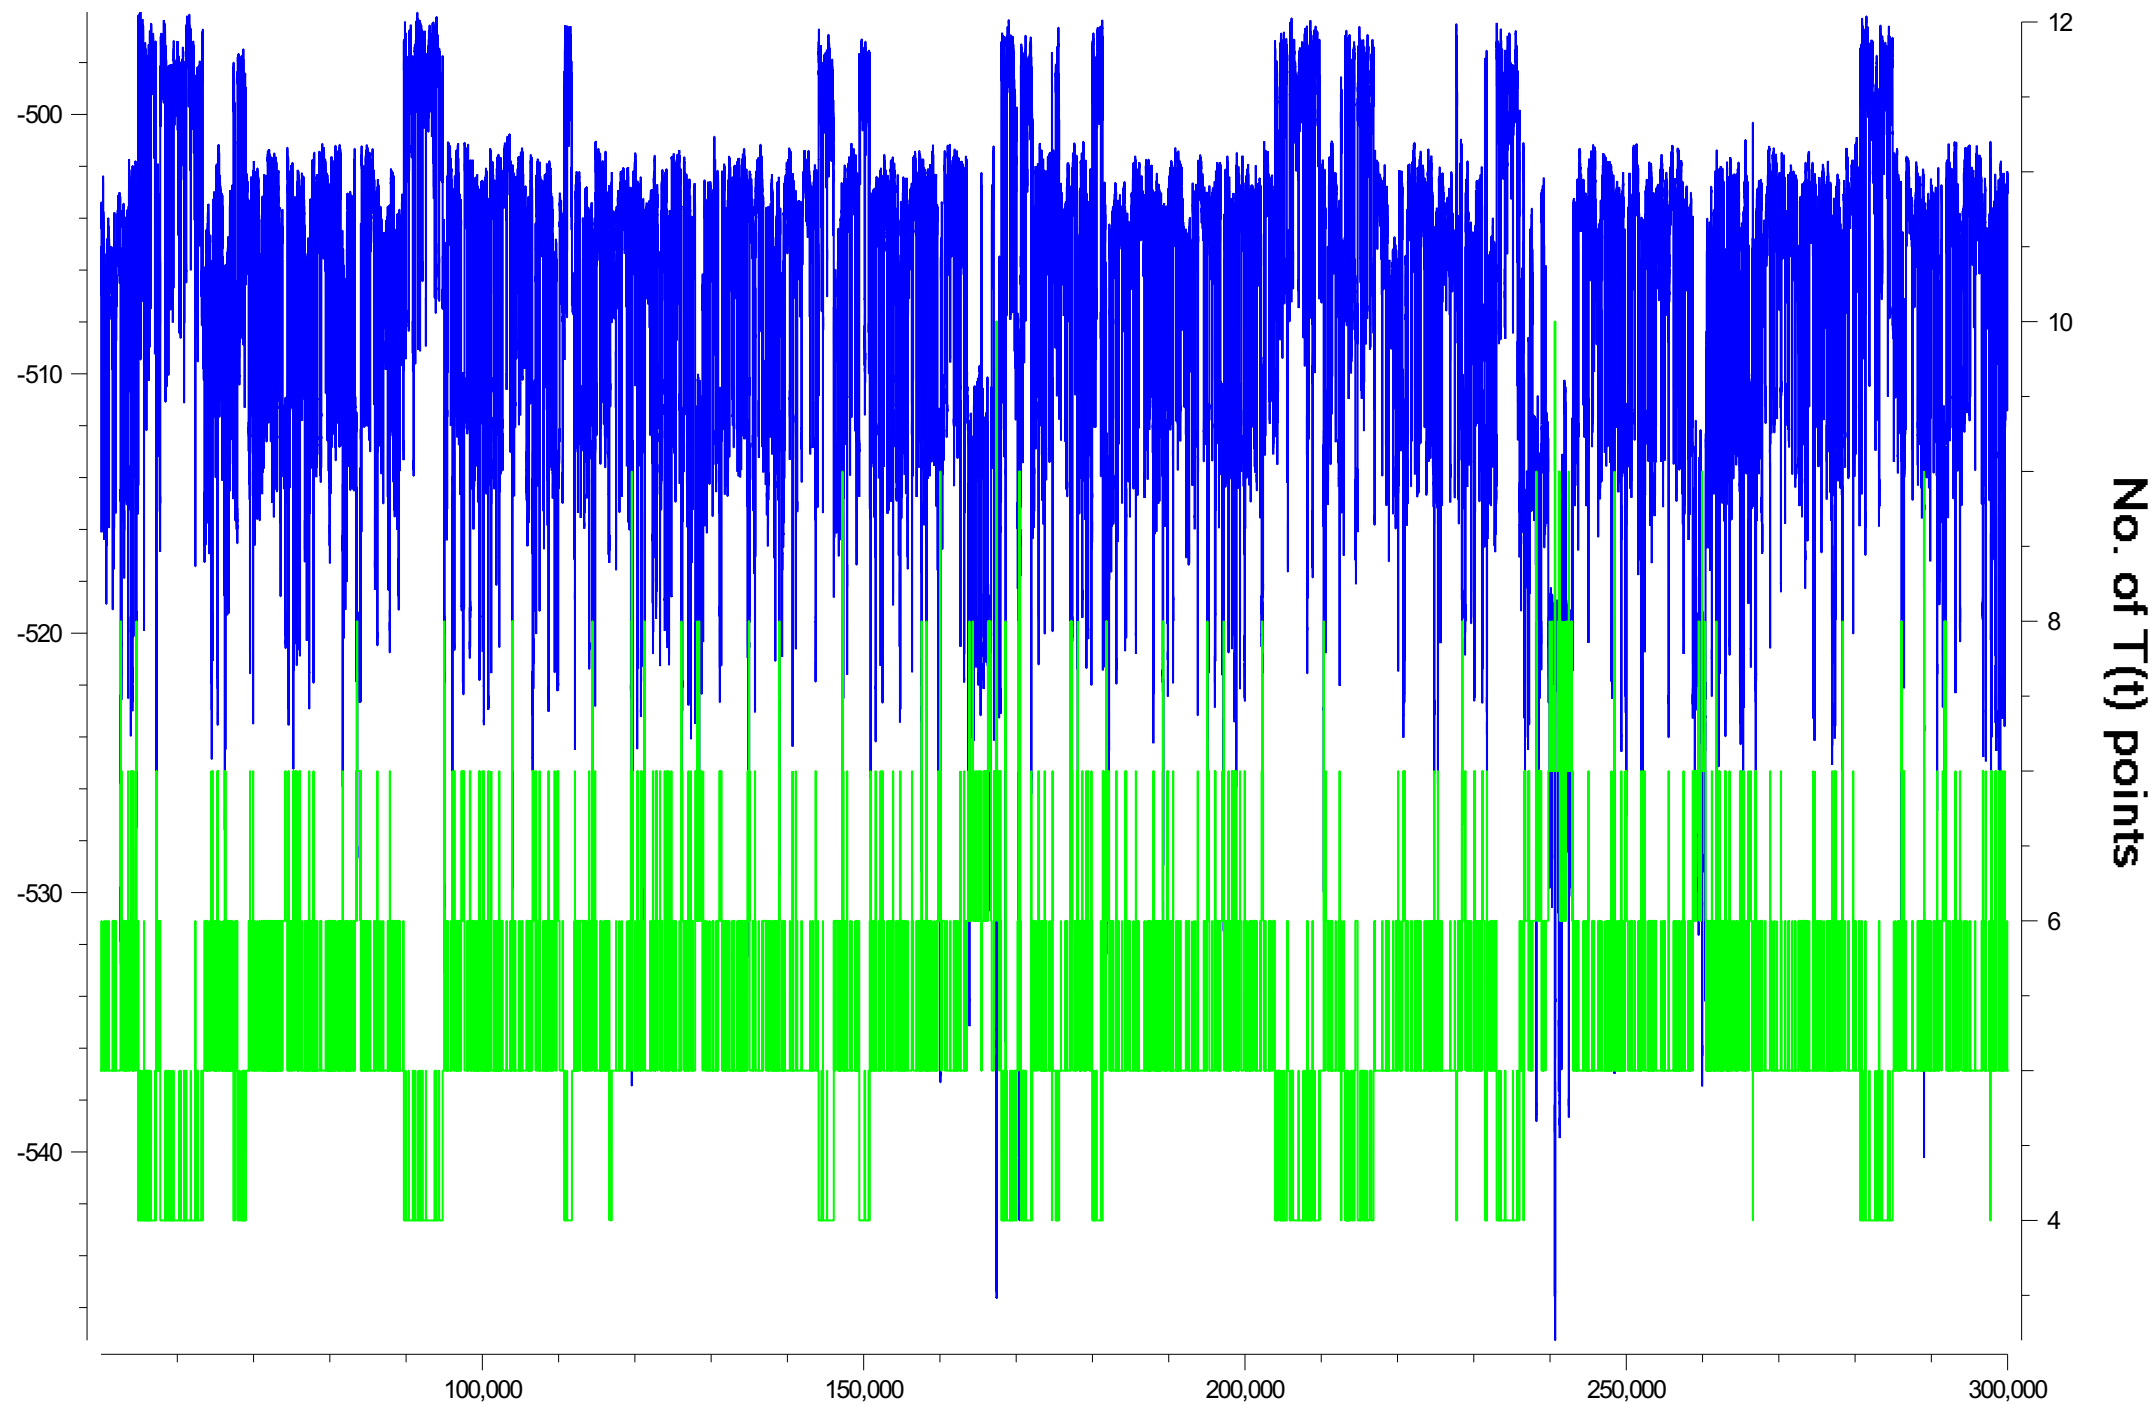

No. of  $T(t)$  points

Iteration

— Posterior — No. of  $T(t)$  points

Supplement: Supplementary file 72 [file 1]

# Exercise4\_GROUPD-2\_3\_Exercise4\_InputData.txt 10.00m : Max Post

No. of tracks (m)

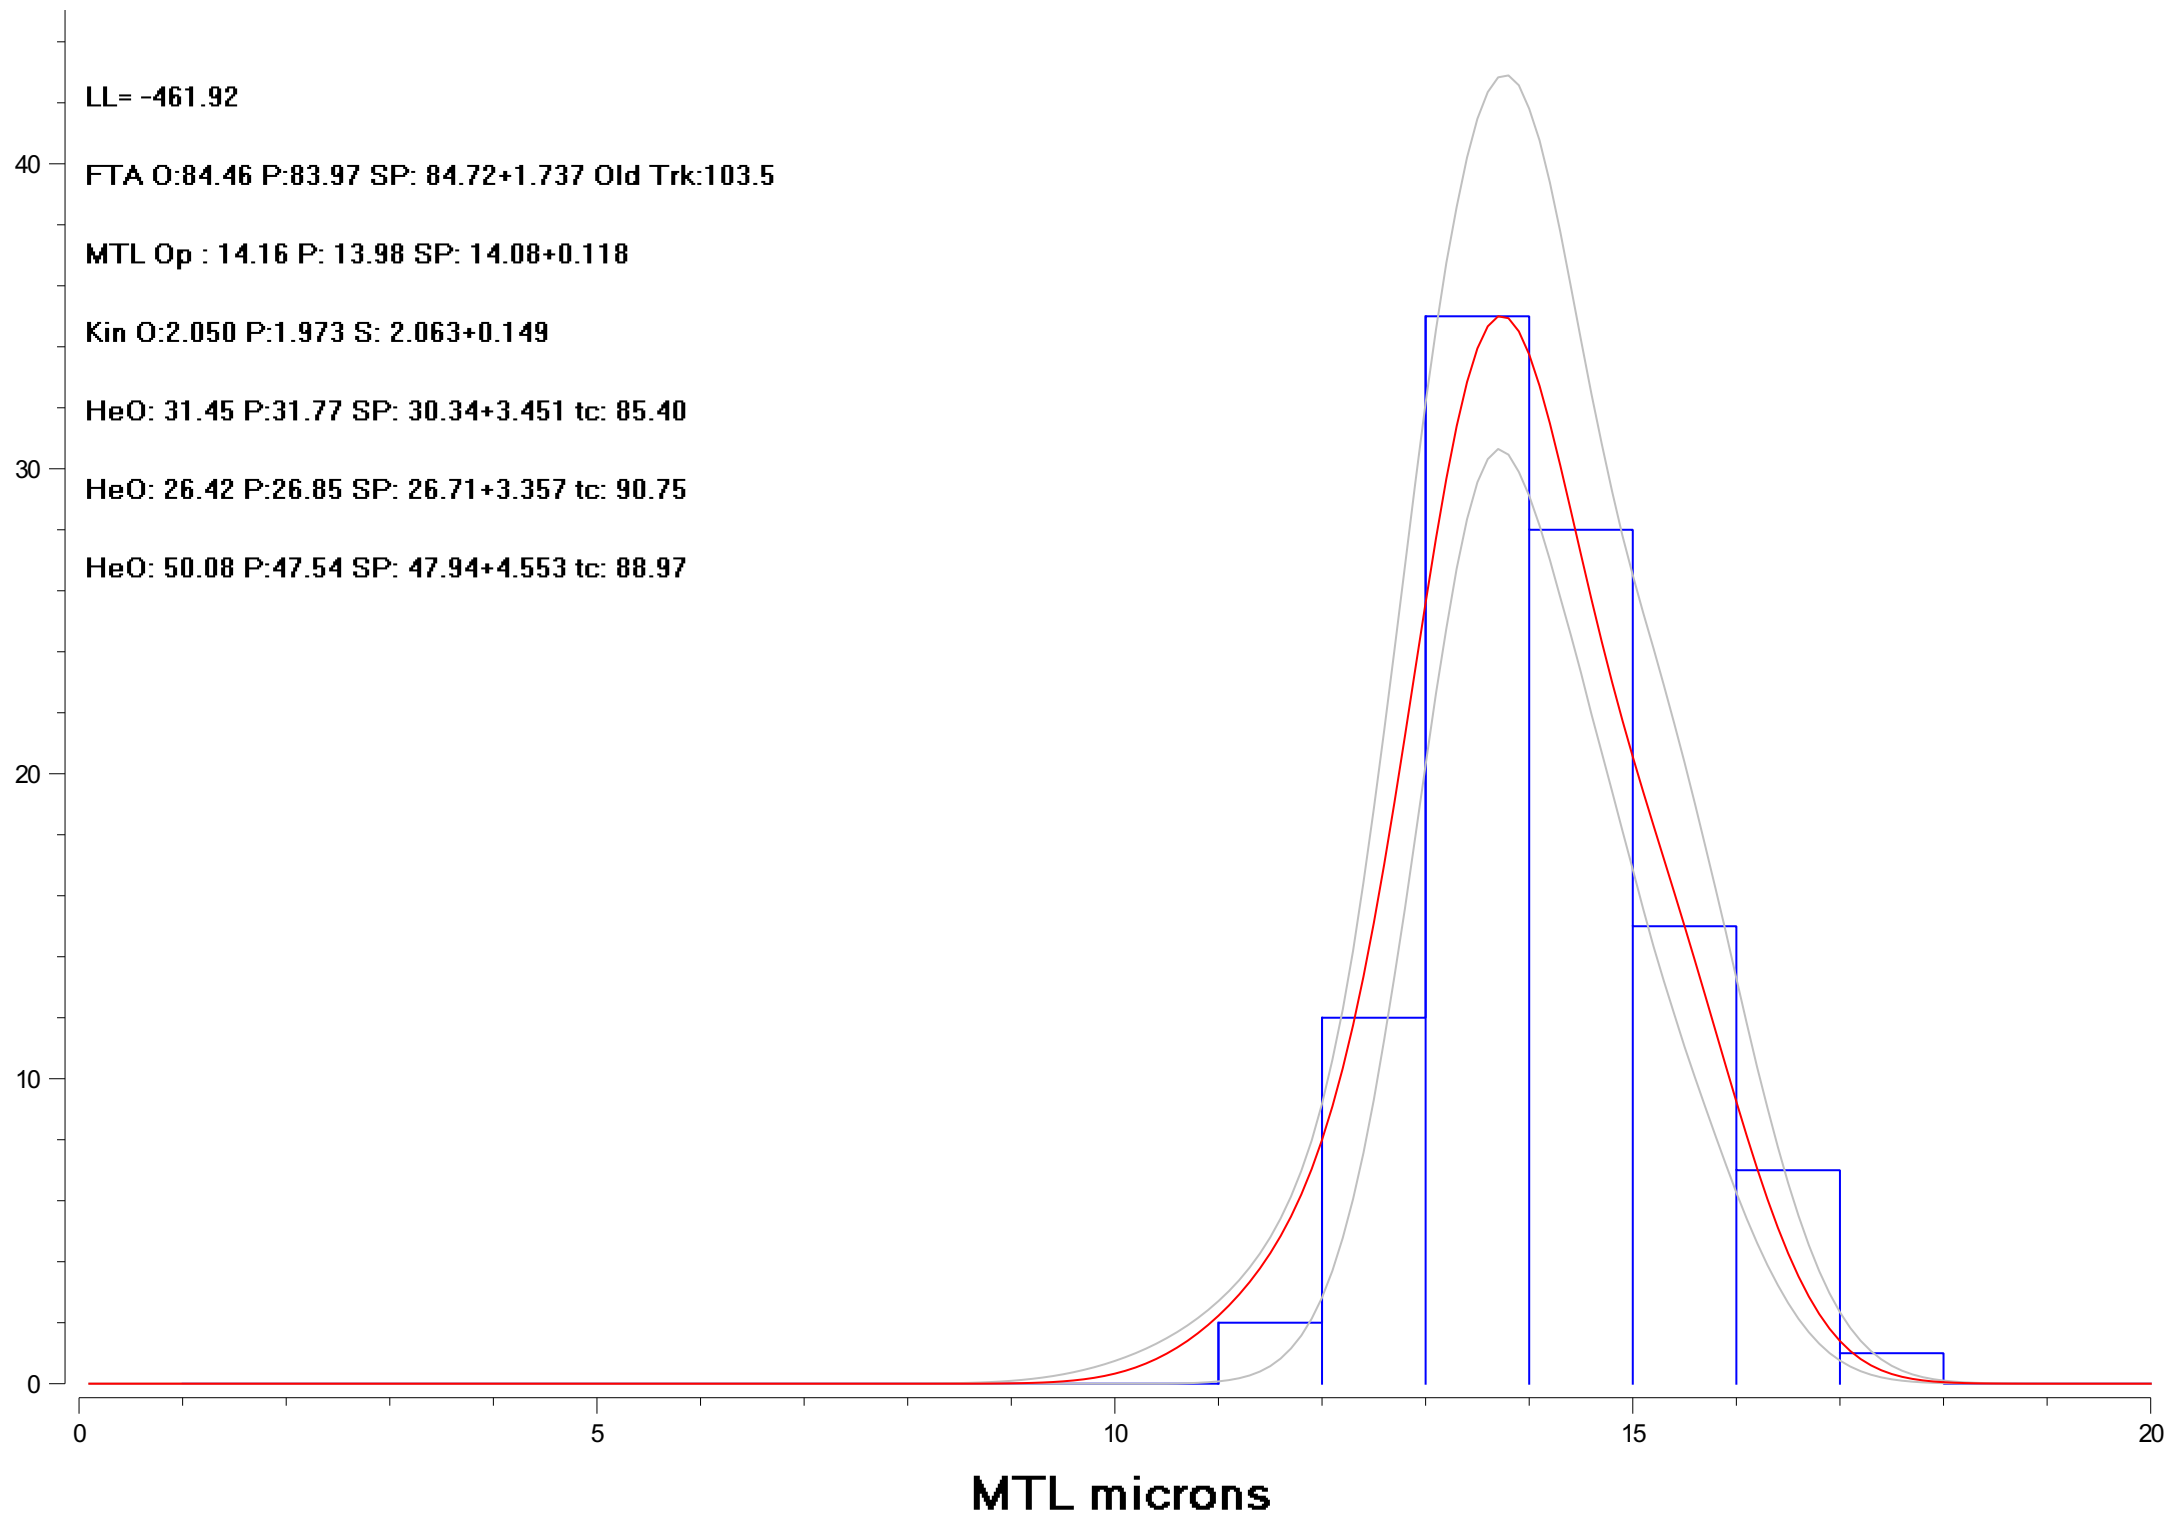

Supplement: Supplementary file 73 [file 1]

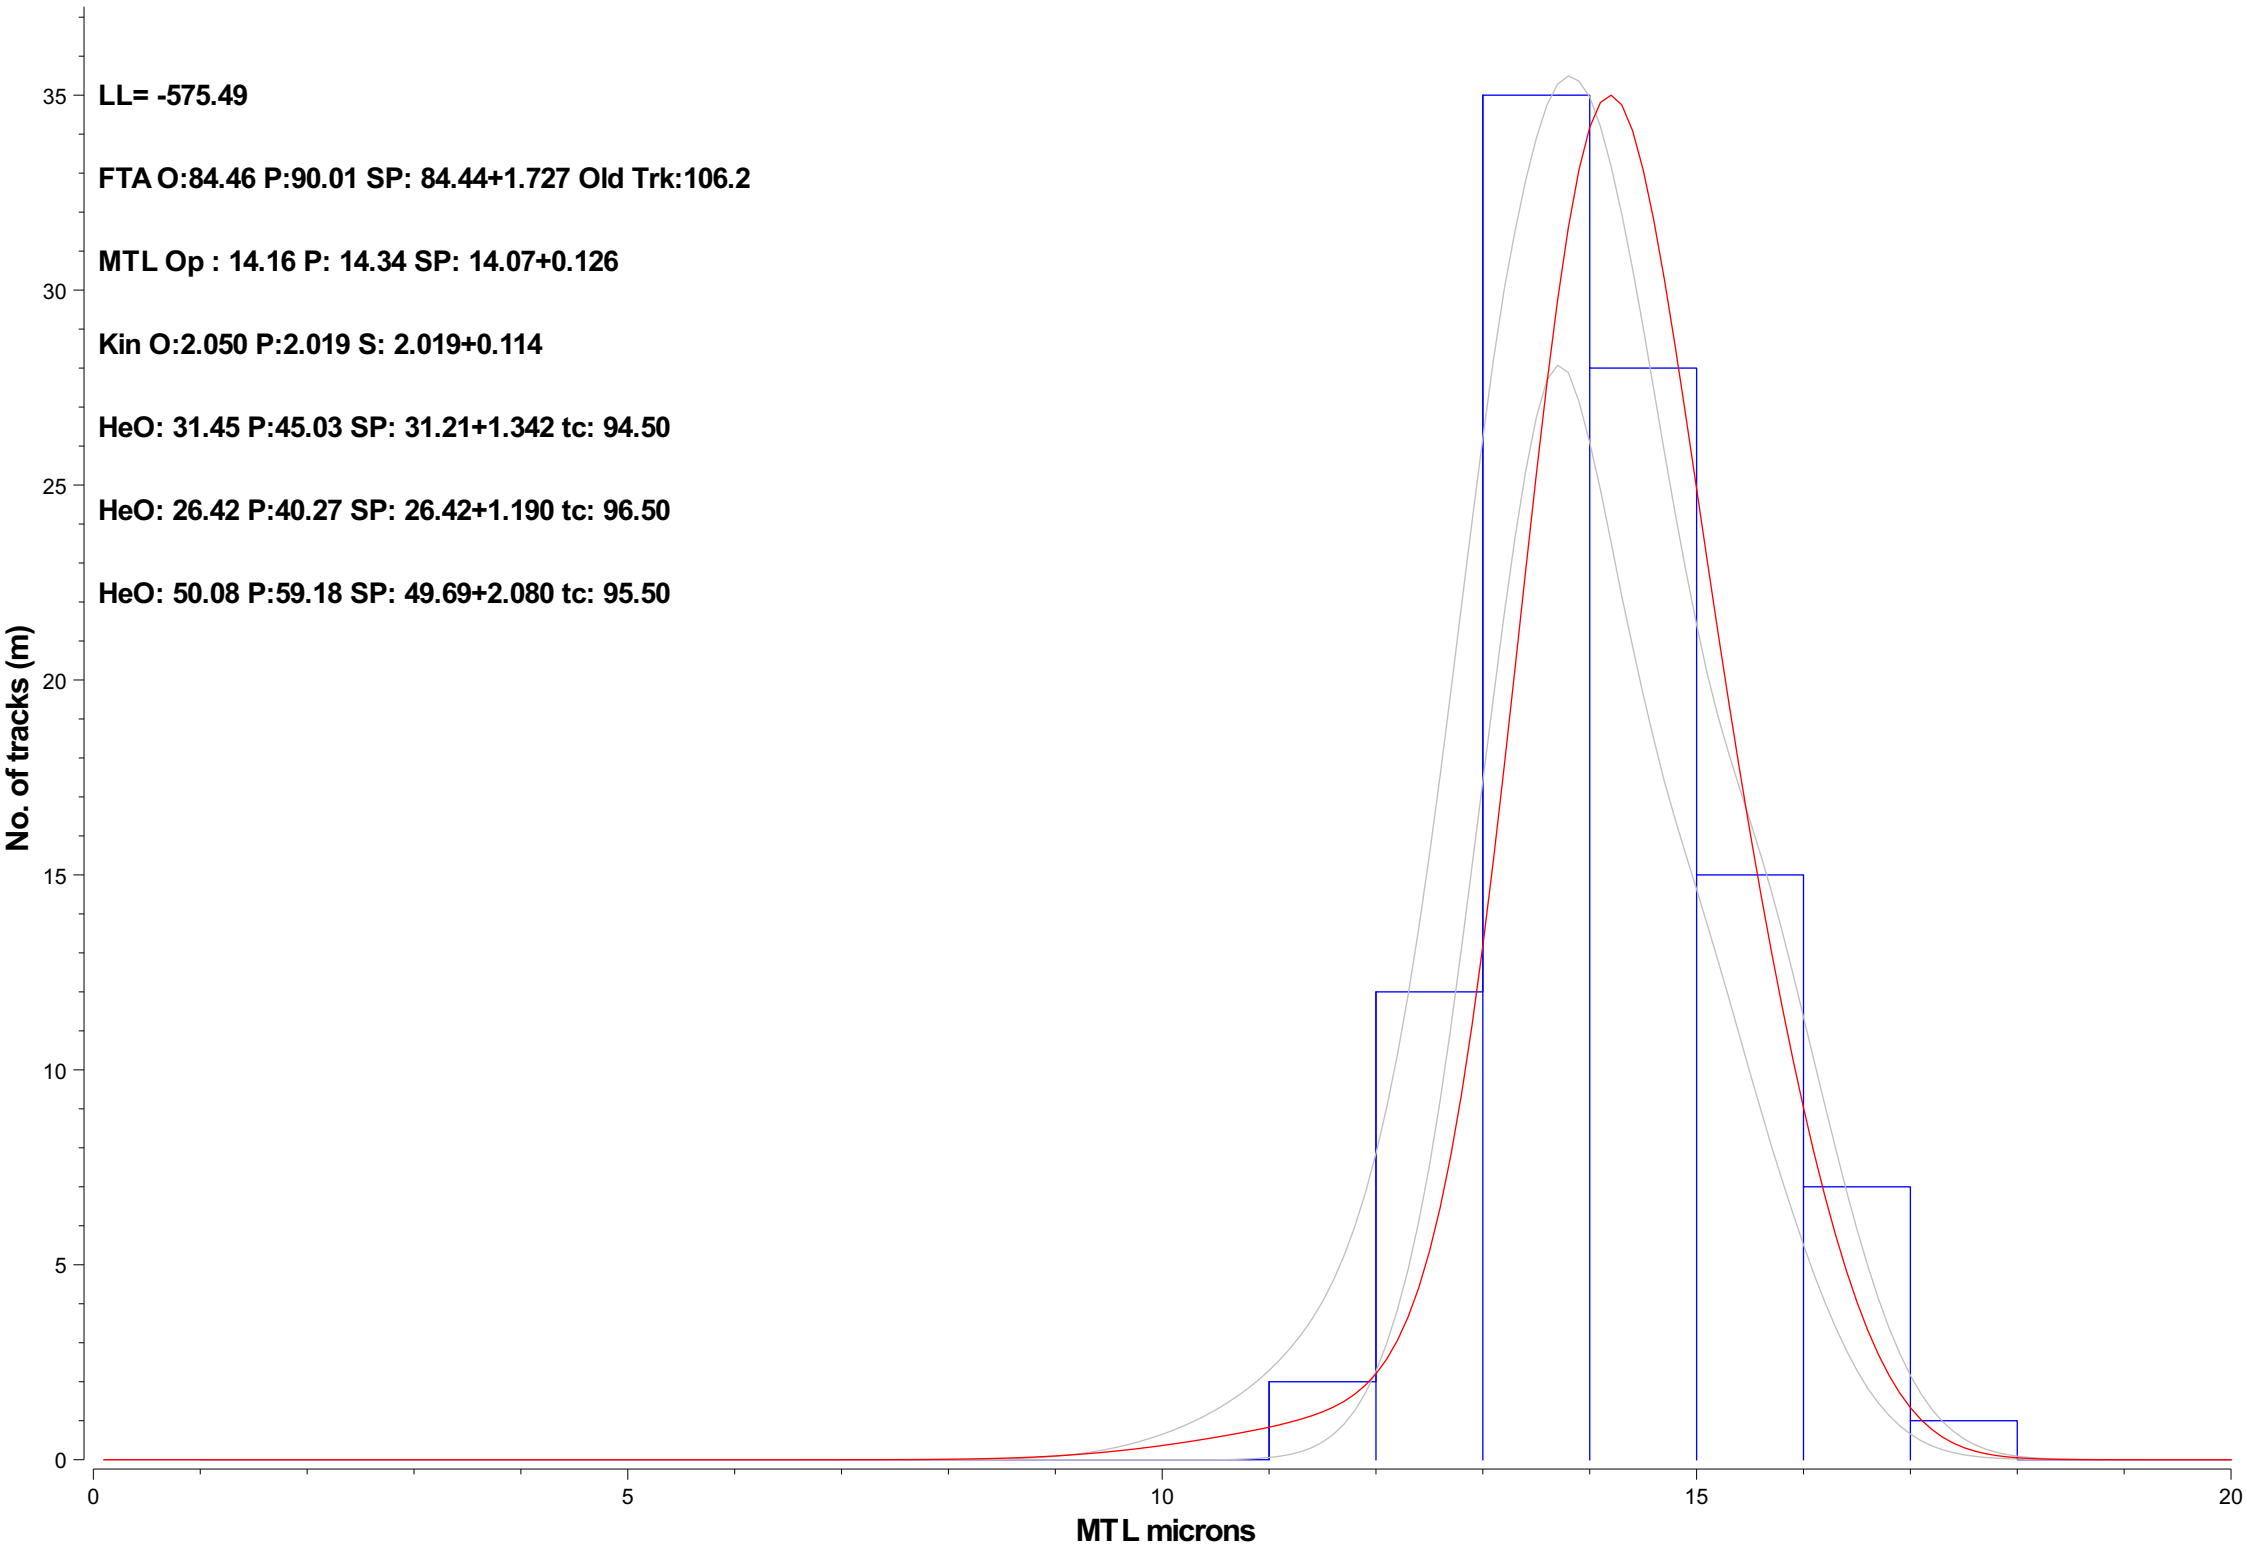

Supplement: Supplementary file 74 [file 1]

# Exercise4\_GROUPA-1\_3

Log Likelihood

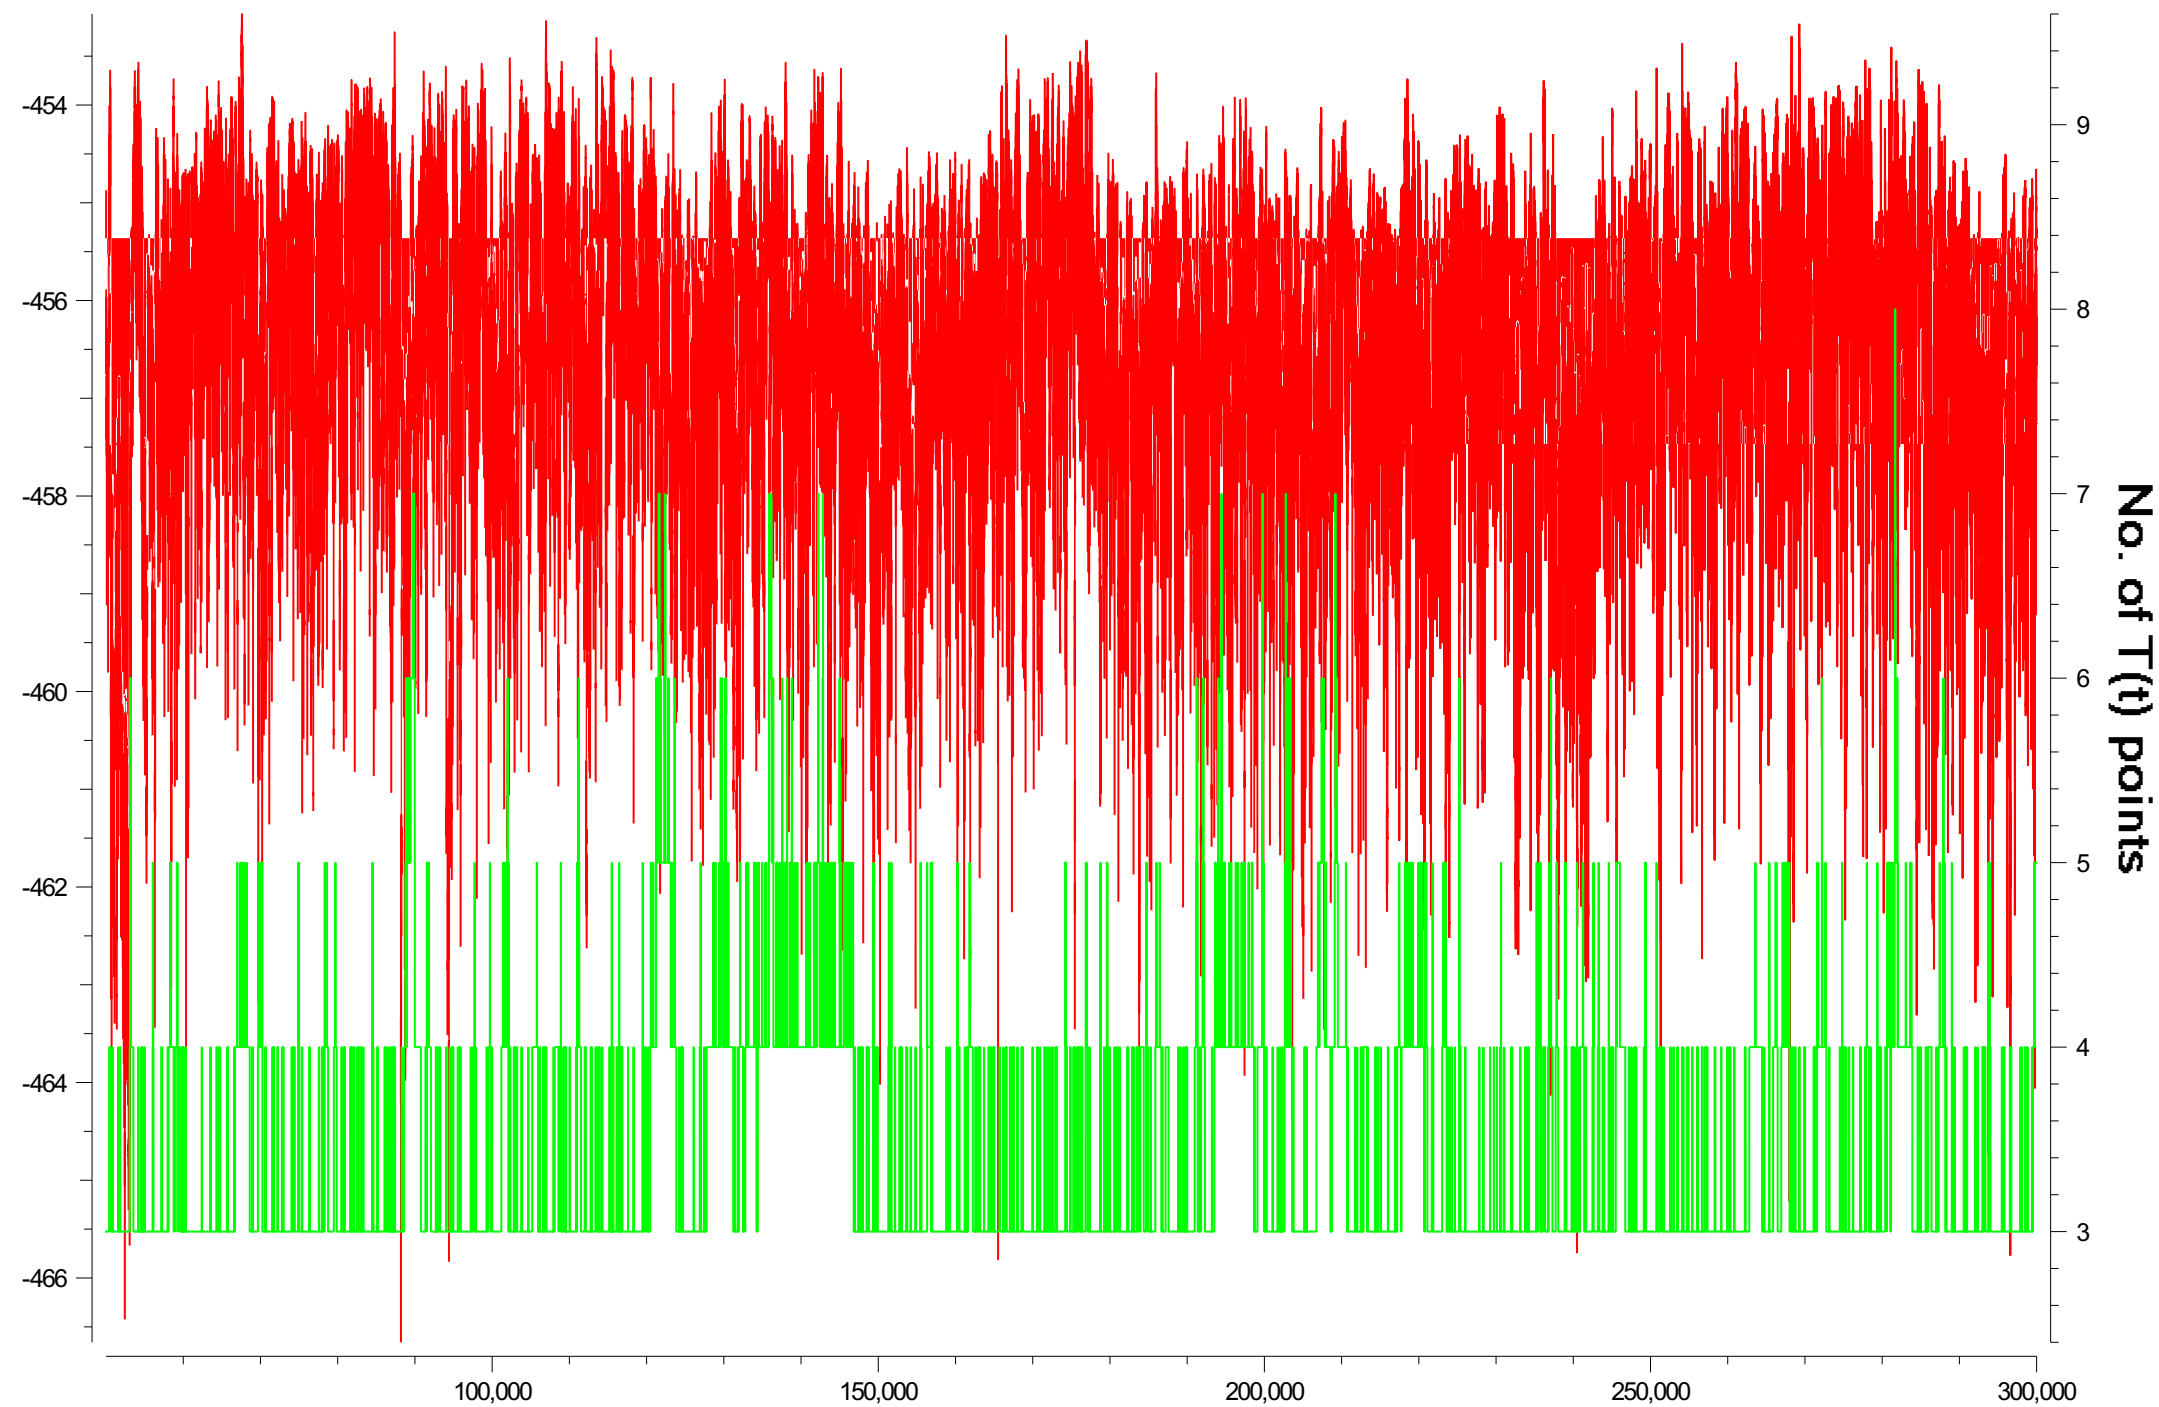

Iteration

— Likelihood — Nb. of  $T(t)$  points

Nb. of  $T(t)$  points

Supplement: Supplementary file 75 [file 1]

# Exercise3\_IM\_4\_Exercise3\_InputData.txt 10.00m : Expected

No. of tracks (m)

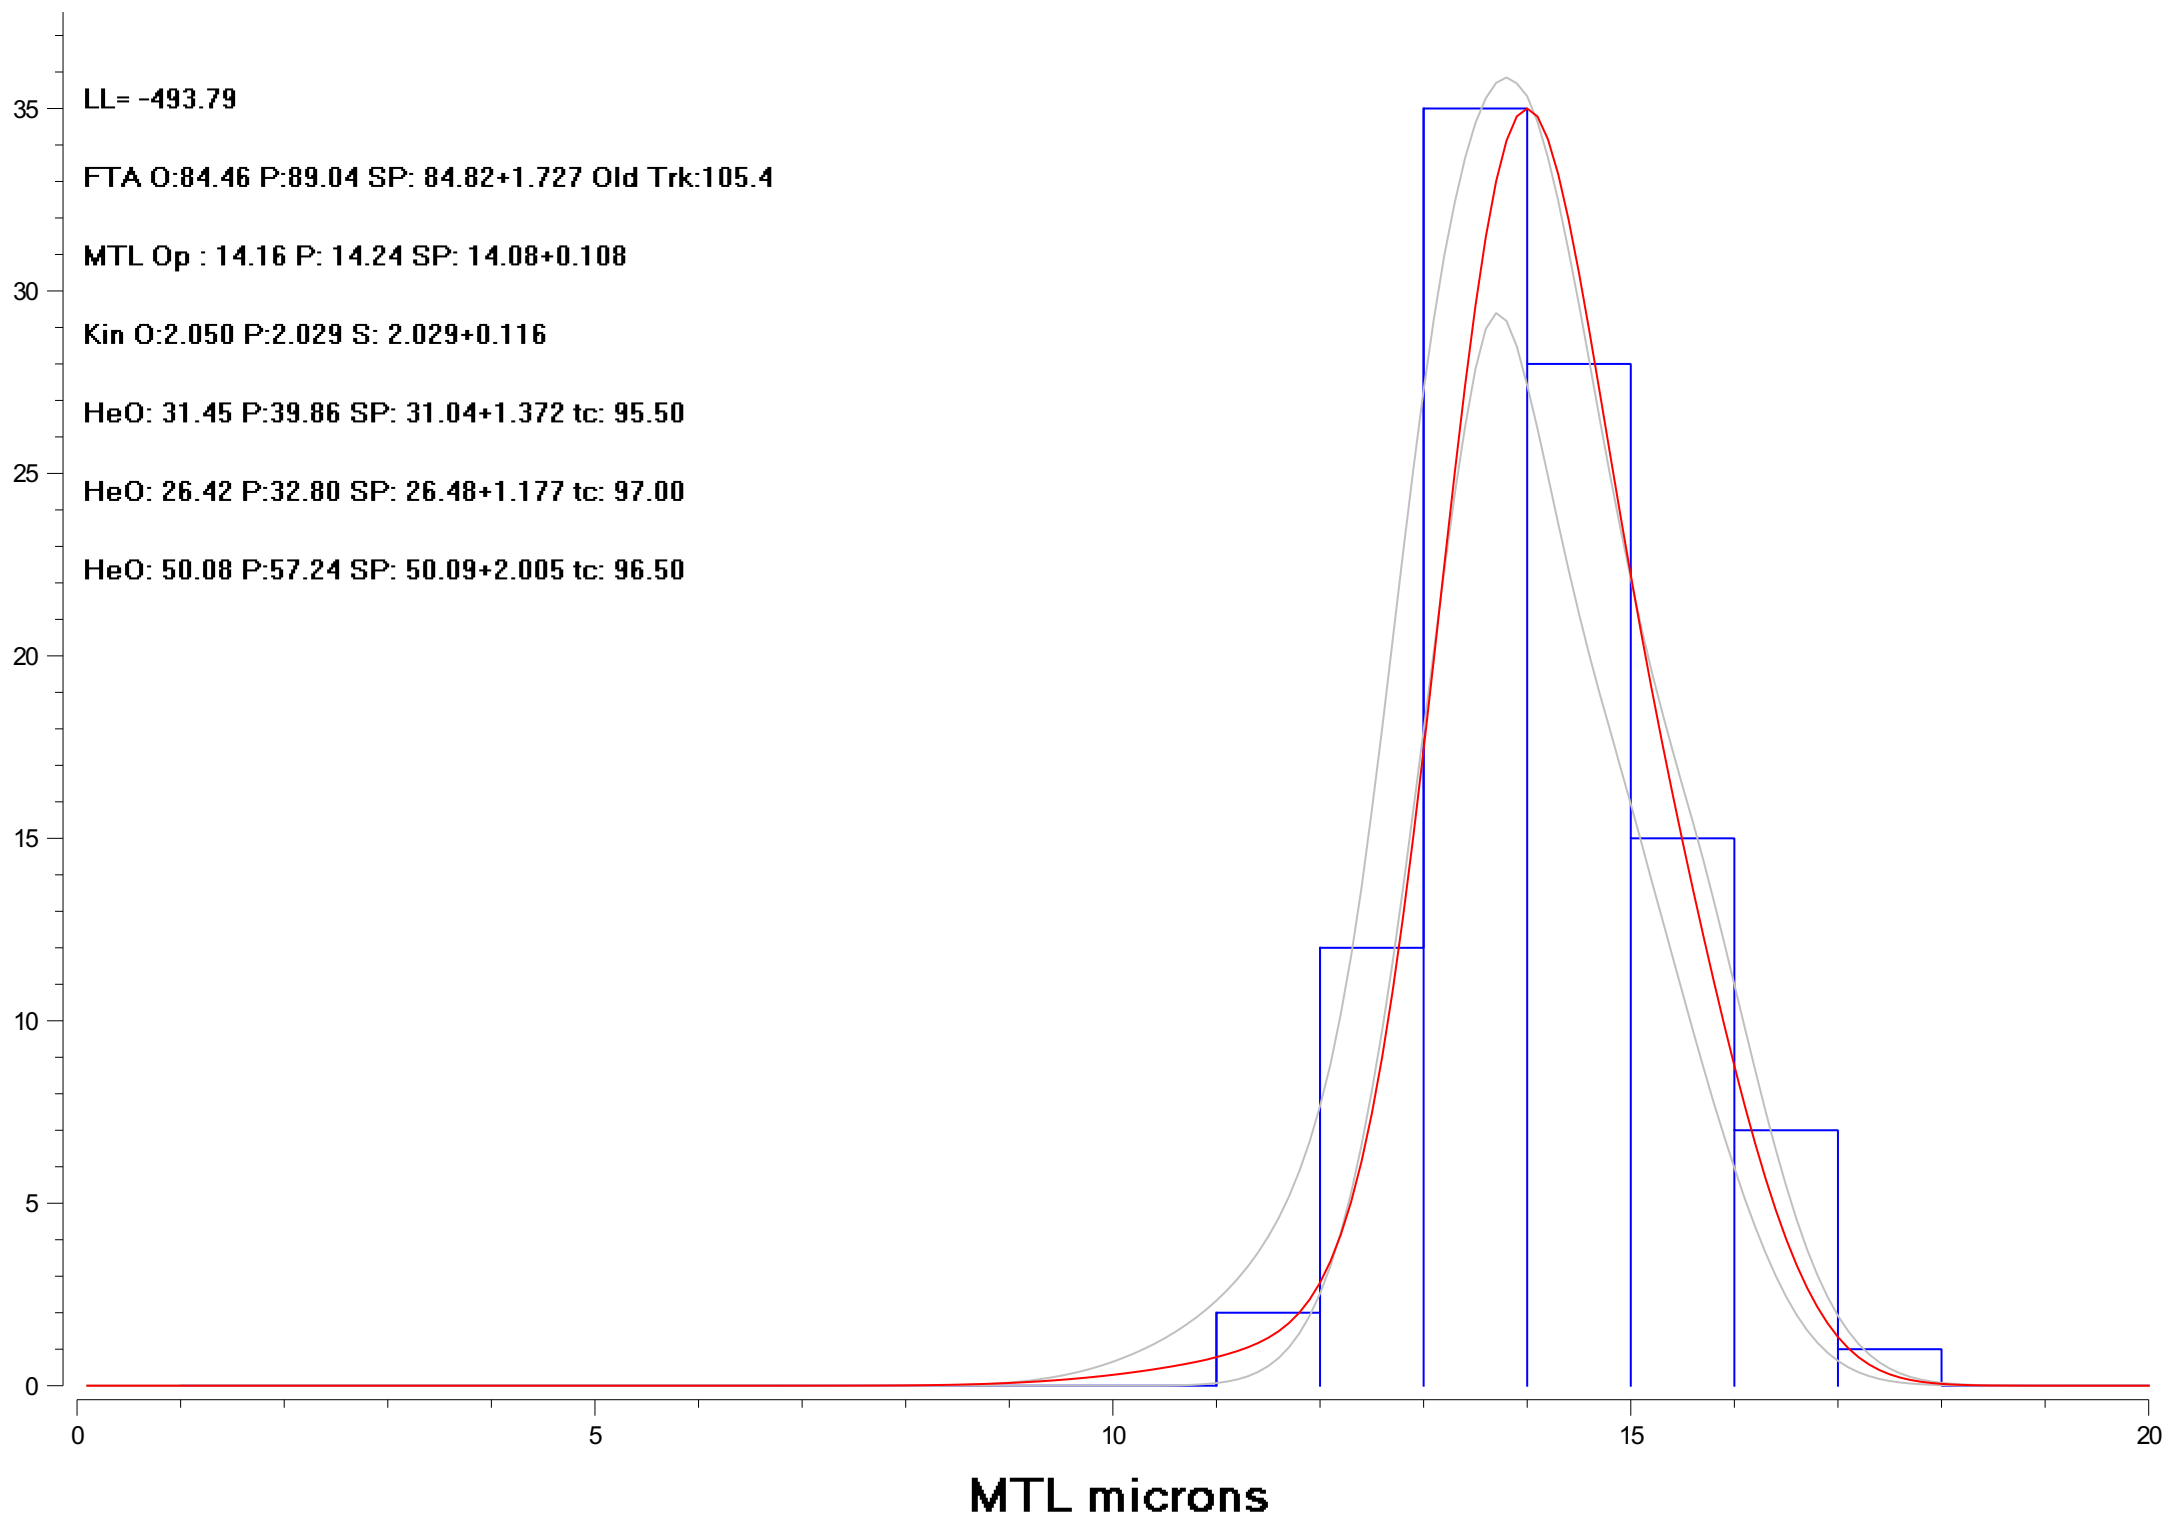

Supplement: Supplementary file 76 [file 1]

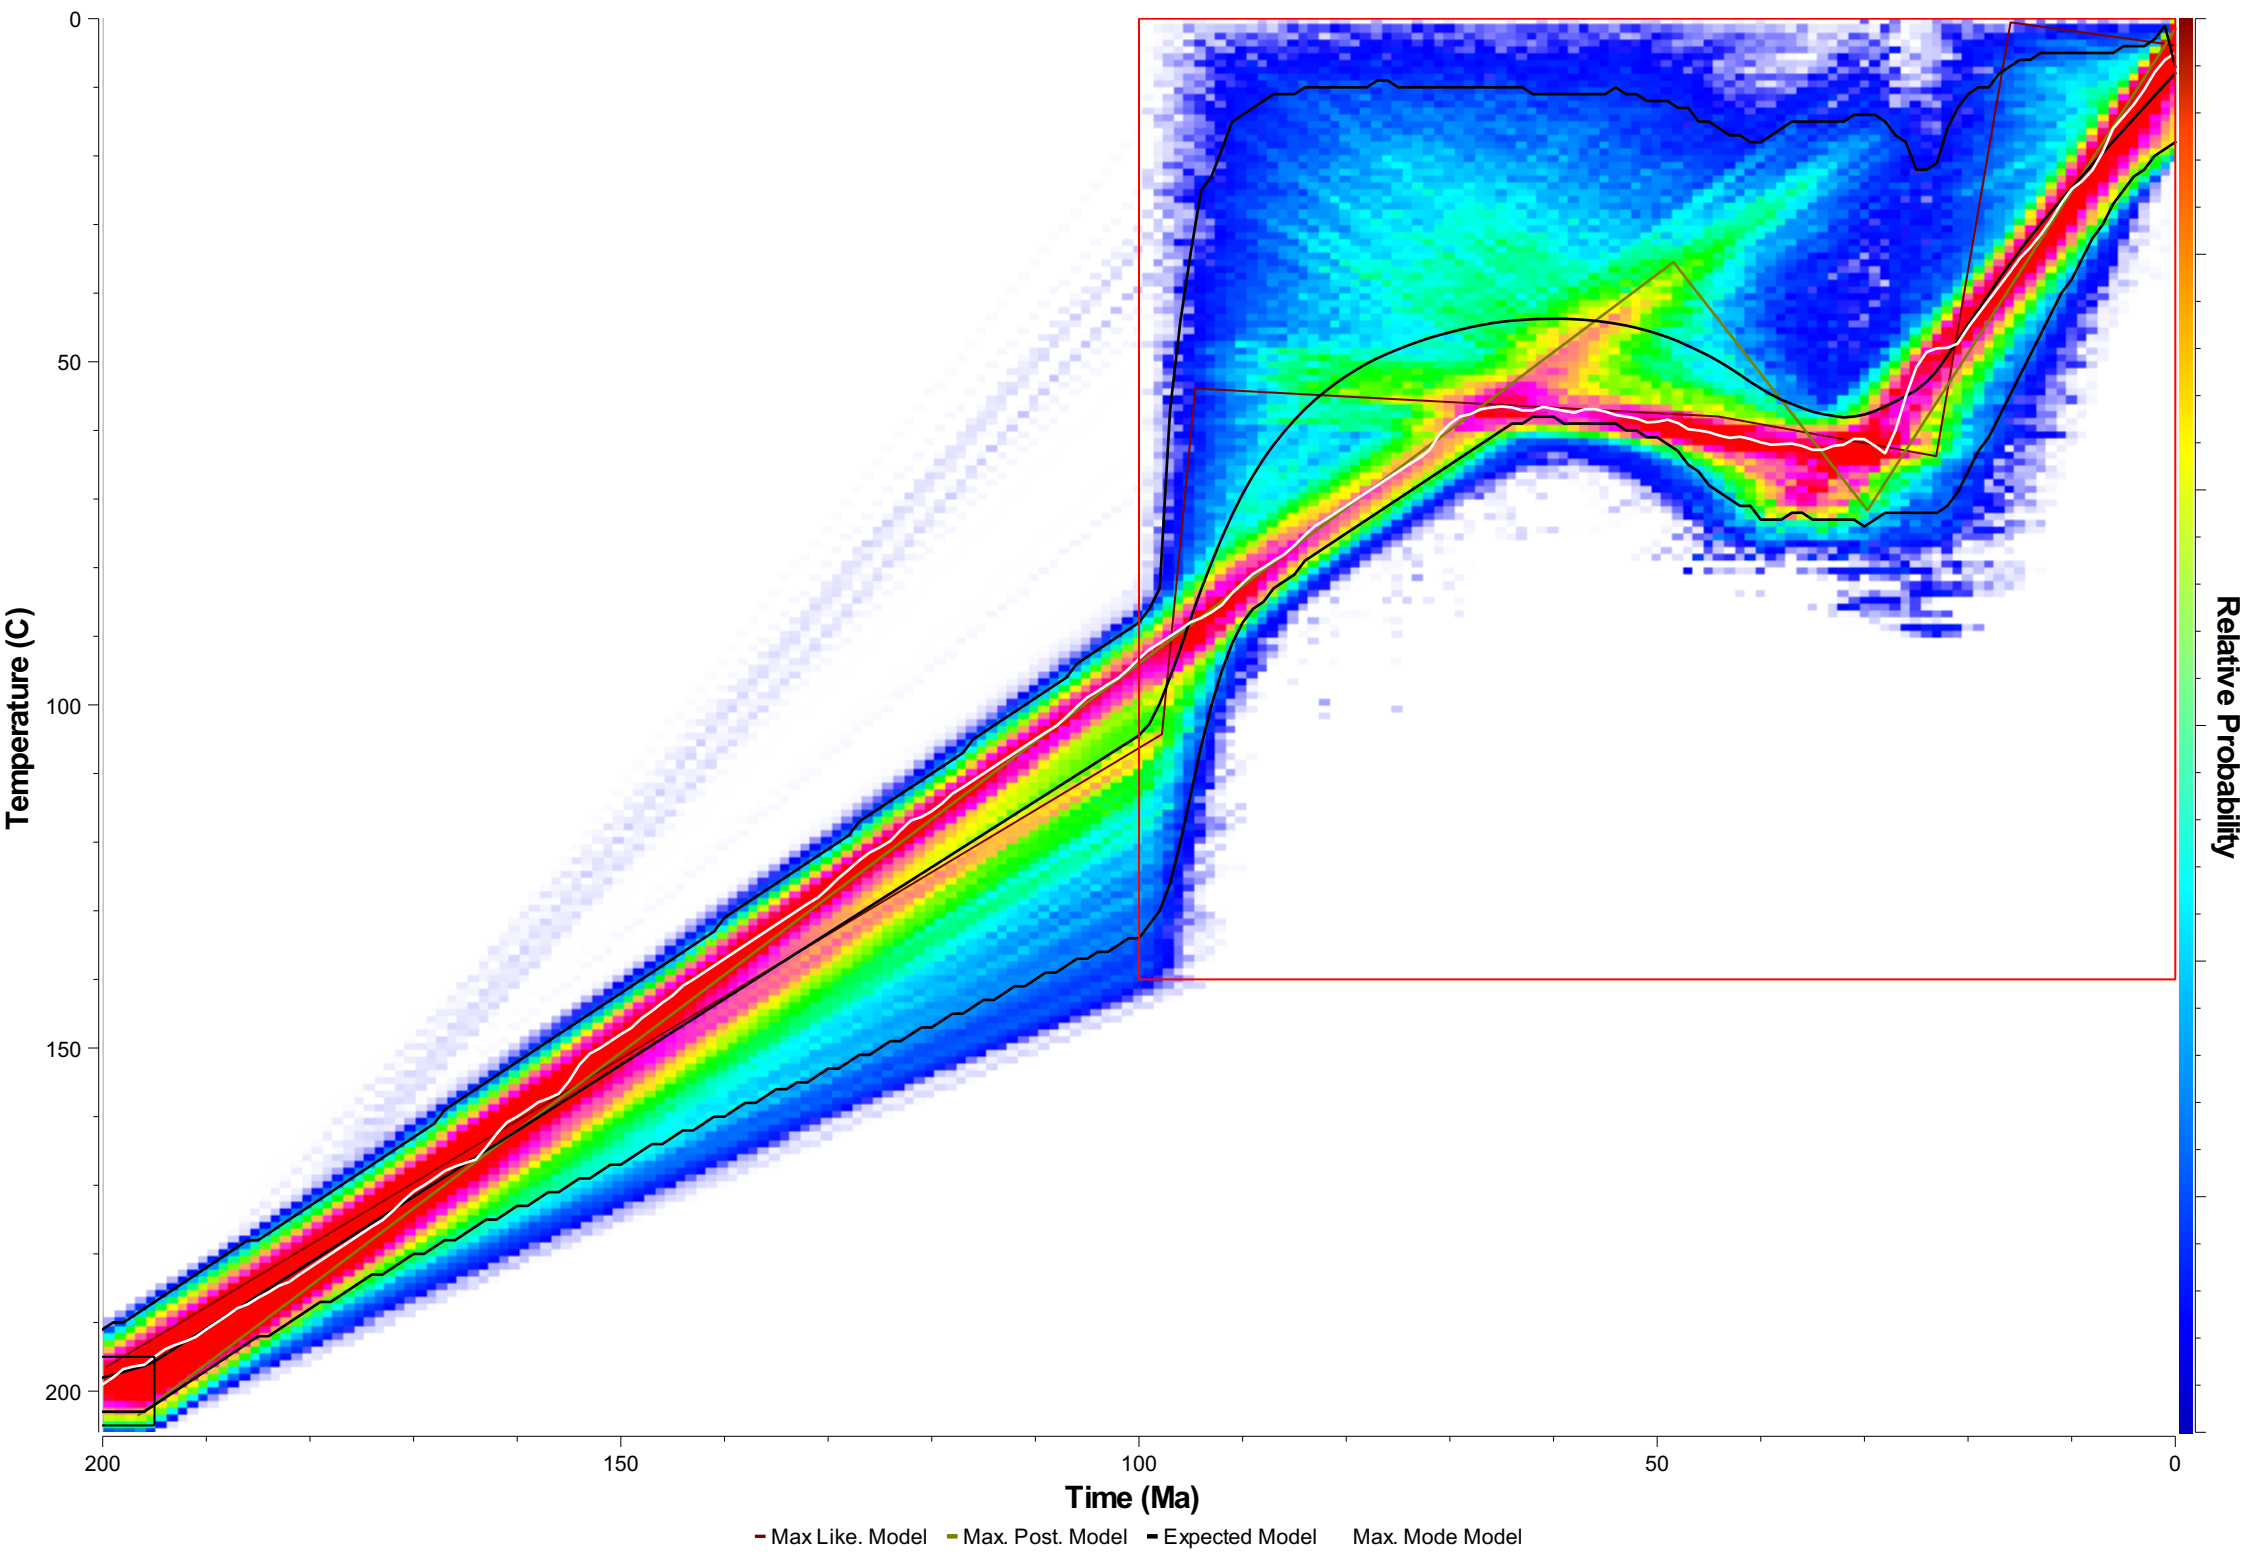

Supplement: Supplementary file 77 [file 1]

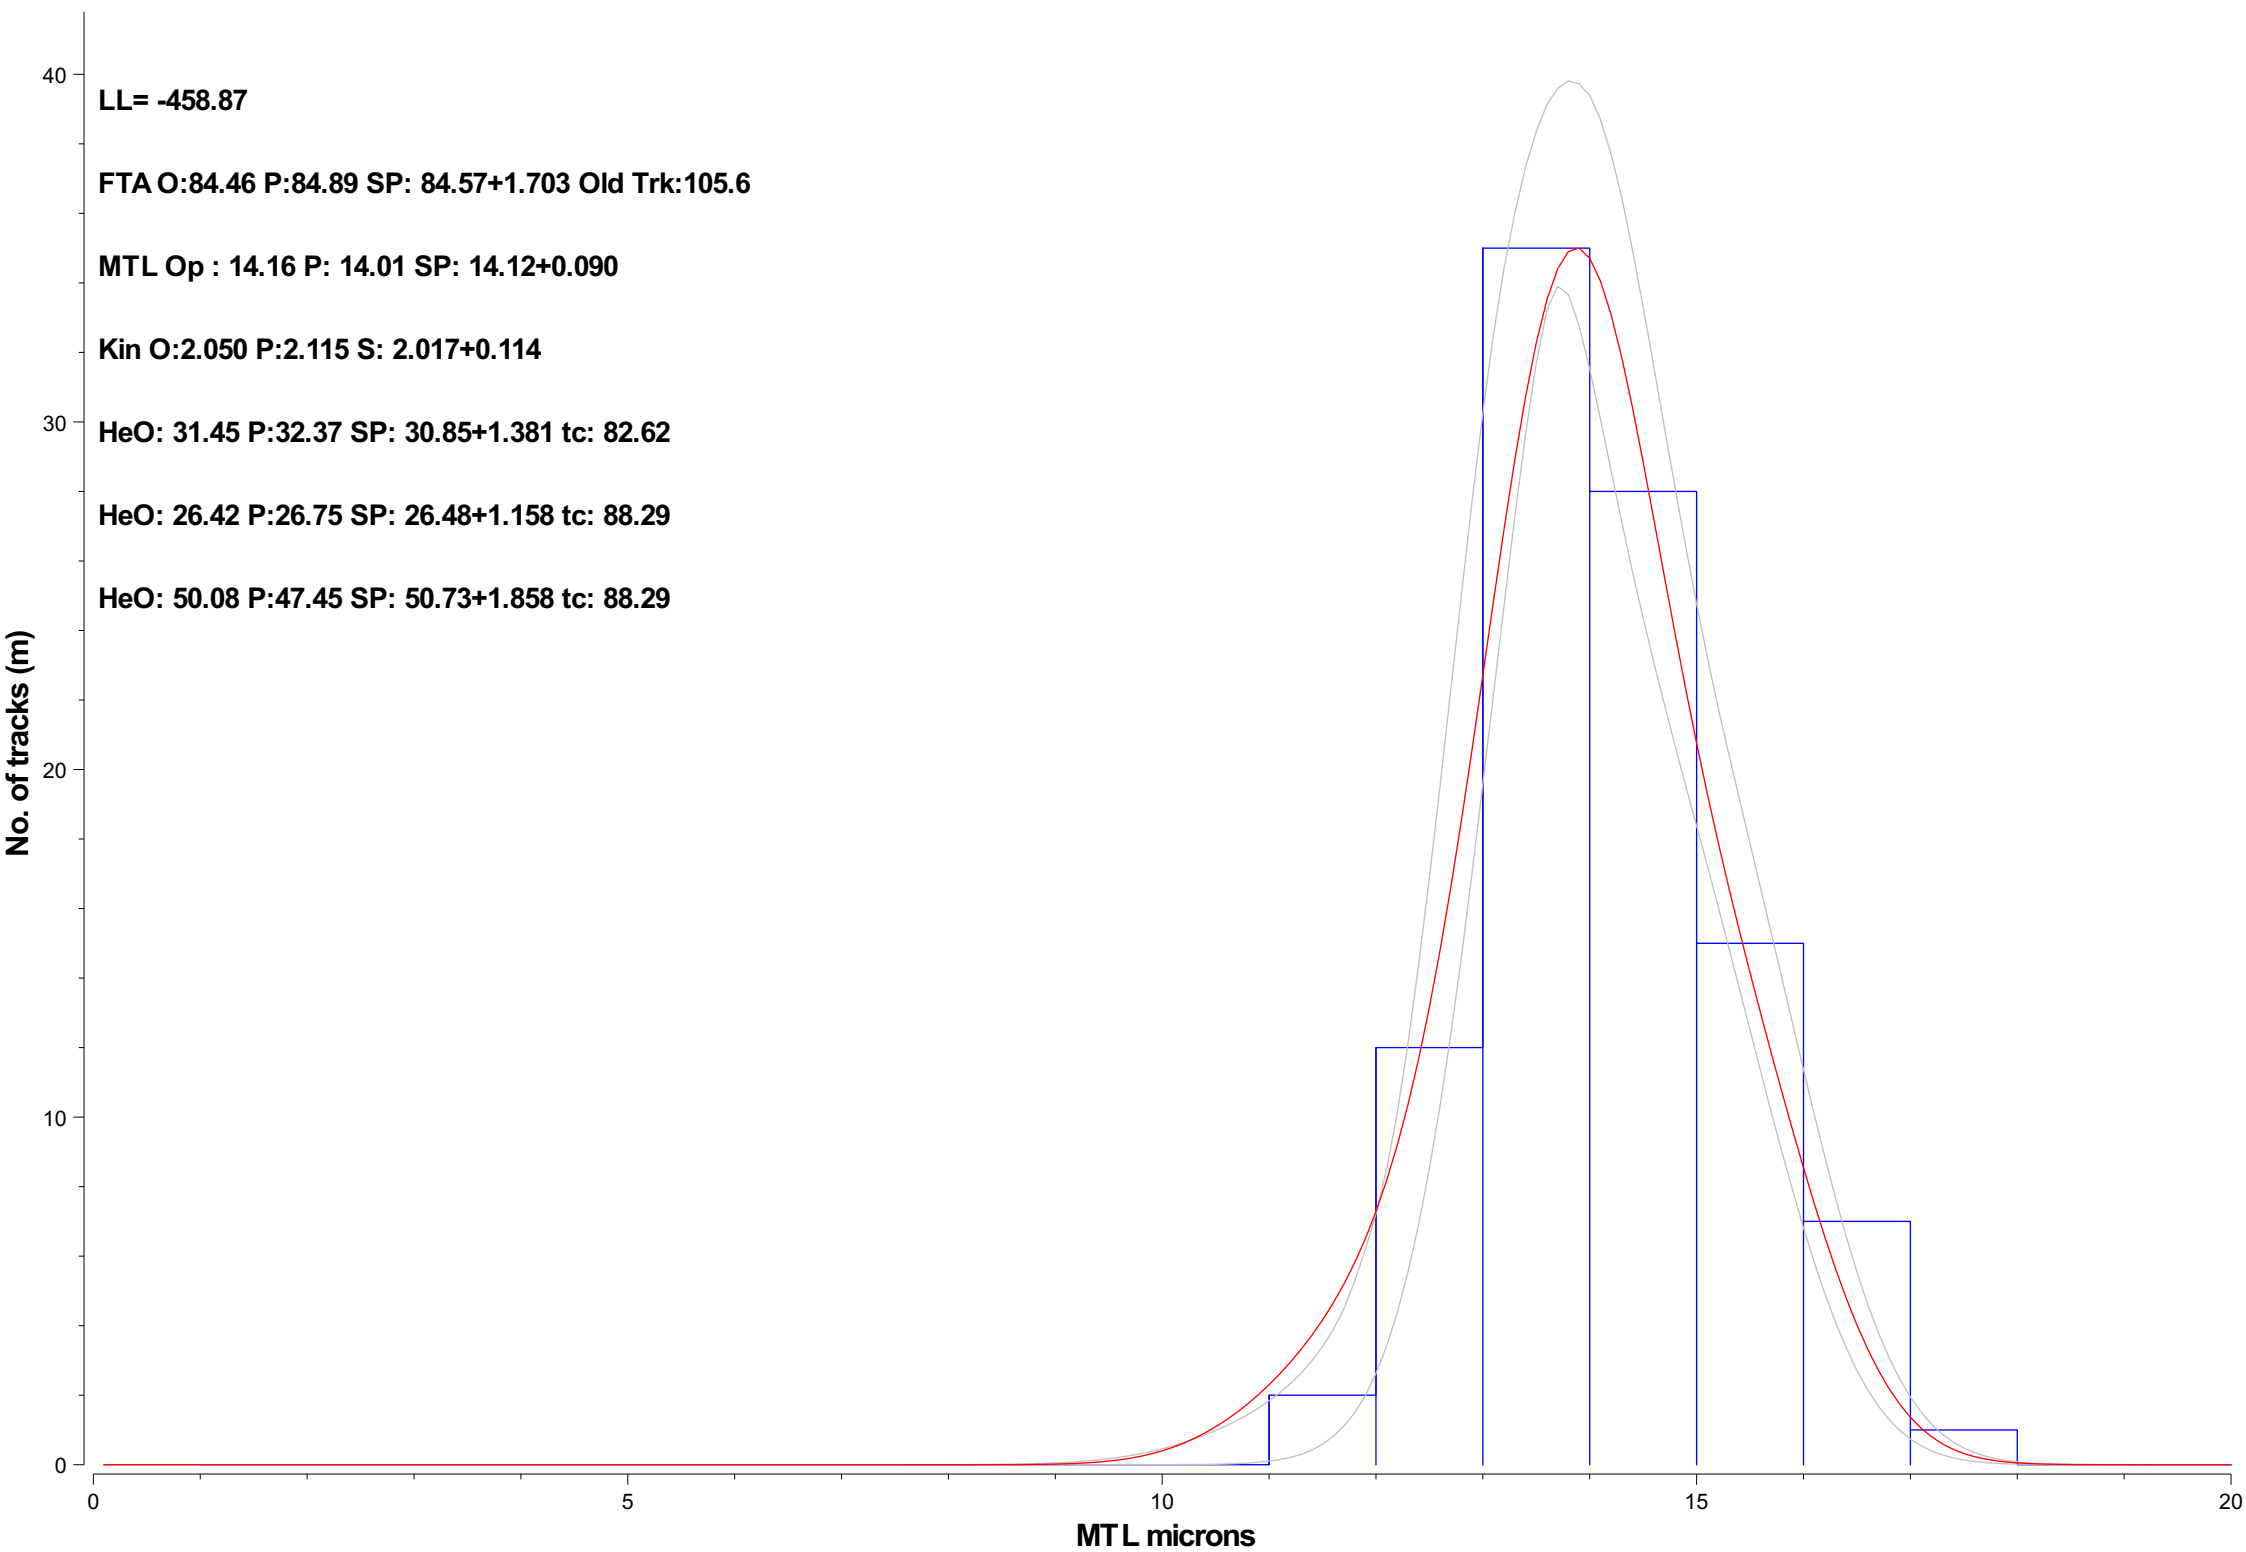

Supplement: Supplementary file 78 [file 1]

# Exercise4\_GROUPC-1\_3 : Max Post Time (Ma)

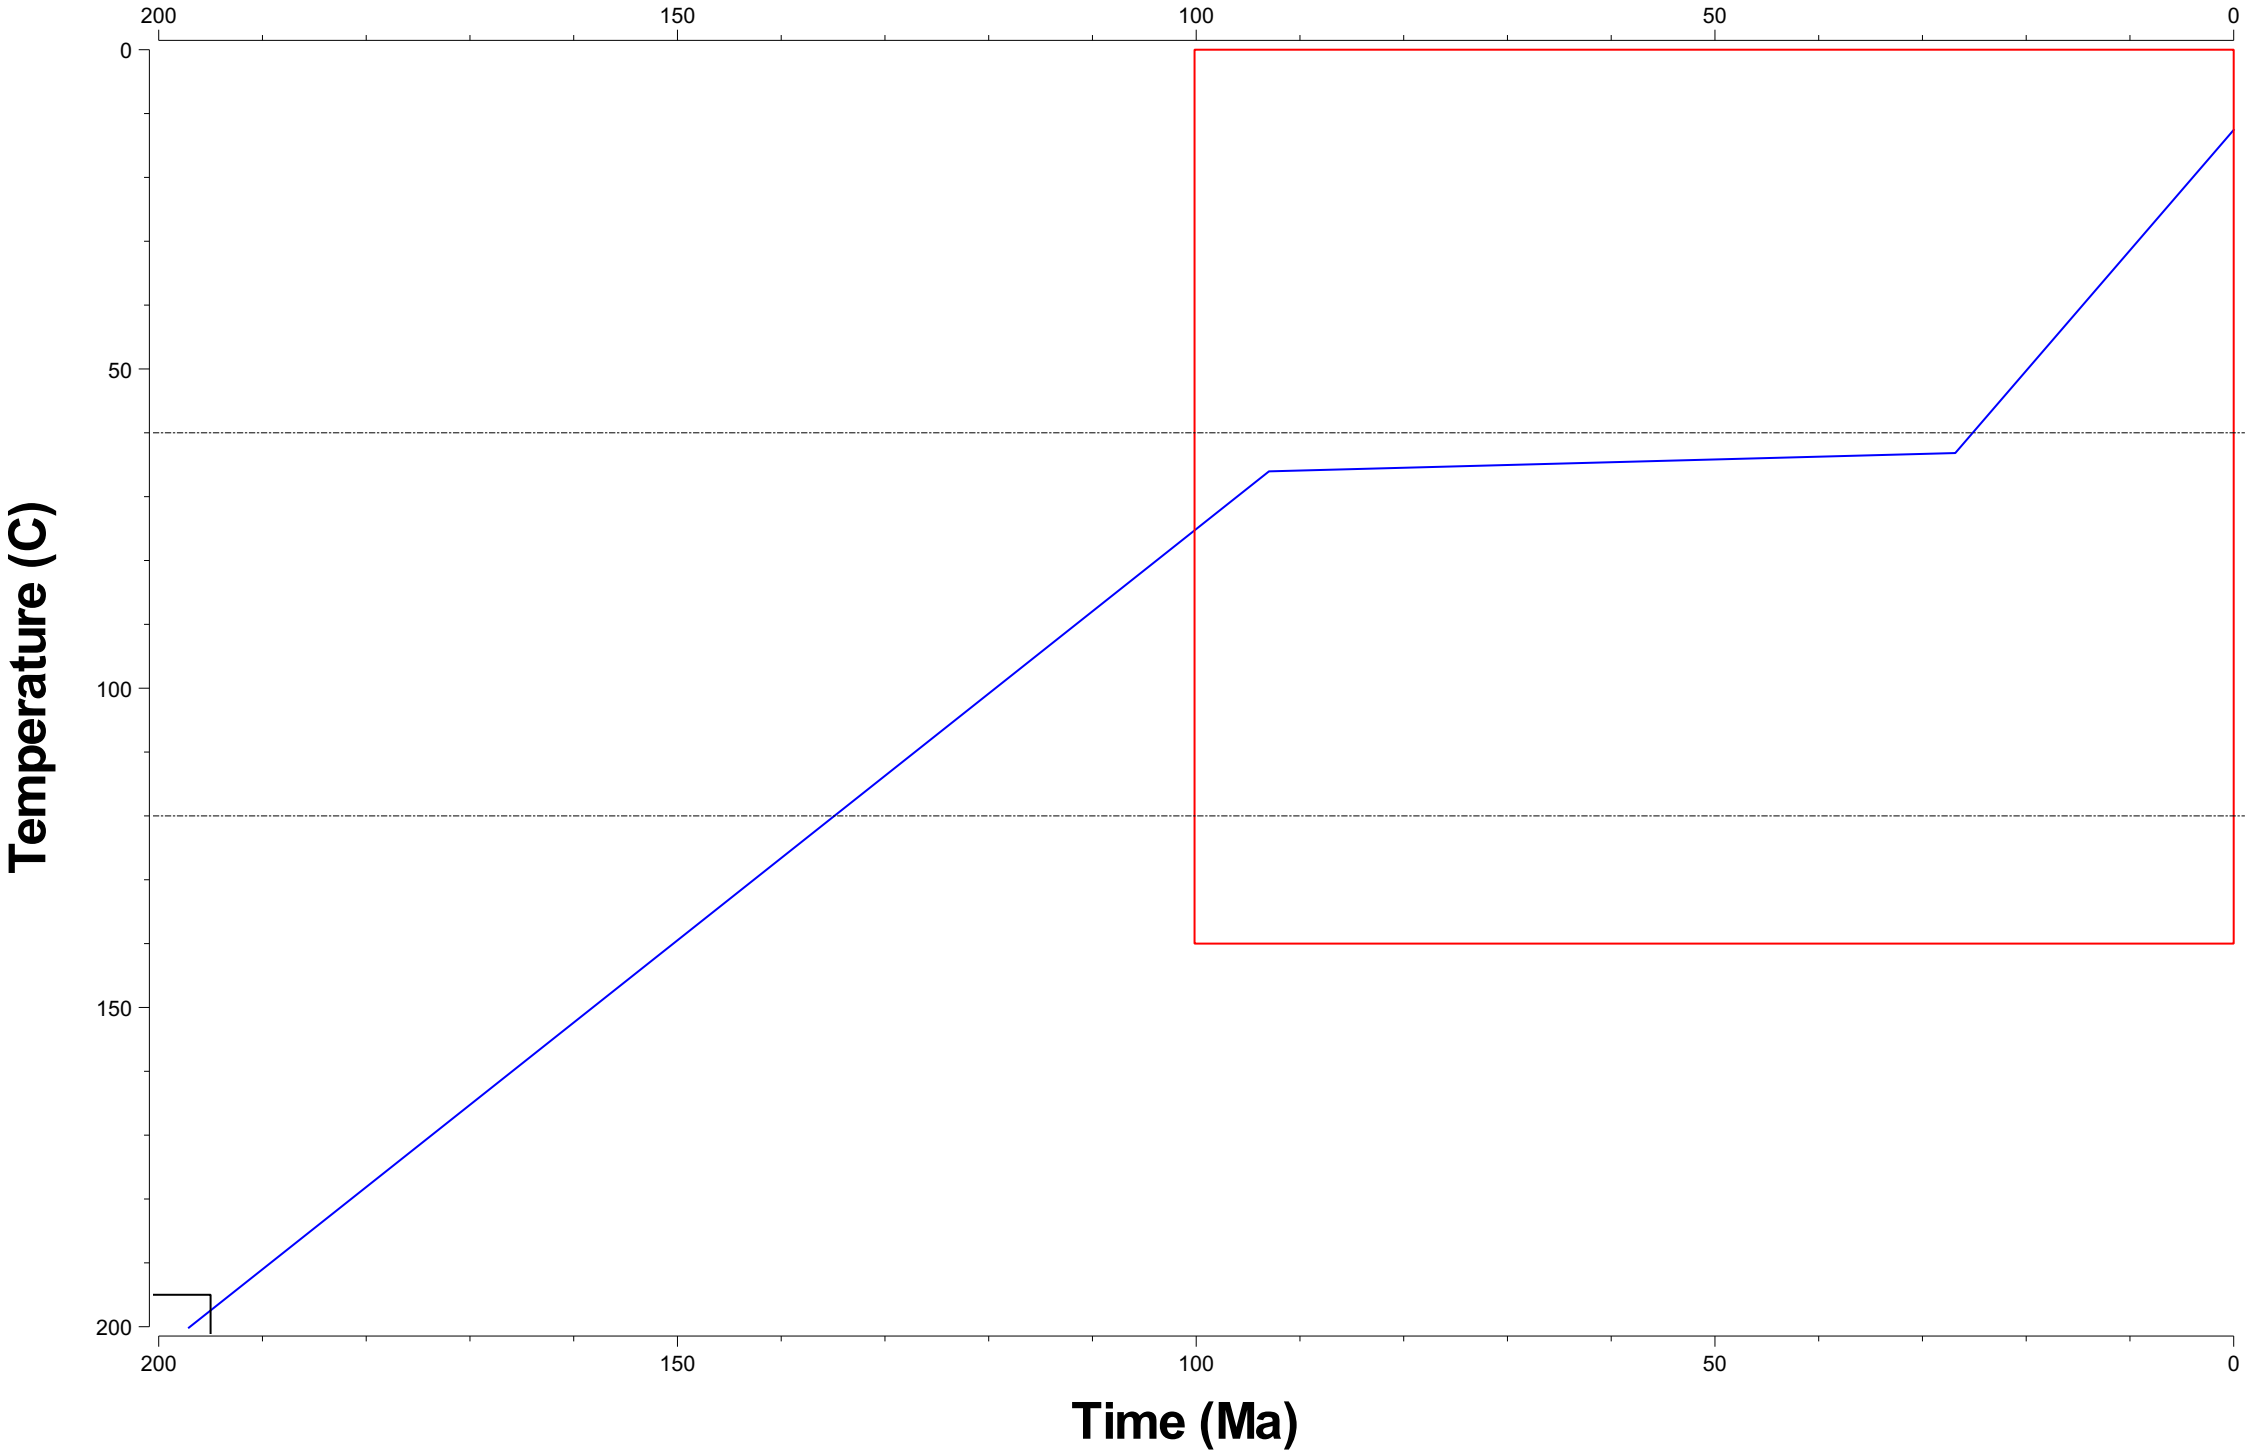

Supplement: Supplementary file 79 [file 1]

# Exercise3\_IM\_4 : Max Post

Time (Ma)

Temperature (C)

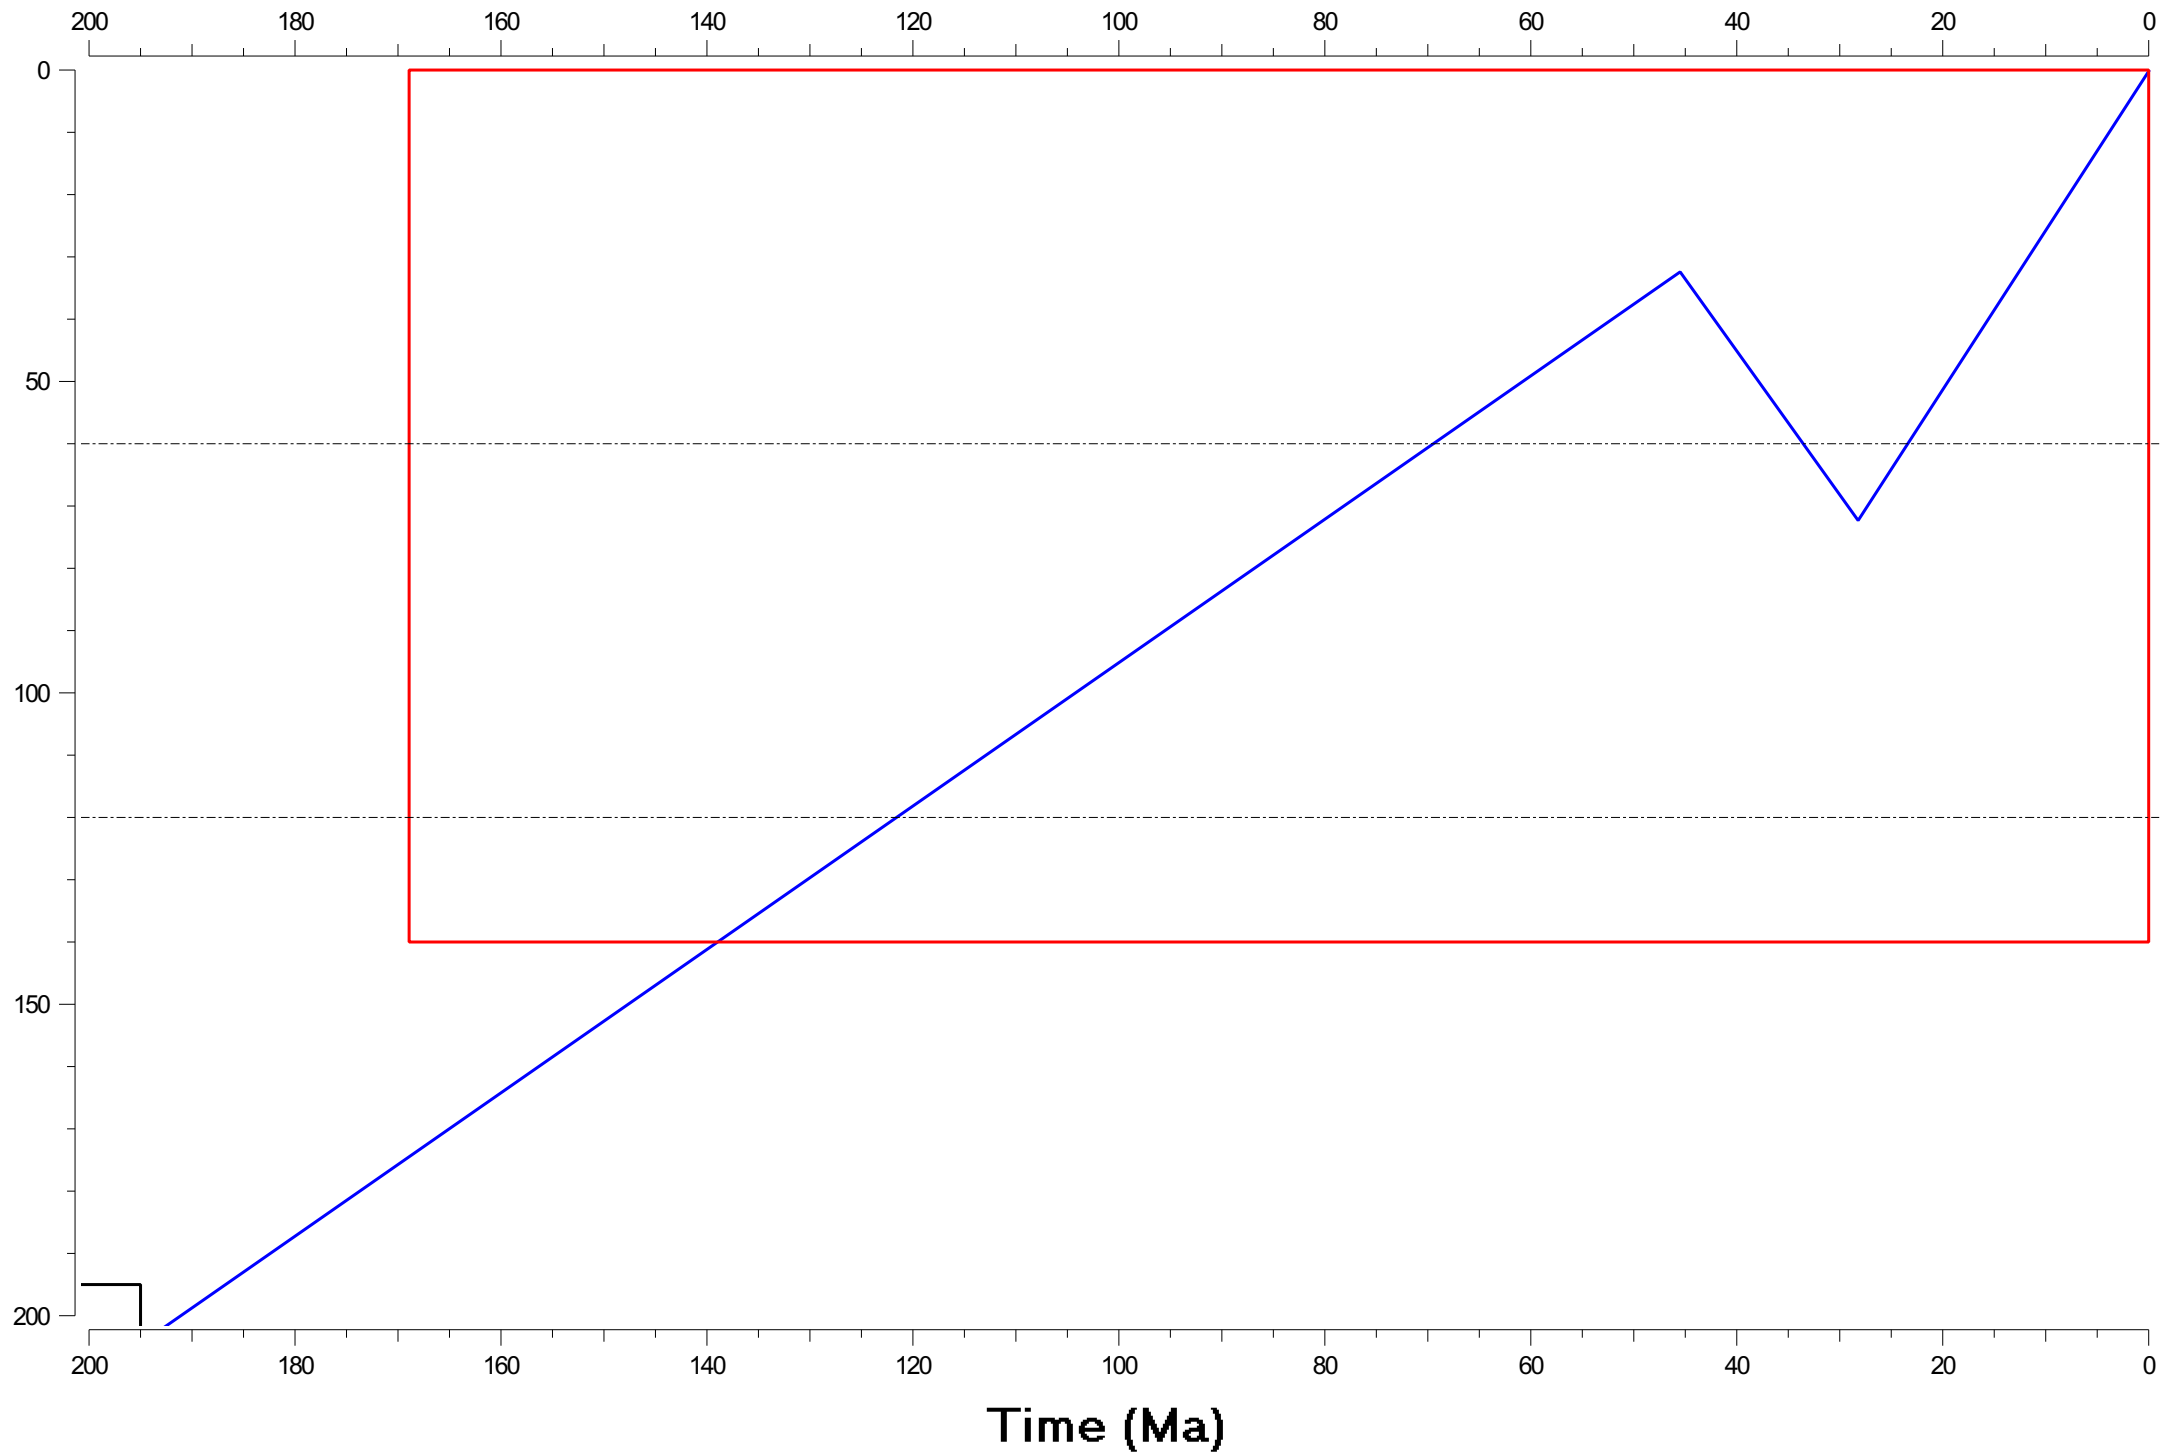

Supplement: Supplementary file 80 [file 1]

# Exercise4\_GROUPD-2\_3\_Exercise4\_InputData.txt 10.00m : Expected

No. of tracks (m)

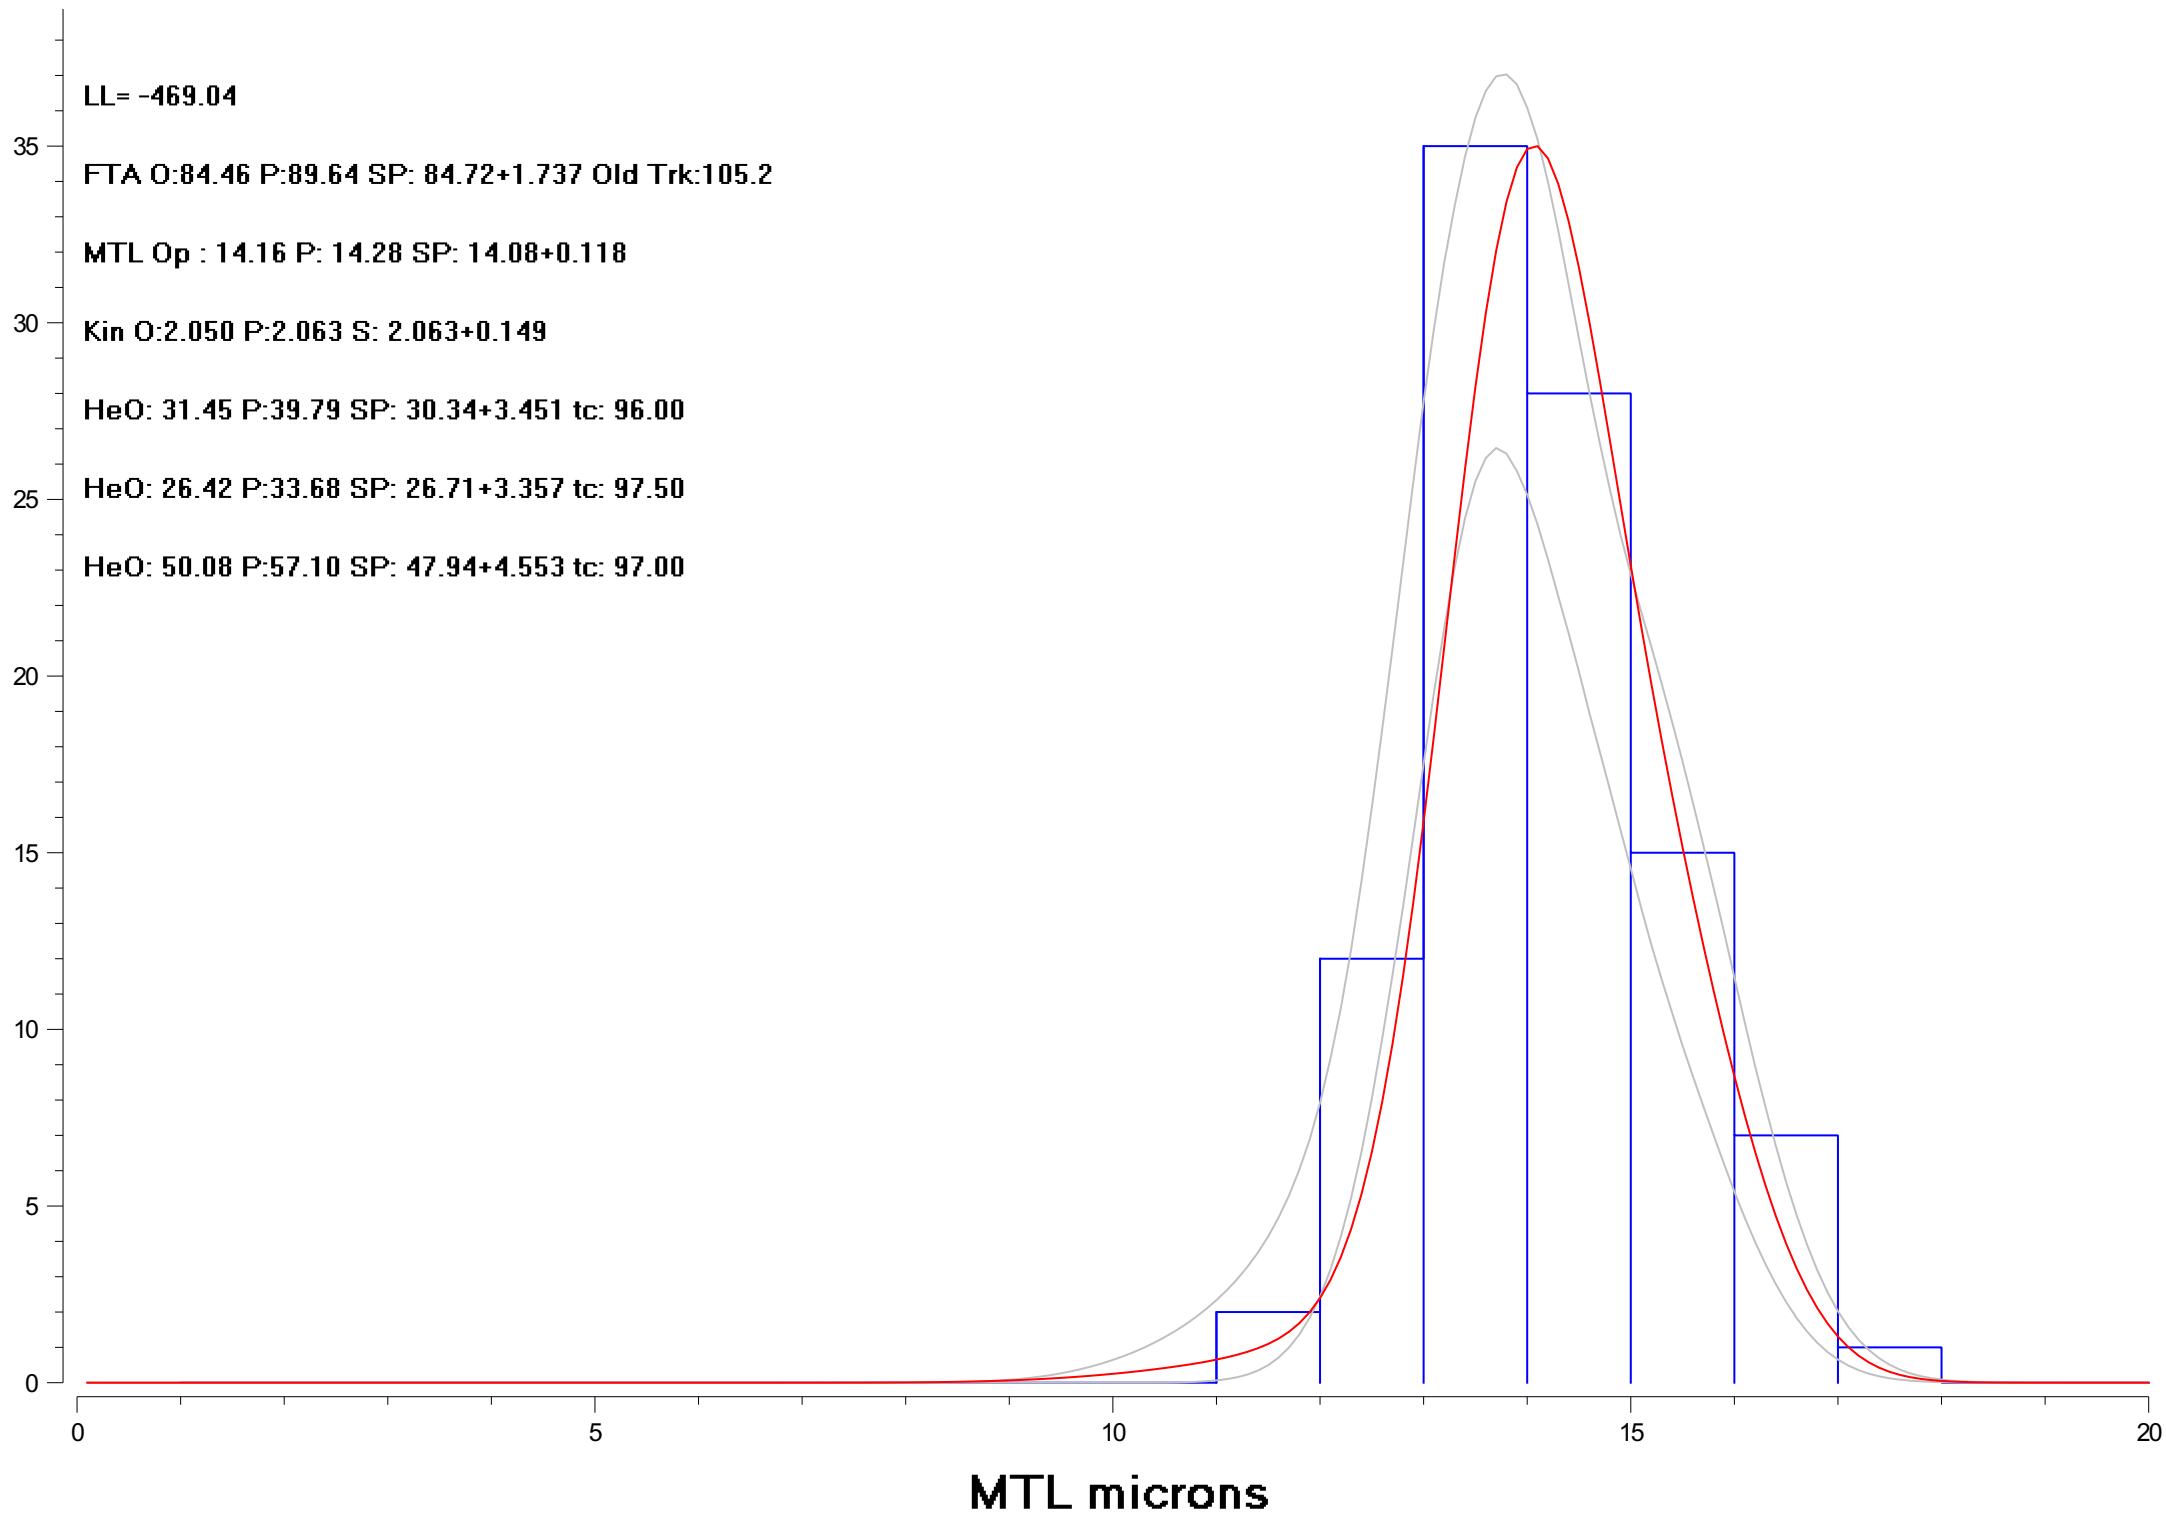

Supplement: Supplementary file 81 [file 1]

# Exercise4\_GROUPD-1\_3

Log Posterior

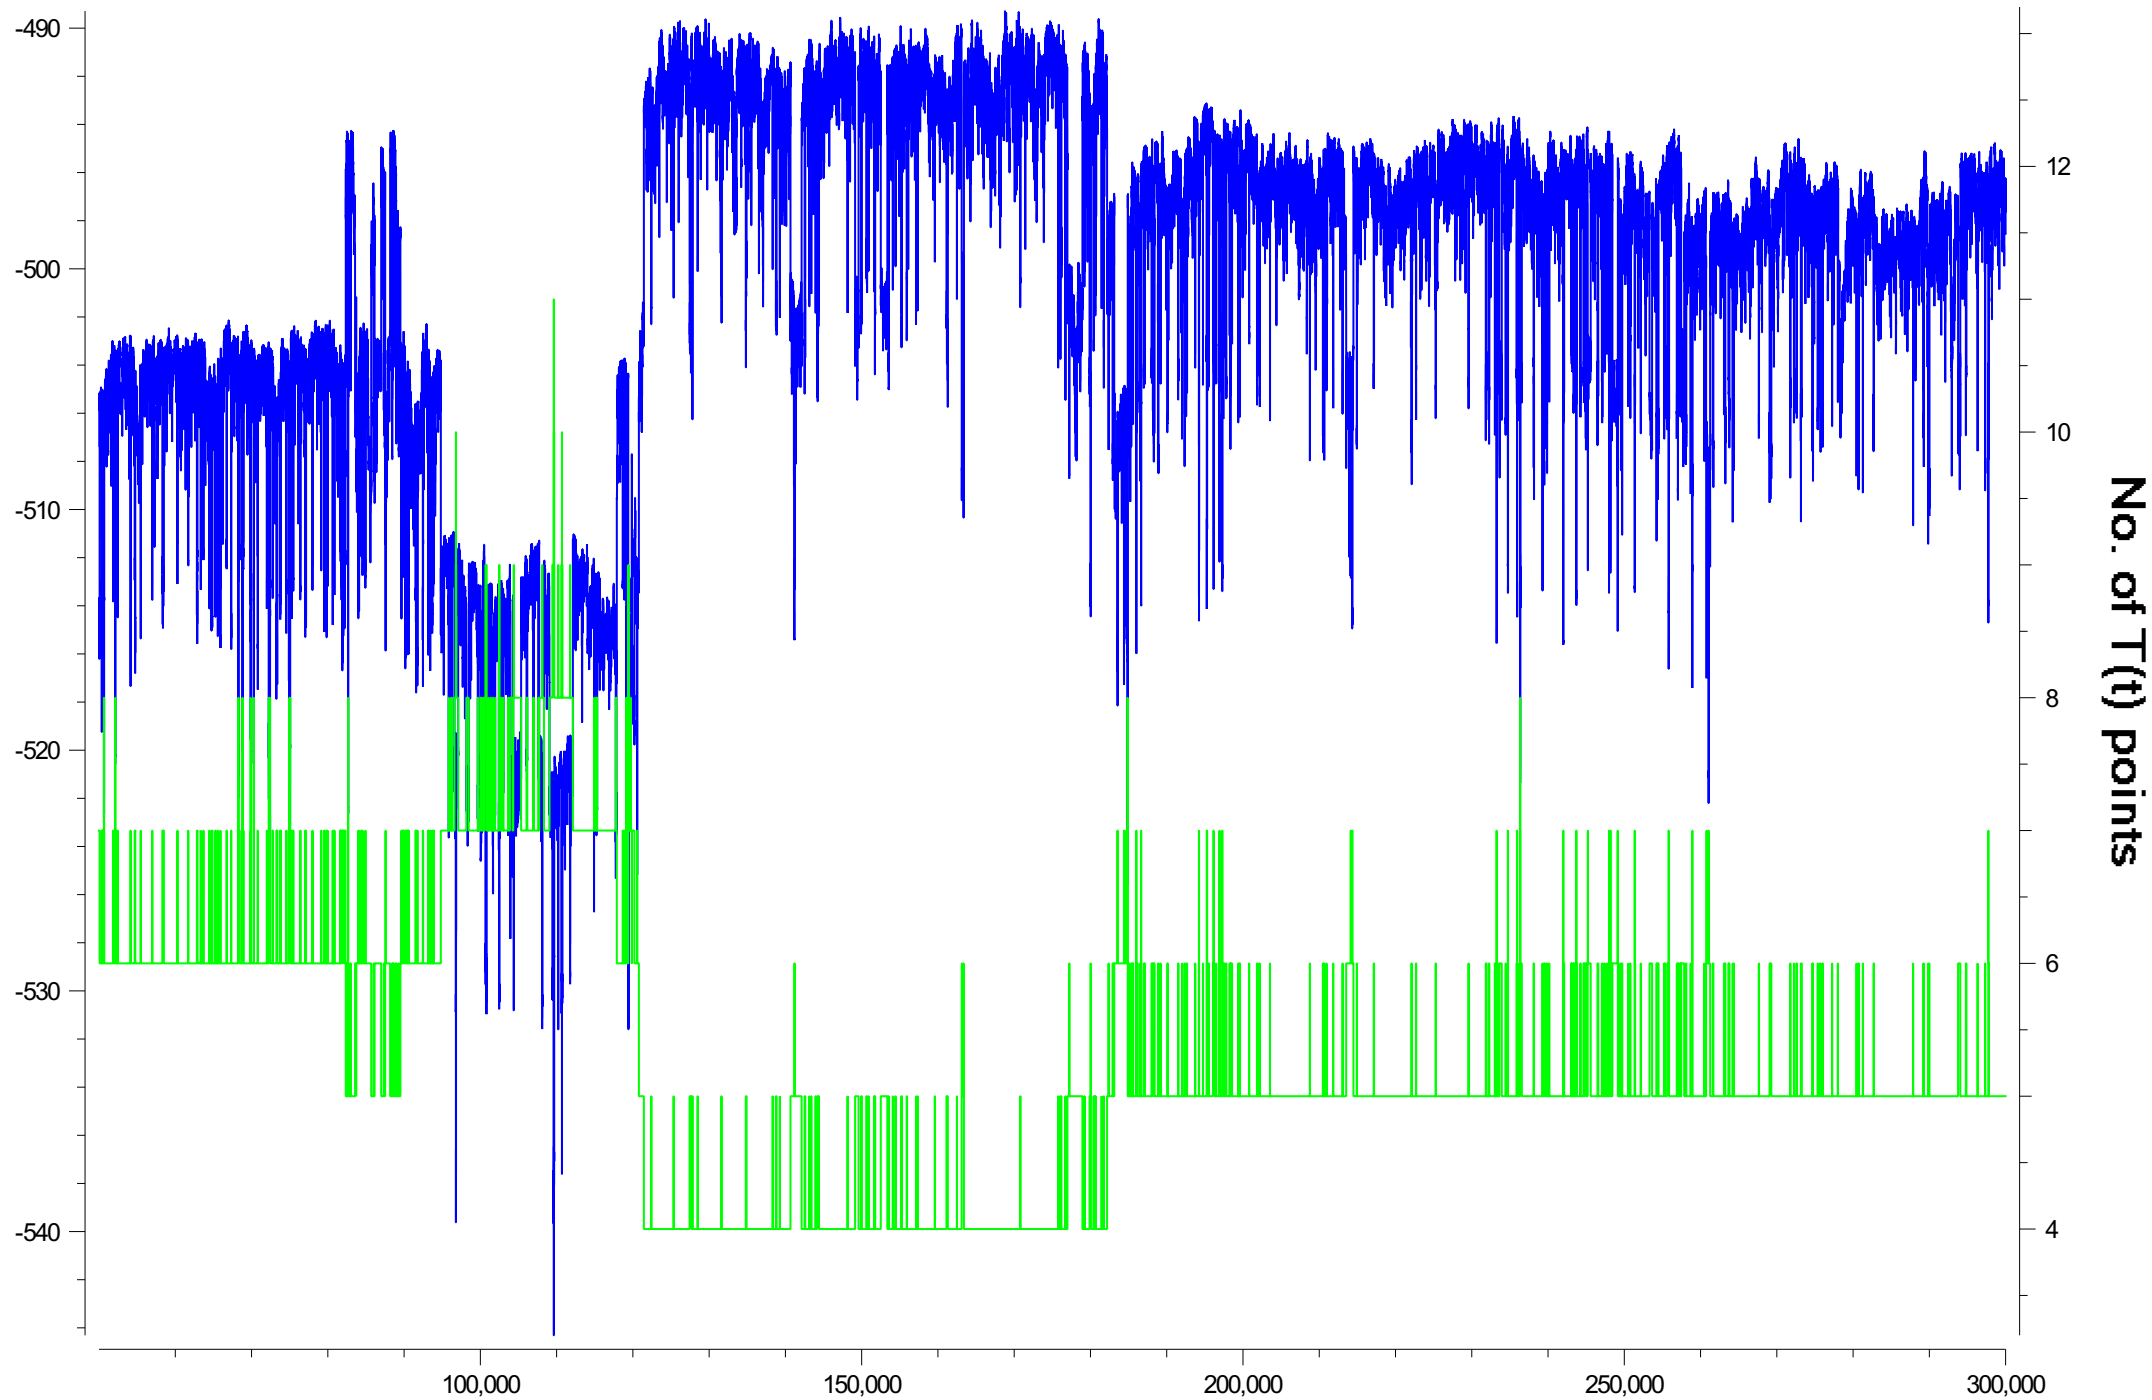

No. of  $T(t)$  points

Iteration

— Posterior — No. of  $T(t)$  points

Supplement: Supplementary file 83 [file 1]

# Exercise4\_InputData\_UTHe\_only\_dataset2\_3 : Max Like Time (Ma)

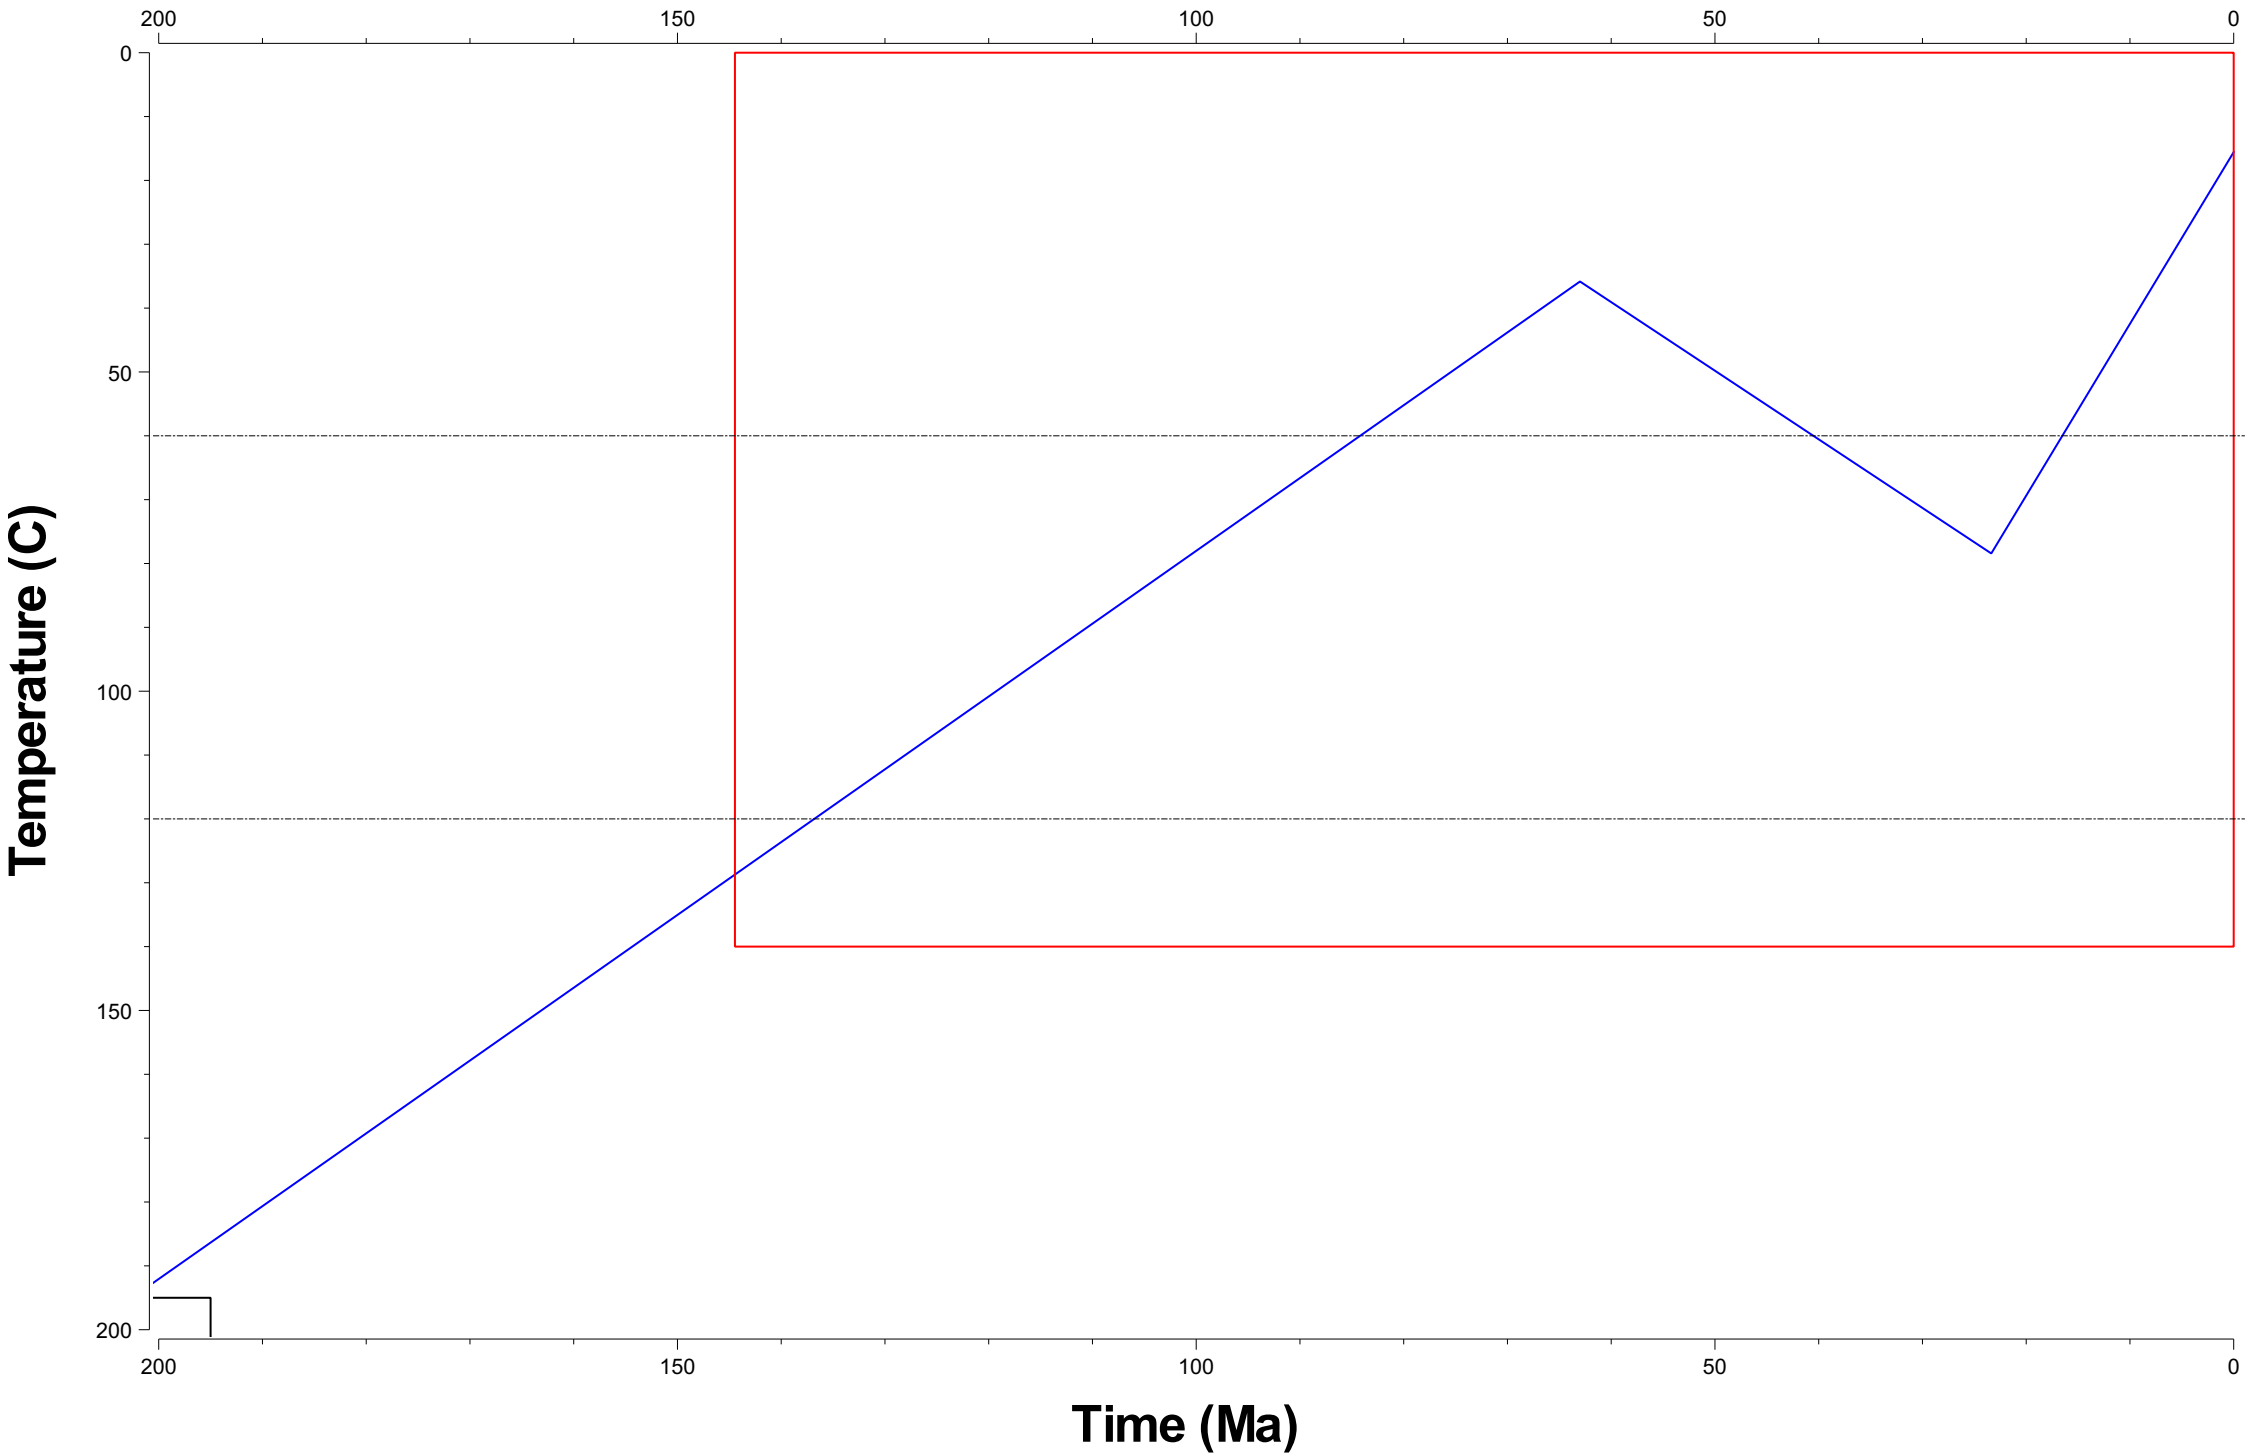

Supplement: Supplementary file 84 [file 1]

# Exercise4\_InputData\_UTHe\_only\_dataset2\_3 : EXPECTED

## Time (Ma)

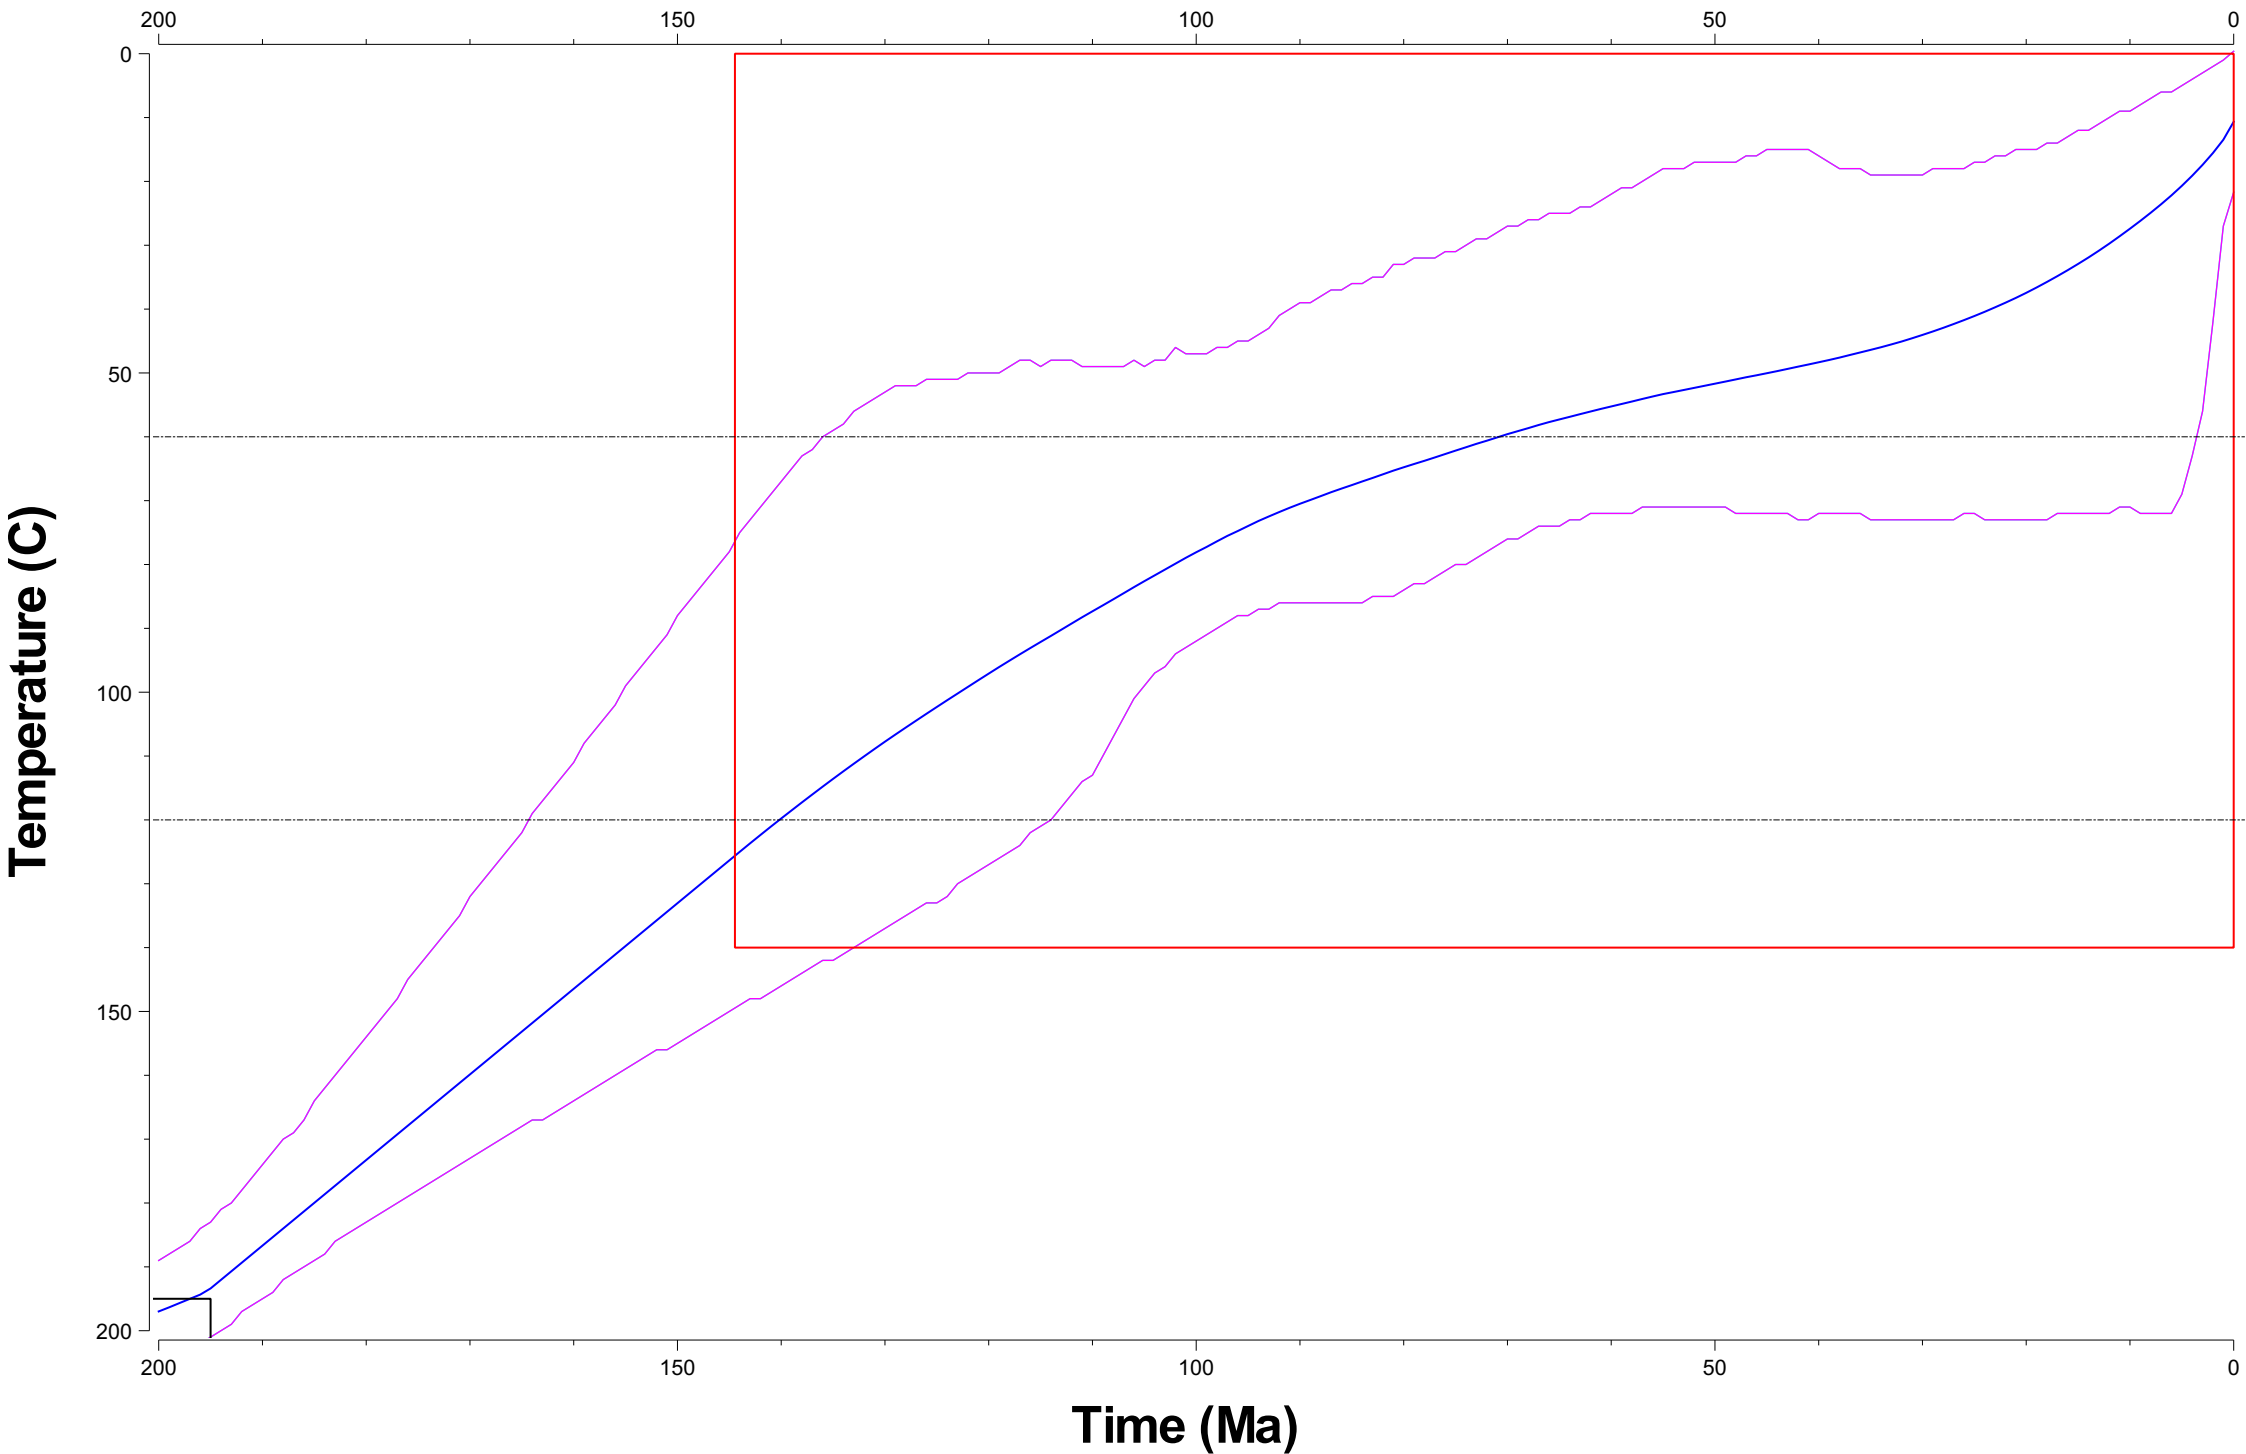

Supplement: Supplementary file 85 [file 1]

# Exercise4\_GROUPC-1\_3\_Exercise4\_InputData\_UThHe\_only\_dataset1.txt : Expected

Predicted Age (Ma)

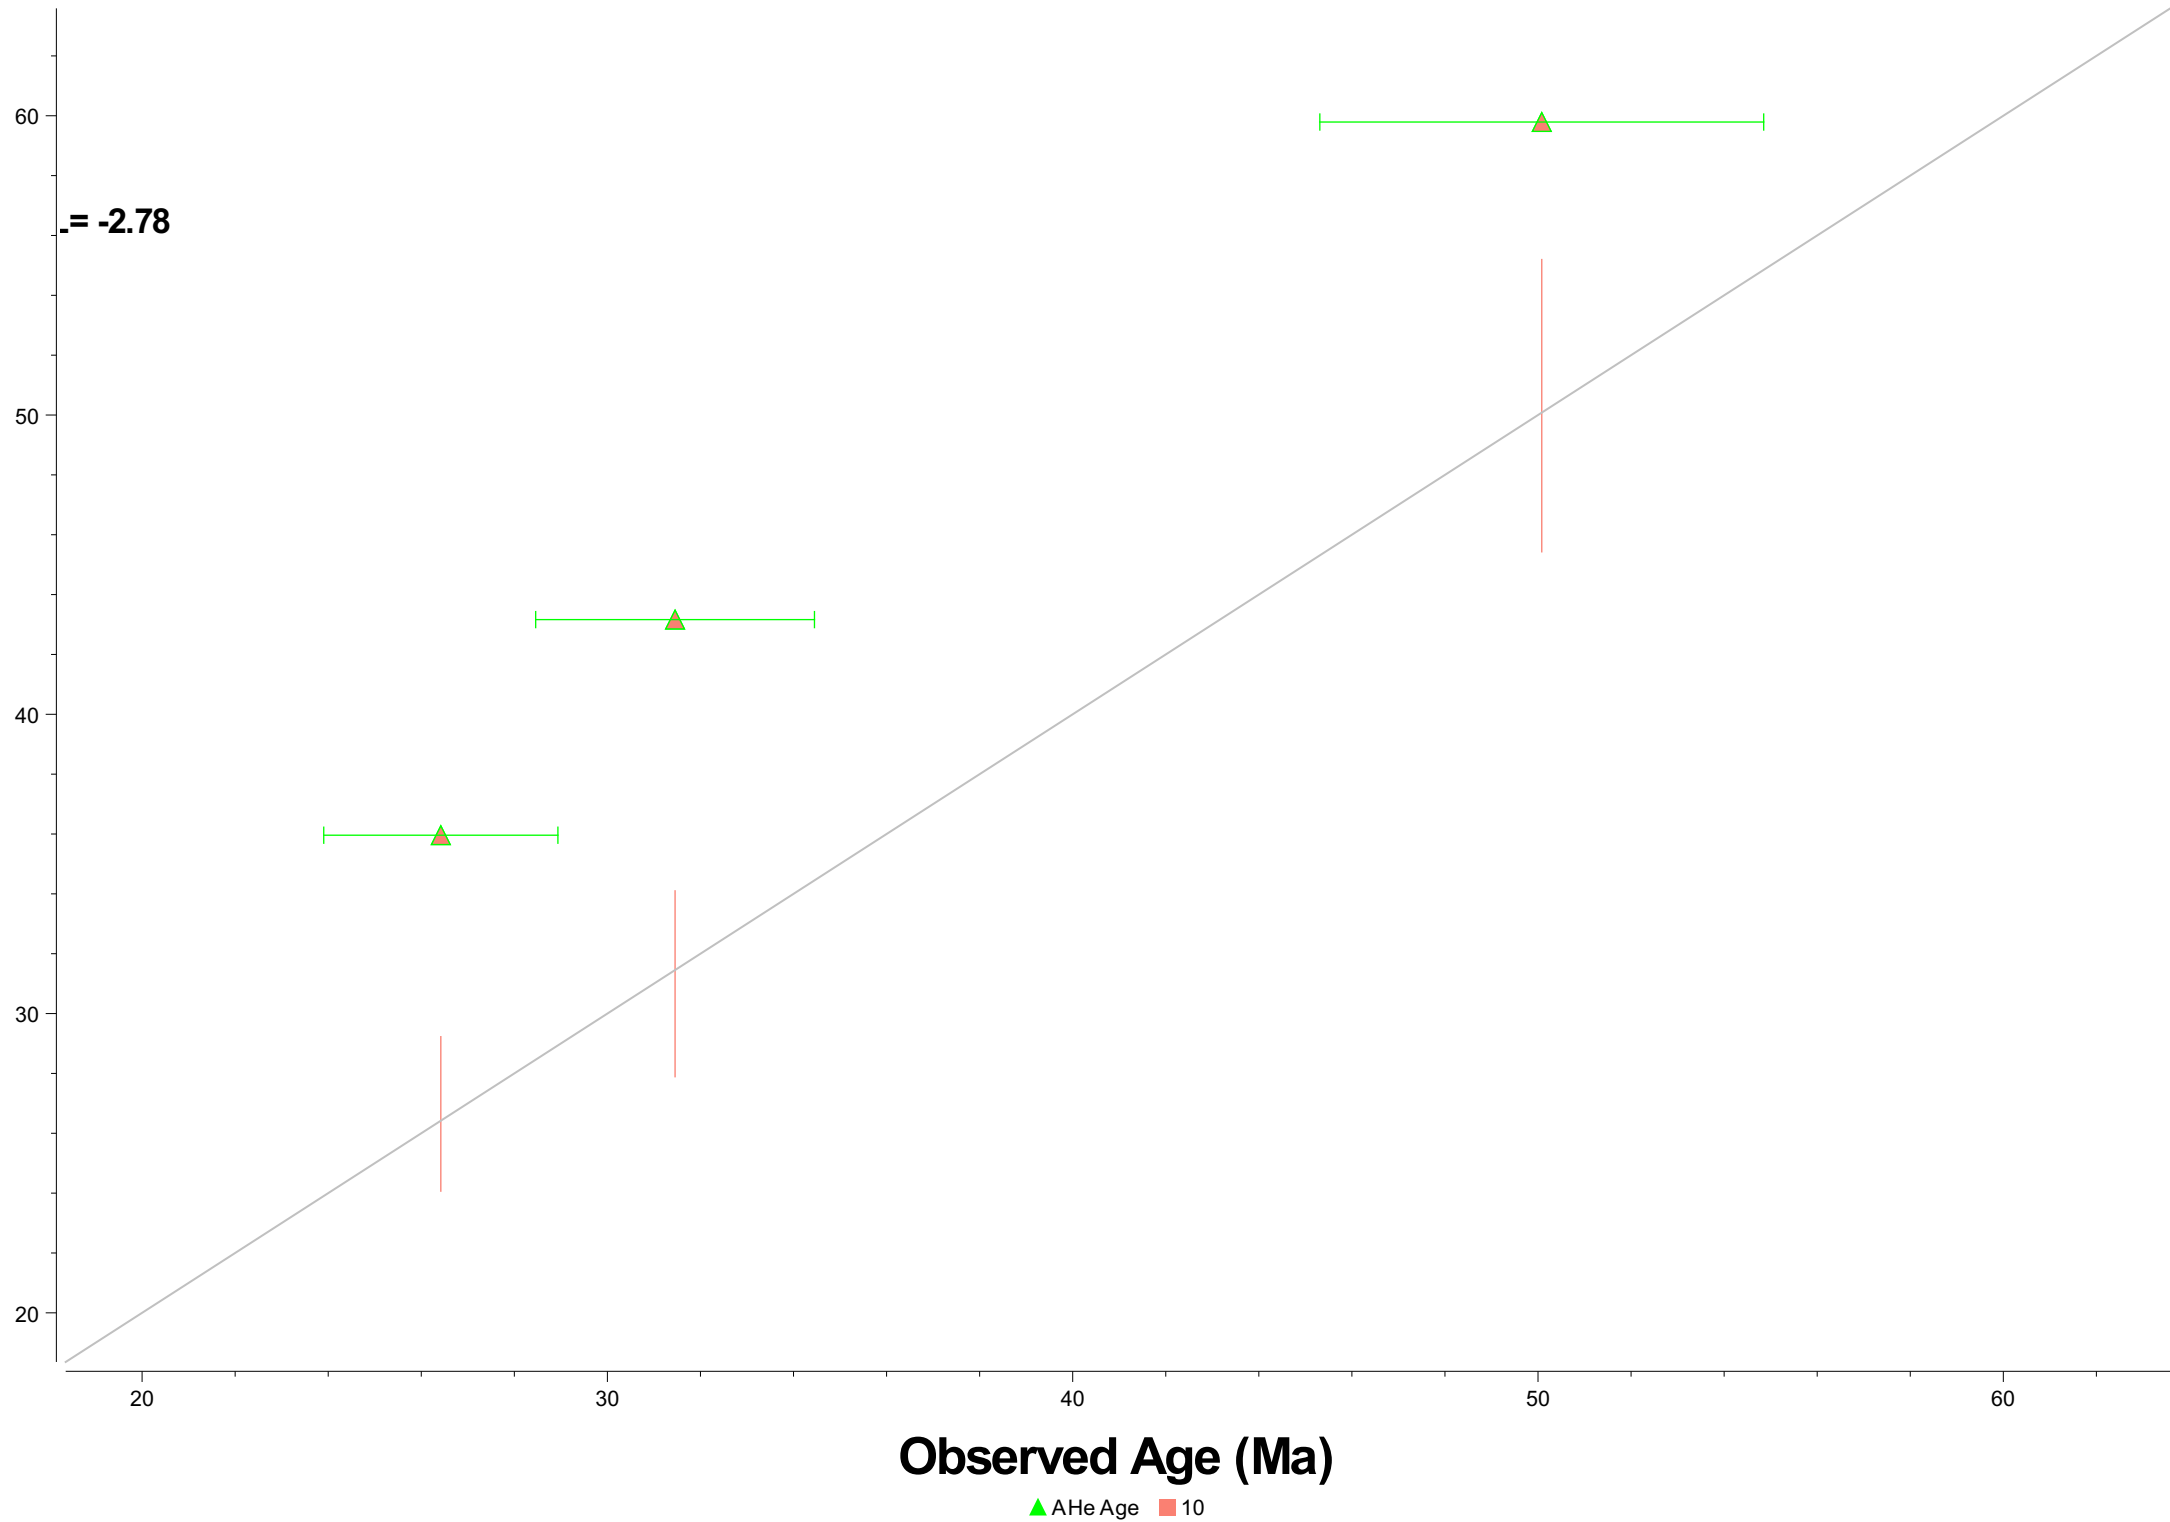

Supplement: Supplementary file 86 [file 1]

# Exercise3\_IM\_4\_Exercise3\_InputData.txt : Max. Likelihood

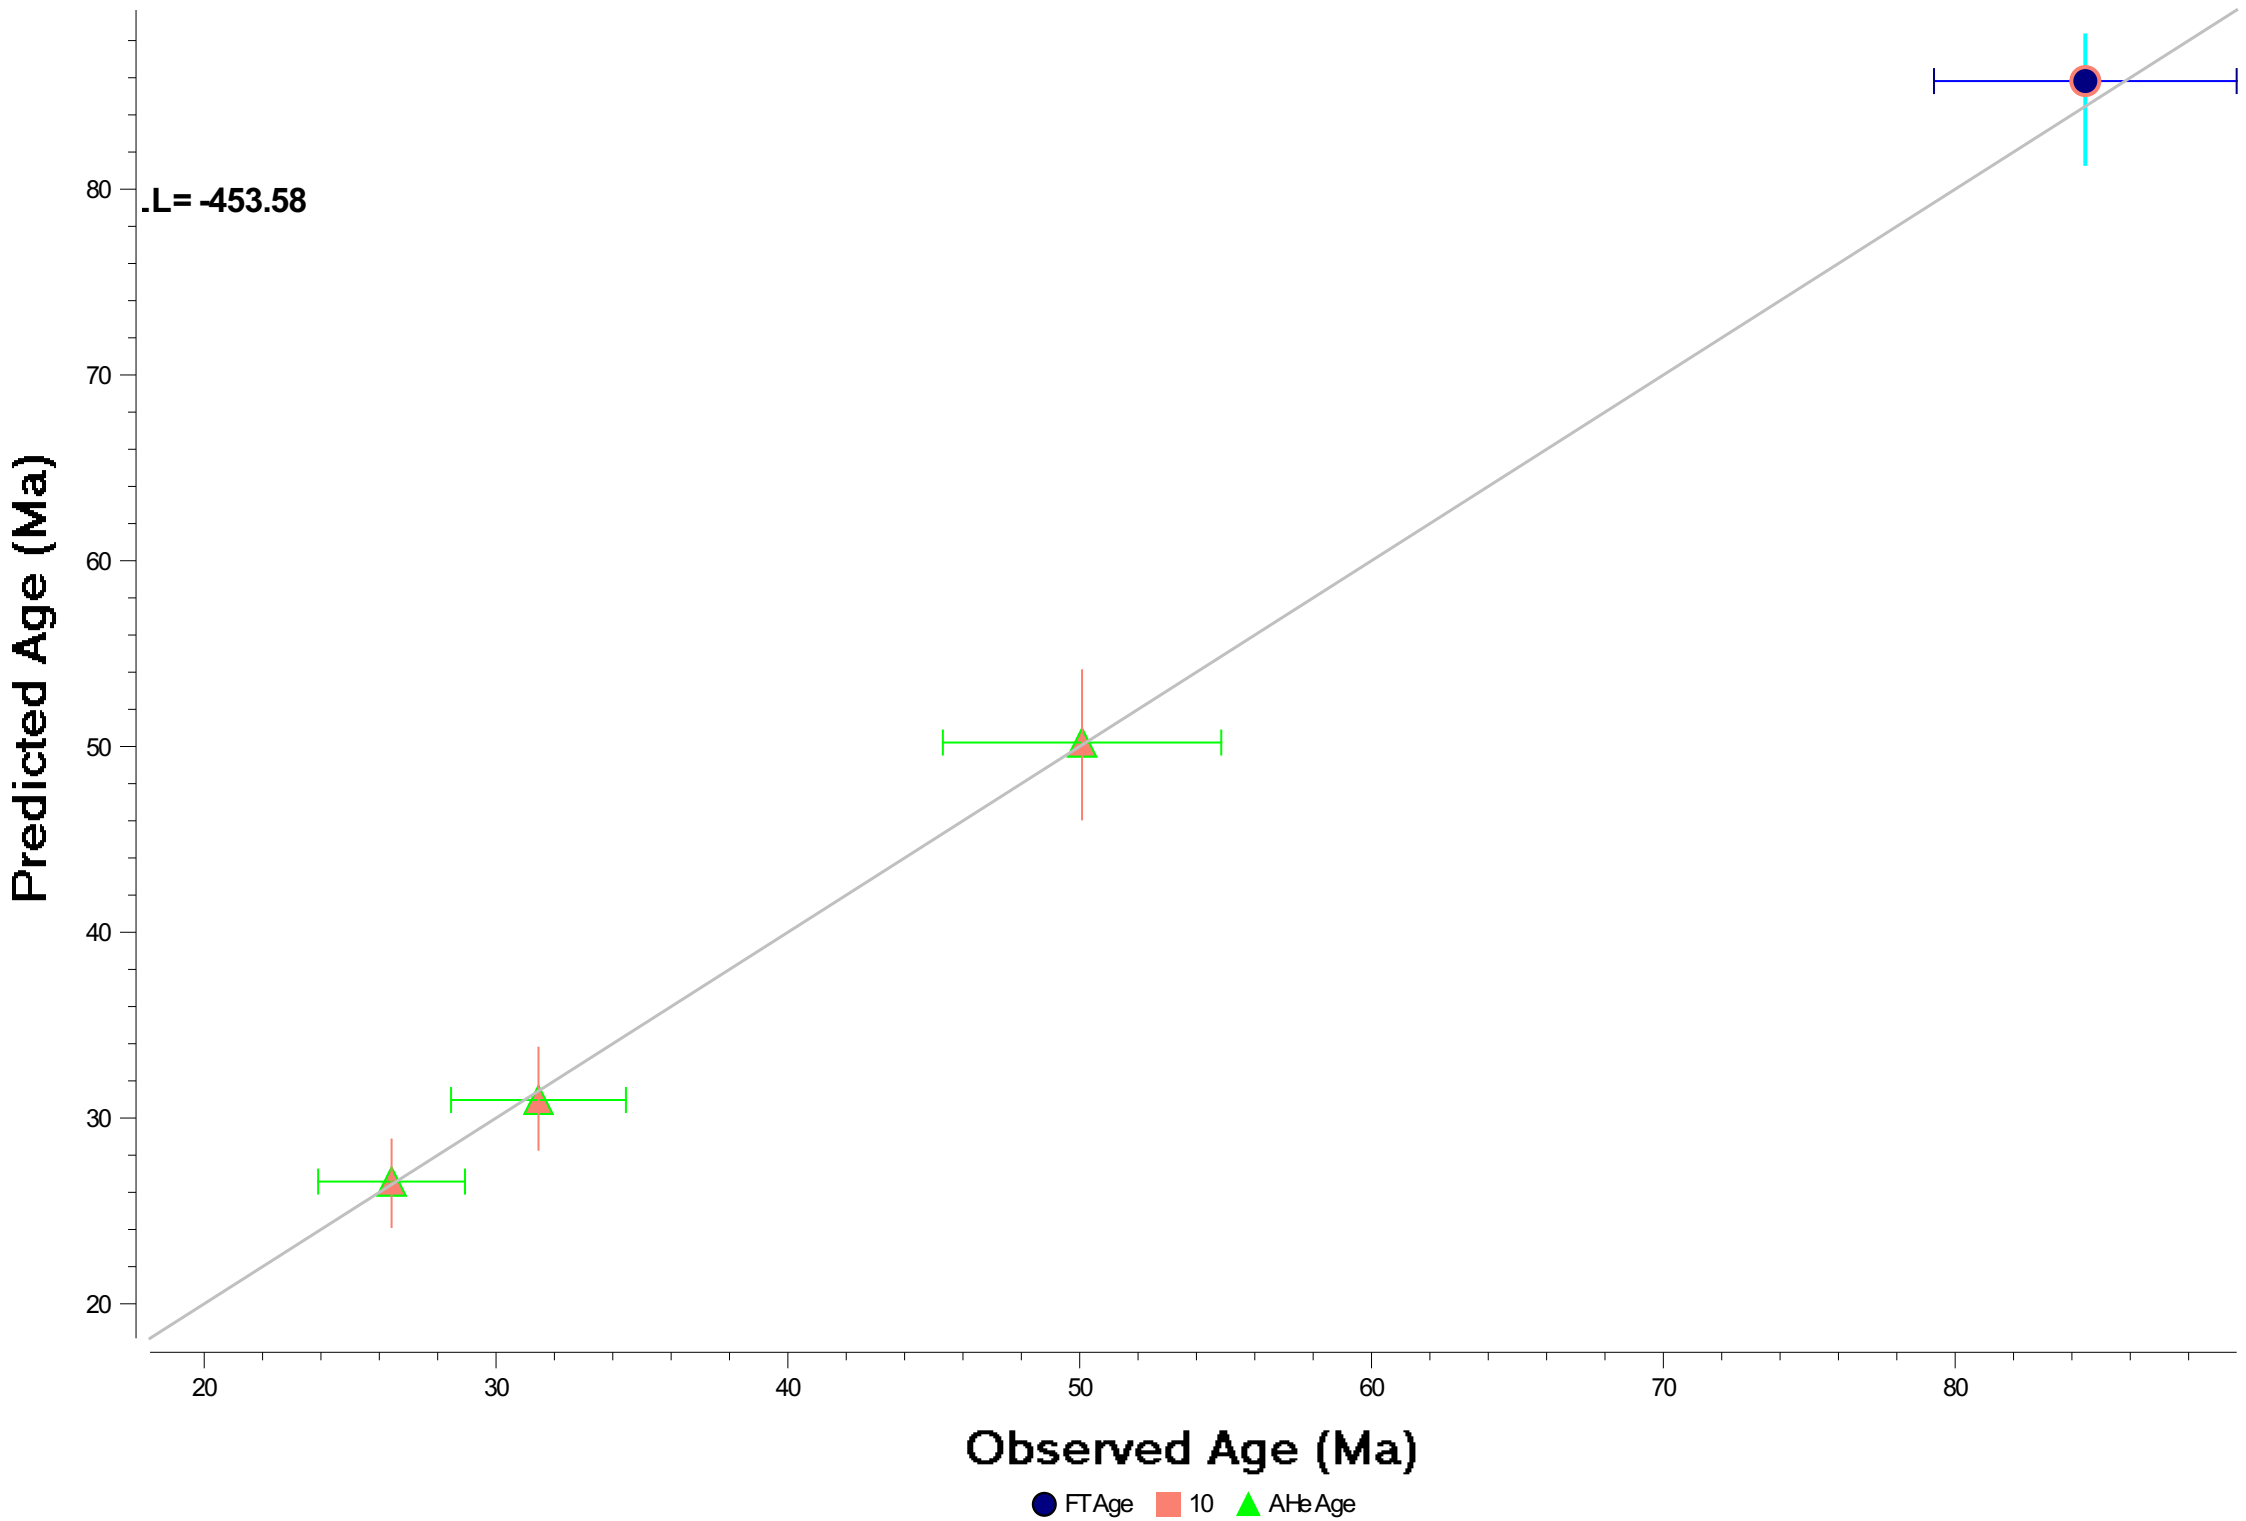

Supplement: Supplementary file 87 [file 1]

# Exercise4\_GROUPA-1\_3\_Exercise4\_InputData.txt

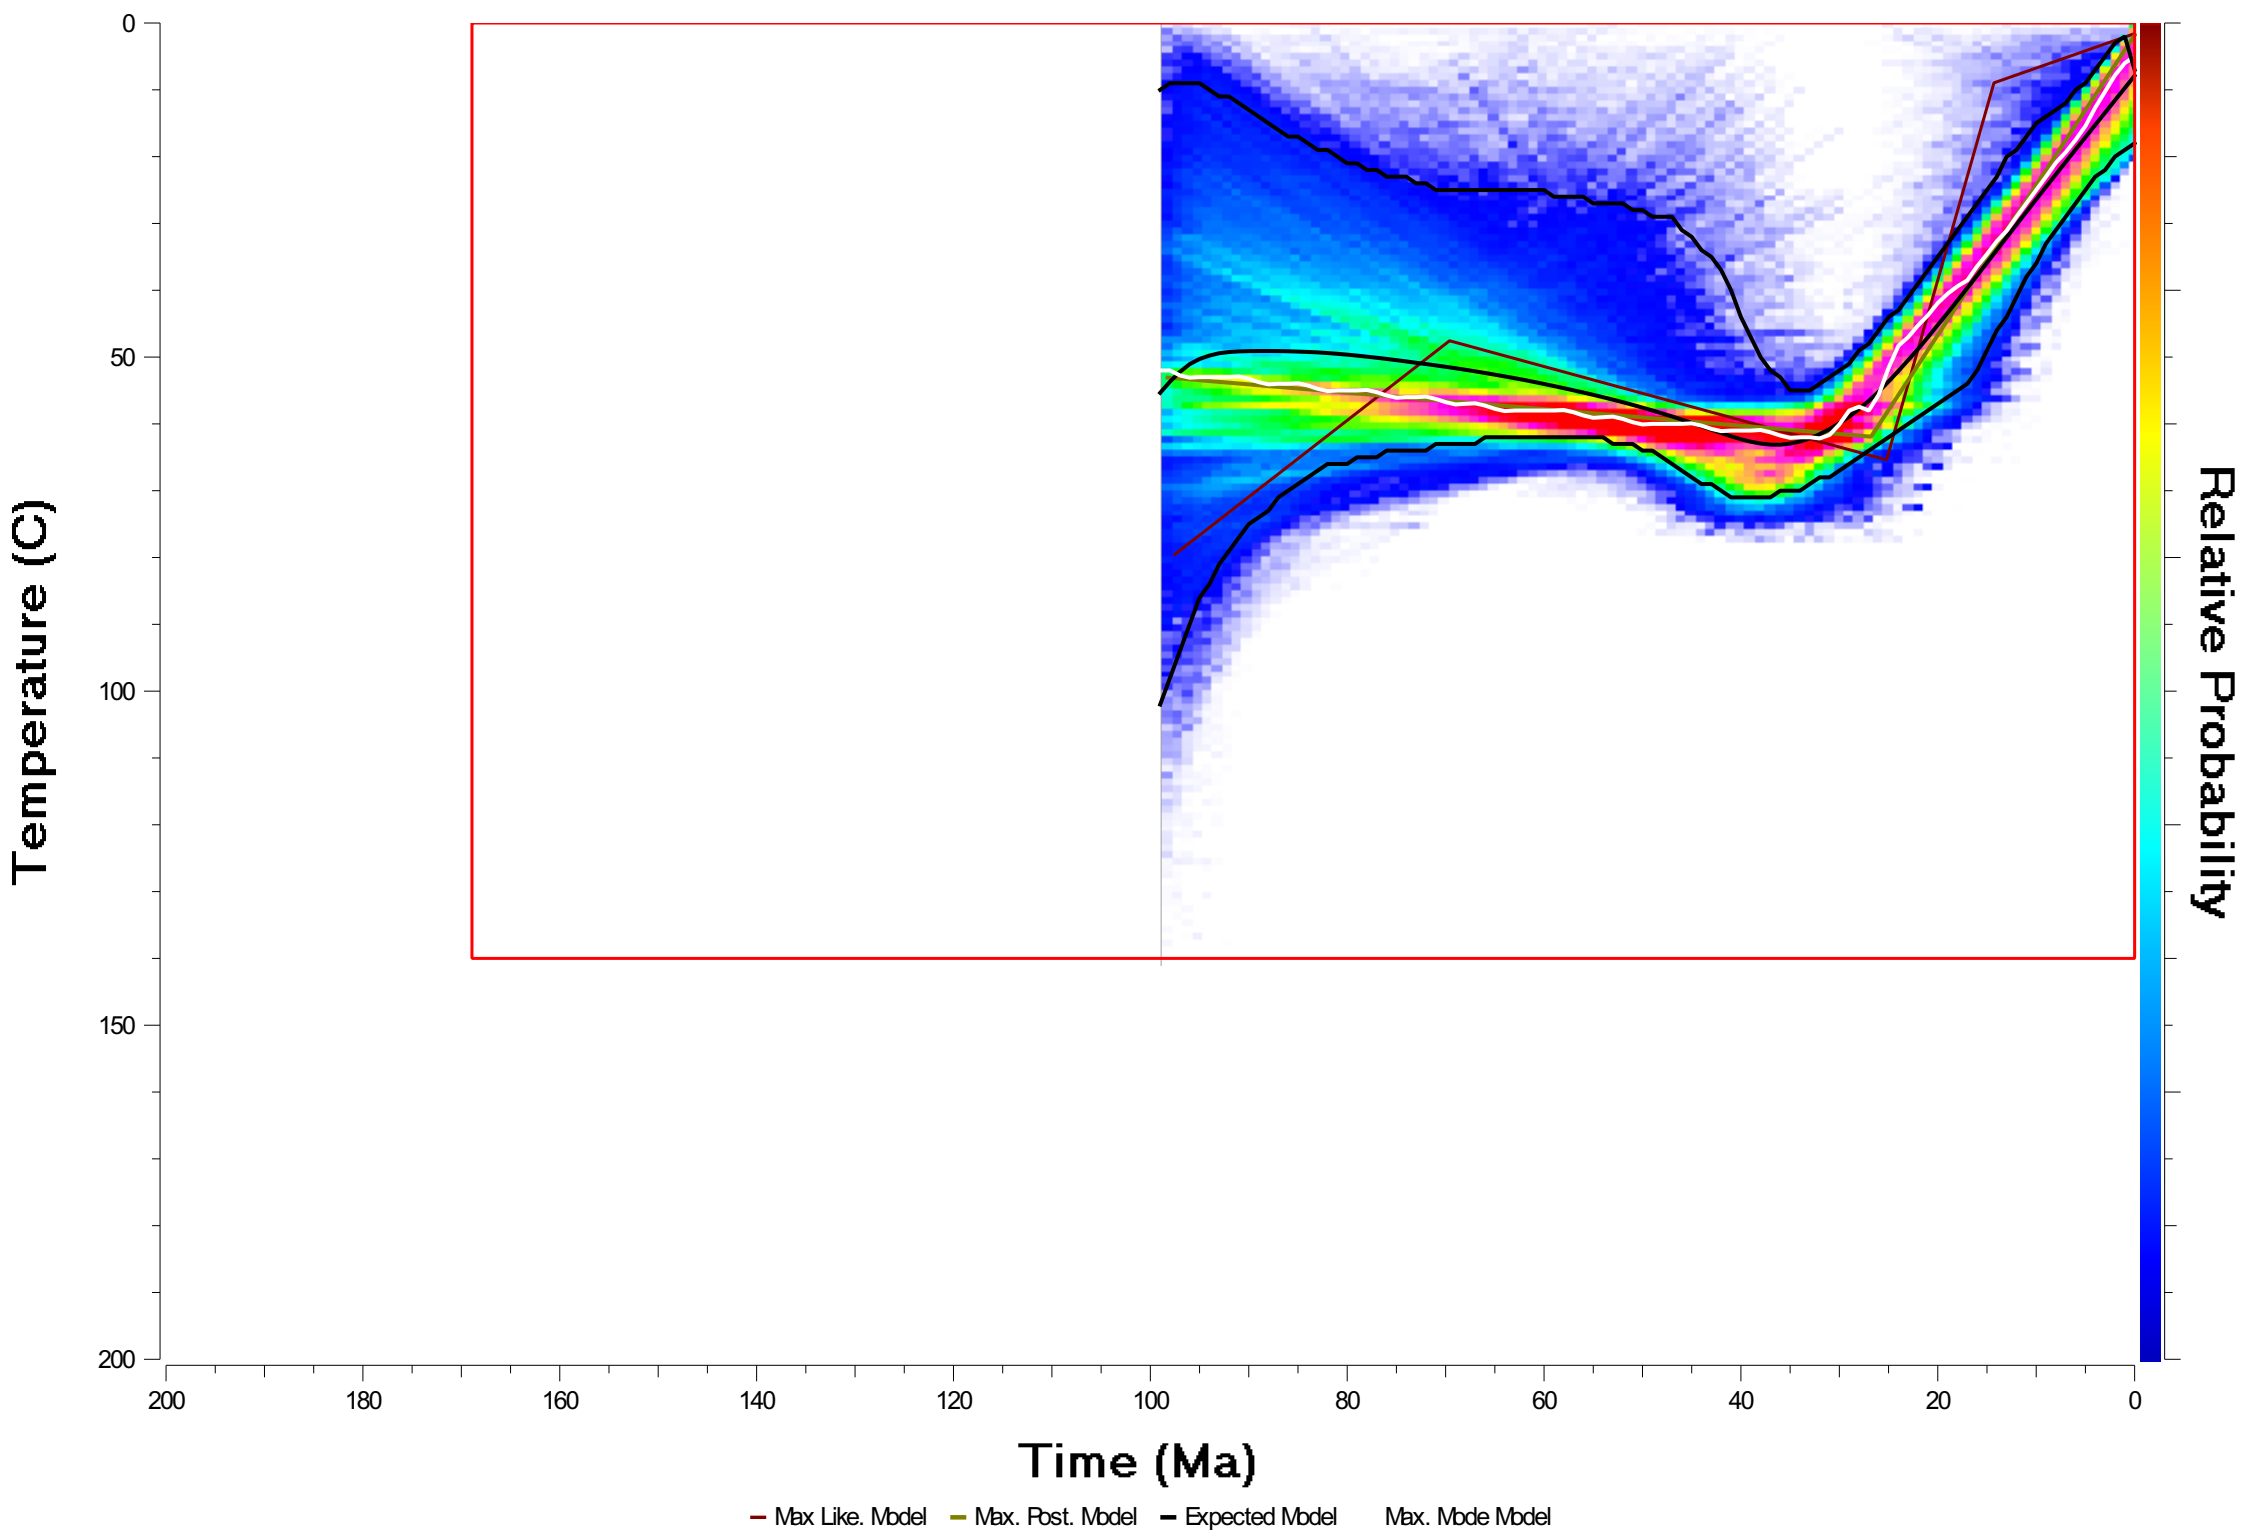

Supplement: Supplementary file 88 [file 1]

Predicted Age (Ma)

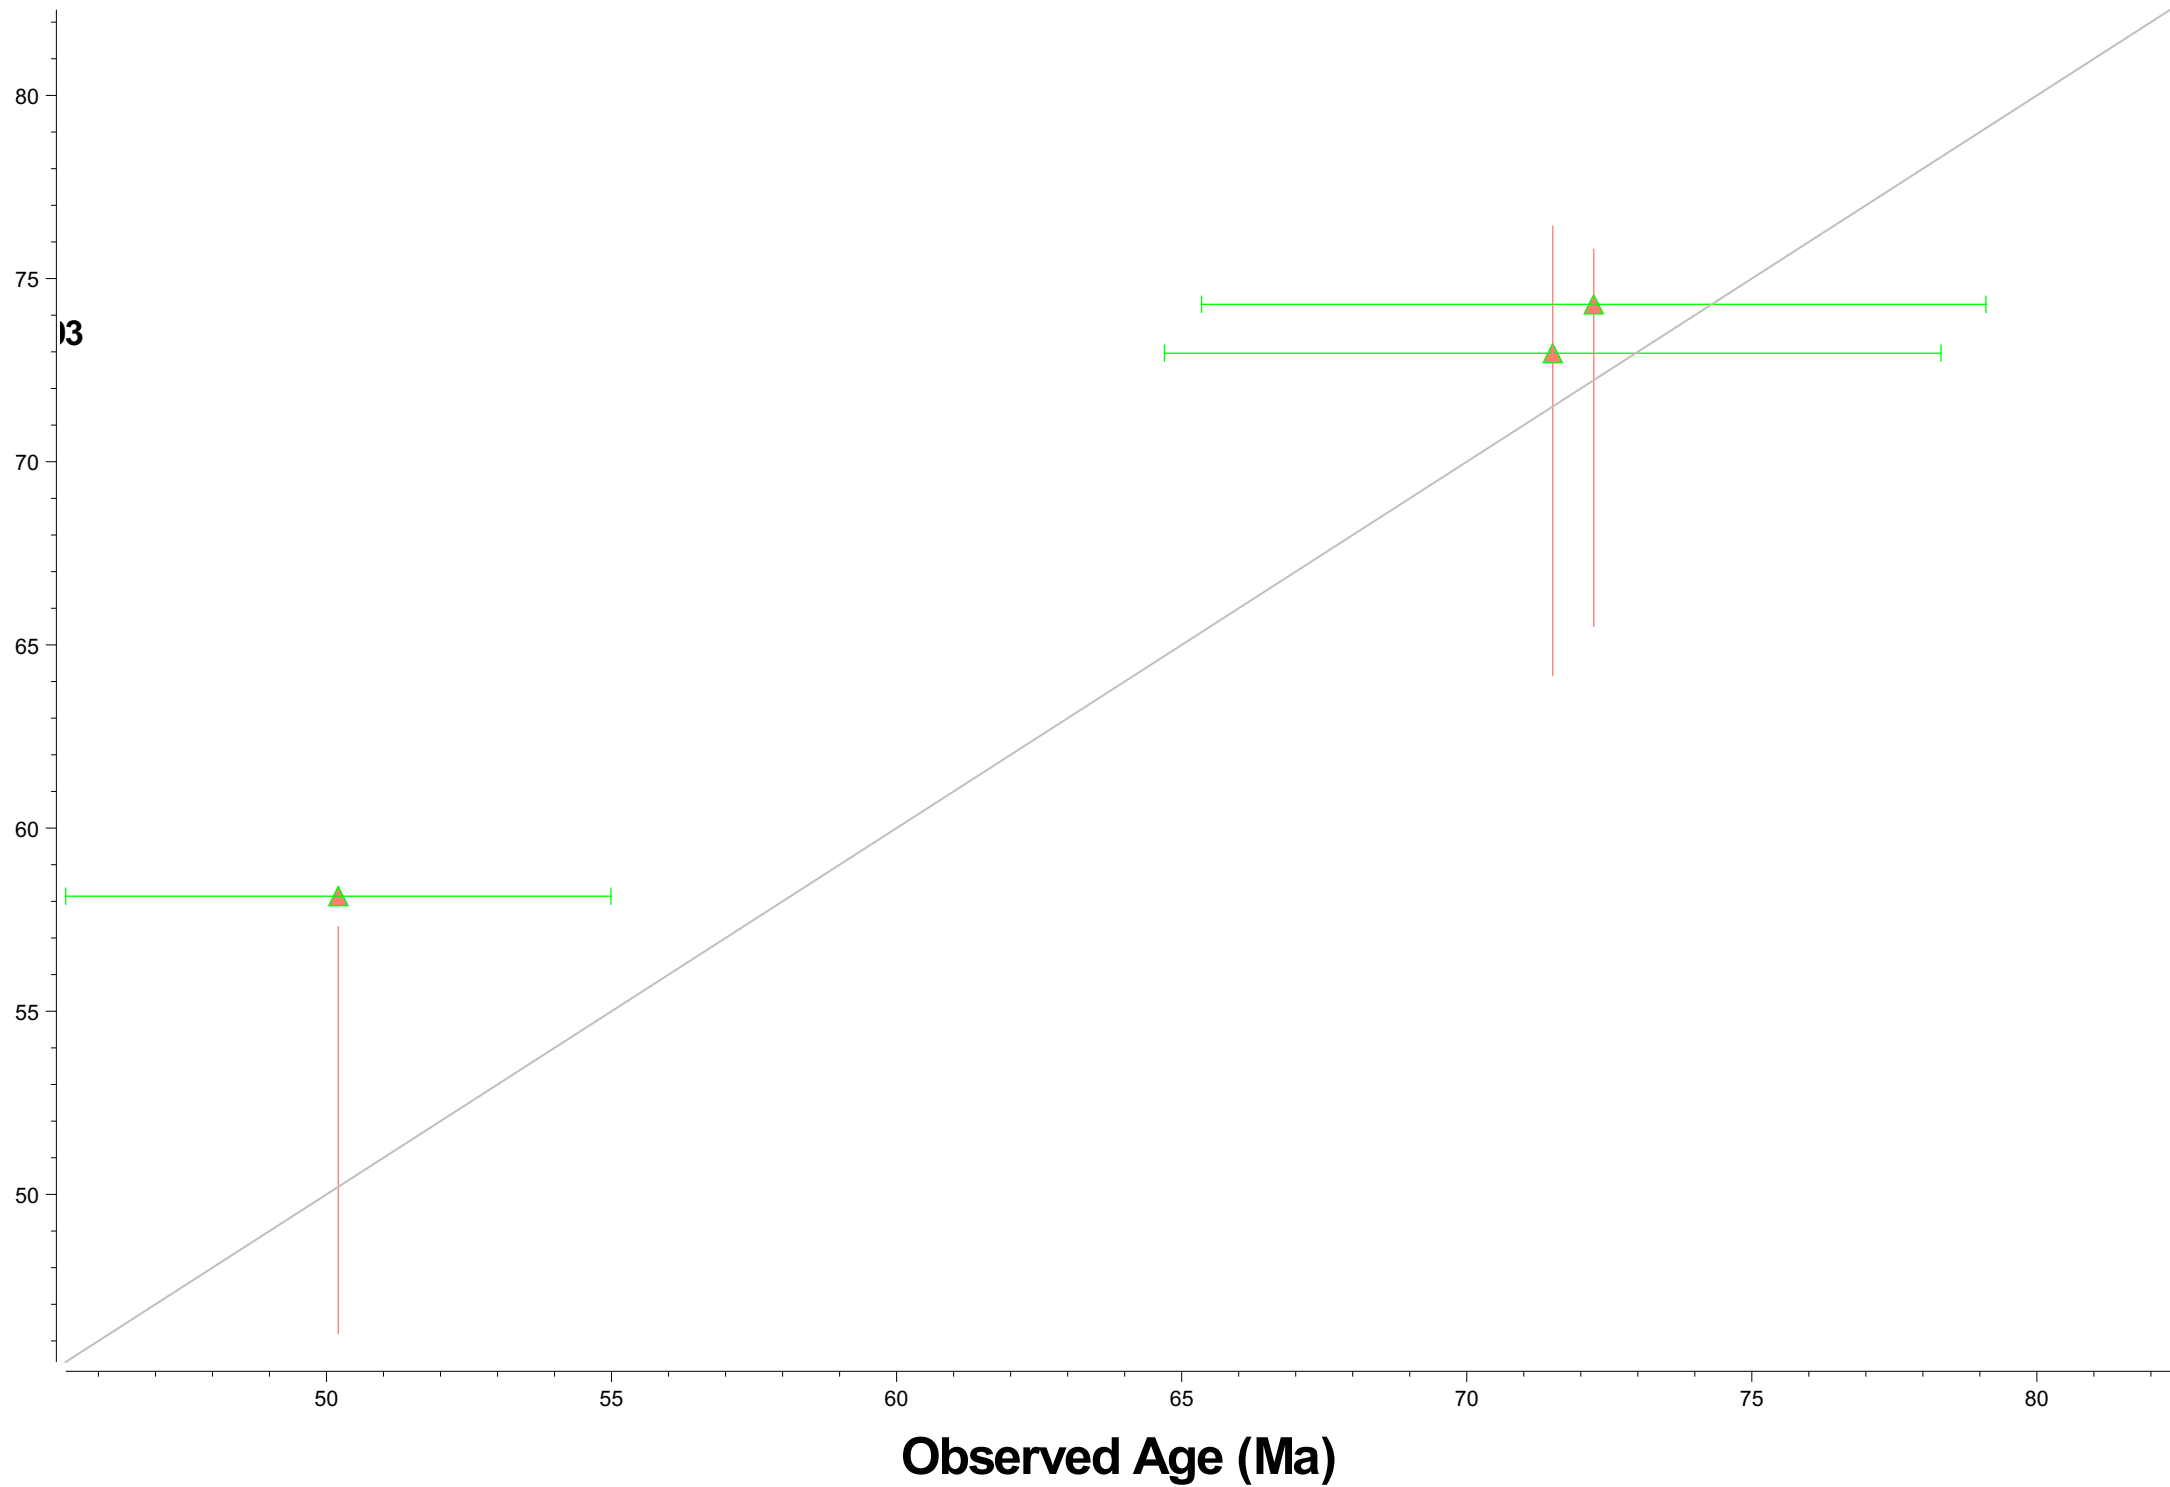

Observed Age (Ma)

▲ AHe Age ■ 10

Supplement: Supplementary file 89 [file 1]

# Exercise3\_IM\_4\_Exercise3\_InputData.txt 10.00m : Max. Like

No. of tracks (m)

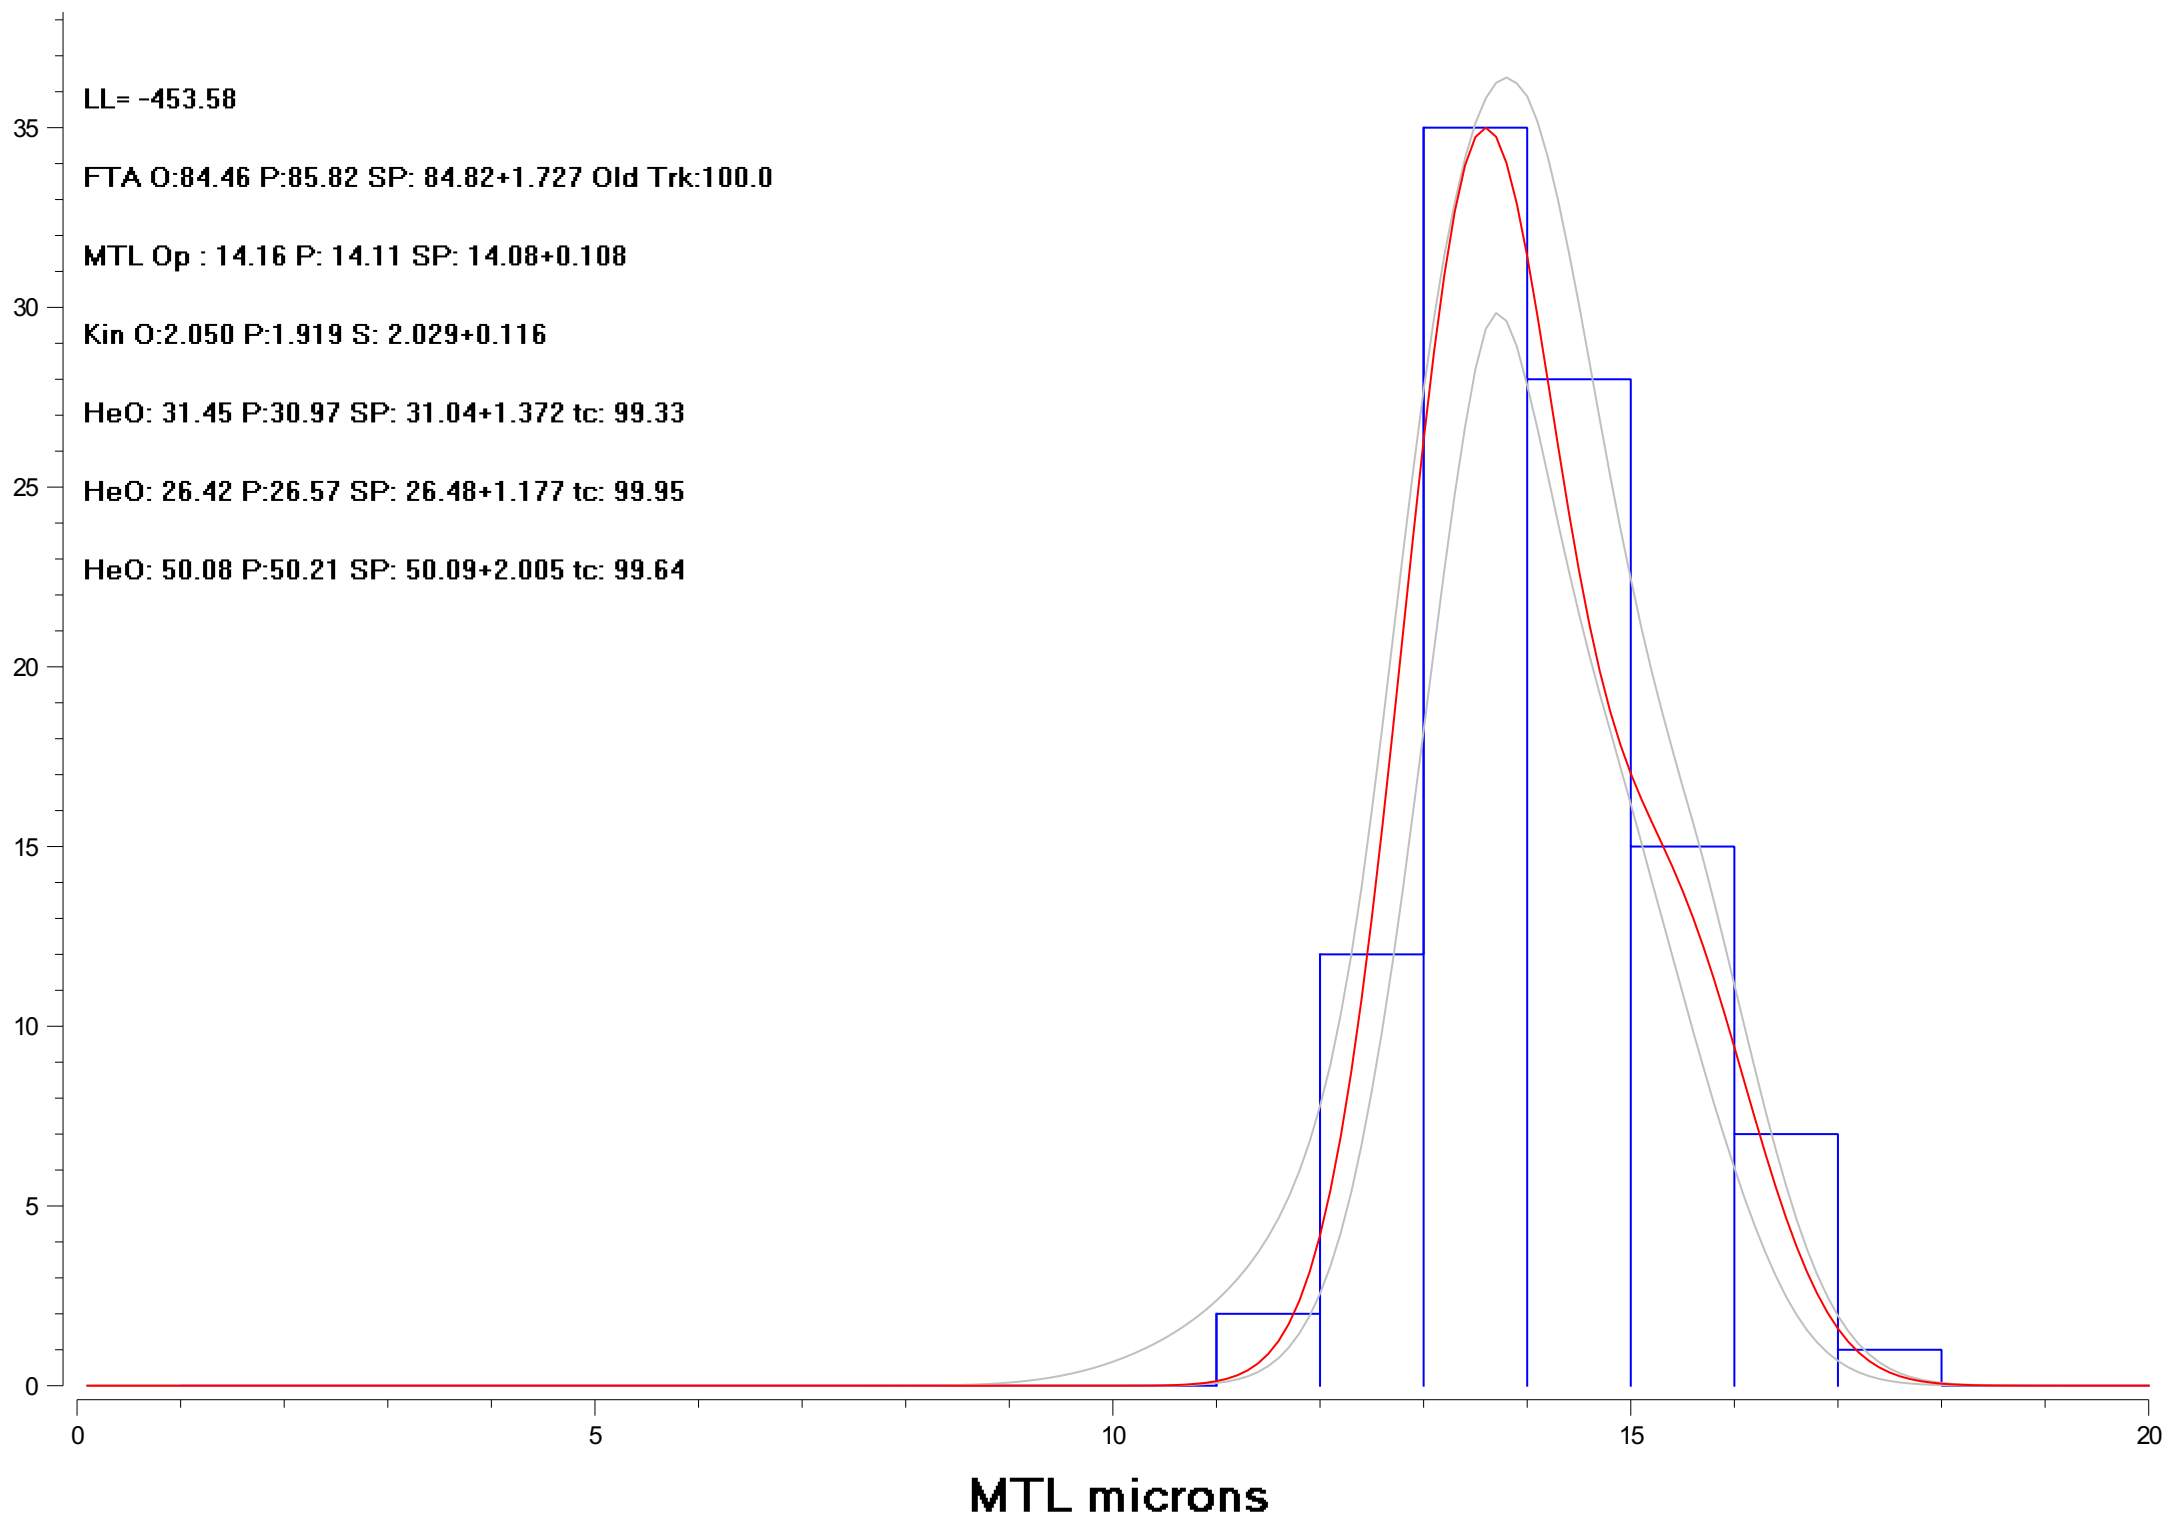

Supplement: Supplementary file 90 [file 1]

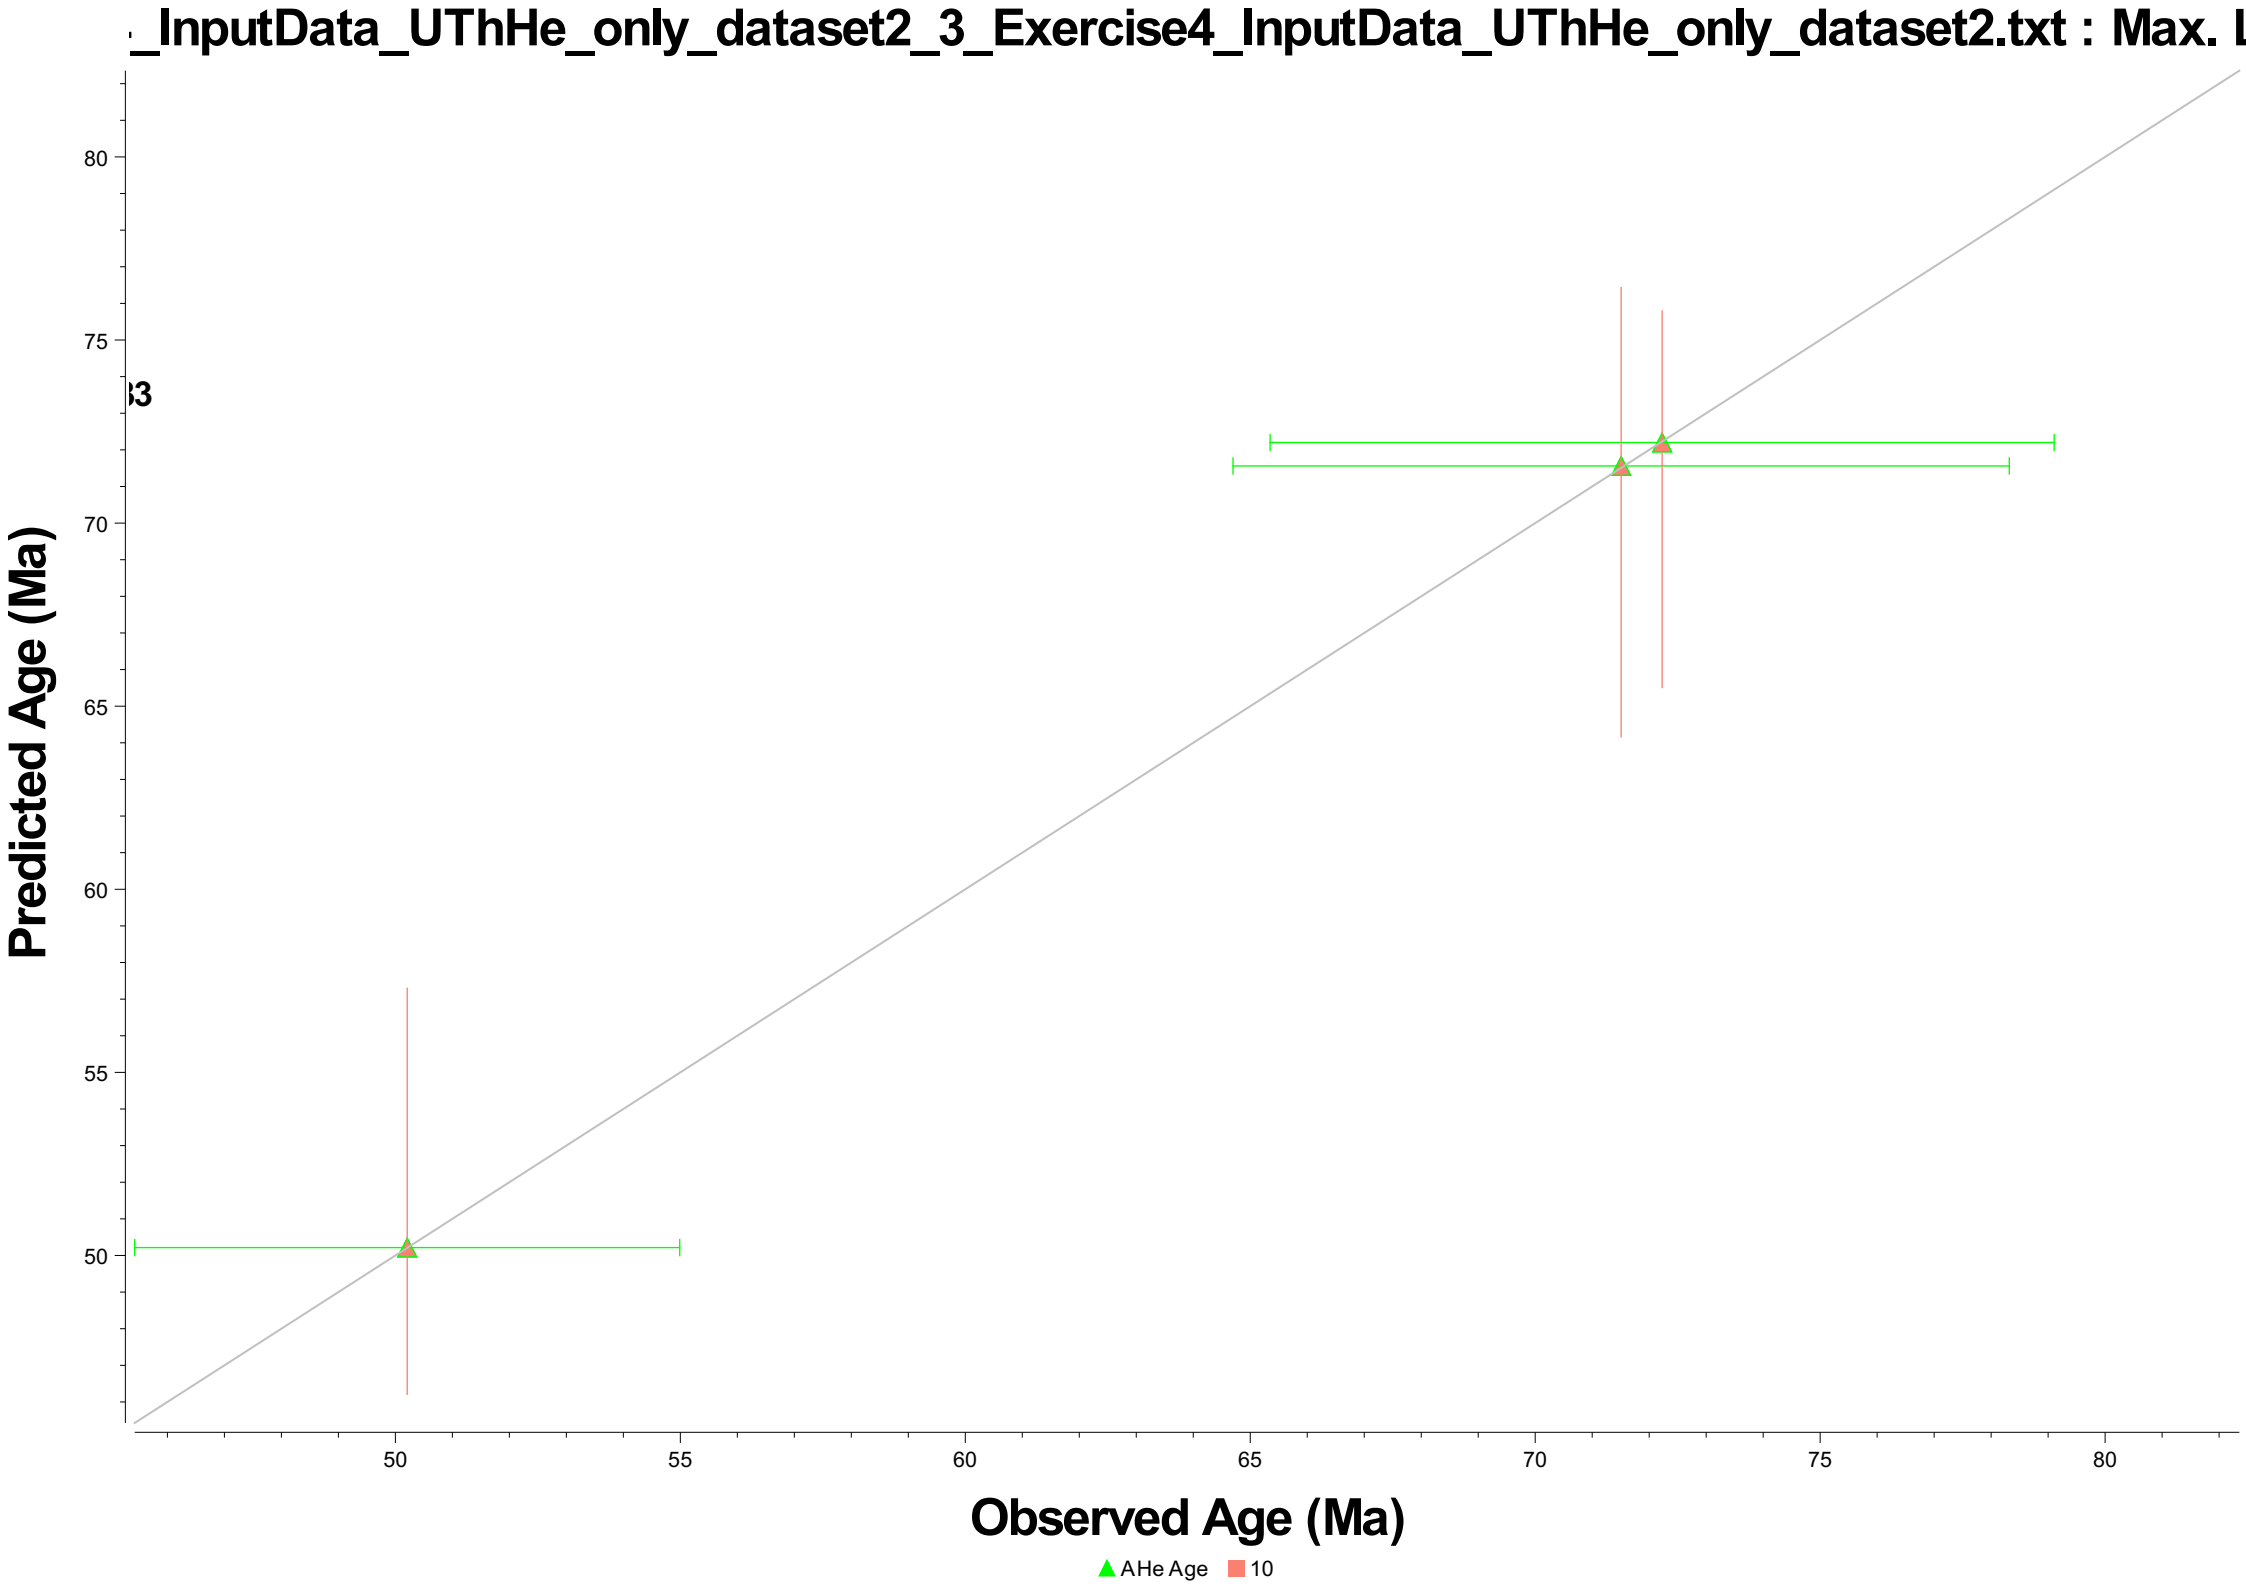

Supplement: Supplementary file 91 [file 1]

# Exercise4\_GROUPD-2\_3 : Max Like

Temperature (C)

Time (Ma)

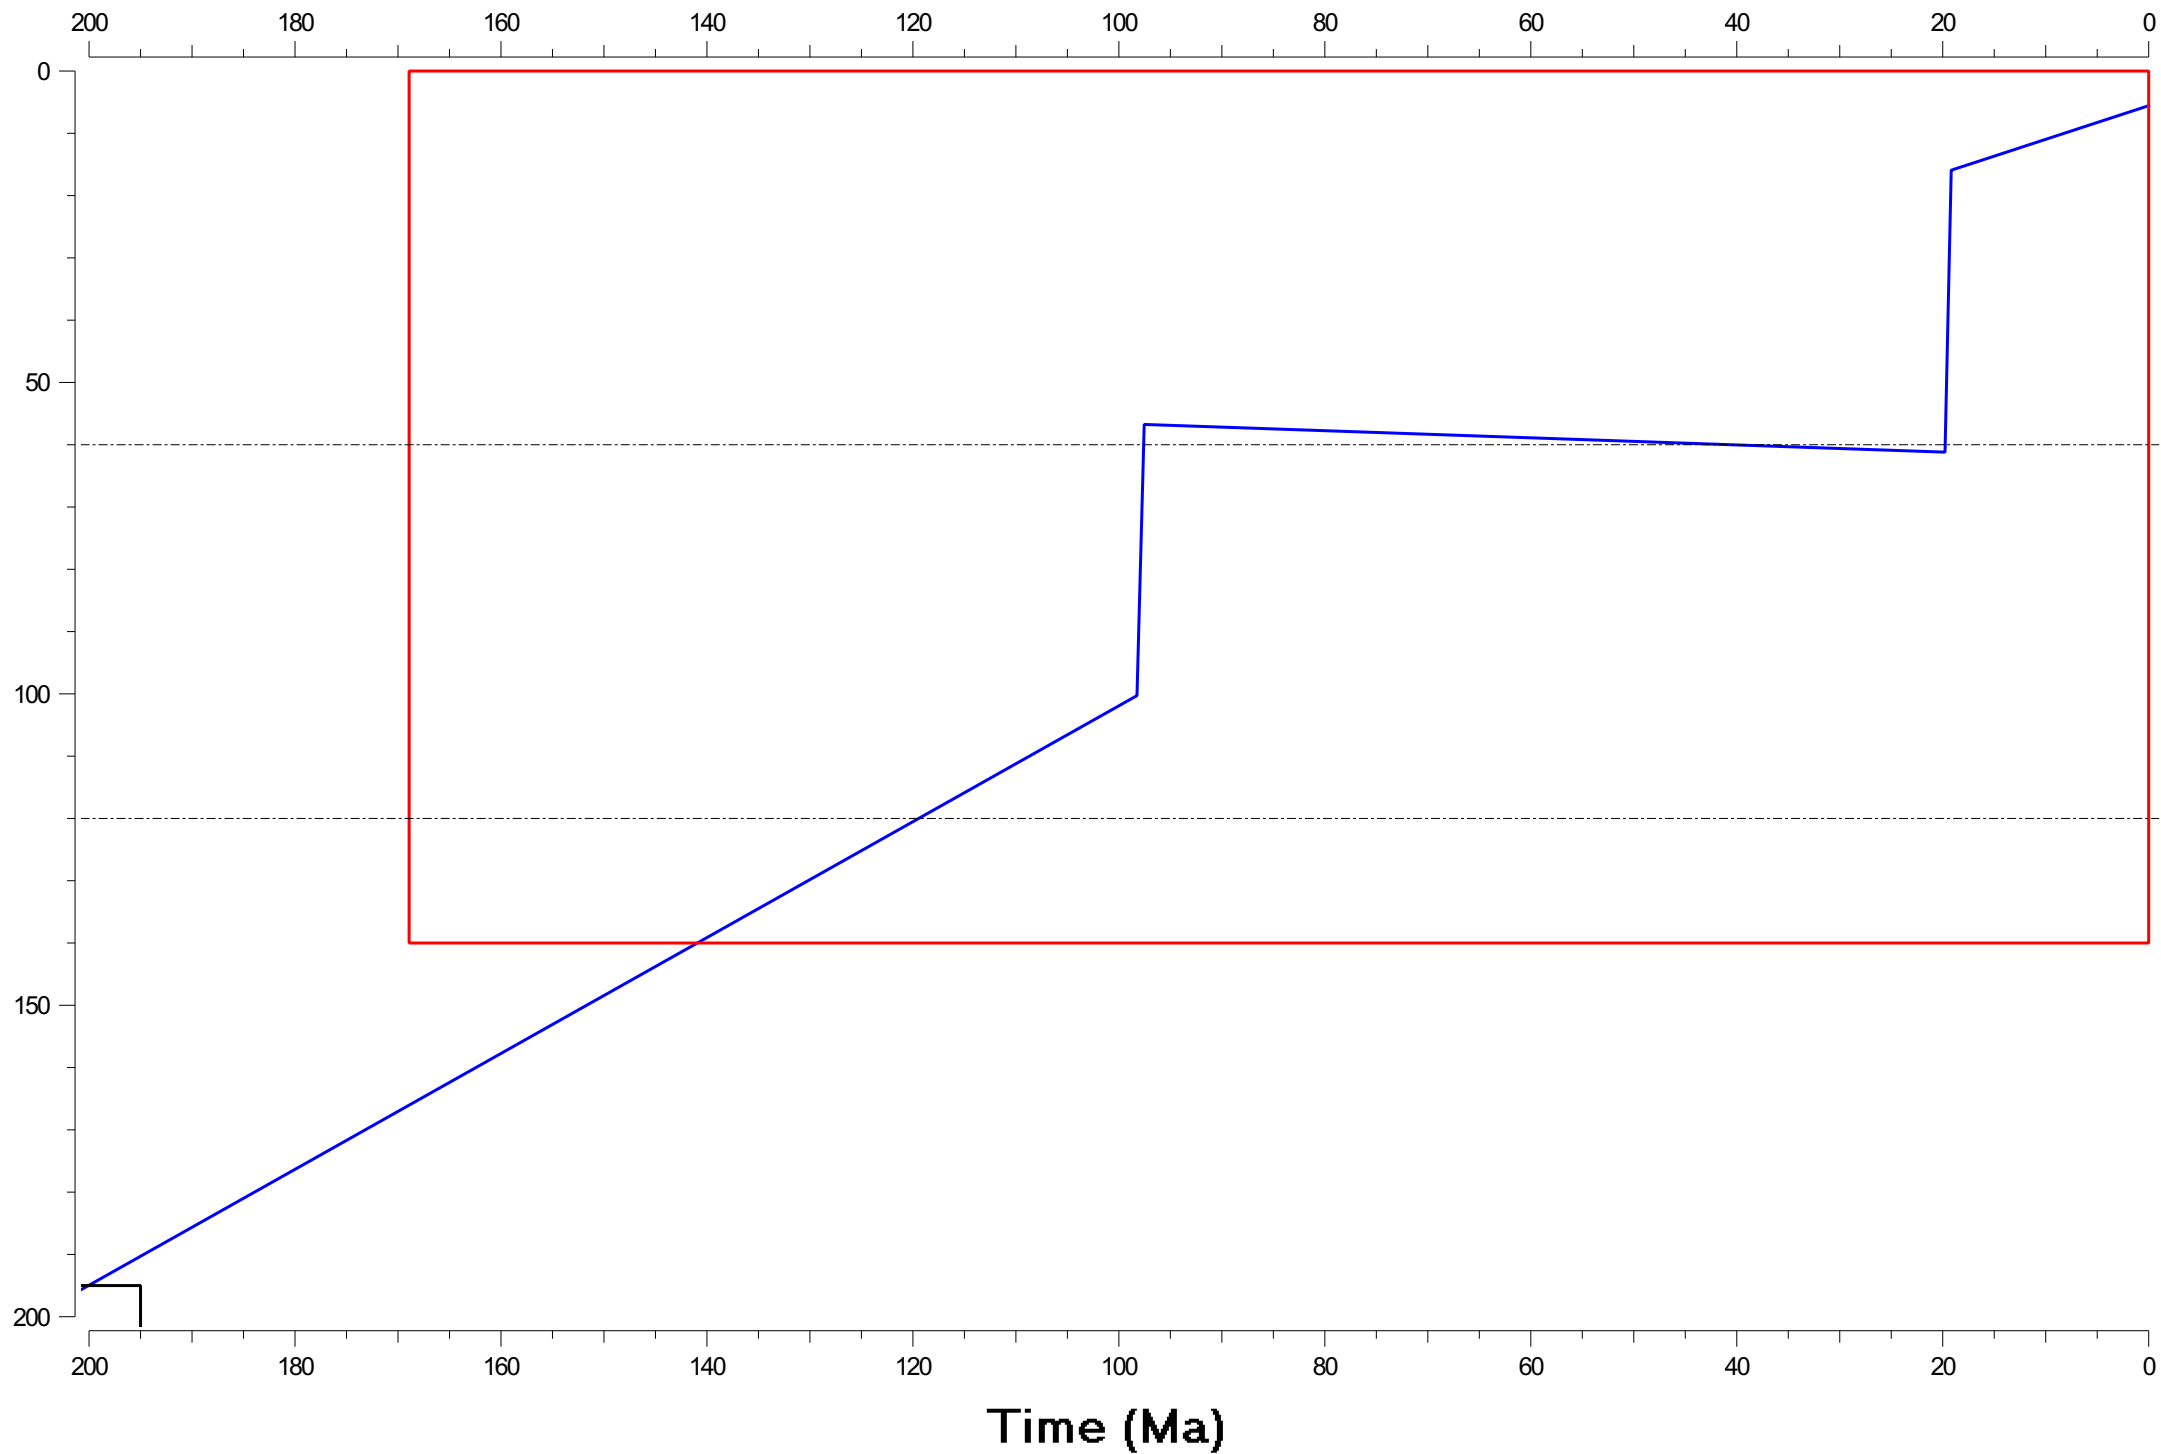

Supplement: Supplementary file 92 [file 1]

# Exercise4\_GROUPC-1\_3

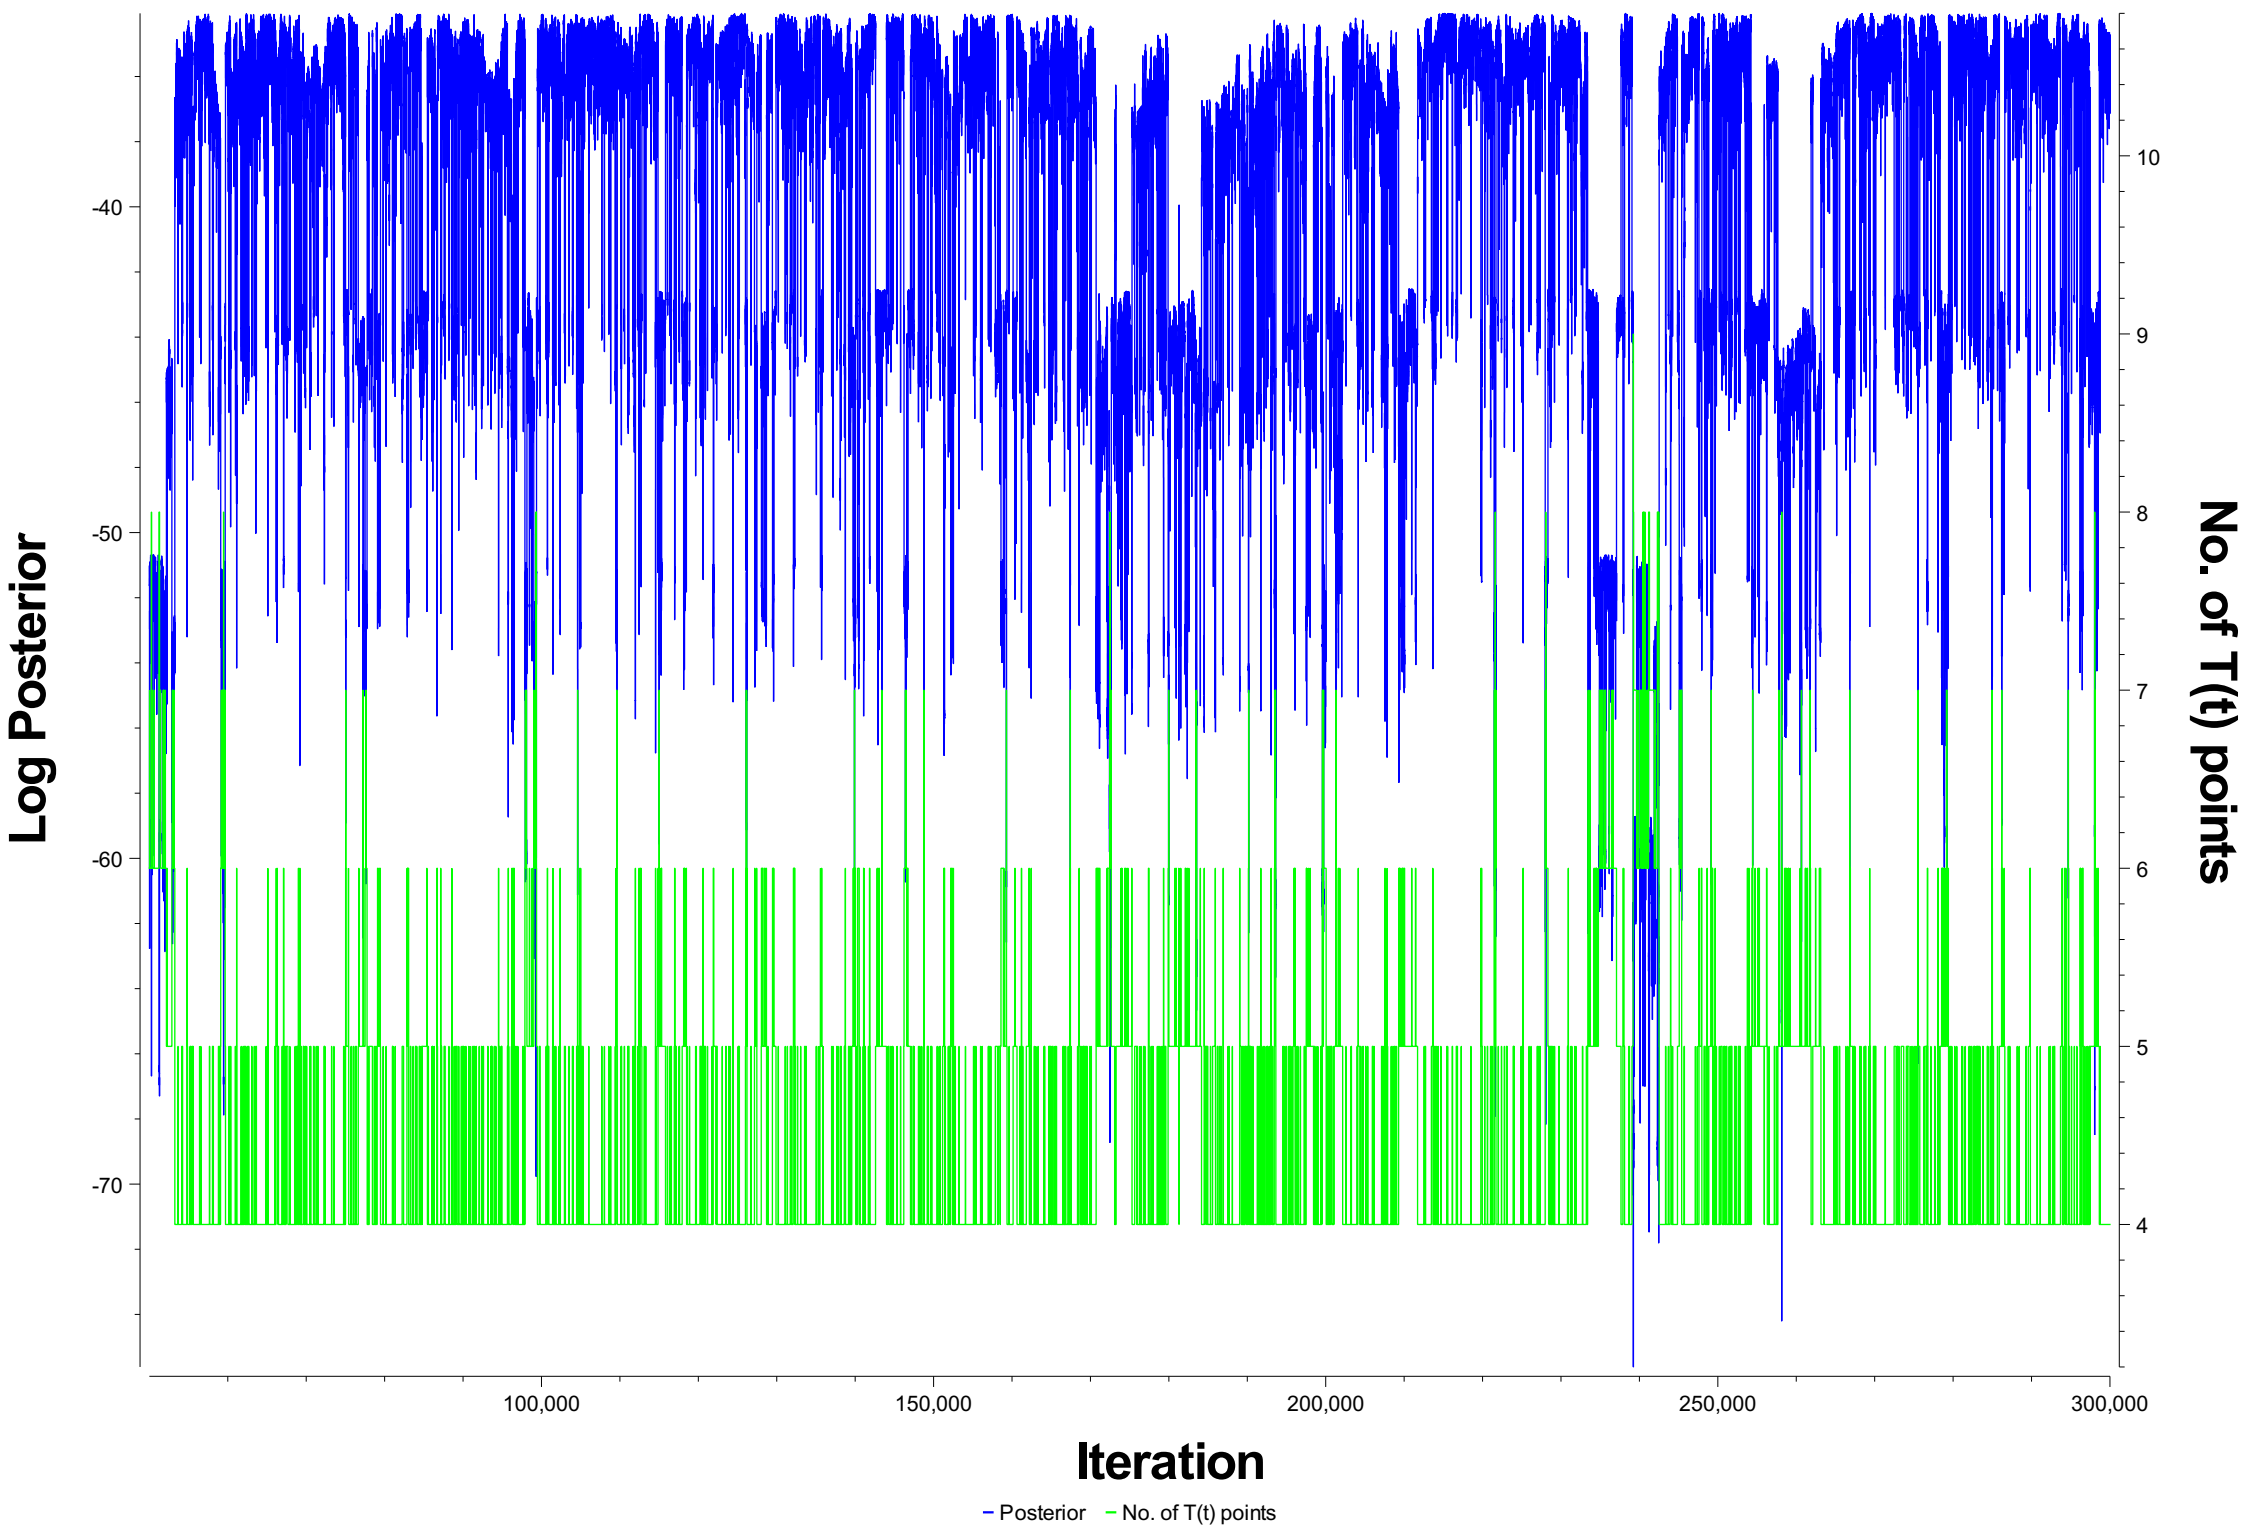

Supplement: Supplementary file 93 [file 1]

# Exercise4\_GROUPA-1\_3 : Max Like

Time (Ma)

Temperature (C)

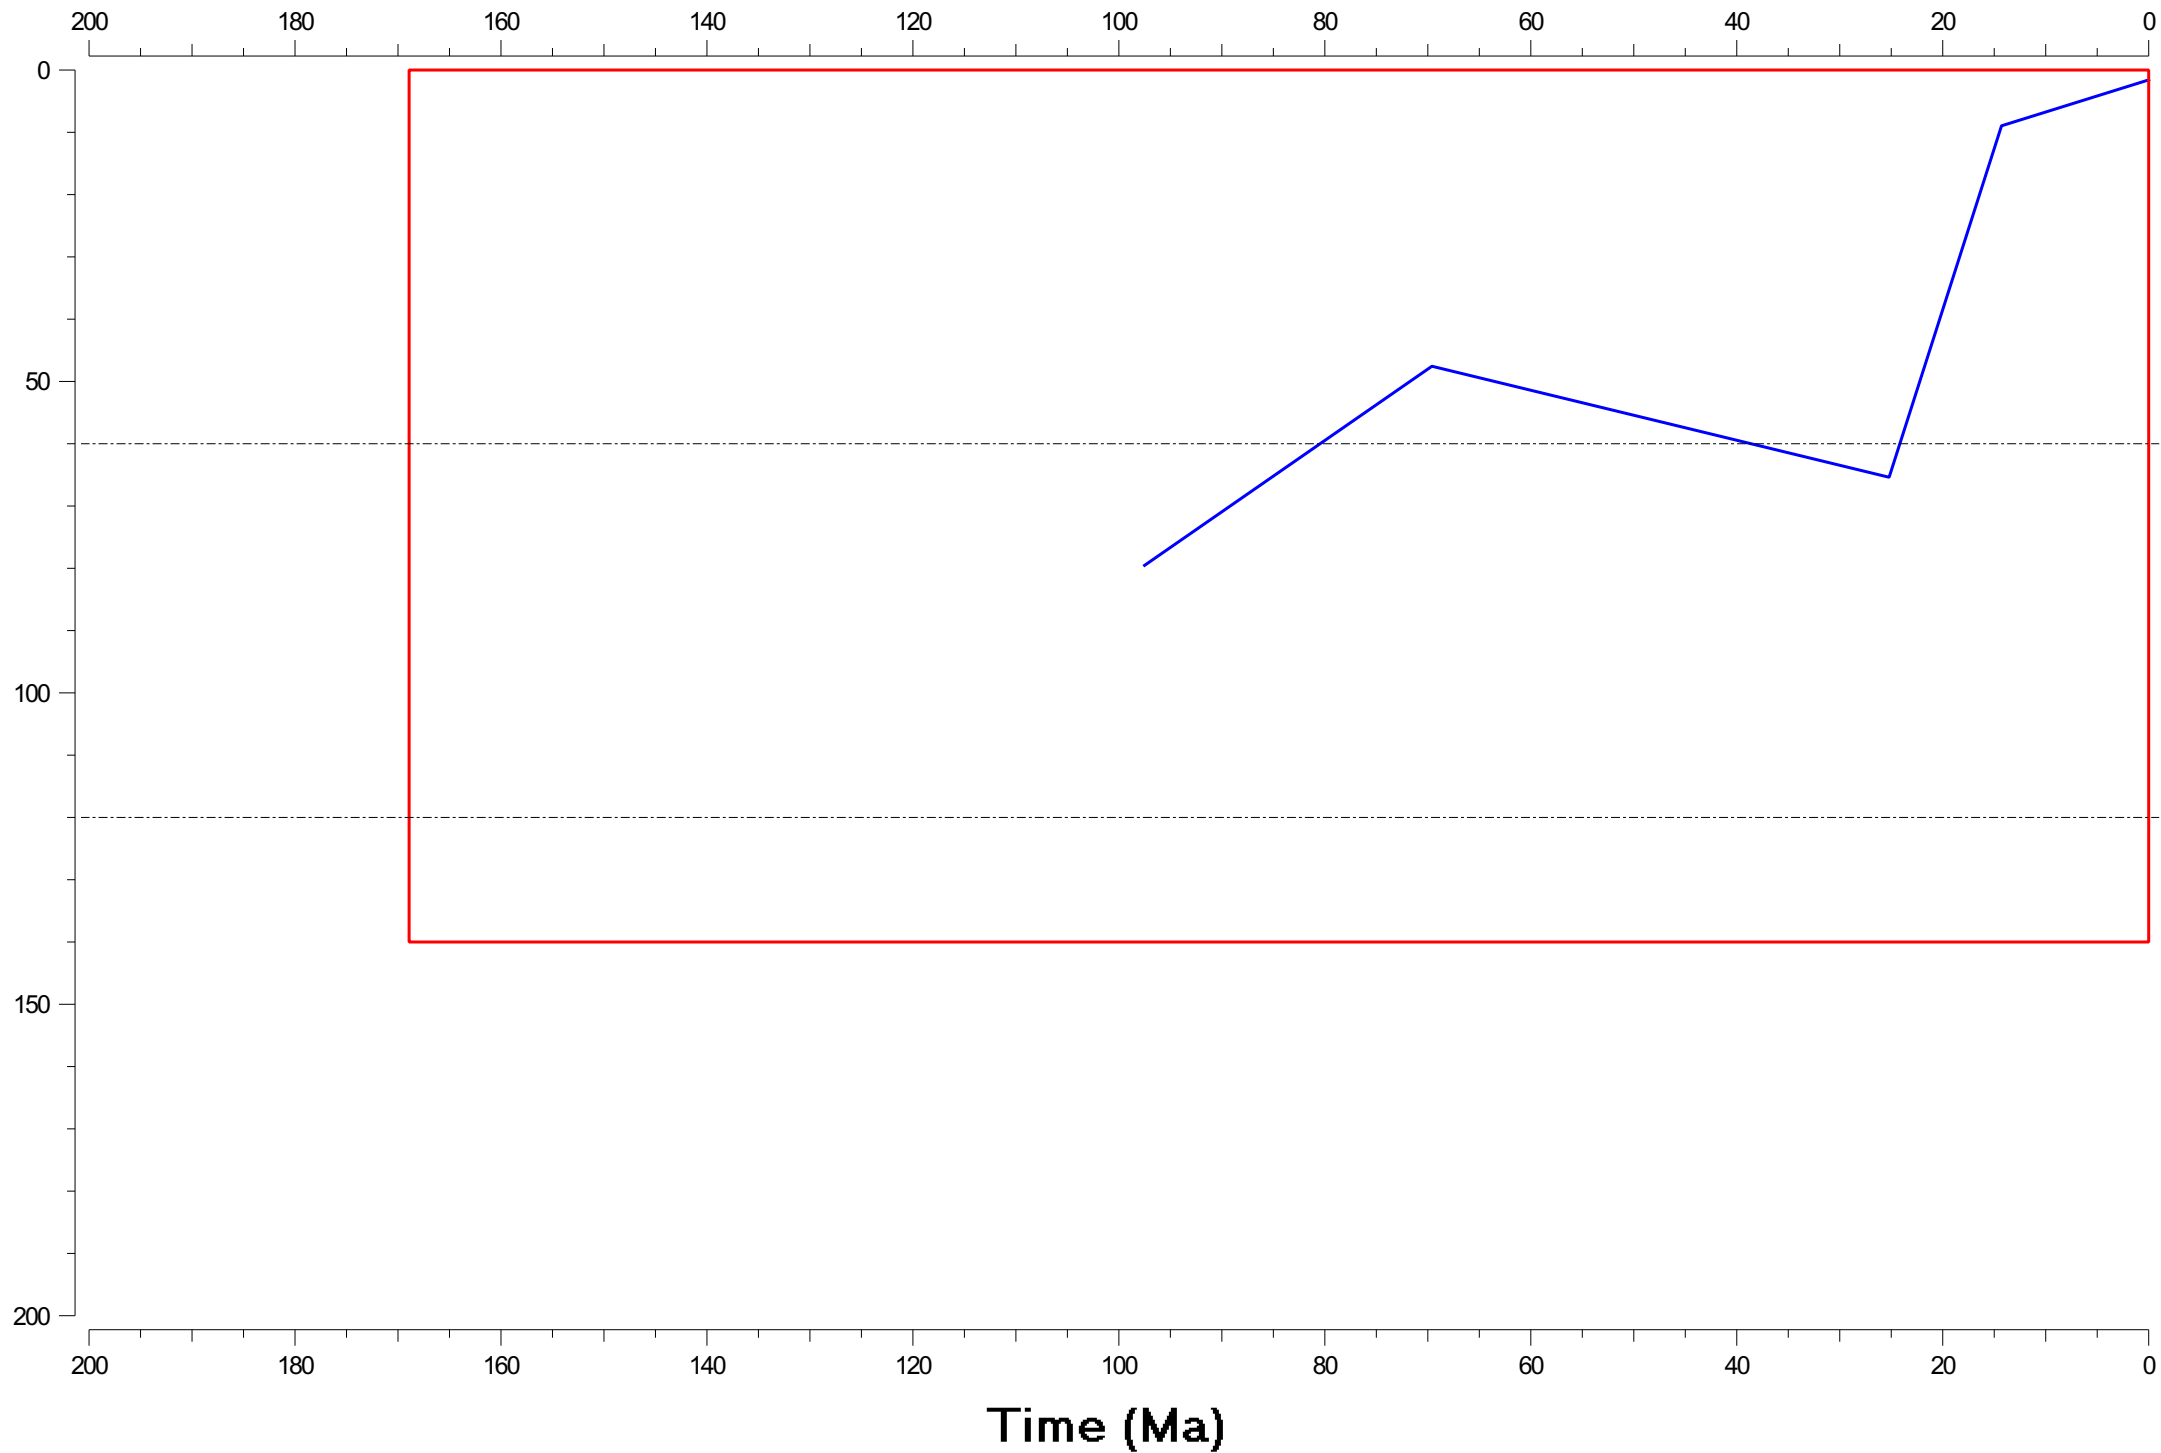

Supplement: Supplementary file 94 [file 1]

# Exercise4\_GROUPA-2\_3\_Exercise4\_InputData.txt : Max. Likelihood

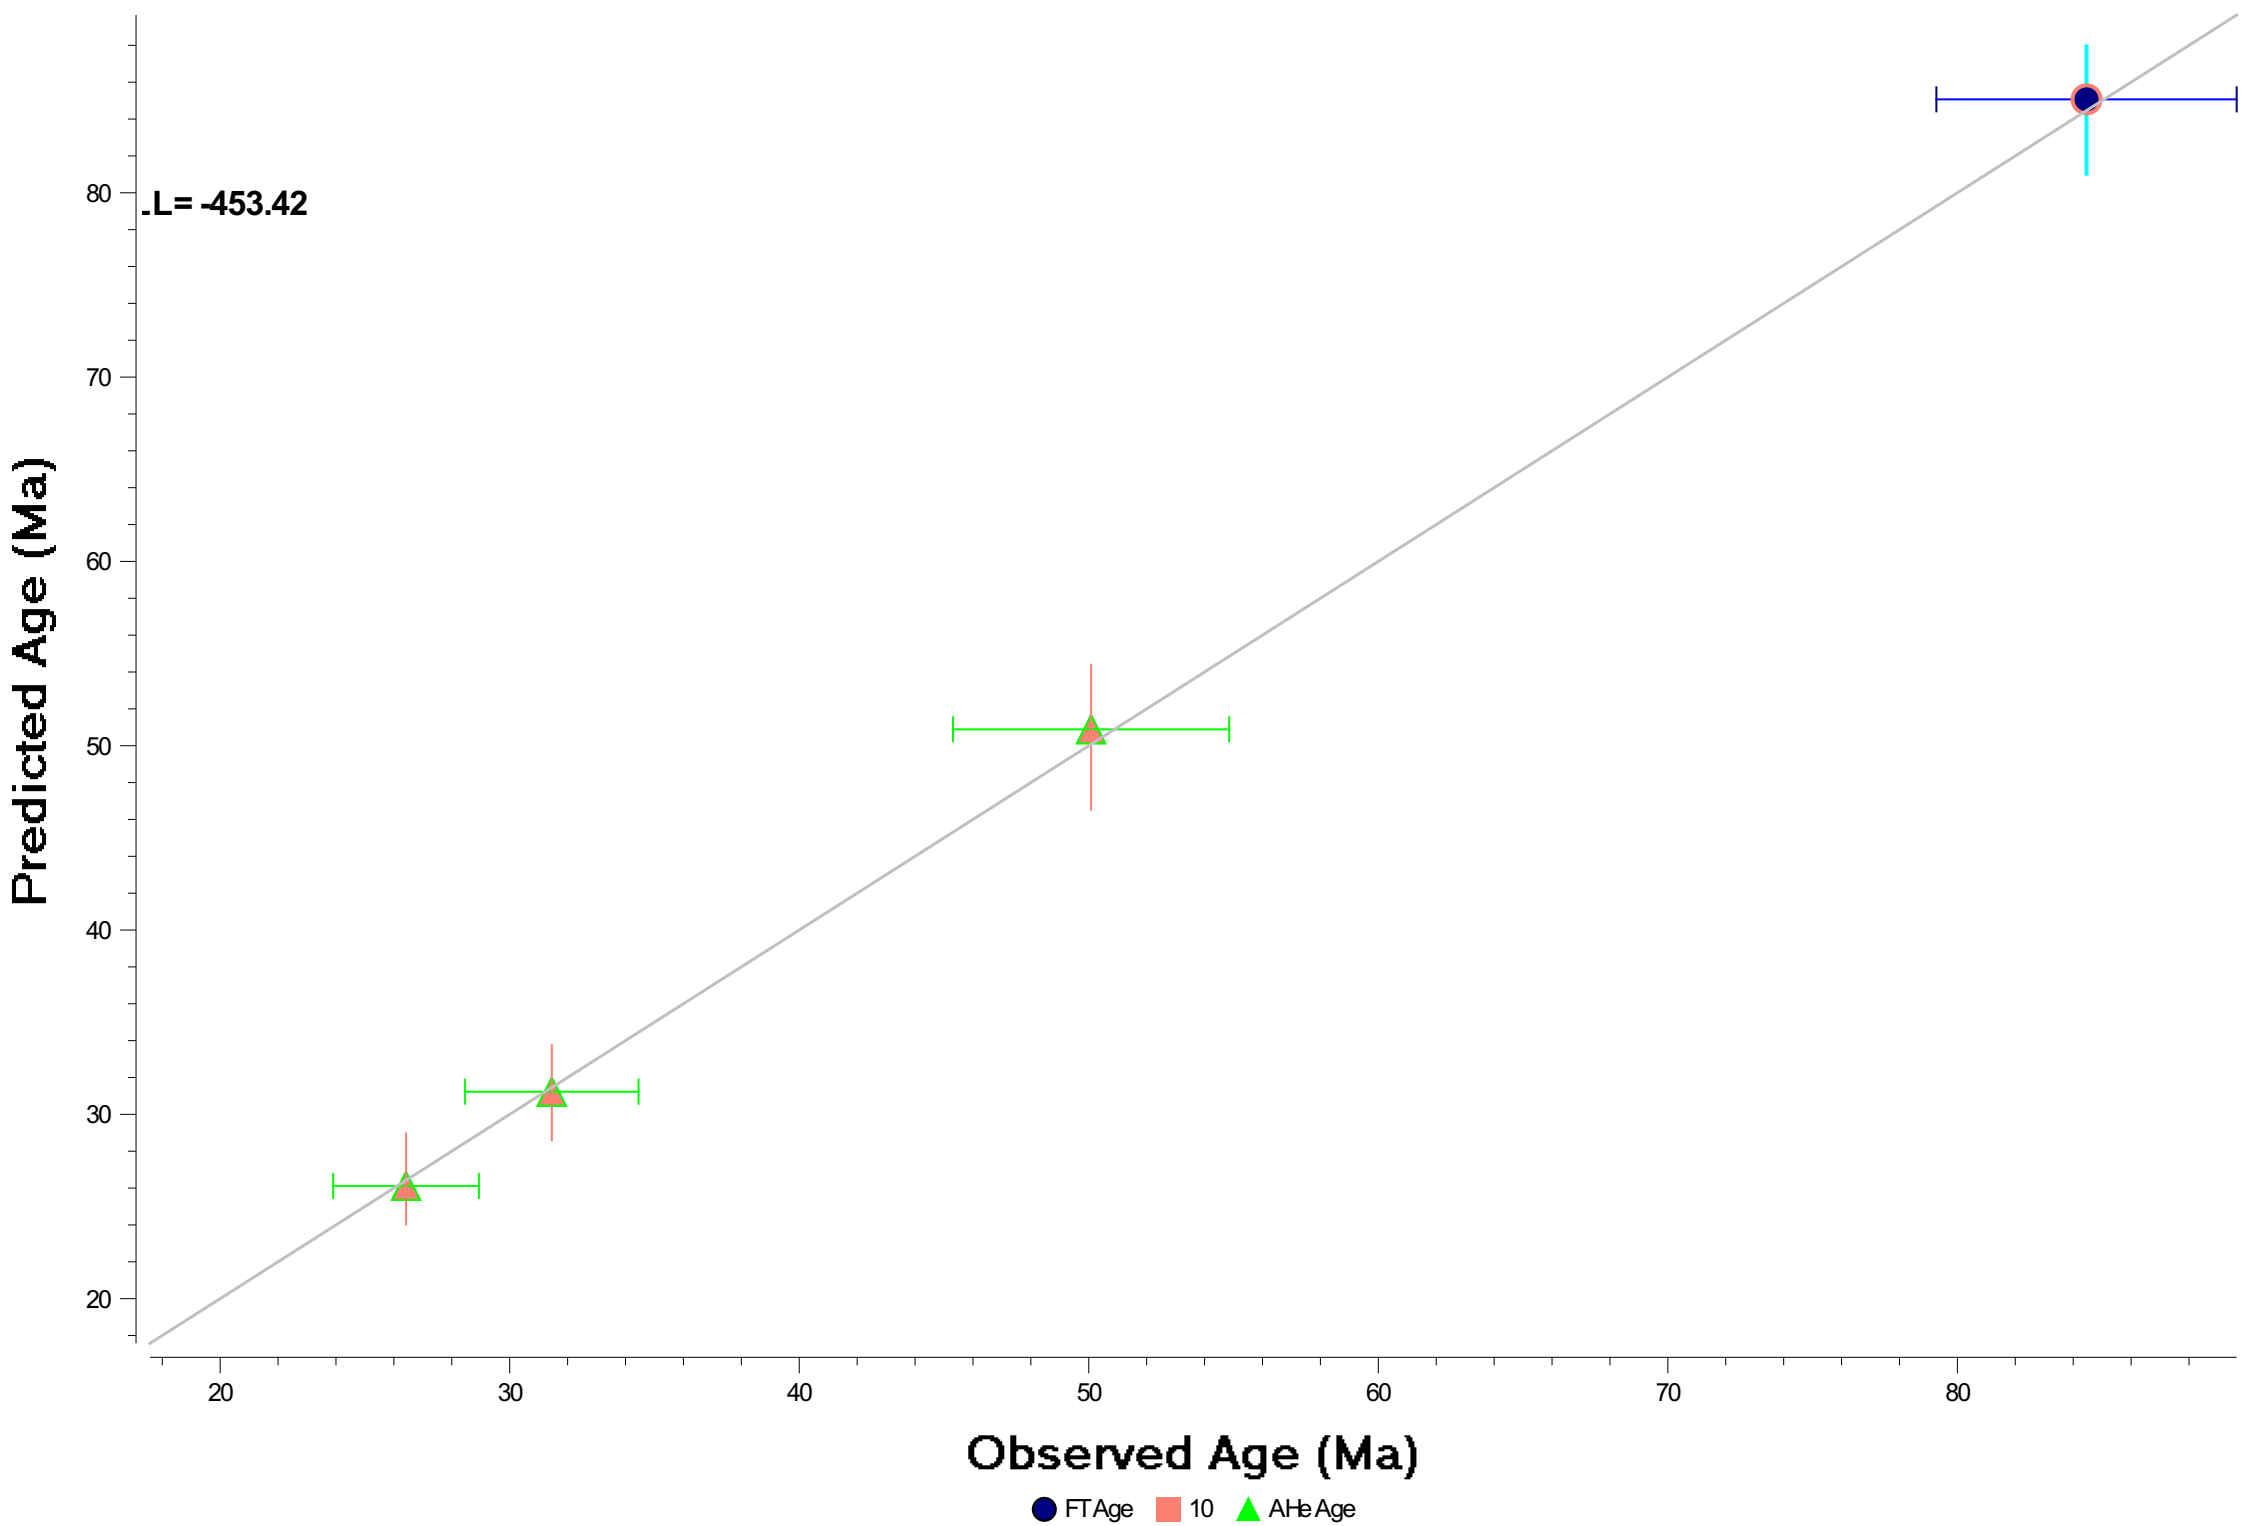

Supplement: Supplementary file 95 [file 1]

# Exercise4\_GROUPA-2\_3 : EXPECTED

Time (Ma)

Temperature (C)

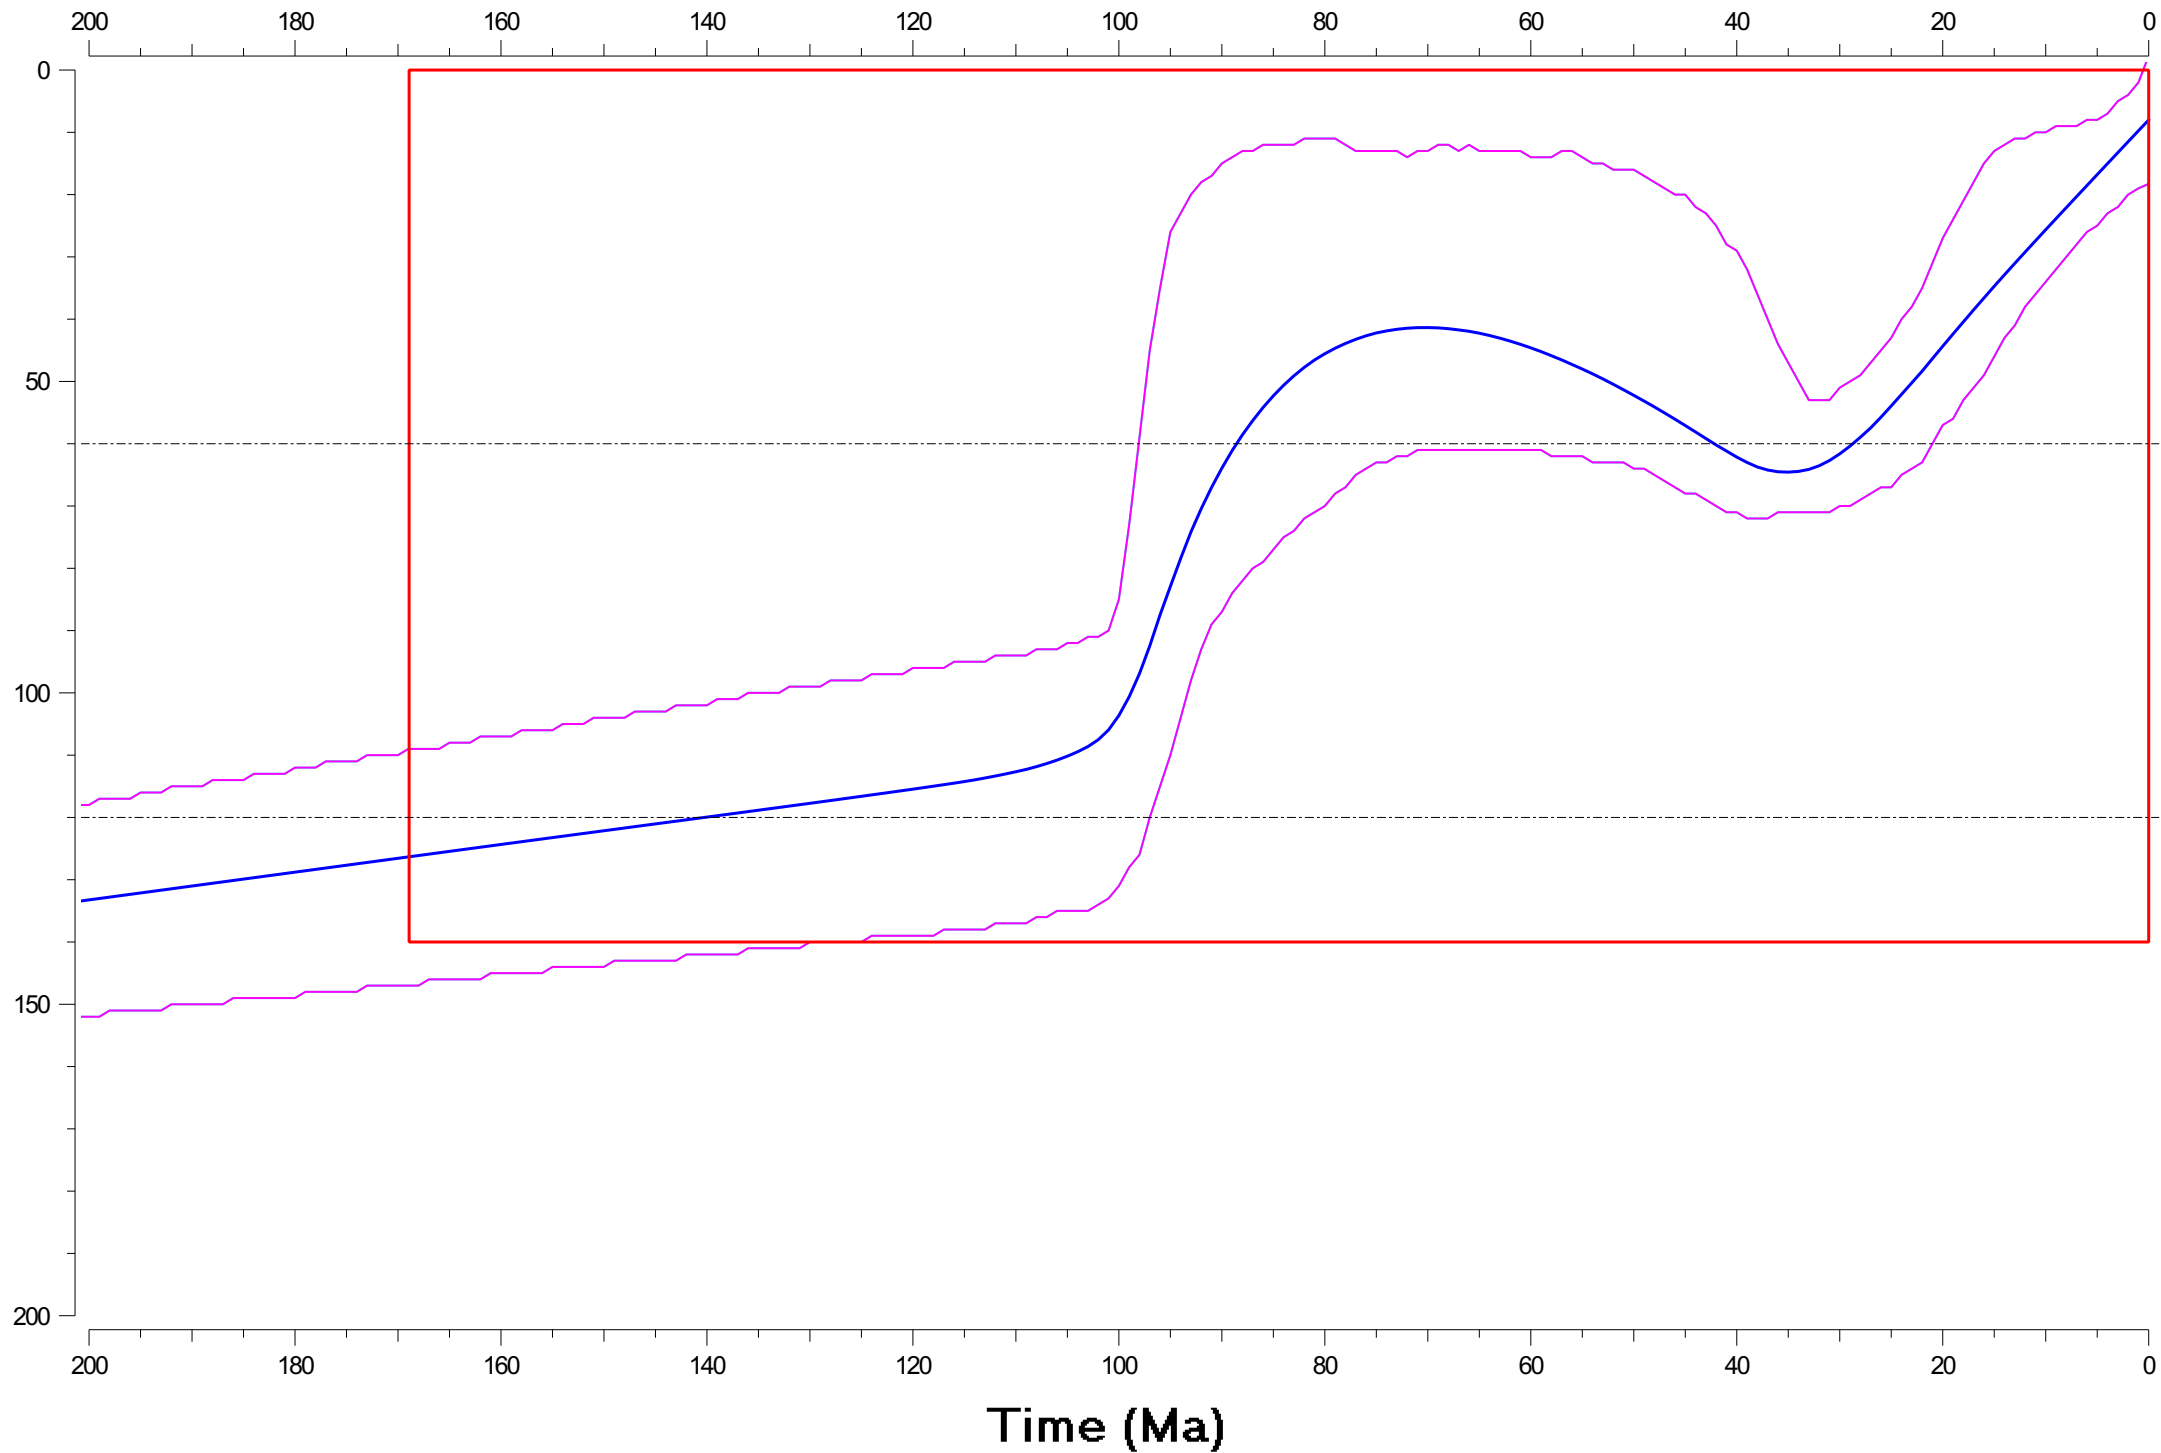

Supplement: Supplementary file 97 [file 1]

# Exercise4\_GROUPC-1\_3

Log Likelihood

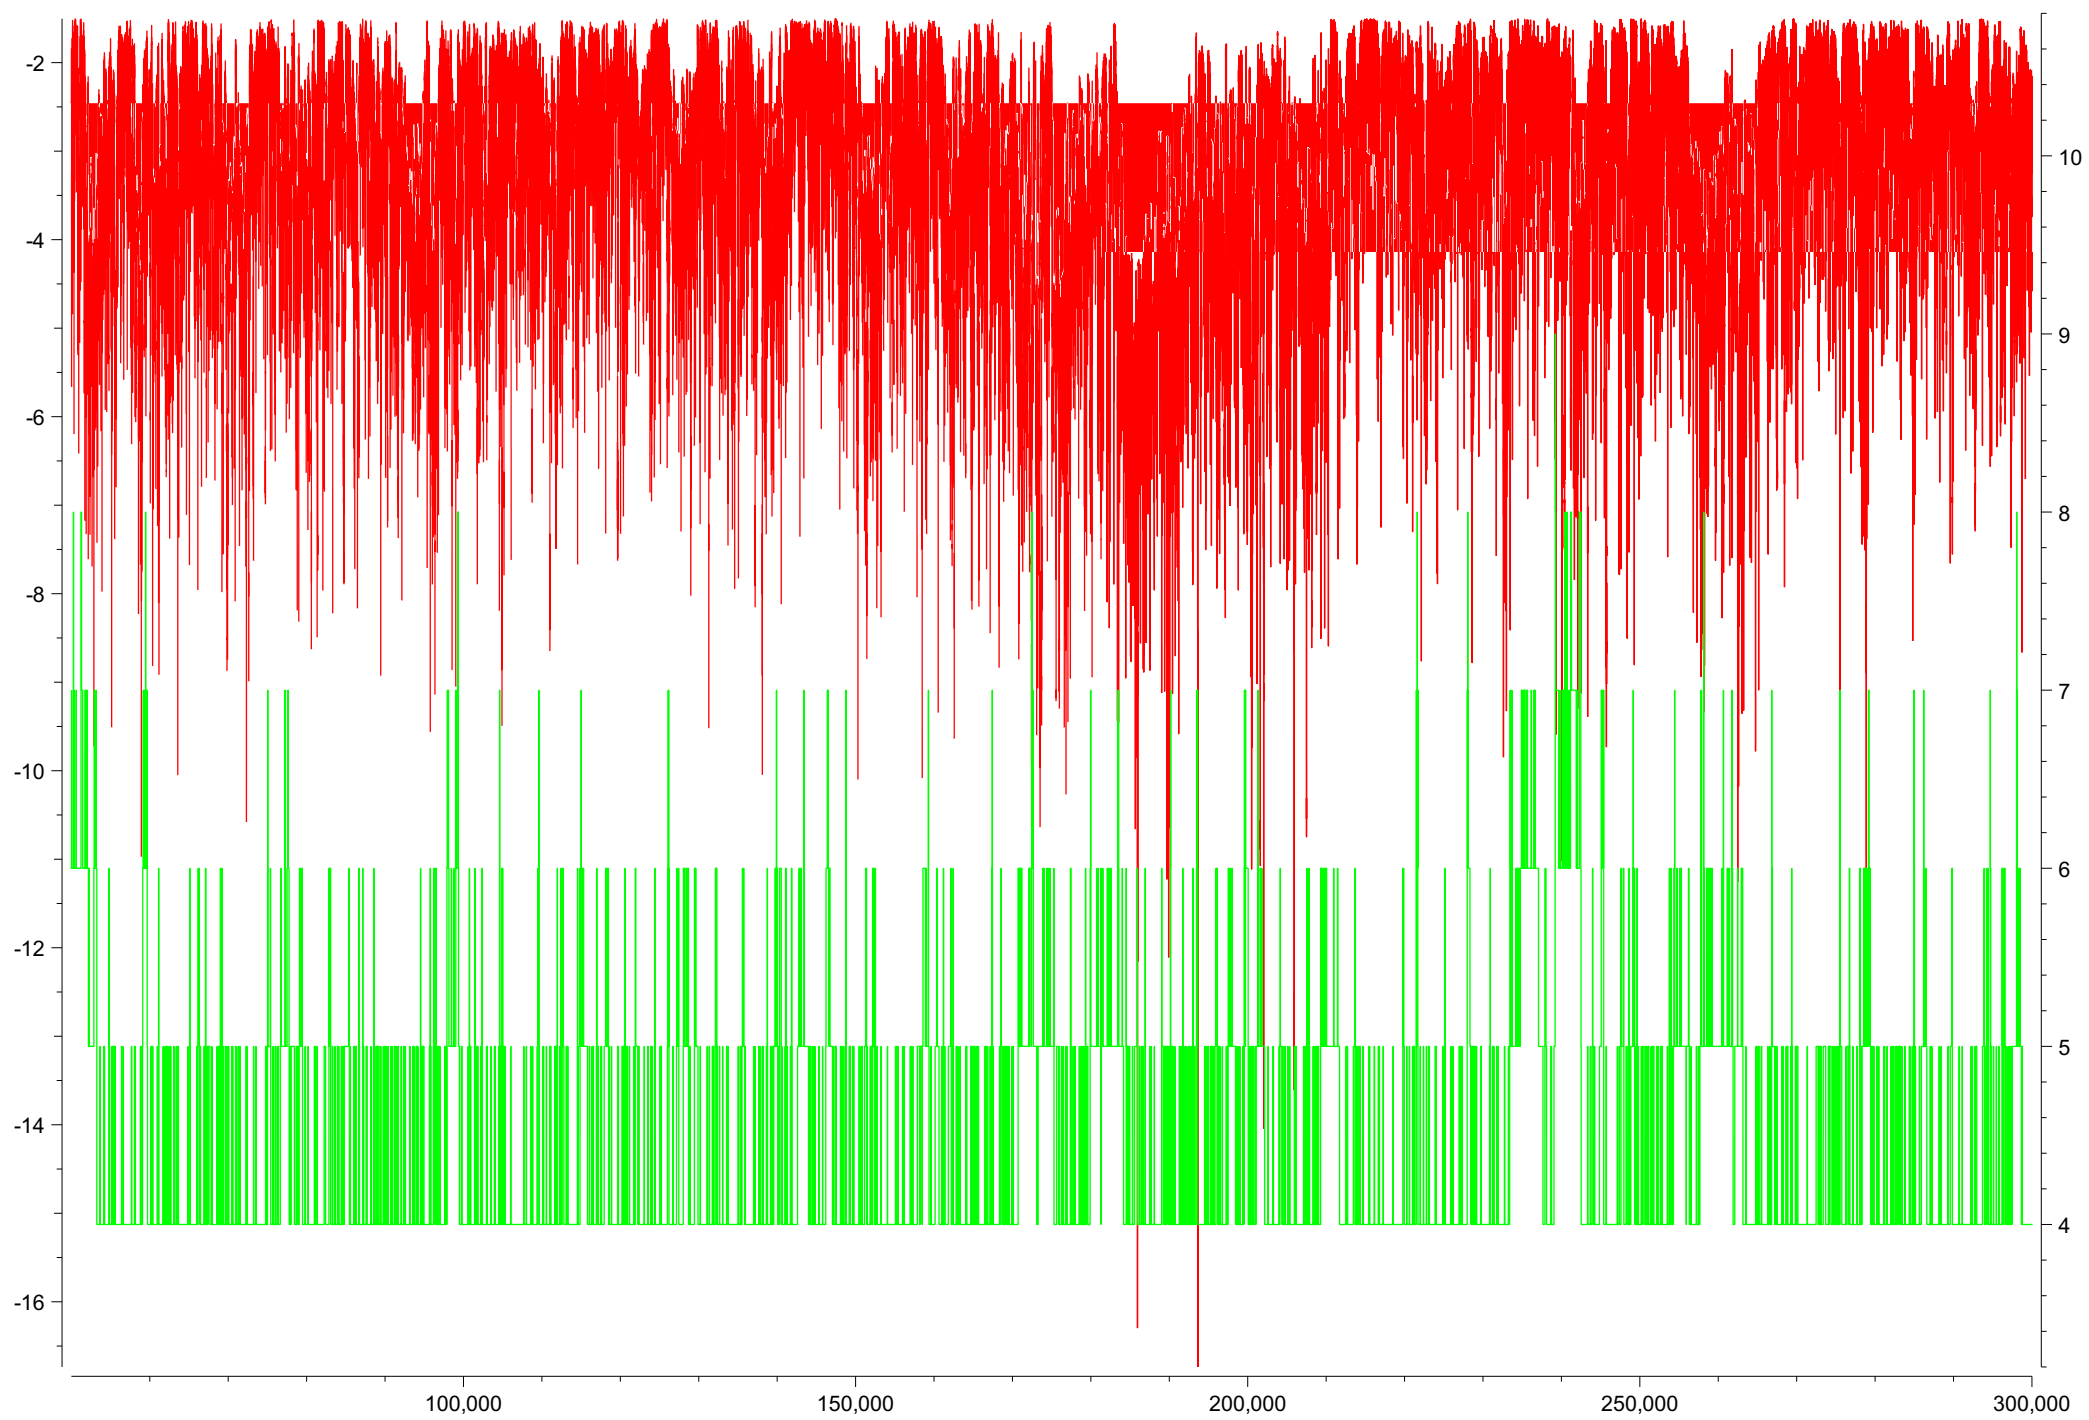

No. of T(t) points

— Likelihood — No. of T(t) points

Supplement: Supplementary file 98 [file 1]

# Exercise4\_GROUPB-2\_3 : EXPECTED

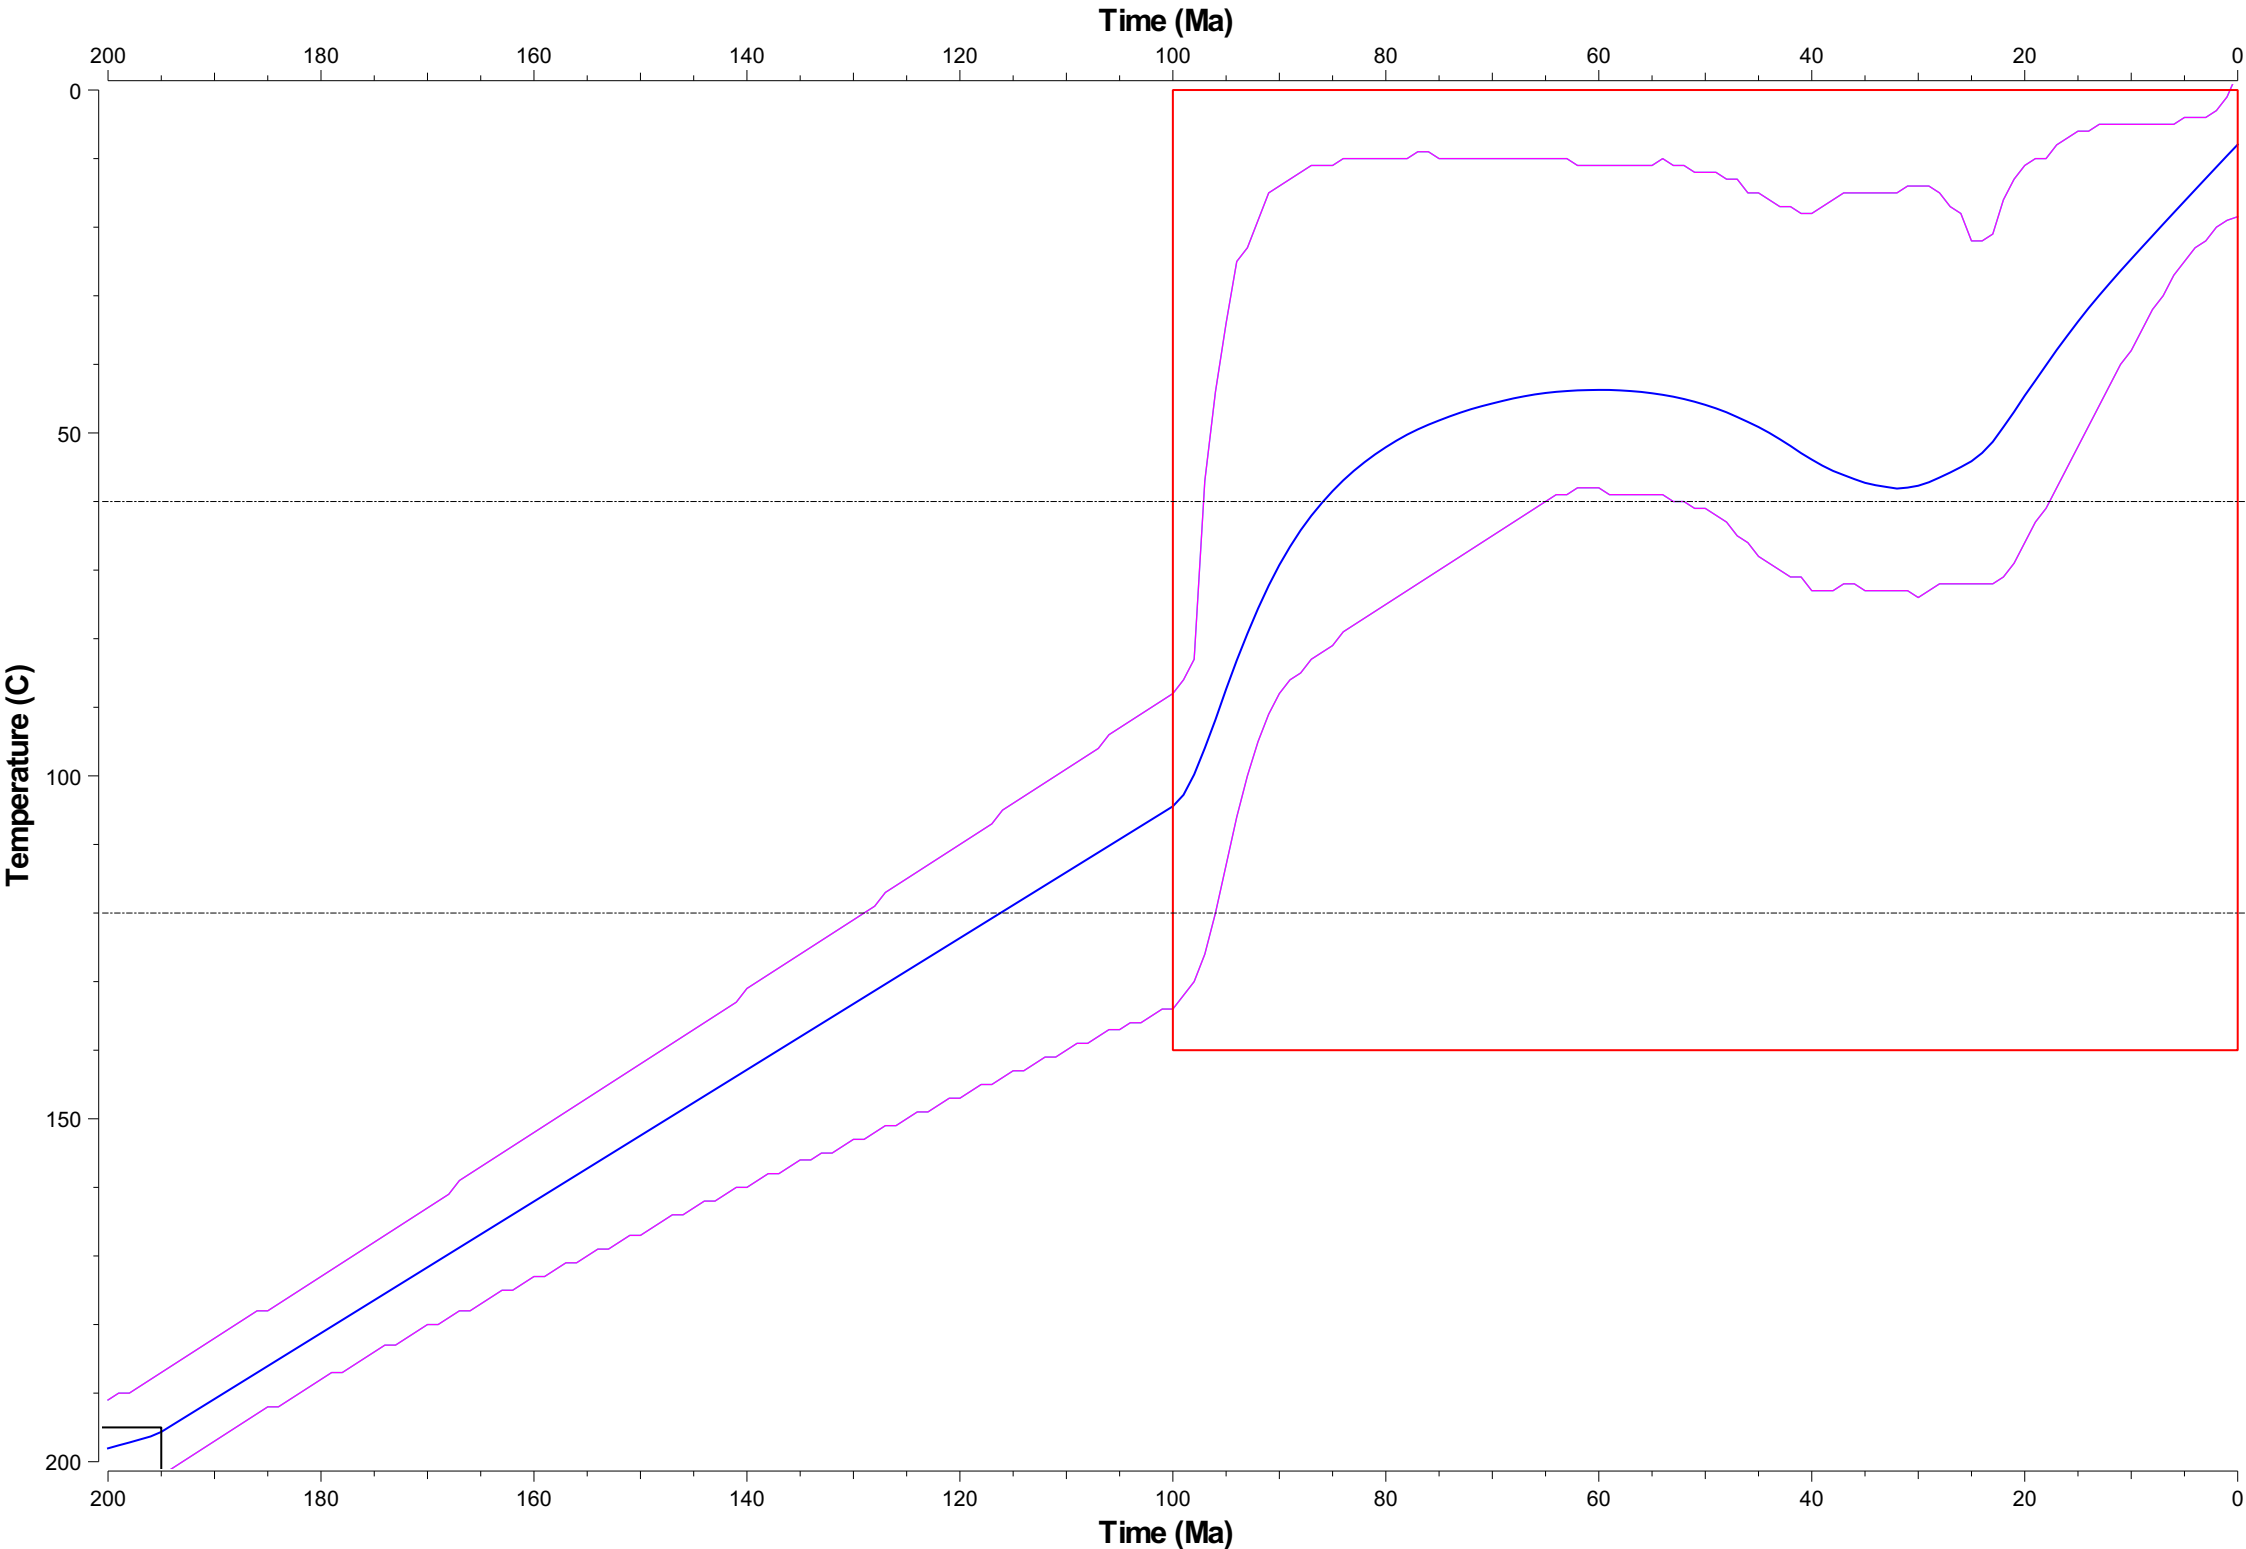

Supplement: Supplementary file 99 [file 1]

# Exercise4\_GROUPA-1\_3 : EXPECTED

Time (Ma)

Temperature (C)

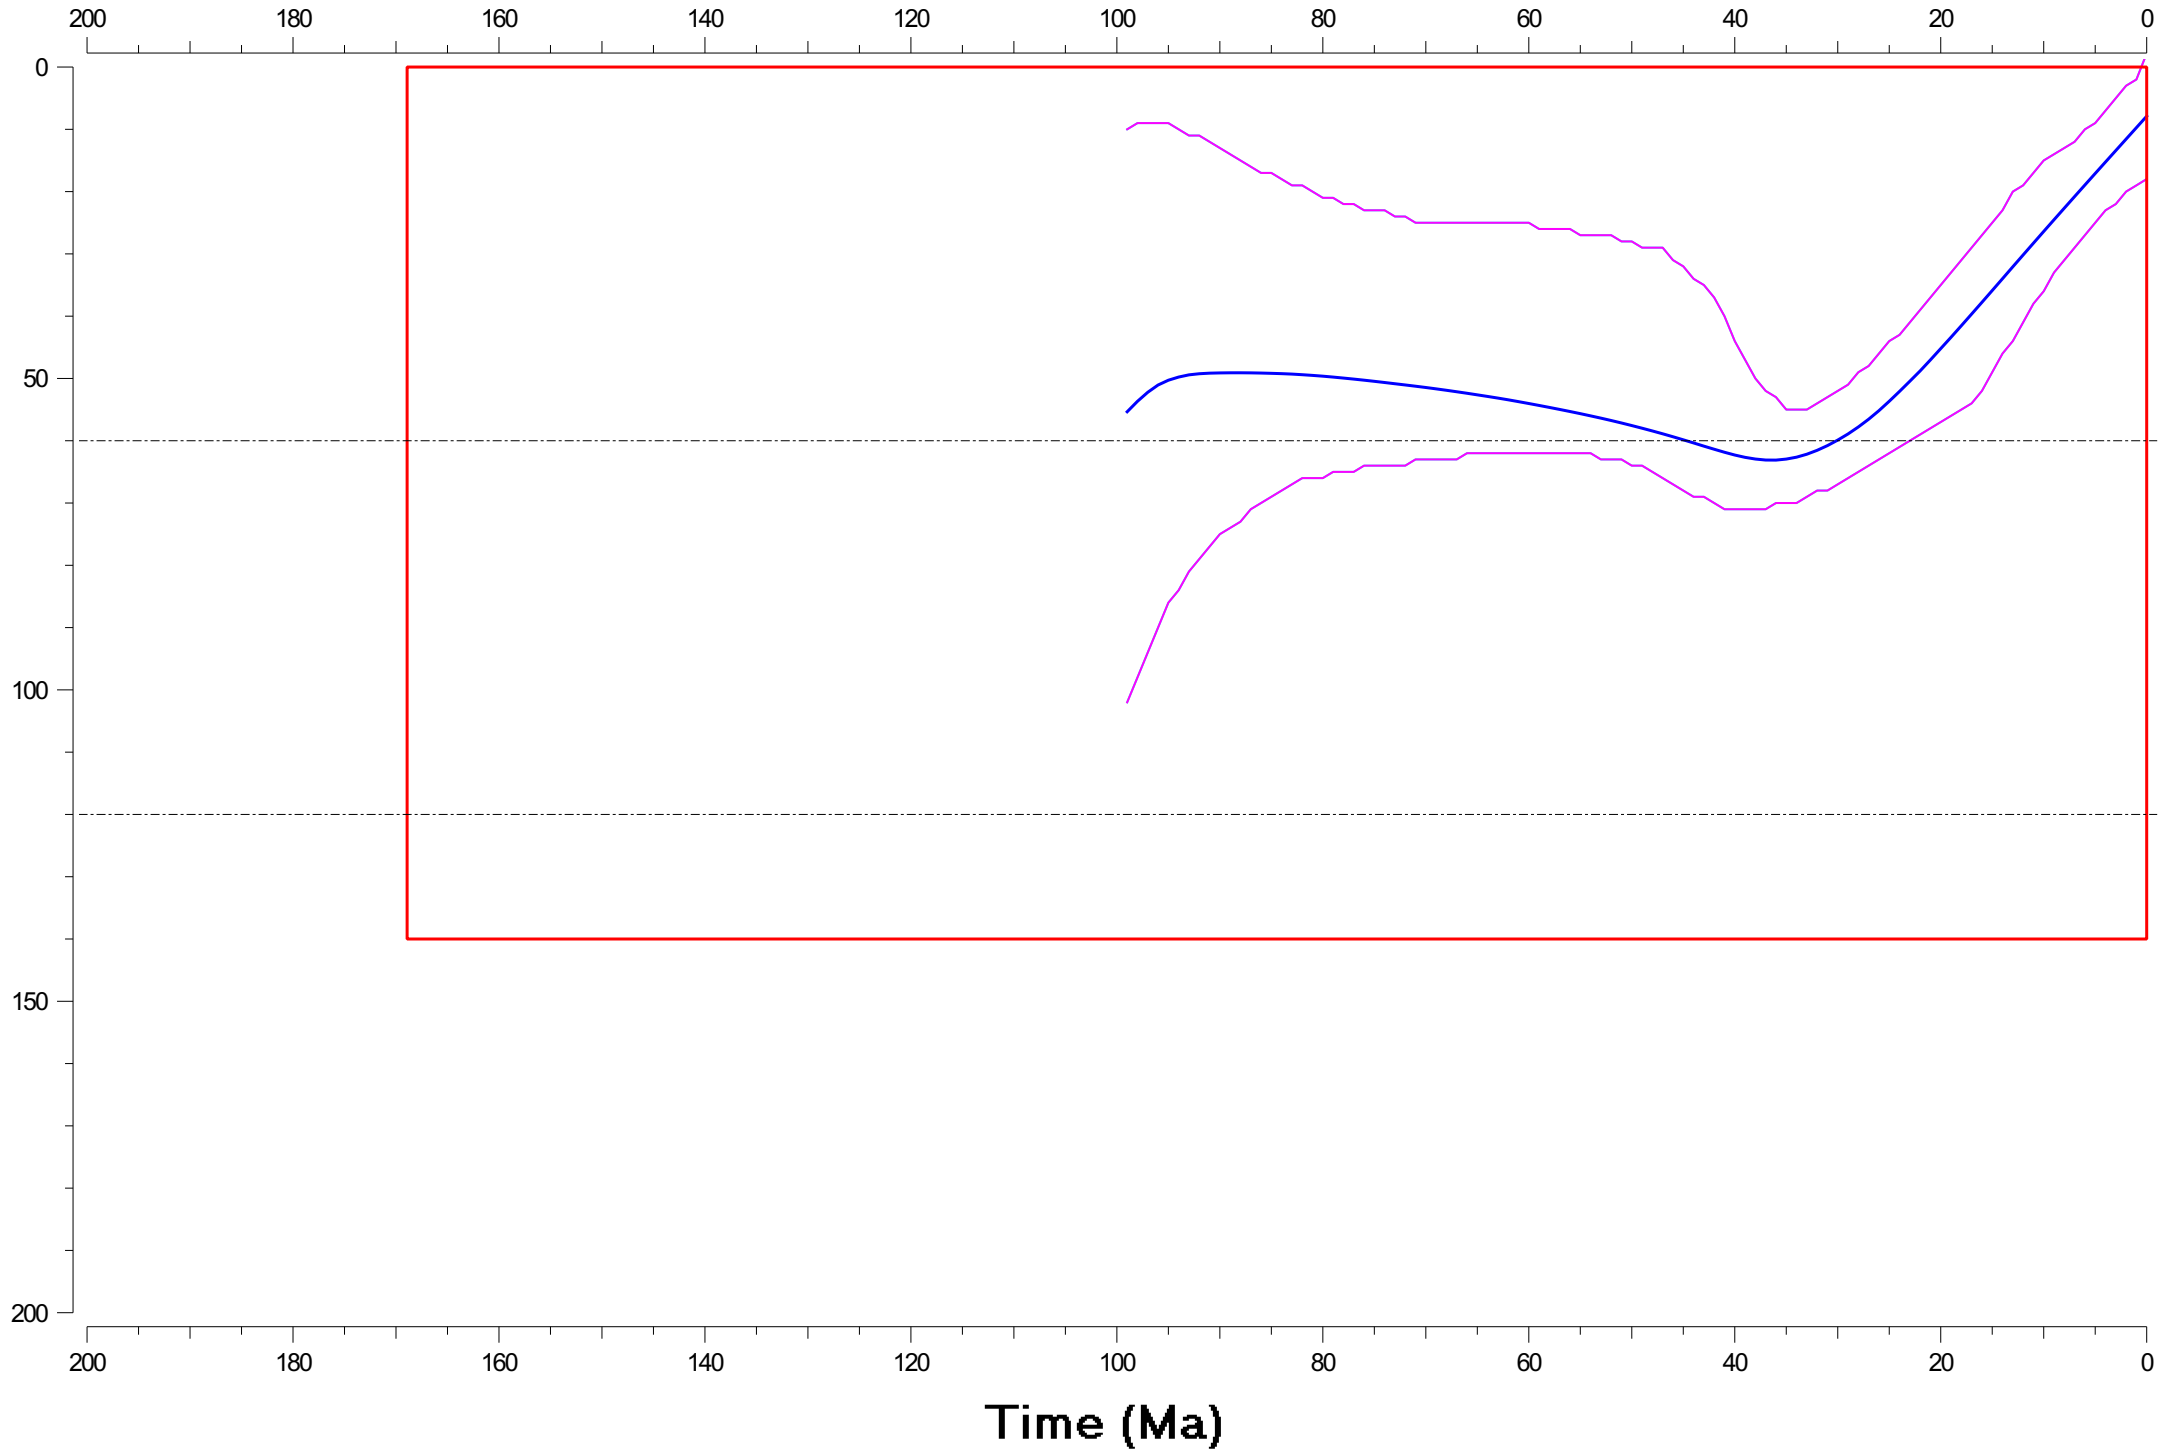

Supplement: Supplementary file 100 [file 1]

# Exercise4\_GROUPA-1\_3

Log Posterior

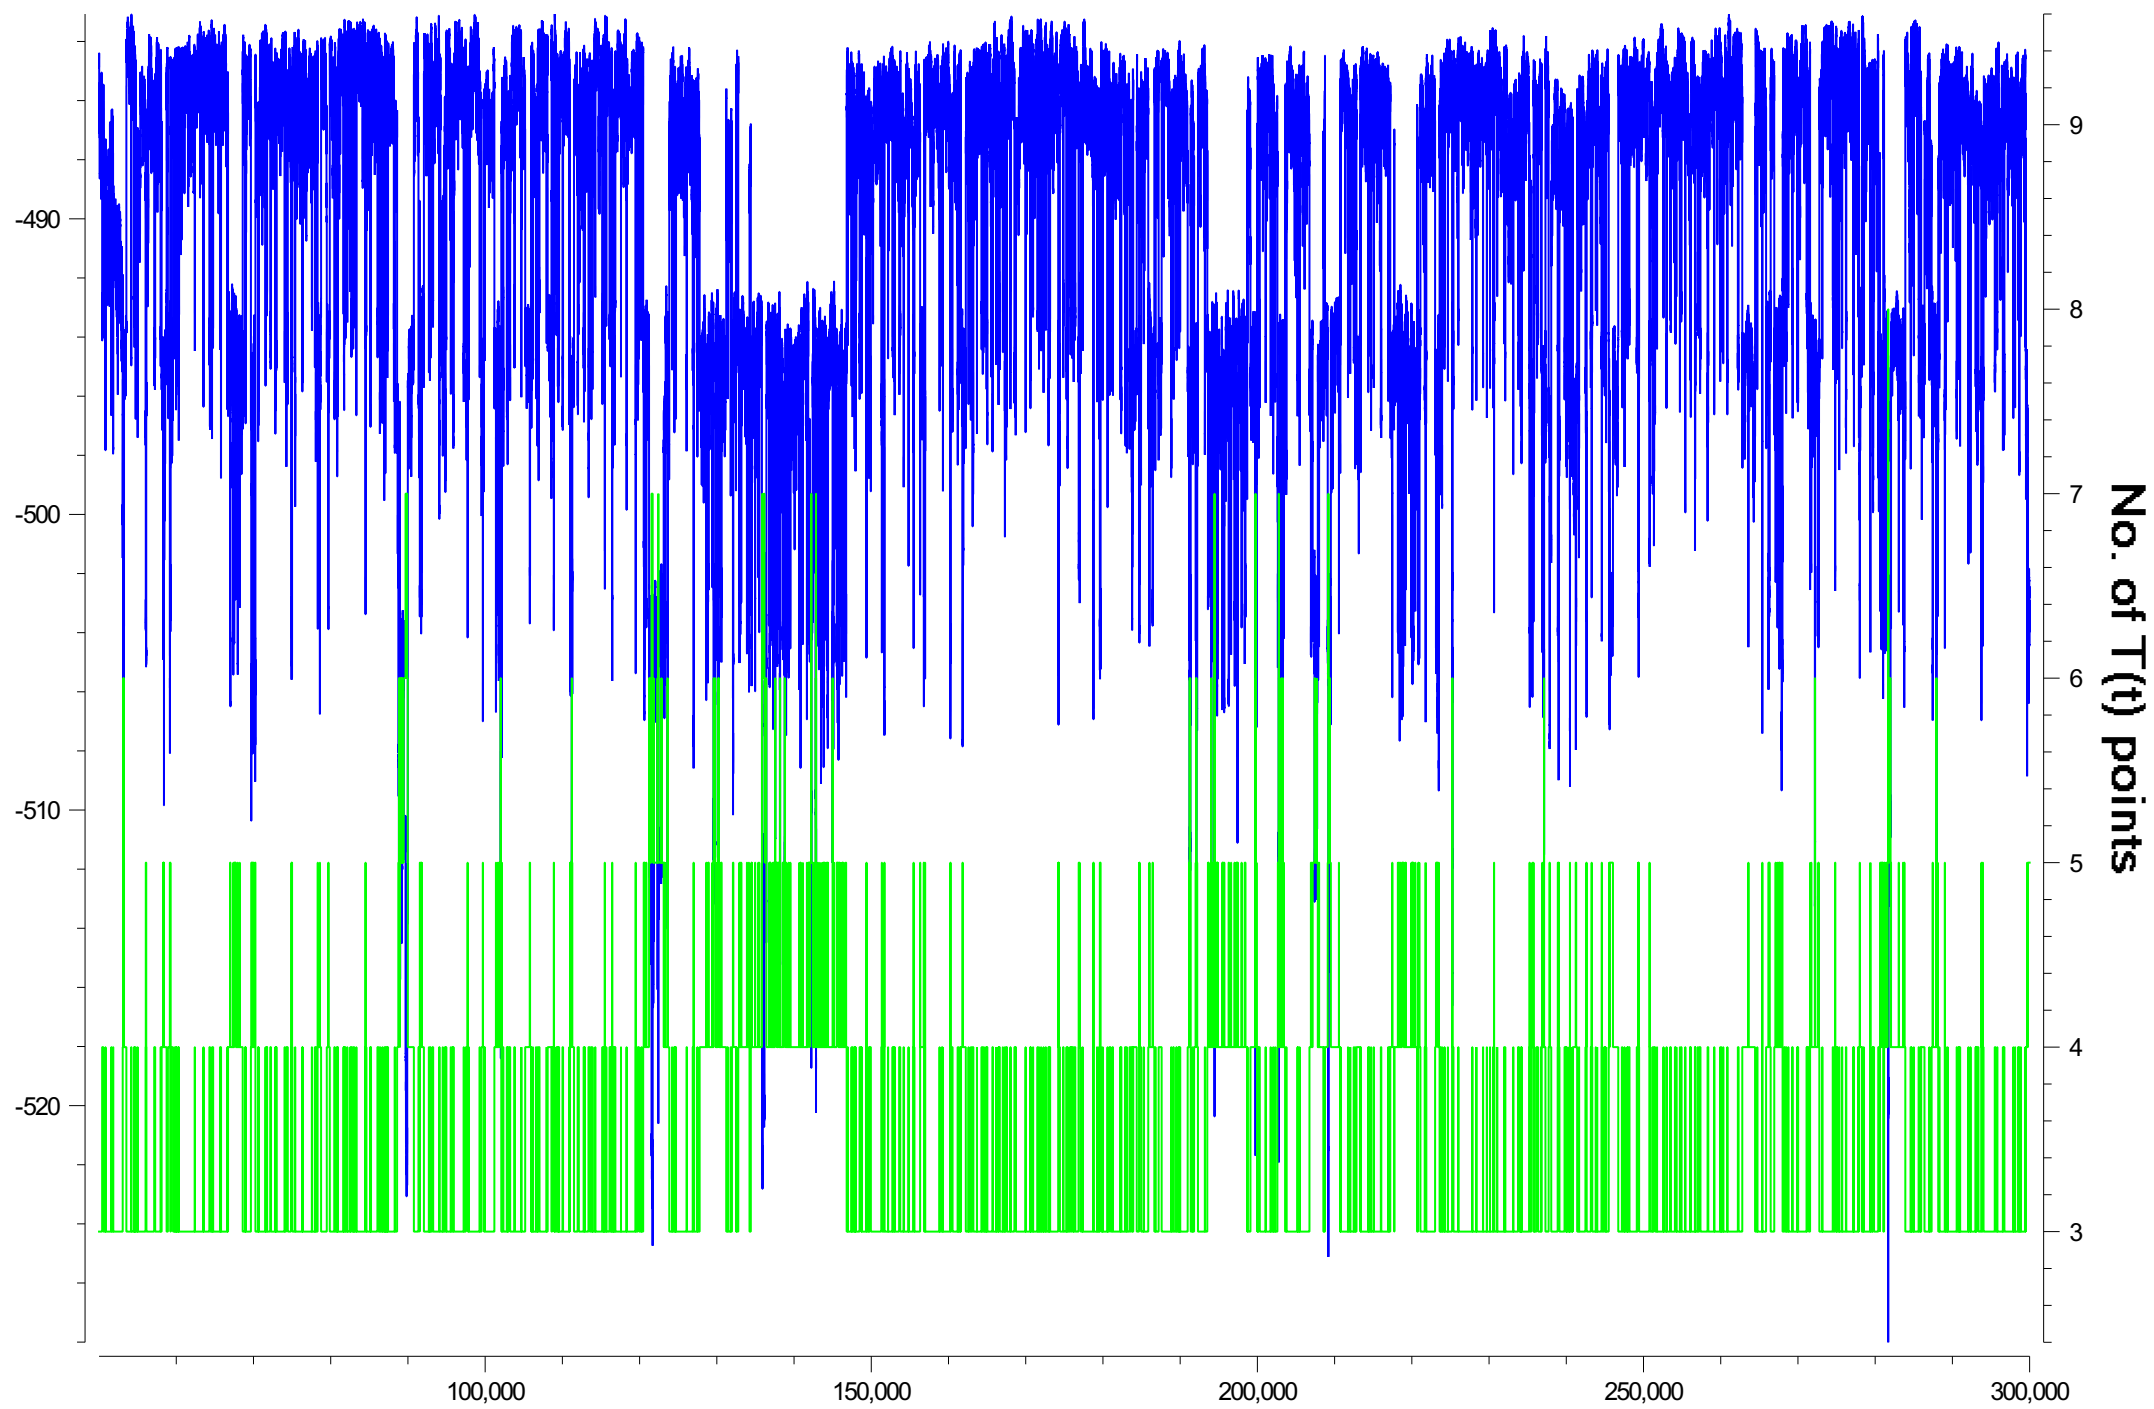

Iteration

— Posterior — Nb. of  $T(t)$  points

Supplement: Supplementary file 101 [file 1]

# Exercise4\_GROUPB-1\_3

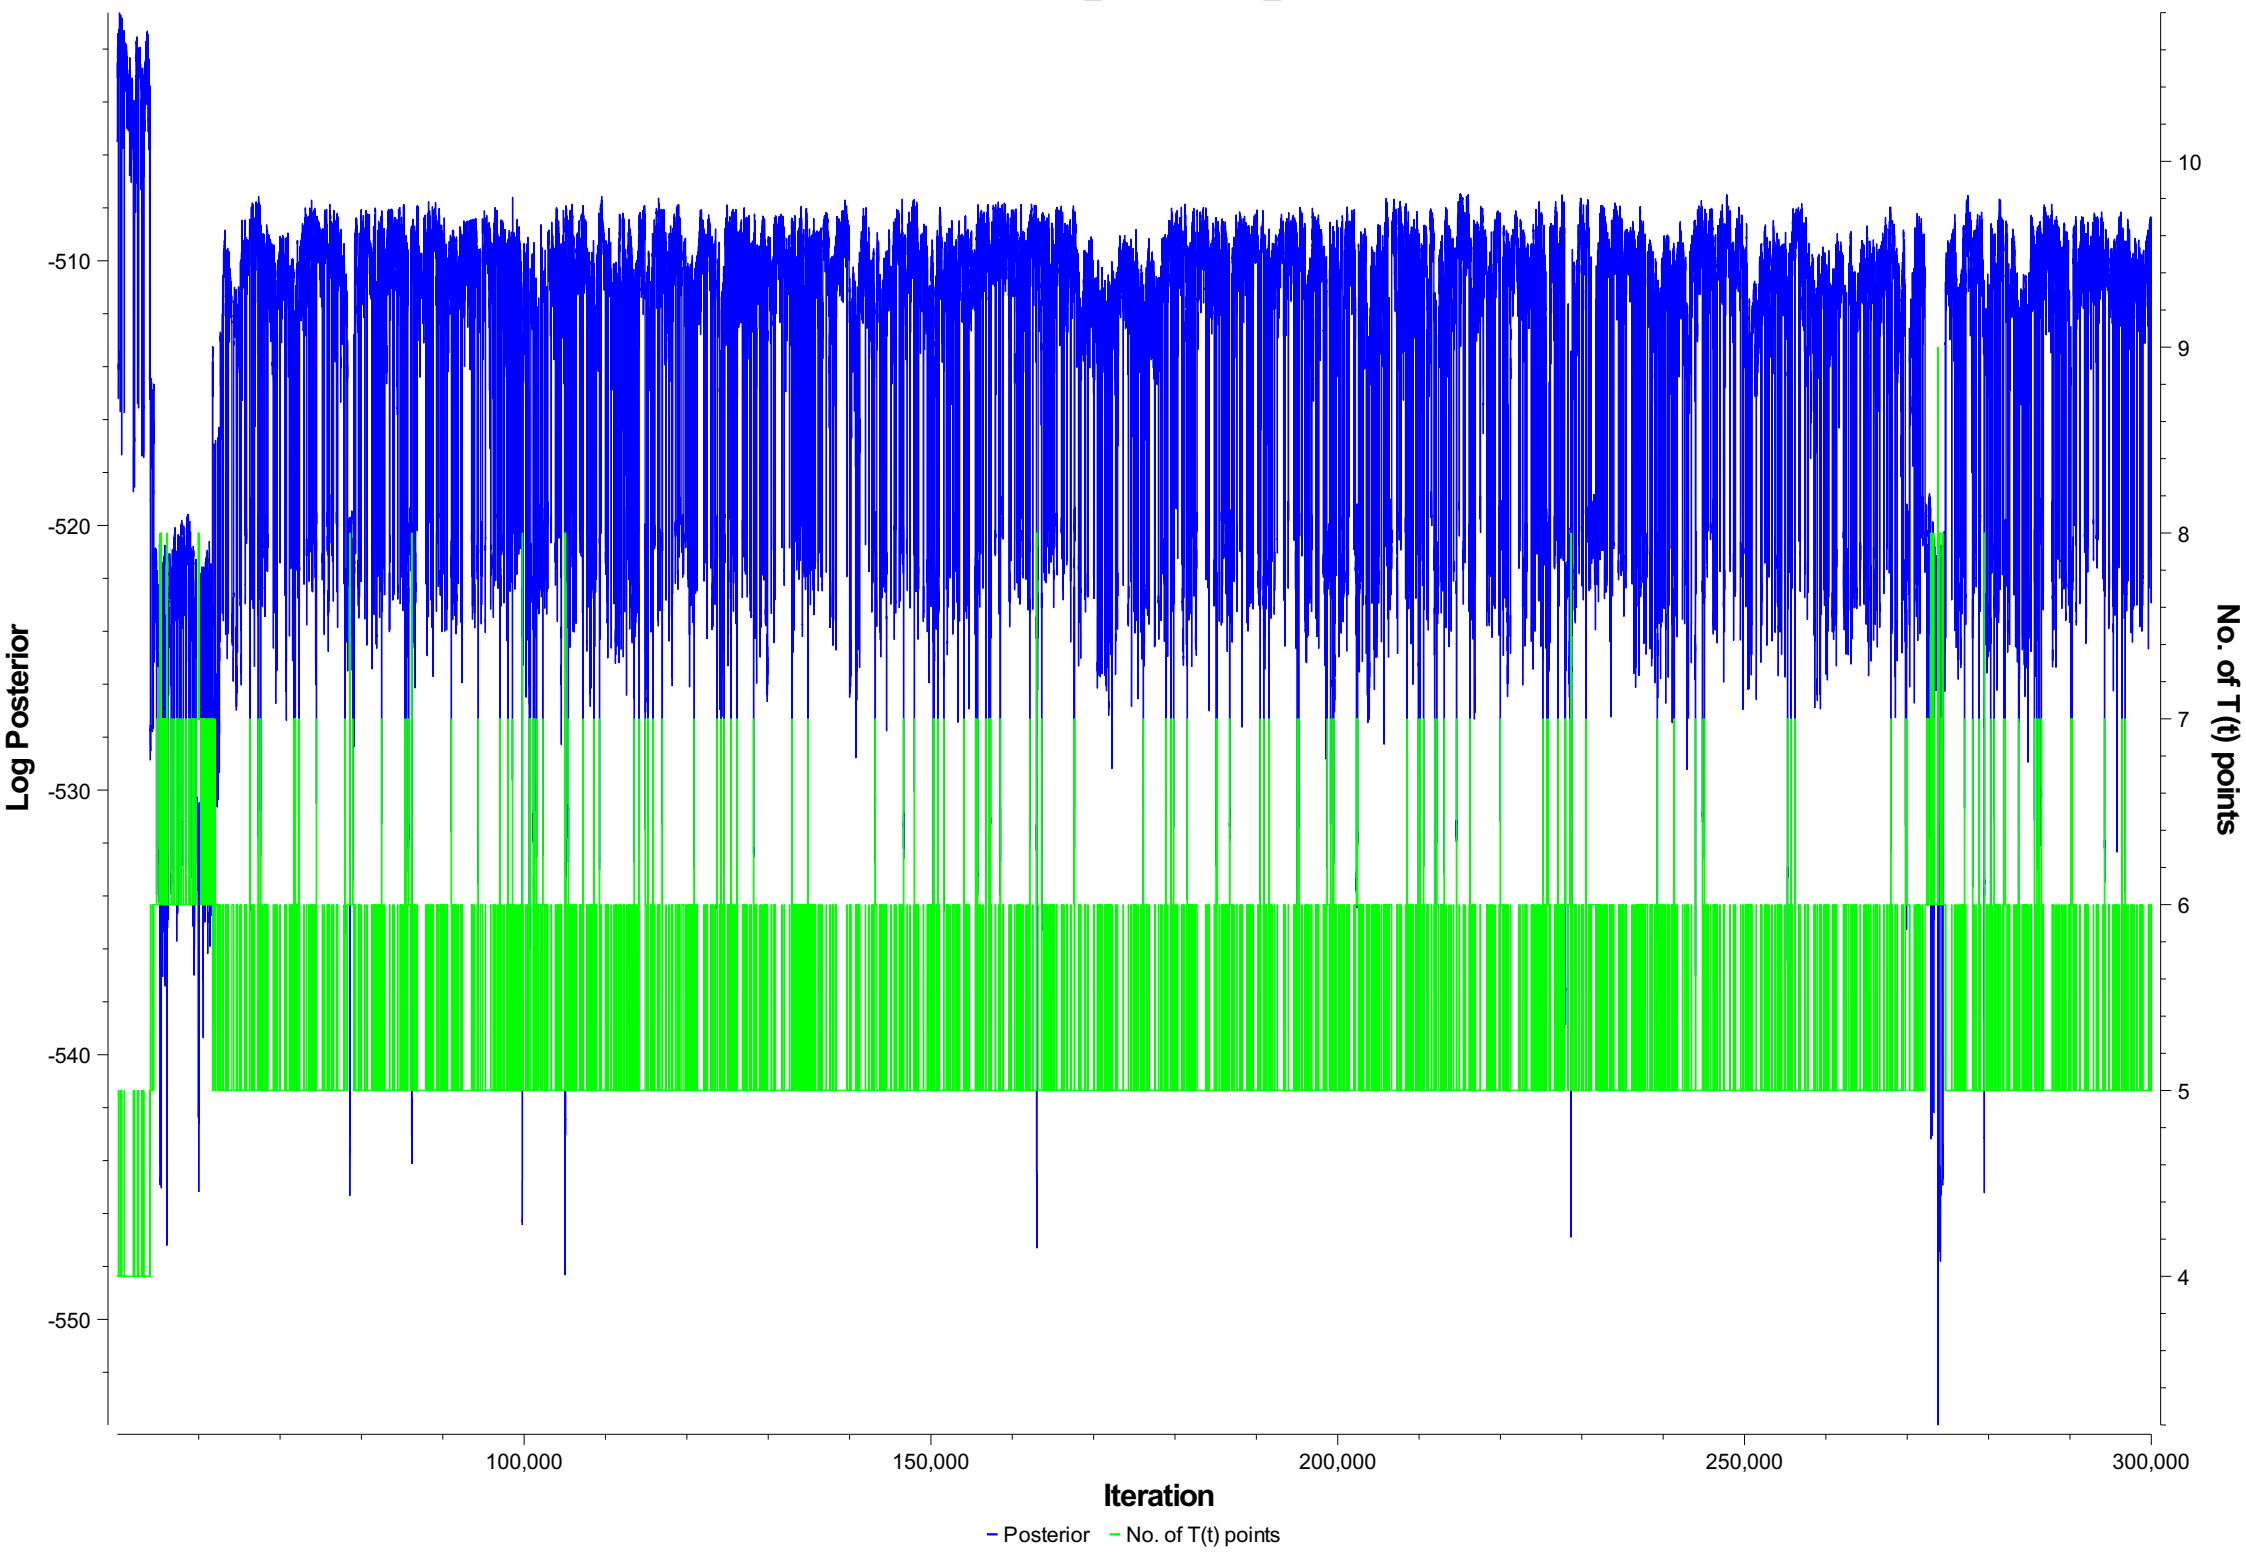

Supplement: Supplementary file 102 [file 1]
